# Supplementary material for: Albugo-imposed changes to tryptophan-derived antimicrobial metabolite biosynthesis may contribute to suppression of non-host resistance to Phytophthora infestans in Arabidopsis thaliana
Source: PubMed Central journal article supplement (PMC5358052; doi:10.1186/s12915-017-0360-z), 2017-03-20

RFP

Brightfield

Overlay

A

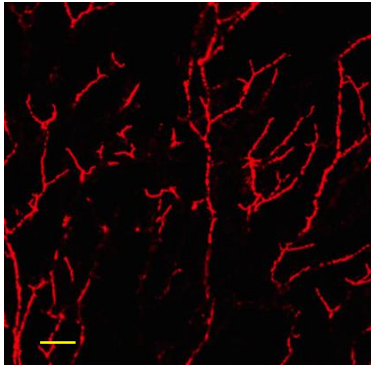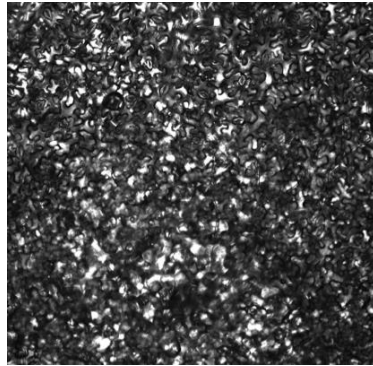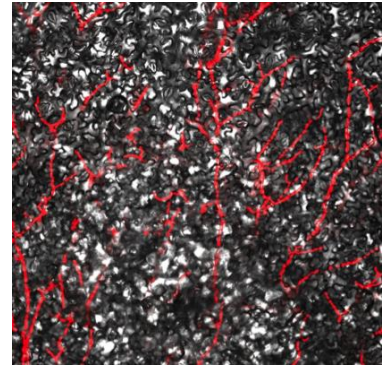

B

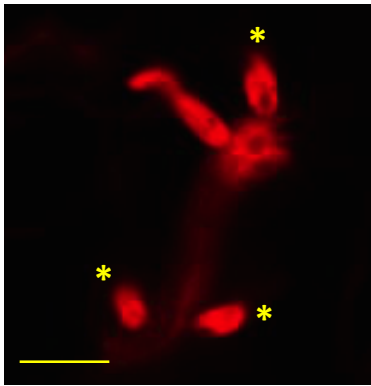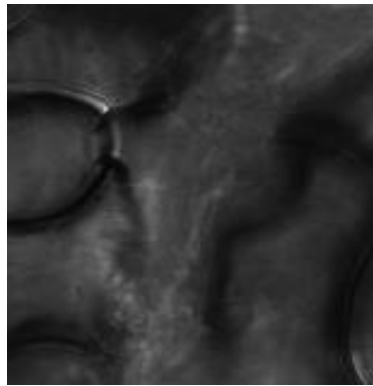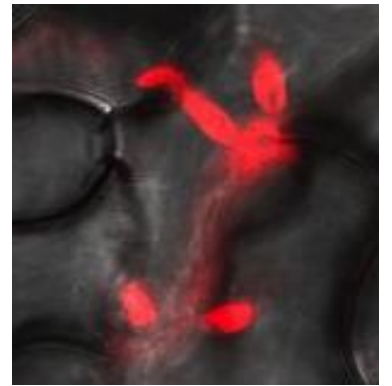

C

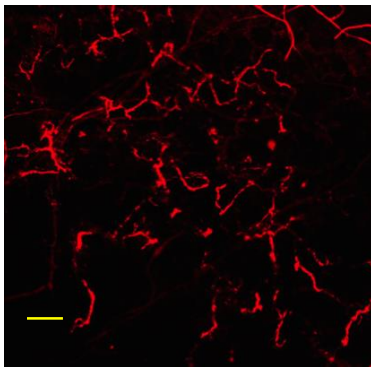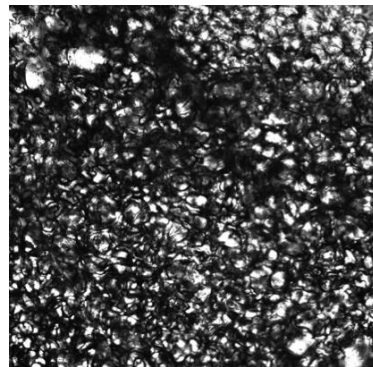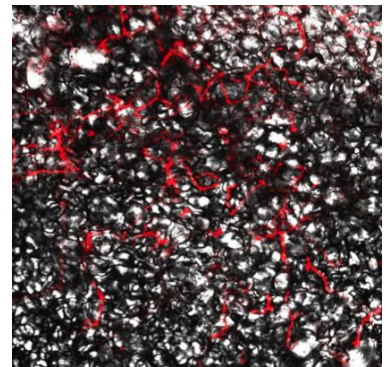

D

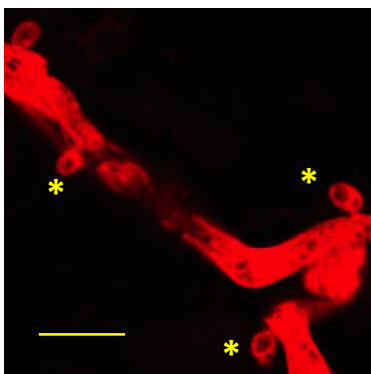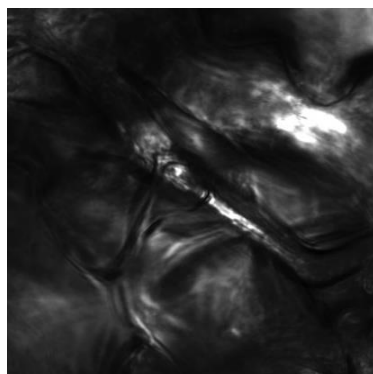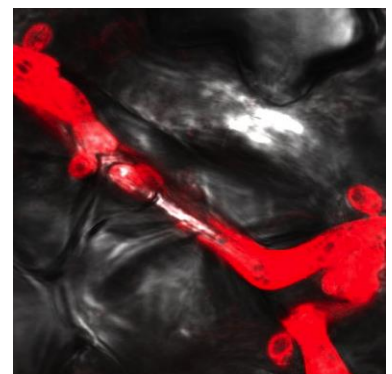

Supplement: 12915_2017_360_MOESM14_ESM.pdf [file 12915_2017_360_MOESM14_ESM.pdf]
