# Supplementary material for: Albugo-imposed changes to tryptophan-derived antimicrobial metabolite biosynthesis may contribute to suppression of non-host resistance to Phytophthora infestans in Arabidopsis thaliana
Source: PubMed Central journal article supplement (PMC5358052; doi:10.1186/s12915-017-0360-z), 2017-03-20
Supplement: 12915_2017_360_MOESM21_ESM.pdf [file 12915_2017_360_MOESM21_ESM.pdf]

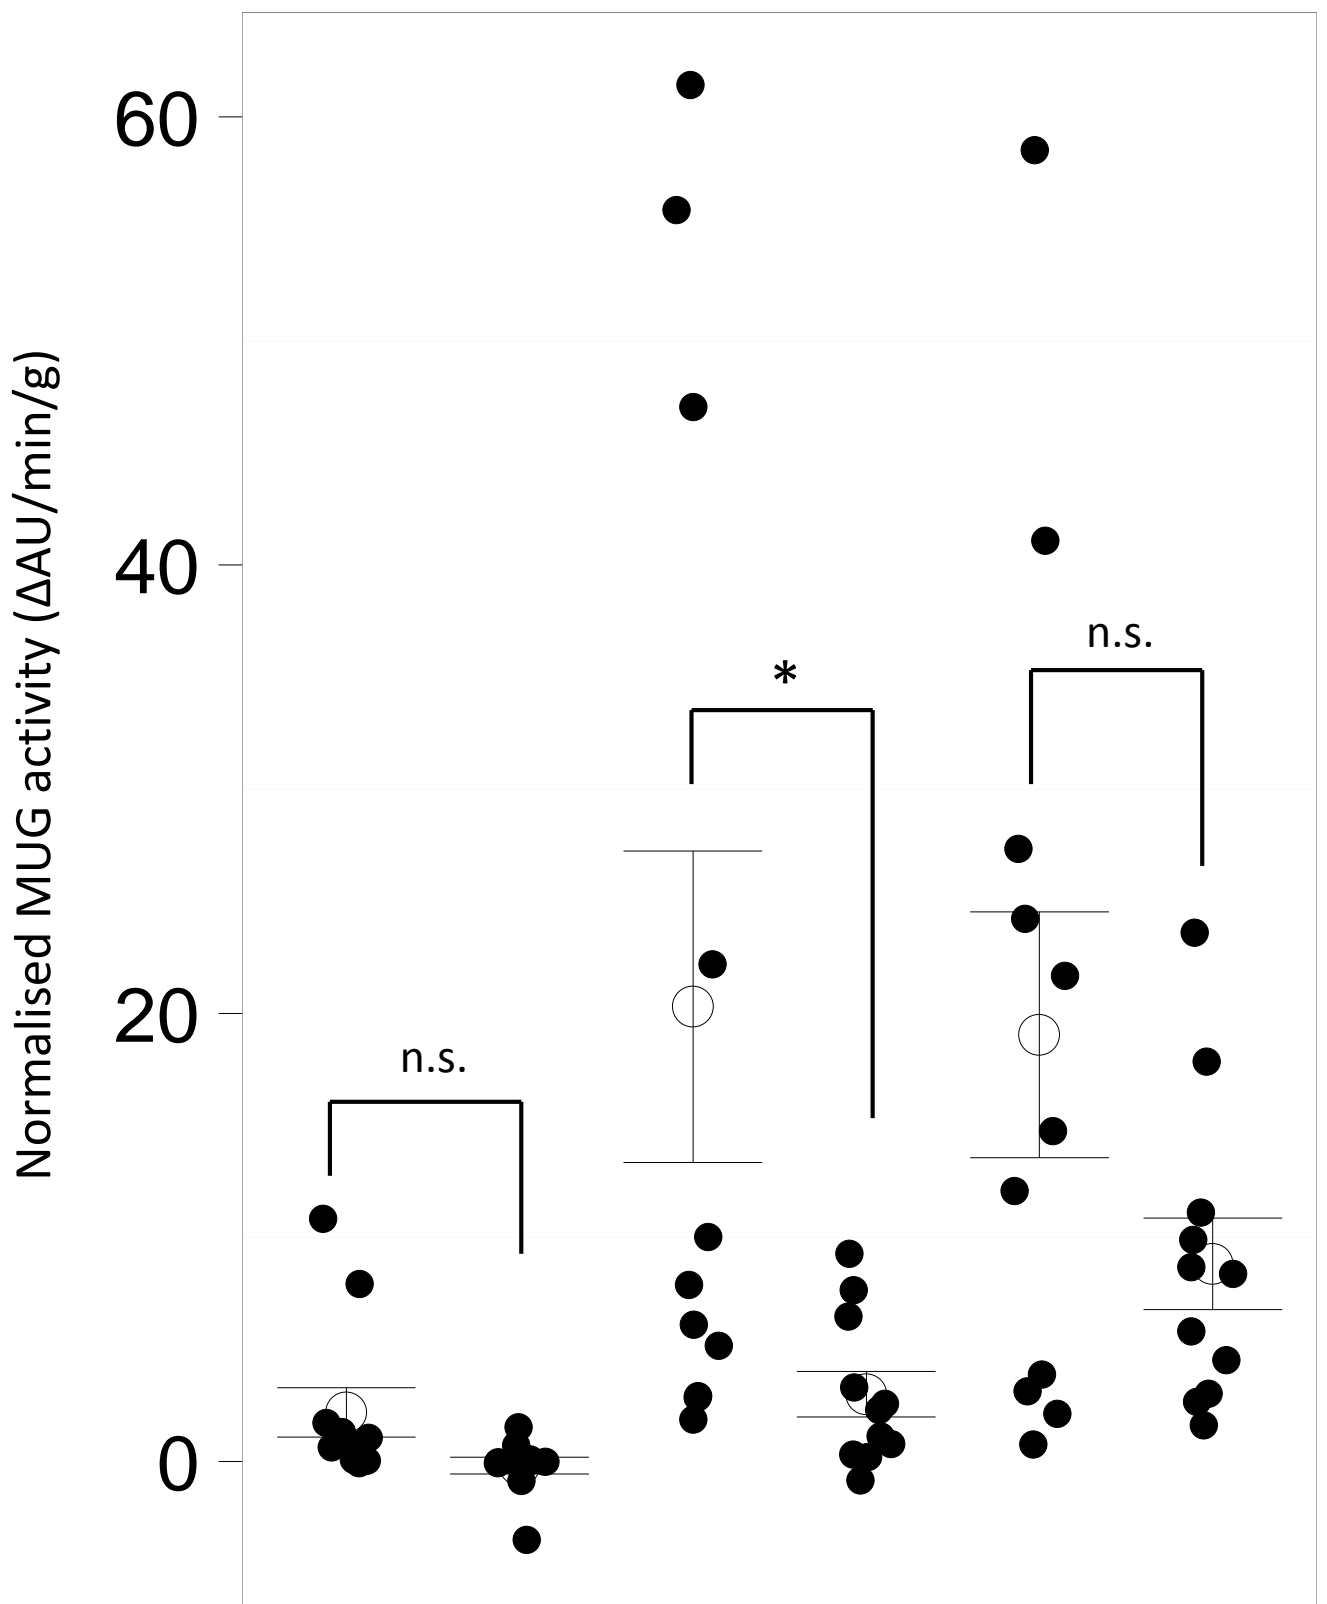

Plant treatment

Water

AlNc14

Water

AlNc14

Water

AlNc14

*B. cinerea* strain

B05.10

BcatrBp803GUS-7

OliCGUS
