# Supplementary material for: Albugo-imposed changes to tryptophan-derived antimicrobial metabolite biosynthesis may contribute to suppression of non-host resistance to Phytophthora infestans in Arabidopsis thaliana
Source: BMC Biol. 2017 Mar 20;15:20. doi: 10.1186/s12915-017-0360-z (PMC5358052; doi:10.1186/s12915-017-0360-z)
Supplement: Additional file 22: — Benzo-(1,2,3)-thiadiazole-7-carbothioic acid (BTH) regulated genes during Albugo infection time course. Spreadsheet showing the expression of Arabidopsis BTH regulated genes during infection with Albugo. (XLSX 346 kb) [file 12915_2017_360_MOESM22_ESM.xlsx]

## Sheet: Albugo_BTH_genes
					Log2 fold change															FDR
Type	Short_description	Curator_summary	Computational_description	Locus	AcNc02-Mock_0dpi.tab	AcNc02-Mock_2dpi.tab	AcNc02-Mock_4dpi.tab	AcNc02-Mock_6dpi.tab	AcNc02-Mock_8dpi.tab	AlNc14-Mock_0dpi.tab	AlNc14-Mock_2dpi.tab	AlNc14-Mock_4dpi.tab	AlNc14-Mock_6dpi.tab	AlNc14-Mock_8dpi.tab	BTH_Wang-data-BTH08hr.tab	BTH_Wang-data-BTH24hr.tab	JA_RikenGoda-data-MJ3hr.tab	JA_Pieterse-data-JA28hr.tab		FDR_AcNc02-Mock_0dpi.tab	FDR_AcNc02-Mock_2dpi.tab	FDR_AcNc02-Mock_4dpi.tab	FDR_AcNc02-Mock_6dpi.tab	FDR_AcNc02-Mock_8dpi.tab	FDR_AlNc14-Mock_0dpi.tab	FDR_AlNc14-Mock_2dpi.tab	FDR_AlNc14-Mock_4dpi.tab	FDR_AlNc14-Mock_6dpi.tab	FDR_AlNc14-Mock_8dpi.tab	FDR_BTH_Wang-data-BTH08hr.tab	FDR_BTH_Wang-data-BTH24hr.tab	FDR_JA_RikenGoda-data-MJ3hr.tab	FDR_JA_Pieterse-data-JA28hr.tab
protein_coding	plant defensin 1.2b	Predicted to encode a PR (pathogenesis-related) protein. Belongs to the plant defensin (PDF) family with the following members: At1g75830/PDF1.1, At5g44420/PDF1.2a, At2g26020/PDF1.2b, At5g44430/PDF1.2c, At2g26010/PDF1.3, At1g19610/PDF1.4, At1g55010/PDF1.5, At2g02120/PDF2.1, At2g02100/PDF2.2, At2g02130/PDF2.3, At1g61070/PDF2.4, At5g63660/PDF2.5, At2g02140/PDF2.6, At5g38330/PDF3.1 and At4g30070/PDF…	plant defensin 1.2b (PDF1.2b); FUNCTIONS IN: molecular_function unknown; INVOLVED IN: defense response; LOCATED IN: endomembrane system, cell wall; EXPRESSED IN: 8 plant structures; EXPRESSED DURING: 8 growth stages; CONTAINS InterPro DOMAIN/s: Gamma thionin (InterPro:IPR008176), Knottin (InterPro:IPR003614); BEST Arabidopsis thaliana protein match is: plant defensin 1.2C (TAIR:AT5G44430.1); Has …	AT2G26020	4.0493	6.53516	3.8368	5.30088	12.195	1.62218	3.32964	3.57565	5.32089	12.627	-1.4168	-1.72441	0.317867	2.8876		0.152141	3.52e-17	9.01e-06	2.62e-10	7.6e-33	1	0.00257248	1.37e-10	2.3e-17	1.26e-94	0.0234634	0.0125882	0.960195	0.001
protein_coding	UDP-Glycosyltransferase superfamily protein	NA	UDP-Glycosyltransferase superfamily protein; FUNCTIONS IN: transferase activity, transferring hexosyl groups, UDP-glycosyltransferase activity; INVOLVED IN: metabolic process; LOCATED IN: endomembrane system; EXPRESSED IN: 8 plant structures; EXPRESSED DURING: 4 anthesis, LP.02 two leaves visible, petal differentiation and expansion stage; CONTAINS InterPro DOMAIN/s: UDP-glucuronosyl/UDP-glucosyl…	AT3G11340	NE	NE	NE	7.50382	6.95451	NE	NE	4.70211	6.59479	6.18629	3.60573	2.57773	1.45406	0.690848		NA	NA	NA	2.8e-10	4.81e-30	NA	NA	2.4e-05	3.25e-10	5.74e-15	4.76e-05	0.00337824	0.119062	0.54062
protein_coding	pathogenesis-related gene 1	PR1 gene expression is induced in response to a variety of pathogens. It is a useful molecular marker for the SAR response. Though the Genbank record for the cDNA associated to this gene is called 'PR-1-like', the sequence actually corresponds to PR1. Expression of this gene is salicylic-acid responsive.	pathogenesis-related gene 1 (PR1); FUNCTIONS IN: molecular_function unknown; INVOLVED IN: response to vitamin B1, response to jasmonic acid stimulus, systemic acquired resistance, defense response; LOCATED IN: extracellular region, cell wall; EXPRESSED IN: 17 plant structures; EXPRESSED DURING: 9 growth stages; CONTAINS InterPro DOMAIN/s: Allergen V5/Tpx-1 related, conserved site (InterPro:IPR018…	AT2G14610	0.899775	1.20271	6.04478	5.61727	4.92893	1.57574	-2.41093	3.7589	-0.757189	-0.226484	4.98561	5.92005	0.359641	-0.895939		1	0.0752323	1.1e-07	2.63e-14	2.22e-26	1	0.23003	0.00219008	0.871333	0.572603	0	0	0.999644	0.595431
protein_coding	NIM1-interacting 1	NIMIN1 modulates PR gene expression according the following model: NPR1 forms a ternary complex with NIMIN1 and TGA factors upon SAR induction that binds to a positive regulatory cis-element of the PR-1 promoter, termed LS7. This leads to PR-1 gene induction. NIMIN1 decreases transcriptional activation, possibly through its EAR motif, which results in fine-tuning of PR-1 gene expression.	NIM1-interacting 1 (NIMIN1); FUNCTIONS IN: protein binding; INVOLVED IN: regulation of systemic acquired resistance, defense response to bacterium, negative regulation of transcription; LOCATED IN: nucleus; EXPRESSED IN: 20 plant structures; EXPRESSED DURING: 13 growth stages; BEST Arabidopsis thaliana protein match is: systemic acquired resistance (SAR) regulator protein NIMIN-1-related (TAIR:AT…	AT1G02450	5.38255	0.21174	0.18591	-0.165137	0.0948394	NE	-0.250444	-0.271892	-1.64318	-2.04861	4.71901	4.68223	-0.401403	-0.331576		0.0602525	0.87123	0.842032	0.96362	1	NA	1	1	0.0133927	0.000192515	0	0	0.9291	1.12588
protein_coding	NAC domain containing protein 16	NA	NAC domain containing protein 16 (NAC016); CONTAINS InterPro DOMAIN/s: No apical meristem (NAM) protein (InterPro:IPR003441); BEST Arabidopsis thaliana protein match is: NAC domain containing protein 17 (TAIR:AT1G34190.1); Has 2852 Blast hits to 2834 proteins in 75 species: Archae - 0; Bacteria - 0; Metazoa - 0; Fungi - 0; Plants - 2852; Viruses - 0; Other Eukaryotes - 0 (source: NCBI BLink).	AT1G34180	0.92384	-2.25986	-1.44784	-1.33272	0.227142	1.13372	-2.10465	-1.27255	-1.00979	0.28654	1.13711	2.10862	-0.044883	-0.134639		1	0.00119146	0.231003	0.0919151	0.892085	1	0.00295388	0.322943	0.206082	0.801634	0.0481717	0.00818152	1.02443	0.979217
protein_coding	Phosphoglycerate mutase family protein	NA	Phosphoglycerate mutase family protein; LOCATED IN: cellular_component unknown; EXPRESSED IN: 17 plant structures; EXPRESSED DURING: 10 growth stages; CONTAINS InterPro DOMAIN/s: Histidine phosphatase superfamily, clade-1 (InterPro:IPR013078), PRIB5 (InterPro:IPR012398); BEST Arabidopsis thaliana protein match is: Phosphoglycerate mutase family protein (TAIR:AT3G60440.1).	AT3G60420	1.03495	0.0202344	0.501648	0.423531	1.12239	0.143778	-0.693541	-0.406657	-0.315202	0.0928676	0.0510961	-0.156599	-0.115814	-0.145537		1	0.976258	0.503102	0.516659	0.000293877	1	0.363017	0.621306	1	0.808503	1.17486	1.20787	1.06471	0.979033
protein_coding	S-locus lectin protein kinase family protein	NA	S-locus lectin protein kinase family protein; FUNCTIONS IN: in 6 functions; INVOLVED IN: protein amino acid phosphorylation, recognition of pollen; LOCATED IN: plasma membrane; EXPRESSED IN: 21 plant structures; EXPRESSED DURING: 13 growth stages; CONTAINS InterPro DOMAIN/s: Curculin-like (mannose-binding) lectin (InterPro:IPR001480), Apple-like (InterPro:IPR003609), PAN-2 domain (InterPro:IPR013…	AT1G11330	0.130422	1.11891	0.902246	1.065	1.35616	-1.76464	0.209832	-0.0722321	-0.750151	0.0613331	1.63192	1.61906	-0.174411	-0.155004		1	0.0371069	0.316721	0.0957852	0.000224422	1	0.908766	0.952224	0.723062	1	0.0113046	0.026084	1.09802	1.03136
protein_coding	farnesoic acid carboxyl-O-methyltransferase	Encodes a farnesoic acid carboxyl-O-methyltransferase.	farnesoic acid carboxyl-O-methyltransferase (FAMT); FUNCTIONS IN: S-adenosylmethionine-dependent methyltransferase activity, farnesoic acid O-methyltransferase activity; INVOLVED IN: biological_process unknown; LOCATED IN: cellular_component unknown; EXPRESSED IN: leaf; EXPRESSED DURING: seedling growth; CONTAINS InterPro DOMAIN/s: SAM dependent carboxyl methyltransferase (InterPro:IPR005299); BE…	AT3G44860	0.875645	0.580852	0.0804854	0.666849	0.5947	-0.601079	-0.0458214	-0.70177	-0.769625	-0.946218	1.45679	0.762322	4.98731	2.1802		1	0.356632	0.919548	0.257778	0.0230558	1	1	0.541094	0.716335	0.00547294	0.0359248	0.295453	0.003	0.00338095
protein_coding	NA	NA	unknown protein; BEST Arabidopsis thaliana protein match is: unknown protein (TAIR:AT4G26960.1); Has 1807 Blast hits to 1807 proteins in 277 species: Archae - 0; Bacteria - 0; Metazoa - 736; Fungi - 347; Plants - 385; Viruses - 0; Other Eukaryotes - 339 (source: NCBI BLink).	AT5G54970	0.466226	-0.365206	0.204123	0.532113	1.07454	-1.01523	-0.151779	-0.0867298	-0.835942	-1.17942	1.48187	1.4796	0.715014	0.15027		1	0.347917	0.890133	0.417328	3.76e-05	1	0.940491	0.925426	0.16275	0.00425785	0.0227077	0.0405675	0.35022	1.21571
protein_coding	Histone superfamily protein	NA	Histone superfamily protein; FUNCTIONS IN: DNA binding; INVOLVED IN: nucleosome assembly; LOCATED IN: chloroplast, nucleosome; EXPRESSED IN: 24 plant structures; EXPRESSED DURING: 15 growth stages; CONTAINS InterPro DOMAIN/s: Histone H3 (InterPro:IPR000164), Histone-fold (InterPro:IPR009072), Histone core (InterPro:IPR007125); BEST Arabidopsis thaliana protein match is: Histone superfamily protei…	AT1G09200	-0.0614323	-0.397466	0.711759	-0.0873805	-0.168327	-0.167597	-0.535322	0.814015	-0.915787	-1.42188	0.345982	1.48831	-0.100554	0.115649		1	0.500507	0.25002	0.911469	0.7339	1	0.587778	0.1685	0.00310368	1.48e-07	0.68089	0.044013	1.06708	1.2011
protein_coding	Purple acid phosphatases superfamily protein	NA	Purple acid phosphatases superfamily protein; FUNCTIONS IN: hydrolase activity, protein serine/threonine phosphatase activity, metal ion binding, acid phosphatase activity; INVOLVED IN: biological_process unknown; LOCATED IN: endomembrane system; EXPRESSED IN: 21 plant structures; EXPRESSED DURING: 13 growth stages; CONTAINS InterPro DOMAIN/s: Purple acid phosphatase, N-terminal (InterPro:IPR0159…	AT1G13750	0.261937	1.32232	0.800052	0.504635	0.394265	-0.308057	0.665822	-0.074974	-1.50258	-2.08752	1.46573	1.17697	-0.593294	-0.409774		1	0.0481412	0.246053	0.465054	0.473451	1	0.776519	0.999629	0.145745	9.1e-05	0.0189024	0.0763821	0.640465	1.13908
protein_coding	Disease resistance protein (TIR-NBS-LRR class) family	NA	Disease resistance protein (TIR-NBS-LRR class) family; FUNCTIONS IN: transmembrane receptor activity, ATP binding; INVOLVED IN: signal transduction, defense response, apoptosis, innate immune response; LOCATED IN: intrinsic to membrane; EXPRESSED IN: 19 plant structures; EXPRESSED DURING: 13 growth stages; CONTAINS InterPro DOMAIN/s: NB-ARC (InterPro:IPR002182), Toll-Interleukin receptor (InterPr…	AT5G36930	-0.173625	0.458024	0.000620423	0.196572	-0.218079	0.465651	0.122405	-0.549278	-0.593034	-1.87982	1.04525	1.31653	-0.211136	-0.599265		1	0.463672	0.993827	0.984796	0.813565	1	0.947725	0.766593	0.335224	0.000175565	0.0631182	0.0489108	1.09873	1.12468
protein_coding	receptor kinase 3	encodes a putative receptor-like serine/threonine protein kinases that is similar to Brassica self-incompatibility (S) locus. Expressed in root. Shoot expression limited to limited to the root-hypocotyl transition zone and at the base of lateral roots as well as in axillary buds, and pedicels.	receptor kinase 3 (RK3); FUNCTIONS IN: transmembrane receptor protein serine/threonine kinase activity, kinase activity; INVOLVED IN: protein amino acid phosphorylation, recognition of pollen; LOCATED IN: plasma membrane, vacuole; EXPRESSED IN: 15 plant structures; EXPRESSED DURING: 12 growth stages; CONTAINS InterPro DOMAIN/s: Curculin-like (mannose-binding) lectin (InterPro:IPR001480), Protein …	AT4G21380	1.60069	0.397163	0.0666622	-0.0616031	0.288013	0.234613	-0.623871	-1.06833	-1.71207	-1.42454	1.38946	1.70557	0.295004	-0.630217		1	0.525529	1	1	0.469173	1	0.624246	0.225582	0.0549767	0.000622926	0.0255668	0.0218779	1.12693	0.995638
protein_coding	toll/interleukin-1 receptor-like	Toll/interleukin-1 receptor-like protein (TIR) mRNA,	toll/interleukin-1 receptor-like (TIR); FUNCTIONS IN: transmembrane receptor activity; INVOLVED IN: signal transduction, defense response, innate immune response; LOCATED IN: intrinsic to membrane; CONTAINS InterPro DOMAIN/s: Toll-Interleukin receptor (InterPro:IPR000157); BEST Arabidopsis thaliana protein match is: Toll-Interleukin-Resistance (TIR) domain-containing protein (TAIR:AT1G72910.1); H…	AT1G72930	0.937204	0.314753	-0.143064	-0.284828	-0.535144	0.237482	-0.0202864	-0.577152	-1.18956	-1.31458	1.38491	1.70146	-0.814868	0.122397		1	0.768343	0.915562	0.651175	0.000951192	1	1	0.499234	2.99e-05	1.29e-14	0.023509	0.0214048	0.313771	1.20161
protein_coding	zinc transporter 11 precursor	member of Putative zinc transporter ZIP2 - like family	zinc transporter 11 precursor (ZIP11); FUNCTIONS IN: cation transmembrane transporter activity, metal ion transmembrane transporter activity; INVOLVED IN: cation transport, metal ion transport, transmembrane transport; LOCATED IN: endomembrane system, membrane; EXPRESSED IN: 22 plant structures; EXPRESSED DURING: 13 growth stages; CONTAINS InterPro DOMAIN/s: Zinc/iron permease (InterPro:IPR003689…	AT1G55910	0.490147	0.0206366	0.000169222	-0.307889	-0.189634	0.0845002	-0.367286	-1.00223	-1.20531	-0.773506	1.7217	1.44562	-1.04684	-0.378304		1	0.955315	1	0.654279	0.49701	1	0.83637	0.13299	0.000980096	0.00998963	0.00845818	0.0370177	0.160127	1.01892
protein_coding	Toll-Interleukin-Resistance (TIR) domain-containing protein	NA	Toll-Interleukin-Resistance (TIR) domain-containing protein; FUNCTIONS IN: transmembrane receptor activity, ATP binding; INVOLVED IN: signal transduction, defense response, apoptosis, innate immune response; LOCATED IN: intrinsic to membrane; CONTAINS InterPro DOMAIN/s: NB-ARC (InterPro:IPR002182), Toll-Interleukin receptor (InterPro:IPR000157); BEST Arabidopsis thaliana protein match is: Toll-In…	AT1G72910	2.02411	0.691984	-0.403259	-0.108026	-0.145343	0.554621	0.269171	-0.706107	-1.19838	-1.57033	1.38491	1.70146	-0.814868	0.122397		0.491539	0.298471	0.913944	0.988373	0.836098	1	0.877119	0.466847	0.0447987	0.000416952	0.023509	0.0214048	0.313771	1.20161
protein_coding	WRKY DNA-binding protein 54	member of WRKY Transcription Factor; Group III	WRKY DNA-binding protein 54 (WRKY54); CONTAINS InterPro DOMAIN/s: DNA-binding WRKY (InterPro:IPR003657); BEST Arabidopsis thaliana protein match is: WRKY DNA-binding protein 70 (TAIR:AT3G56400.1); Has 3183 Blast hits to 2752 proteins in 165 species: Archae - 0; Bacteria - 0; Metazoa - 0; Fungi - 0; Plants - 3171; Viruses - 0; Other Eukaryotes - 12 (source: NCBI BLink).	AT2G40750	2.27551	0.739456	-0.643674	0.123717	-0.229629	1.1583	0.354282	-1.23402	-1.35236	-1.64231	1.74581	1.48169	-0.631534	0.33037		1	0.22792	0.479058	0.944161	0.537523	1	0.849076	0.0493951	0.00126731	5.86e-08	0.00847826	0.0351727	0.519842	1.14552
protein_coding	Protein of unknown function (DUF962)	NA	Protein of unknown function (DUF962); CONTAINS InterPro DOMAIN/s: Protein of unknown function DUF962 (InterPro:IPR009305); BEST Arabidopsis thaliana protein match is: Protein of unknown function (DUF962) (TAIR:AT1G18720.1); Has 608 Blast hits to 608 proteins in 290 species: Archae - 0; Bacteria - 318; Metazoa - 3; Fungi - 143; Plants - 86; Viruses - 0; Other Eukaryotes - 58 (source: NCBI BLink).	AT1G74440	1.82555	1.69776	0.40146	-0.138969	0.410083	1.33336	0.74263	-0.82558	-2.06043	-1.27572	1.5742	1.63052	-0.270284	-0.406012		1	0.000467806	0.693245	0.871519	0.377206	1	0.623993	0.543017	0.00176987	0.000386596	0.0133833	0.0258895	1.08637	1.15749
protein_coding	Leucine-rich repeat protein kinase family protein	NA	Leucine-rich repeat protein kinase family protein; FUNCTIONS IN: kinase activity; INVOLVED IN: protein amino acid phosphorylation; LOCATED IN: endomembrane system; EXPRESSED IN: 17 plant structures; EXPRESSED DURING: 13 growth stages; CONTAINS InterPro DOMAIN/s: Protein kinase, ATP binding site (InterPro:IPR017441), Protein kinase, catalytic domain (InterPro:IPR000719), Leucine-rich repeat (Inter…	AT5G59670	0.879603	0.411172	-0.00163933	0.250551	0.200907	-0.358005	-0.293345	-0.839661	-1.52698	-1.30939	1.35913	1.88475	-0.213077	-0.141061		1	0.479285	1	0.745839	0.610105	1	0.896382	0.532165	0.0326739	1.36e-05	0.0248736	0.0135503	1.10135	0.988312
protein_coding	receptor-like protein kinase 1	Encodes a receptor-like protein kinase.	receptor-like protein kinase 1 (RLK1); FUNCTIONS IN: in 6 functions; INVOLVED IN: protein amino acid phosphorylation; LOCATED IN: endomembrane system; EXPRESSED IN: 23 plant structures; EXPRESSED DURING: 13 growth stages; CONTAINS InterPro DOMAIN/s: Curculin-like (mannose-binding) lectin (InterPro:IPR001480), Protein kinase, ATP binding site (InterPro:IPR017441), Serine/threonine-protein kinase d…	AT5G60900	0.451587	-0.429897	-0.130319	0.877878	0.651489	-2.2421	-1.12269	-1.15175	-0.849179	-1.06128	1.70126	1.95722	0.0664049	-0.176652		1	0.679822	1	0.174326	0.0785462	1	0.13545	0.343853	0.670449	0.00594633	0.00968475	0.0115014	1.15351	1.16191
protein_coding	Leucine-rich repeat transmembrane protein kinase	NA	Leucine-rich repeat transmembrane protein kinase; FUNCTIONS IN: kinase activity; INVOLVED IN: protein amino acid phosphorylation; CONTAINS InterPro DOMAIN/s: Protein kinase, ATP binding site (InterPro:IPR017441), Serine/threonine-protein kinase domain (InterPro:IPR002290), Leucine-rich repeat (InterPro:IPR001611), Serine-threonine/tyrosine-protein kinase (InterPro:IPR001245), Protein kinase-like …	AT1G56120	0.906422	0.880502	0.275323	1.04249	1.48481	-1.24236	-0.187299	-0.708813	-1.83808	-1.03973	1.98066	2.4844	-0.337752	0.169615		1	0.0790395	0.805883	0.127586	1.93e-05	1	1	0.602054	0.00150411	0.0494621	0.00443284	0.003925	1.0411	1.18371
protein_coding	P-loop containing nucleoside triphosphate hydrolases superfamily protein	NA	P-loop containing nucleoside triphosphate hydrolases superfamily protein; FUNCTIONS IN: nucleoside-triphosphatase activity, ATPase activity, nucleotide binding, ATP binding; EXPRESSED IN: 11 plant structures; EXPRESSED DURING: 9 growth stages; CONTAINS InterPro DOMAIN/s: ATPase, AAA-type, core (InterPro:IPR003959), ATPase, AAA+ type, core (InterPro:IPR003593); BEST Arabidopsis thaliana protein ma…	AT3G28540	-0.253118	-0.200282	0.793243	1.29504	1.52477	-1.1608	-0.702645	-0.470059	-0.965395	-1.06856	2.77173	3.41931	-0.745618	-0.091464		1	0.986314	0.424643	0.0223564	0.000365574	1	0.588339	0.666534	0.214596	0.0114113	0.000546667	0.000511905	0.473973	1.00015
protein_coding	alpha/beta-Hydrolases superfamily protein	Encodes a lipase-like gene that is important for salicylic acid signaling and function in resistance (R) gene-mediated and basal plant disease resistance. PAD4 can interact directly with EDS1, another disease resistance signaling protein. Expressed at elevated level in response to green peach aphid (GPA) feeding, and modulates the GPA feeding-induced leaf senescence through a mechanism that doesn…	PHYTOALEXIN DEFICIENT 4 (PAD4); CONTAINS InterPro DOMAIN/s: Lipase, class 3 (InterPro:IPR002921); BEST Arabidopsis thaliana protein match is: senescence-associated gene 101 (TAIR:AT5G14930.2); Has 722 Blast hits to 622 proteins in 73 species: Archae - 0; Bacteria - 23; Metazoa - 17; Fungi - 11; Plants - 620; Viruses - 1; Other Eukaryotes - 50 (source: NCBI BLink).	AT3G52430	-0.156855	0.0684492	0.97212	0.93804	1.51931	-0.564715	-0.950559	-0.223342	-0.605437	0.188694	2.04115	3.41272	-0.247006	0.0526622		1	1	0.103822	0.323654	0.00108993	1	0.41499	0.994974	0.61403	1	0.00384574	0.000506024	1.08249	1.20078
protein_coding	Chitinase family protein	NA	Chitinase family protein; FUNCTIONS IN: chitinase activity; INVOLVED IN: carbohydrate metabolic process, cell wall macromolecule catabolic process; LOCATED IN: cell wall; EXPRESSED IN: 18 plant structures; EXPRESSED DURING: 13 growth stages; CONTAINS InterPro DOMAIN/s: Glycoside hydrolase, family 19 (InterPro:IPR016283), Glycoside hydrolase, family 19, catalytic (InterPro:IPR000726); BEST Arabido…	AT4G01700	0.199293	0.352676	0.970525	0.643468	0.265711	-0.347103	-0.402443	0.232129	-0.529011	-1.03855	3.25691	3.31281	-0.316959	-0.0557882		1	0.590974	0.131928	0.270126	0.511319	1	0.766255	0.608748	0.478321	0.00444189	0.000111111	0.000760417	0.975819	1.15318
protein_coding	ankyrin	Induced in response to Salicylic acid. Belongs to the ankyrin repeat protein family.	ankyrin (ANK); CONTAINS InterPro DOMAIN/s: Ankyrin repeat-containing domain (InterPro:IPR020683), Ankyrin repeat (InterPro:IPR002110); BEST Arabidopsis thaliana protein match is: Ankyrin repeat family protein (TAIR:AT5G54620.1); Has 16763 Blast hits to 8871 proteins in 442 species: Archae - 14; Bacteria - 1401; Metazoa - 8955; Fungi - 670; Plants - 1865; Viruses - 65; Other Eukaryotes - 3793 (sou…	AT5G54610	4.41338	1.27982	0.634544	0.424454	0.217634	2.50864	0.614734	-0.288077	-3.155	-2.38718	2.69318	2.42173	-0.730248	-0.618572		0.082971	0.0129406	0.566709	0.688551	0.868621	1	0.647567	0.920434	2.88e-15	7.84e-08	0.000617978	0.00472247	0.373771	0.617389
protein_coding	sigma factor binding protein 1	Sig1 binding protein; interacts with Sig1R4. As well as Sig1, SibI is imported into chloroplasts and its expression is light-dependent in mature chloroplasts.	sigma factor binding protein 1 (SIB1); CONTAINS InterPro DOMAIN/s: VQ (InterPro:IPR008889); BEST Arabidopsis thaliana protein match is: VQ motif-containing protein (TAIR:AT2G41180.1); Has 66 Blast hits to 66 proteins in 11 species: Archae - 0; Bacteria - 0; Metazoa - 0; Fungi - 0; Plants - 66; Viruses - 0; Other Eukaryotes - 0 (source: NCBI BLink).	AT3G56710	4.0891	0.981903	0.173803	0.454647	-0.0700035	1.43931	0.139906	-0.838623	-1.23015	-1.46734	2.45501	2.29315	-0.00930771	0.617305		0.0146472	0.128984	0.8612	0.358902	0.929428	1	1	0.340983	0.0535239	1.2e-08	0.00132203	0.0058189	1.02886	0.813567
protein_coding	Legume lectin family protein	NA	Legume lectin family protein; FUNCTIONS IN: carbohydrate binding, binding; INVOLVED IN: biological_process unknown; LOCATED IN: apoplast, cell wall, chloroplast; EXPRESSED IN: 19 plant structures; EXPRESSED DURING: 12 growth stages; CONTAINS InterPro DOMAIN/s: Legume lectin, beta chain (InterPro:IPR001220), Concanavalin A-like lectin/glucanase, subgroup (InterPro:IPR013320), Concanavalin A-like l…	AT5G03350	3.74472	1.78317	1.97326	1.48494	1.69555	0.712455	0.307436	0.588455	-1.5943	-1.17284	2.6251	2.46362	-0.257713	0.555831		0.0489208	0.000135921	0.0074545	0.00123703	1.22e-11	1	0.933078	0.605947	0.0130007	0.000974441	0.000885417	0.00439091	0.994978	0.778831
protein_coding	cell wall-associated kinase	cell wall-associated kinase, may function as a signaling receptor of extracellular matrix component such as oligogalacturonides.	cell wall-associated kinase (WAK1); FUNCTIONS IN: kinase activity; INVOLVED IN: cell surface receptor linked signaling pathway, response to virus, defense response to fungus, response to salicylic acid stimulus; LOCATED IN: plasma membrane, vacuole, plant-type cell wall; EXPRESSED IN: 21 plant structures; EXPRESSED DURING: 13 growth stages; CONTAINS InterPro DOMAIN/s: EGF-like calcium-binding (In…	AT1G21250	3.46655	1.02129	1.25494	0.757211	1.09687	0.296262	-0.25799	-0.195032	-1.7917	-0.962961	1.25494	1.40829	-0.648181	-0.0829169		0.0344367	0.0773233	0.133706	0.303212	0.00385627	1	0.849647	0.965751	0.0133927	0.0585291	0.0386945	0.0438594	0.521601	1.14284
protein_coding	WRKY DNA-binding protein 70	member of WRKY Transcription Factor; Group III. Function as activator of SA-dependent defense genes and a repressor of JA-regulated genes. WRKY70-controlled suppression of JA-signaling is partly executed by NPR1.	WRKY DNA-binding protein 70 (WRKY70); CONTAINS InterPro DOMAIN/s: DNA-binding WRKY (InterPro:IPR003657); BEST Arabidopsis thaliana protein match is: WRKY DNA-binding protein 54 (TAIR:AT2G40750.1); Has 3203 Blast hits to 2772 proteins in 182 species: Archae - 0; Bacteria - 0; Metazoa - 0; Fungi - 0; Plants - 3190; Viruses - 0; Other Eukaryotes - 13 (source: NCBI BLink).	AT3G56400	2.68244	0.509864	0.482906	0.580595	0.433264	0.562549	-0.0558159	-0.564987	-1.14029	-0.816112	1.41631	1.31791	-0.425544	0.494651		0.0801909	0.460016	0.604387	0.245702	0.198089	1	0.984313	0.645143	0.0800844	0.00998963	0.0213868	0.0518349	0.92156	1.0115
protein_coding	NA	NA	unknown protein; FUNCTIONS IN: molecular_function unknown; INVOLVED IN: biological_process unknown; LOCATED IN: endomembrane system; EXPRESSED IN: 10 plant structures; EXPRESSED DURING: 10 growth stages; CONTAINS InterPro DOMAIN/s: Protein of unknown function DUF677 (InterPro:IPR007749); BEST Arabidopsis thaliana protein match is: Protein of unknown function (DUF677) (TAIR:AT5G66670.2); Has 42 Bl…	AT3G48640	2.79833	1.03285	0.410185	0.488979	0.408701	1.43848	0.257367	-0.800507	-1.43734	-1.37066	2.3894	3.46796	-0.186229	0.189283		0.0307235	0.0397971	0.739544	0.404944	0.244845	1	0.847145	0.479674	0.000179677	3.21e-05	0.00147155	0.00047561	1.09942	1.19954
protein_coding	thioredoxin H-type 5	encodes a cytosolic thioredoxin that reduces disulfide bridges of target proteins by the reversible formation of a disulfide bridge between two neighboring Cys residues present in the active site. Thioredoxins have been found to regulate a variety of biological reactions in prokaryotic and eukaryotic cells.	thioredoxin H-type 5 (TRX5); FUNCTIONS IN: oxidoreductase activity, acting on sulfur group of donors, disulfide as acceptor; INVOLVED IN: response to oxidative stress, response to cadmium ion, defense response to fungus, response to microbial phytotoxin; LOCATED IN: cytosol, plasma membrane; EXPRESSED IN: 25 plant structures; EXPRESSED DURING: 15 growth stages; CONTAINS InterPro DOMAIN/s: Thiored…	AT1G45145	1.82947	0.543608	0.798358	0.829647	1.00823	0.472062	0.196138	0.229983	-0.918574	-0.538542	2.28512	2.35117	0.715892	0.777056		0.841904	0.42768	0.369323	0.202161	1.67e-05	1	0.938371	0.708179	0.319424	0.0498812	0.00202899	0.00519231	0.541761	0.320801
protein_coding	Leucine-rich repeat protein kinase family protein	Encodes a putative leucine rich repeat transmembrane protein that is expressed in response to Pseudomonas syringae. Expression of SRRLK may be required for silencing via lsiRNAs. Regulates cell death and innate immunity.	SUPPRESSOR OF BIR1 1 (SOBIR1); FUNCTIONS IN: protein serine/threonine kinase activity, kinase activity, ATP binding; INVOLVED IN: protein amino acid phosphorylation, transmembrane receptor protein tyrosine kinase signaling pathway, positive regulation of defense response, negative regulation of floral organ abscission, positive regulation of cell death; LOCATED IN: plasma membrane; EXPRESSED IN: …	AT2G31880	1.09525	0.556482	0.557644	0.871099	1.00616	0.0974882	-0.367126	-0.740625	-0.162261	-0.0351251	2.19314	2.64831	-0.819985	0.0766833		1	0.267523	0.458174	0.075029	0.00149388	1	0.831805	0.560473	1	1	0.00260667	0.00301734	0.33195	1.18195
protein_coding	calreticulin 3	Encodes one of three Arabidopsis calreticulins. In CRT-deficient mouse fibroblasts, this protein restores ER Ca2+ levels. Non-receptor component required for EFR-mediated immunity. Mutants show de-repressed anthocyanin accumulation in the presence of elf18, and EFR accumulation and signalling.	calreticulin 3 (CRT3); FUNCTIONS IN: unfolded protein binding, calcium ion binding; INVOLVED IN: in 6 processes; LOCATED IN: endoplasmic reticulum, endoplasmic reticulum membrane; EXPRESSED IN: 23 plant structures; EXPRESSED DURING: 13 growth stages; CONTAINS InterPro DOMAIN/s: Calreticulin/calnexin, P (InterPro:IPR009033), Calreticulin/calnexin (InterPro:IPR001580), Calreticulin/calnexin, conser…	AT1G08450	0.963919	0.86422	0.762989	1.21153	1.67574	0.370413	0.12712	-0.0708815	0.346375	0.188103	2.46773	2.95768	-0.31892	-0.3849		1	0.023613	0.22672	0.00309788	2.83e-12	1	0.984943	0.953838	0.346716	0.703804	0.00123684	0.00136434	1.05655	1.09821
protein_coding	Calmodulin binding protein-like	NA	Calmodulin binding protein-like; CONTAINS InterPro DOMAIN/s: Calmodulin binding protein-like (InterPro:IPR012416); BEST Arabidopsis thaliana protein match is: Calmodulin-binding protein (TAIR:AT5G57580.1); Has 30201 Blast hits to 17322 proteins in 780 species: Archae - 12; Bacteria - 1396; Metazoa - 17338; Fungi - 3422; Plants - 5037; Viruses - 0; Other Eukaryotes - 2996 (source: NCBI BLink).	AT1G73805	1.19535	1.20135	1.00818	1.35183	1.46584	1.45098	0.405462	-0.316925	-0.441875	-0.226906	2.69101	3.2363	-0.342406	-0.640732		1	0.0762996	0.32982	0.078863	0.000102552	1	0.888646	0.797147	0.633823	0.893262	0.000625	0.00084	0.976695	0.930659
protein_coding	PLANT CADMIUM RESISTANCE 1	NA	PLANT CADMIUM RESISTANCE 1 (PCR1); FUNCTIONS IN: molecular_function unknown; INVOLVED IN: biological_process unknown; LOCATED IN: vacuole; CONTAINS InterPro DOMAIN/s: Protein of unknown function Cys-rich (InterPro:IPR006461); BEST Arabidopsis thaliana protein match is: PLANT CADMIUM RESISTANCE 2 (TAIR:AT1G14870.1); Has 778 Blast hits to 777 proteins in 111 species: Archae - 0; Bacteria - 0; Metaz…	AT1G14880	1.80771	0.61566	1.39905	0.568891	1.33318	1.51223	-0.331398	-0.437141	-2.90376	-1.80607	2.19764	2.28655	0.337428	-0.246595		1	0.42779	0.118431	0.38039	1.06e-06	1	0.897365	0.8399	9.12e-11	2.17e-10	0.00263158	0.00590661	1.07228	1.04238
protein_coding	Disease resistance protein (TIR-NBS-LRR class) family	Confers resistance to Peronospora parasitica. RPP4 is coordinately regulated by transcriptional activation and RNA silencing.	recognition of peronospora parasitica 4 (RPP4); FUNCTIONS IN: LRR domain binding; INVOLVED IN: defense response to fungus, incompatible interaction, defense response; LOCATED IN: intrinsic to membrane; EXPRESSED IN: 22 plant structures; EXPRESSED DURING: 15 growth stages; CONTAINS InterPro DOMAIN/s: NB-ARC (InterPro:IPR002182), Leucine-rich repeat (InterPro:IPR001611), Disease resistance protein …	AT4G16860	-0.611734	-0.535896	-1.41889	-0.356881	-0.292182	-0.624014	0.047629	-1.29183	-0.422697	0.390087	0.650483	1.5111	-0.494482	-0.582155		1	0.455966	0.00621193	0.701735	0.871841	1	0.964114	0.0136687	0.607948	0.845283	0.356662	0.031665	0.737108	1.12779
protein_coding	photosystem II reaction center protein A	Encodes chlorophyll binding protein D1, a part of the photosystem II reaction center core	photosystem II reaction center protein A (PSBA); FUNCTIONS IN: chlorophyll binding; INVOLVED IN: photosynthesis, light reaction; LOCATED IN: in 6 components; EXPRESSED IN: 24 plant structures; EXPRESSED DURING: 14 growth stages; CONTAINS InterPro DOMAIN/s: Photosystem II reaction centre protein PsbA/D1 (InterPro:IPR005867), Photosynthetic reaction centre, L/M (InterPro:IPR000484); BEST Arabidopsi…	ATCG00020	0.569855	0.403014	-1.30056	-1.40711	-0.489963	0.420551	0.675652	-1.11177	-1.54813	-0.440657	2.14389	1.467	-0.157965	-0.105375		1	0.585549	0.0661819	1e-05	0.537757	1	0.744269	0.0734502	7.73e-08	0.631809	0.004	0.0582195	1.07063	0.975393
protein_coding	nodulin MtN21 /EamA-like transporter family protein	NA	nodulin MtN21 /EamA-like transporter family protein; LOCATED IN: membrane; EXPRESSED IN: 13 plant structures; EXPRESSED DURING: 7 growth stages; CONTAINS InterPro DOMAIN/s: Protein of unknown function DUF6, transmembrane (InterPro:IPR000620); BEST Arabidopsis thaliana protein match is: nodulin MtN21 /EamA-like transporter family protein (TAIR:AT1G44800.1); Has 3616 Blast hits to 3605 proteins in …	AT4G08300	-0.508467	0.959717	-0.84137	-0.662333	-1.21787	-0.278292	0.529475	-0.611432	-2.65163	-3.21335	0.818377	1.45812	-0.843246	-0.39899		1	0.379537	0.321146	0.619494	0.220846	1	0.851521	0.633338	0.0021005	0.00972314	0.211685	0.0413885	0.268801	1.15146
protein_coding	acireductone dioxygenase 3	Encodes a protein predicted to belong to the acireductone dioxygenase (ARD/ARDÃƒâ€ )family.	acireductone dioxygenase 3 (ARD3); FUNCTIONS IN: heteroglycan binding, acireductone dioxygenase [iron(II)-requiring] activity, metal ion binding; INVOLVED IN: oxidation reduction, L-methionine salvage from methylthioadenosine; LOCATED IN: cellular_component unknown; EXPRESSED IN: 22 plant structures; EXPRESSED DURING: 13 growth stages; CONTAINS InterPro DOMAIN/s: Acireductone dioxygenase, ARD (In…	AT2G26400	NE	0.749645	4.23404	3.29873	3.96639	NE	NE	2.93213	-0.117911	1.24752	3.11485	4.41519	-0.000225831	0.0028363		NA	0.752992	1.5e-05	0.000241657	3.67e-12	NA	NA	0.00649981	1	0.470742	0.000162791	4.55e-05	1.01617	1.03077
protein_coding	metacaspase 2	NA	metacaspase 2 (MC2); FUNCTIONS IN: cysteine-type endopeptidase activity; INVOLVED IN: proteolysis; EXPRESSED IN: 7 plant structures; EXPRESSED DURING: 8 growth stages; CONTAINS InterPro DOMAIN/s: Zinc finger, LSD1-type (InterPro:IPR005735), Peptidase C14, caspase catalytic (InterPro:IPR011600); BEST Arabidopsis thaliana protein match is: metacaspase 1 (TAIR:AT1G02170.1); Has 35333 Blast hits to 3…	AT4G25110	0.905662	3.83816	2.90506	4.12886	2.4253	0.623919	NE	0.613244	1.69203	0.149324	2.44884	2.64768	-0.423314	-0.306624		1	0.000155176	0.000223058	3.07e-05	7.41e-06	1	NA	0.584115	0.635193	0.961037	0.00126957	0.00294083	0.922653	1.15675
protein_coding	cysteine-rich RLK (RECEPTOR-like protein kinase) 6	Arabidopsis thaliana receptor-like protein kinase. Naming convention from Chen et al 2003 (PMID 14756307)	cysteine-rich RLK (RECEPTOR-like protein kinase) 6 (CRK6); FUNCTIONS IN: kinase activity; INVOLVED IN: protein amino acid phosphorylation; LOCATED IN: plasma membrane; CONTAINS InterPro DOMAIN/s: Protein kinase, ATP binding site (InterPro:IPR017441), Protein kinase, catalytic domain (InterPro:IPR000719), Protein of unknown function DUF26 (InterPro:IPR002902), Serine-threonine/tyrosine-protein kin…	AT4G23140	1.84709	2.50124	1.61002	4.18467	1.40595	1.35392	0.913675	-0.465895	3.50696	0.578798	2.76414	3.73123	-0.851041	0.144764		1	0.00274799	0.0713732	9.12e-05	0.0214141	1	0.717921	0.715063	0.00154072	0.688183	0.000567901	0.000262295	0.333278	1.15607
protein_coding	receptor like protein 23	NA	receptor like protein 23 (RLP23); FUNCTIONS IN: kinase activity; INVOLVED IN: signal transduction, defense response; LOCATED IN: endomembrane system; EXPRESSED IN: 17 plant structures; EXPRESSED DURING: 9 growth stages; CONTAINS InterPro DOMAIN/s: Leucine-rich repeat (InterPro:IPR001611); BEST Arabidopsis thaliana protein match is: receptor like protein 24 (TAIR:AT2G33020.1); Has 122044 Blast hit…	AT2G32680	1.13439	2.06502	2.26276	2.41565	3.35064	1.64218	NE	-0.740853	1.4557	1.88662	2.51024	3.62177	-0.305855	-0.350674		1	0.087089	0.00581016	0.0127161	9.28e-06	1	NA	0.82074	0.137605	0.0132992	0.0012	0.000333333	1.06128	1.03595
protein_coding	Calcium-binding EF-hand family protein	NA	Calcium-binding EF-hand family protein; FUNCTIONS IN: calcium ion binding; INVOLVED IN: biological_process unknown; LOCATED IN: endomembrane system; EXPRESSED IN: 10 plant structures; EXPRESSED DURING: 9 growth stages; CONTAINS InterPro DOMAIN/s: EF-Hand 1, calcium-binding site (InterPro:IPR018247), EF-HAND 2 (InterPro:IPR018249), EF-hand-like domain (InterPro:IPR011992), Calcium-binding EF-hand …	AT3G47480	2.24249	1.56603	2.28812	2.37706	3.02217	0.738499	0.577632	0.373669	0.691641	0.670003	2.41985	4.0609	-0.347386	-0.124002		0.204155	0.0257719	0.00418164	0.00135637	4.8e-14	1	0.758514	0.677263	0.490827	0.53903	0.0012906	0.000131579	0.981505	1.0588
protein_coding	nudix hydrolase homolog 6	Encodes a protein with NADH pyrophosphatase activity. Although this protein was also shown to have ADP-ribose diphosphatase activity in vitro, mutant analyses suggest that NUDX6 is involved in NADH metabolism in vivo.	nudix hydrolase homolog 6 (NUDT6); FUNCTIONS IN: hydrolase activity, ADP-ribose diphosphatase activity, NAD or NADH binding, NADH pyrophosphatase activity; INVOLVED IN: response to other organism, positive regulation of salicylic acid mediated signaling pathway; LOCATED IN: cytosol; EXPRESSED IN: 17 plant structures; EXPRESSED DURING: 12 growth stages; CONTAINS InterPro DOMAIN/s: NUDIX hydrolase …	AT2G04450	2.25763	2.0534	2.73823	3.5916	3.06632	1.47035	0.0589065	1.12034	1.1231	0.803895	3.25697	4.57063	-0.713422	0.0792488		1	2.76e-05	0.000321353	1.98e-06	4.64e-06	1	1	0.426538	0.339822	0.575964	8.82e-05	0	0.373968	1.11313
protein_coding	beta-1,3-glucanase 2	beta 1,3-glucanase	beta-1,3-glucanase 2 (BGL2); FUNCTIONS IN: glucan 1,3-beta-glucosidase activity, protein binding, cellulase activity, hydrolase activity, hydrolyzing O-glycosyl compounds; INVOLVED IN: systemic acquired resistance, response to cold; LOCATED IN: apoplast, cell wall, vacuole; EXPRESSED IN: 17 plant structures; EXPRESSED DURING: 9 growth stages; CONTAINS InterPro DOMAIN/s: Glycoside hydrolase, catal…	AT3G57260	0.566533	1.92438	3.2866	3.4897	2.95494	1.10284	0.0978755	0.960009	2.57437	2.66929	2.73997	4.13341	1.08114	0.798842		1	0.000136727	7.71e-06	8.07e-10	1.7e-08	1	0.963287	0.226591	2.95e-11	1.08e-08	0.000588235	6.25e-05	0.318641	0.211548
protein_coding	pathogenesis-related gene 5	Thaumatin-like protein involved in response to pathogens. mRNA level of the PR-5 gene (At1g75040)is significantly changed after cutting the inflorescence stem indicating the existence of a network of signal transducing pathways as other stress-regulated genes (At5g01410, At3g17800, At1g29930)do not response to the treatment.	pathogenesis-related gene 5 (PR5); FUNCTIONS IN: molecular_function unknown; INVOLVED IN: in 6 processes; LOCATED IN: apoplast, cell wall, vacuole; EXPRESSED IN: 22 plant structures; EXPRESSED DURING: 12 growth stages; CONTAINS InterPro DOMAIN/s: Thaumatin, conserved site (InterPro:IPR017949), Thaumatin, pathogenesis-related (InterPro:IPR001938); BEST Arabidopsis thaliana protein match is: Pathog…	AT1G75040	-0.17057	1.55217	2.35845	3.05446	3.4766	-0.225522	-0.500094	0.356035	1.70142	2.23259	2.8375	4.07121	-0.0675511	-0.0611343		1	1.59e-05	0.000601668	1.73e-10	1.53e-26	1	0.839796	0.752919	1.69e-07	2.33e-08	0.000527778	0.000135135	1.03975	1.15547
protein_coding	plant natriuretic peptide A	Encodes PNP-A (Plant Natriuretic Peptide A). PNPs are a class of systemically mobile molecules distantly related to expansins; their biological role has remained elusive. PNP-A contains a signal peptide domain and is secreted into the extracellular space. Co-expression analyses using microarray data suggest that PNP-A may function as a component of plant defence response and SAR in particular, an…	plant natriuretic peptide A (PNP-A); LOCATED IN: extracellular region, cell wall; EXPRESSED IN: 19 plant structures; EXPRESSED DURING: 13 growth stages; CONTAINS InterPro DOMAIN/s: Barwin-related endoglucanase (InterPro:IPR009009), Pollen allergen, N-terminal (InterPro:IPR014734), Rare lipoprotein A (InterPro:IPR005132), Expansin 45, endoglucanase-like (InterPro:IPR007112); BEST Arabidopsis thali…	AT2G18660	1.23707	1.29946	3.03277	2.8659	2.68191	0.0977554	-0.498953	1.10589	1.37202	1.29819	3.72109	5.12158	-0.64826	-0.744697		1	0.0159947	0.000486058	5.56e-07	8.35e-21	1	1	0.220478	0.00273801	0.00586772	5.26e-05	0	0.494489	1.0195
protein_coding	WRKY DNA-binding protein 46	member of WRKY Transcription Factor; Group III	WRKY DNA-binding protein 46 (WRKY46); CONTAINS InterPro DOMAIN/s: DNA-binding WRKY (InterPro:IPR003657); BEST Arabidopsis thaliana protein match is: WRKY family transcription factor (TAIR:AT4G23810.1); Has 3385 Blast hits to 2951 proteins in 185 species: Archae - 0; Bacteria - 0; Metazoa - 0; Fungi - 0; Plants - 3370; Viruses - 0; Other Eukaryotes - 15 (source: NCBI BLink).	AT2G46400	0.92384	0.661891	1.71575	1.41468	2.9301	NE	0.333399	NE	-1.46032	1.54608	2.82936	3.96832	0.0330145	-0.228759		1	0.635877	0.0810229	0.275415	0.000729086	NA	0.985475	NA	0.756038	0.33825	0.000485294	0.000238095	1.1421	1.00448
protein_coding	COBRA-like protein 5 precursor	NA	COBRA-like protein 5 precursor (COBL5); INVOLVED IN: biological_process unknown; LOCATED IN: endomembrane system; EXPRESSED IN: 15 plant structures; EXPRESSED DURING: 12 growth stages; CONTAINS InterPro DOMAIN/s: Glycosyl-phosphatidyl inositol-anchored, plant (InterPro:IPR006918); BEST Arabidopsis thaliana protein match is: COBRA-like extracellular glycosyl-phosphatidyl inositol-anchored protein …	AT5G60950	0.411554	1.89252	2.36477	1.37243	3.27088	-0.146662	0.47611	0.191709	-0.540414	1.14185	2.09883	2.21128	-0.0201637	-0.0674066		1	0.0133737	0.00015373	0.150064	6.07e-13	1	0.953197	0.8692	0.716335	0.38125	0.00384324	0.00745296	1.09556	1.15716
protein_coding	Toll-Interleukin-Resistance (TIR) domain family protein	NA	Toll-Interleukin-Resistance (TIR) domain family protein; FUNCTIONS IN: transmembrane receptor activity; INVOLVED IN: signal transduction, innate immune response; LOCATED IN: intrinsic to membrane; EXPRESSED IN: 13 plant structures; EXPRESSED DURING: 9 growth stages; CONTAINS InterPro DOMAIN/s: Toll-Interleukin receptor (InterPro:IPR000157); BEST Arabidopsis thaliana protein match is: Disease resi…	AT2G20142	1.56221	2.64045	2.74721	1.0972	1.68119	-0.416567	NE	NE	0.963858	0.275488	1.81578	3.08943	-0.0789089	0.487787		1	0.087662	0.000806236	0.672024	0.116256	1	NA	NA	0.610217	1	0.00728112	0.00110619	1.08085	1.13751
protein_coding	Late embryogenesis abundant (LEA) hydroxyproline-rich glycoprotein family	NA	Late embryogenesis abundant (LEA) hydroxyproline-rich glycoprotein family; CONTAINS InterPro DOMAIN/s: Late embryogenesis abundant protein, group 2 (InterPro:IPR004864); BEST Arabidopsis thaliana protein match is: NDR1/HIN1-like 25 (TAIR:AT5G36970.1); Has 985 Blast hits to 984 proteins in 28 species: Archae - 0; Bacteria - 0; Metazoa - 0; Fungi - 0; Plants - 985; Viruses - 0; Other Eukaryotes - 0…	AT1G65690	1.94505	0.803851	2.0175	2.22498	1.64029	-0.943068	-0.1757	0.523459	0.681061	0.696136	1.85688	3.27177	-0.346277	-0.188869		0.836647	0.343417	0.00206656	0.000355535	0.00749153	1	1	0.49328	0.302899	0.639288	0.00712956	0.000784946	1.03024	1.00721
protein_coding	Eukaryotic aspartyl protease family protein	NA	Eukaryotic aspartyl protease family protein; FUNCTIONS IN: aspartic-type endopeptidase activity; INVOLVED IN: proteolysis; LOCATED IN: apoplast; EXPRESSED IN: 18 plant structures; EXPRESSED DURING: 12 growth stages; CONTAINS InterPro DOMAIN/s: Peptidase aspartic (InterPro:IPR021109), Peptidase aspartic, catalytic (InterPro:IPR009007), Peptidase A1 (InterPro:IPR001461); BEST Arabidopsis thaliana p…	AT5G10760	0.323268	2.43482	1.98227	2.27769	1.83265	-0.49524	0.561683	0.124398	-0.219576	0.0939466	2.12648	2.96027	-0.859304	-0.605539		1	4.89e-09	0.00290192	1.79e-05	1.94e-06	1	0.677552	0.928995	1	1	0.0031462	0.00137121	0.330855	0.919775
protein_coding	Eukaryotic aspartyl protease family protein	NA	Eukaryotic aspartyl protease family protein; FUNCTIONS IN: aspartic-type endopeptidase activity; INVOLVED IN: proteolysis; LOCATED IN: anchored to membrane; EXPRESSED IN: 7 plant structures; EXPRESSED DURING: LP.06 six leaves visible, LP.04 four leaves visible, LP.10 ten leaves visible, 4 leaf senescence stage, LP.08 eight leaves visible; CONTAINS InterPro DOMAIN/s: Peptidase aspartic (InterPro:I…	AT3G51330	1.00836	1.49441	2.28933	1.84683	1.81855	0.904656	-0.00616339	0.457203	-0.757621	-0.0733093	2.83318	2.9191	-0.685167	-0.389861		1	0.0241872	0.000710244	0.0235749	0.000118815	1	1	0.426538	0.673339	1	0.000507042	0.00151049	0.495013	1.15341
protein_coding	homolog of RPW8 4	Homolog of RPW8	homolog of RPW8 4 (HR4); FUNCTIONS IN: molecular_function unknown; INVOLVED IN: response to other organism; LOCATED IN: endomembrane system; EXPRESSED IN: 20 plant structures; EXPRESSED DURING: 11 growth stages; CONTAINS InterPro DOMAIN/s: Powdery mildew resistance protein, RPW8 domain (InterPro:IPR008808); BEST Arabidopsis thaliana protein match is: homolog of RPW8 3 (TAIR:AT3G50470.1); Has 106 …	AT3G50480	1.01876	1.22088	1.22724	1.52335	1.92096	0.633182	0.00525342	-0.295447	0.117244	0.534832	2.50427	2.62541	-0.117896	-0.195484		1	0.0621734	0.0720067	0.00166793	6.15e-06	1	0.995429	0.832036	0.804676	0.461962	0.00120536	0.00315556	1.10019	1.00522
protein_coding	solute:sodium symporters;urea transmembrane transporters	NA	DEGRADATION OF UREA 3 (DUR3); CONTAINS InterPro DOMAIN/s: Sodium/solute symporter, subgroup (InterPro:IPR019900), Sodium/solute symporter (InterPro:IPR001734); Has 9388 Blast hits to 9377 proteins in 1702 species: Archae - 173; Bacteria - 6389; Metazoa - 719; Fungi - 340; Plants - 51; Viruses - 0; Other Eukaryotes - 1716 (source: NCBI BLink).	AT5G45380	0.216957	1.11032	0.879024	1.42683	1.14303	0.282305	-0.085897	-0.315552	-0.292628	-0.477773	1.96215	1.95	-0.0204098	-0.743635		1	0.109004	0.348315	0.0131206	0.00439099	1	1	0.756204	0.939375	0.371201	0.00450485	0.0115111	1.02114	0.984598
protein_coding	cysteine-rich RLK (RECEPTOR-like protein kinase) 4	Encodes a cysteine-rich receptor-like protein kinase. Involved in programmed cell death and defense response to pathogen.	cysteine-rich RLK (RECEPTOR-like protein kinase) 4 (CRK4); FUNCTIONS IN: kinase activity; INVOLVED IN: defense response to bacterium, defense response, programmed cell death, response to salicylic acid stimulus; LOCATED IN: endomembrane system; EXPRESSED IN: 11 plant structures; EXPRESSED DURING: 9 growth stages; CONTAINS InterPro DOMAIN/s: Protein kinase, ATP binding site (InterPro:IPR017441), P…	AT3G45860	0.634615	0.321172	0.304518	1.53084	0.975372	-0.117644	-0.0817719	-0.535532	-0.345293	-1.16028	1.38033	1.83748	-0.435241	-0.0832041		1	0.765005	0.761851	0.00219131	0.0111564	1	0.994205	0.663912	0.76568	0.0170377	0.0220516	0.0147924	0.847675	0.968664
protein_coding	NAD(P)-binding Rossmann-fold superfamily protein	NA	NAD(P)-binding Rossmann-fold superfamily protein; FUNCTIONS IN: oxidoreductase activity, binding, catalytic activity; INVOLVED IN: oxidation reduction, metabolic process; LOCATED IN: cellular_component unknown; EXPRESSED IN: 18 plant structures; EXPRESSED DURING: 11 growth stages; CONTAINS InterPro DOMAIN/s: NAD(P)-binding domain (InterPro:IPR016040), Glucose/ribitol dehydrogenase (InterPro:IPR00…	AT2G47130	1.49378	2.40232	3.0539	1.04415	2.14994	1.03963	0.0824448	0.919048	-0.80243	0.35132	3.26456	3.21721	0.00502421	-0.249289		1	0.00582588	0.000483015	0.269191	2.22e-06	1	1	0.273698	0.611793	0.886717	0.000135135	0.000883495	1.13501	1.05231
protein_coding	Bifunctional inhibitor/lipid-transfer protein/seed storage 2S albumin superfamily protein	NA	Bifunctional inhibitor/lipid-transfer protein/seed storage 2S albumin superfamily protein; FUNCTIONS IN: lipid binding; INVOLVED IN: response to other organism, lipid transport; LOCATED IN: endomembrane system; EXPRESSED IN: 15 plant structures; EXPRESSED DURING: 13 growth stages; CONTAINS InterPro DOMAIN/s: Bifunctional inhibitor/plant lipid transfer protein/seed storage (InterPro:IPR016140), Pl…	AT5G55450	1.86311	2.34949	3.34971	2.519	1.91591	1.44161	0.375954	1.26125	-0.643098	-0.810654	2.9808	3.41073	-0.398654	-0.421101		0.532432	1.29e-07	3.29e-05	1.81e-06	9.89e-10	1	0.748976	0.254361	0.560888	0.117079	0.000240741	0.000523256	0.949581	0.912828
protein_coding	tyrosine aminotransferase 3	Encodes a tyrosine aminotransferase that is responsive to treatment with jasmonic acid.	tyrosine aminotransferase 3 (TAT3); CONTAINS InterPro DOMAIN/s: 1-aminocyclopropane-1-carboxylate synthase (InterPro:IPR001176), Aminotransferase, class I/classII (InterPro:IPR004839), Pyridoxal phosphate-dependent transferase, major domain (InterPro:IPR015424), Tyrosine transaminase (InterPro:IPR021178), Tyrosine/nicotianamine aminotransferase (InterPro:IPR005958), Pyridoxal phosphate-dependent …	AT2G24850	3.07756	1.9253	3.08599	3.93248	4.25934	-0.710065	NE	NE	0.875999	0.241543	4.25329	4.64387	4.29717	2.04225		0.77395	0.025675	0.000511007	6.51e-09	5.9e-24	1	NA	NA	0.294139	1	0	0	0.0055	0.0056
protein_coding	Thioredoxin superfamily protein	Encodes GRX480, a member of the glutaredoxin family that regulates protein redox state. GRX480 interacts with TGA factors and suppresses JA-responsive PDF1.2 transcription. GRX480 transcription is SA-inducible and requires NPR1. Maybe involved in SA/JA cross-talk.	GRX480; FUNCTIONS IN: electron carrier activity, protein disulfide oxidoreductase activity; INVOLVED IN: salicylic acid mediated signaling pathway, jasmonic acid mediated signaling pathway, response to salicylic acid stimulus; LOCATED IN: cellular_component unknown; EXPRESSED IN: 21 plant structures; EXPRESSED DURING: 13 growth stages; CONTAINS InterPro DOMAIN/s: Glutaredoxin-like, plant II (Inte…	AT1G28480	3.24812	1.71145	1.61394	2.74195	3.52152	0.790732	NE	0.264233	NE	NE	4.33494	4.32718	1.94685	-0.0625356		0.584938	0.131444	0.0632061	0.0105548	4.09e-08	1	NA	0.766094	NA	NA	0	4e-05	0.0680788	0.969861
protein_coding	Copper transport protein family	NA	Copper transport protein family; BEST Arabidopsis thaliana protein match is: Heavy metal transport/detoxification superfamily protein (TAIR:AT5G52750.1); Has 1807 Blast hits to 1807 proteins in 277 species: Archae - 0; Bacteria - 0; Metazoa - 736; Fungi - 347; Plants - 385; Viruses - 0; Other Eukaryotes - 339 (source: NCBI BLink).	AT5G52760	1.45568	-0.408402	1.49527	0.218624	1.00669	0.705847	-1.3321	0.768327	0.697184	1.36138	4.94322	5.95514	-0.279496	0.565907		1	1	0.0831863	0.895891	0.219525	1	0.614121	0.42141	0.245608	0.00416627	0	0	1.08345	0.935874
protein_coding	Glutaredoxin family protein	NA	Glutaredoxin family protein; FUNCTIONS IN: electron carrier activity, protein disulfide oxidoreductase activity; INVOLVED IN: response to cytokinin stimulus; EXPRESSED IN: 14 plant structures; EXPRESSED DURING: 9 growth stages; CONTAINS InterPro DOMAIN/s: Glutaredoxin-like, plant II (InterPro:IPR011905), Thioredoxin fold (InterPro:IPR012335), Glutaredoxin (InterPro:IPR002109), Thioredoxin-like fo…	AT1G03850	1.6708	1.43352	1.67932	1.846	4.14825	1.62981	0.596601	0.25498	0.191658	2.42419	4.52015	5.60177	-0.0121565	0.419151		1	0.0973123	0.0624025	0.0531404	7.5e-11	1	0.863265	0.879891	0.936765	0.0326399	0	0	1.01838	0.316858
protein_coding	Matrixin family protein	NA	Matrixin family protein; FUNCTIONS IN: metallopeptidase activity, metalloendopeptidase activity, zinc ion binding; INVOLVED IN: proteolysis, metabolic process; LOCATED IN: anchored to membrane; EXPRESSED IN: 13 plant structures; EXPRESSED DURING: 7 growth stages; CONTAINS InterPro DOMAIN/s: Peptidase M10, metallopeptidase (InterPro:IPR001818), Peptidoglycan binding-like (InterPro:IPR002477), Pept…	AT1G24140	3.67275	1.93696	2.5037	2.65093	2.15076	2.59448	0.283215	0.836771	2.97464	1.00737	2.73761	3.18555	0.122325	0.223445		0.187637	0.0971803	0.0151624	0.0248124	0.000593774	1	1	0.452349	0.00113847	0.459293	0.000560976	0.000932692	1.19065	1.10067
protein_coding	cytochrome P450, family 71, subfamily B, polypeptide 23	putative cytochrome P450	cytochrome P450, family 71, subfamily B, polypeptide 23 (CYP71B23); FUNCTIONS IN: electron carrier activity, monooxygenase activity, iron ion binding, oxygen binding, heme binding; INVOLVED IN: oxidation reduction; LOCATED IN: endomembrane system; EXPRESSED IN: 20 plant structures; EXPRESSED DURING: 11 growth stages; CONTAINS InterPro DOMAIN/s: Cytochrome P450 (InterPro:IPR001128), Cytochrome P45…	AT3G26210	3.11152	0.91723	1.35906	1.55471	1.8783	2.61131	0.0723825	-0.123146	1.10969	0.298737	3.29203	3.73735	-1.65593	0.0846835		0.329855	0.283538	0.136872	0.0568562	0.00188507	1	0.996282	0.997684	0.177207	1	9.09e-05	0.000258065	0.0373103	1.16356
protein_coding	senescence-associated gene 21	Encodes AtLEA5 (late embryogenesis abundant like protein). Also known as SENESCENCE-ASSOCIATED GENE 21 (SAG21). Has a role on oxidative stress tolerance. mRNA levels are elevated in response to various stresses.	senescence-associated gene 21 (SAG21); CONTAINS InterPro DOMAIN/s: Late embryogenesis abundant protein, group 3 (InterPro:IPR004926); BEST Arabidopsis thaliana protein match is: Late embryogenesis abundant 3 (LEA3) family protein (TAIR:AT1G02820.1); Has 166 Blast hits to 166 proteins in 34 species: Archae - 0; Bacteria - 0; Metazoa - 0; Fungi - 0; Plants - 166; Viruses - 0; Other Eukaryotes - 0 (…	AT4G02380	2.90708	1.50068	2.42101	1.70299	2.114	1.97269	0.530626	0.89288	2.77274	2.42448	4.28174	4.32266	-0.867884	-0.142263		0.0319142	0.00185961	0.00783351	3.94e-06	4.88e-14	1	0.712907	0.241558	1.04e-19	1.47e-20	0	3.85e-05	0.358422	1.16064
protein_coding	carbon/nitrogen insensitive 1	Encodes CNI1 (Carbon/Nitrogen Insensitive1) (also named as ATL31), a RING type ubiquitin ligase that functions in the Carbon/Nitrogen response for growth phase transition in Arabidopsis seedlings.	carbon/nitrogen insensitive 1 (CNI1); CONTAINS InterPro DOMAIN/s: Zinc finger, RING-type (InterPro:IPR001841), Zinc finger, C3HC4 RING-type (InterPro:IPR018957); BEST Arabidopsis thaliana protein match is: RING/U-box superfamily protein (TAIR:AT3G05200.1); Has 1807 Blast hits to 1807 proteins in 277 species: Archae - 0; Bacteria - 0; Metazoa - 736; Fungi - 347; Plants - 385; Viruses - 0; Other Eu…	AT5G27420	3.18321	2.08067	1.4836	1.01117	2.31548	1.74465	0.734144	-0.191787	1.88416	2.37422	3.68355	3.92812	-0.22123	0.989484		0.0602525	0.00246279	0.0692108	0.43323	1.51e-05	1	0.741107	0.932528	0.0047939	1.36e-05	4.35e-05	0.000244444	1.09874	0.112969
protein_coding	VQ motif-containing protein	NA	VQ motif-containing protein; CONTAINS InterPro DOMAIN/s: VQ (InterPro:IPR008889); BEST Arabidopsis thaliana protein match is: VQ motif-containing protein (TAIR:AT1G17147.1); Has 53 Blast hits to 53 proteins in 9 species: Archae - 0; Bacteria - 0; Metazoa - 0; Fungi - 0; Plants - 53; Viruses - 0; Other Eukaryotes - 0 (source: NCBI BLink).	AT1G78410	3.15451	2.53996	1.28741	1.61223	1.97975	1.8306	0.98436	-0.0040985	2.48969	2.1481	4.0995	5.77131	-0.207308	0.339604		0.152141	0.00202463	0.196184	0.207544	0.00329887	1	0.602933	0.874639	0.000563049	0.00163441	0	0	1.09955	1.15065
protein_coding	NA	NA	unknown protein; FUNCTIONS IN: molecular_function unknown; INVOLVED IN: biological_process unknown; LOCATED IN: chloroplast; EXPRESSED IN: 14 plant structures; EXPRESSED DURING: 9 growth stages; CONTAINS InterPro DOMAIN/s: Protein of unknown function DUF740 (InterPro:IPR008004); BEST Arabidopsis thaliana protein match is: unknown protein (TAIR:AT1G22470.1); Has 83 Blast hits to 83 proteins in 12 …	AT1G35210	2.79692	1.71145	NE	0.801314	3.17166	2.98572	NE	NE	1.43814	3.56034	1.97997	2.91203	-0.0377446	0.149905		0.48704	0.172455	NA	0.712787	0.00115415	1	NA	NA	0.290597	0.000240268	0.00505556	0.00152778	1.0389	1.20002
protein_coding	cysteine-rich RLK (RECEPTOR-like protein kinase) 7	Encodes a cysteine-rich receptor-like protein kinase.	cysteine-rich RLK (RECEPTOR-like protein kinase) 7 (CRK7); FUNCTIONS IN: kinase activity; INVOLVED IN: protein amino acid phosphorylation; LOCATED IN: endomembrane system; EXPRESSED IN: 11 plant structures; EXPRESSED DURING: 9 growth stages; CONTAINS InterPro DOMAIN/s: Protein kinase, ATP binding site (InterPro:IPR017441), Protein kinase, catalytic domain (InterPro:IPR000719), Protein of unknown …	AT4G23150	NE	NE	NE	NE	3.31058	NE	NE	NE	3.53679	2.58113	2.88717	4.607	-0.180774	-0.0658326		NA	NA	NA	NA	0.00561006	NA	NA	NA	0.248022	0.0420053	0.000492308	0	1.09669	0.9516
protein_coding	2-oxoglutarate (2OG) and Fe(II)-dependent oxygenase superfamily protein	NA	2-oxoglutarate (2OG) and Fe(II)-dependent oxygenase superfamily protein; FUNCTIONS IN: oxidoreductase activity, acting on paired donors, with incorporation or reduction of molecular oxygen, 2-oxoglutarate as one donor, and incorporation of one atom each of oxygen into both donors, oxidoreductase activity; INVOLVED IN: secondary metabolic process; EXPRESSED IN: 12 plant structures; EXPRESSED DURIN…	AT4G10500	NE	NE	NE	2.69716	2.91122	NE	NE	NE	0.770587	1.63451	4.06025	5.93927	0.703957	-0.0682195		NA	NA	NA	0.0344258	0.000126379	NA	NA	NA	0.767789	0.145614	0	0	0.355821	0.983961
protein_coding	receptor like protein 41	NA	receptor like protein 41 (RLP41); FUNCTIONS IN: kinase activity; INVOLVED IN: signal transduction, defense response; LOCATED IN: endomembrane system; EXPRESSED IN: 19 plant structures; EXPRESSED DURING: 12 growth stages; CONTAINS InterPro DOMAIN/s: Leucine-rich repeat (InterPro:IPR001611); BEST Arabidopsis thaliana protein match is: receptor like protein 40 (TAIR:AT3G24982.1); Has 100338 Blast hi…	AT3G25010	NE	NE	NE	NE	3.01792	NE	NE	NE	NE	NE	3.59613	5.03388	-0.111993	0.32404		NA	NA	NA	NA	0.00595869	NA	NA	NA	NA	NA	4.55e-05	0	1.09987	1.19708
protein_coding	P-loop containing nucleoside triphosphate hydrolases superfamily protein	NA	P-loop containing nucleoside triphosphate hydrolases superfamily protein; FUNCTIONS IN: nucleoside-triphosphatase activity, ATPase activity, nucleotide binding, ATP binding; EXPRESSED IN: 7 plant structures; EXPRESSED DURING: LP.06 six leaves visible, LP.04 four leaves visible, 4 anthesis, 4 leaf senescence stage; CONTAINS InterPro DOMAIN/s: ATPase, AAA-type, core (InterPro:IPR003959), ATPase, AA…	AT3G28510	NE	NE	NE	NE	3.5906	NE	NE	NE	NE	NE	2.9706	4.2371	0.0929238	-0.169064		NA	NA	NA	NA	8.09e-05	NA	NA	NA	NA	NA	0.000226415	3.23e-05	1.16481	1.00051
protein_coding	SPFH/Band 7/PHB domain-containing membrane-associated protein family	NA	SPFH/Band 7/PHB domain-containing membrane-associated protein family; FUNCTIONS IN: molecular_function unknown; INVOLVED IN: biological_process unknown; LOCATED IN: plasma membrane, vacuole; EXPRESSED IN: cultured cell; CONTAINS InterPro DOMAIN/s: Band 7 protein (InterPro:IPR001107); BEST Arabidopsis thaliana protein match is: SPFH/Band 7/PHB domain-containing membrane-associated protein family (…	AT5G25250	-0.06086	NE	NE	NE	5.38698	-0.638681	NE	NE	NE	NE	3.17151	3.85639	-0.120792	0.586272		1	NA	NA	NA	0.000179742	1	NA	NA	NA	NA	0.000142857	0.00026	1.07341	0.677142
protein_coding	AGD2-like defense response protein 1	NA	AGD2-like defense response protein 1 (ALD1); FUNCTIONS IN: transferase activity, transferring nitrogenous groups, pyridoxal phosphate binding, transaminase activity, catalytic activity; INVOLVED IN: asparagine catabolic process, biosynthetic process, glutamate catabolic process to oxaloacetate, aspartate transamidation; LOCATED IN: chloroplast; EXPRESSED IN: sepal, root, stamen; EXPRESSED DURING:…	AT2G13810	NE	NE	NE	3.94336	5.47268	NE	NE	NE	NE	NE	0.965171	1.91166	-0.117816	-0.35556		NA	NA	NA	0.121995	1.95e-05	NA	NA	NA	NA	NA	0.0803846	0.0124838	1.08318	1.04941
protein_coding	P-loop containing nucleoside triphosphate hydrolases superfamily protein	Identified as a gene that is induced by avirulence gene avrRpt2 and RPS2 after infection with Pseudomonas syringae pv maculicola strain ES4326 carrying avrRpt2	AVRRPT2-INDUCED GENE 1 (AIG1); FUNCTIONS IN: GTP binding; INVOLVED IN: response to bacterium; EXPRESSED IN: 11 plant structures; EXPRESSED DURING: 8 growth stages; CONTAINS InterPro DOMAIN/s: AIG1 (InterPro:IPR006703); BEST Arabidopsis thaliana protein match is: Avirulence induced gene (AIG1) family protein (TAIR:AT1G33950.1); Has 4495 Blast hits to 3349 proteins in 353 species: Archae - 20; Bact…	AT1G33960	-0.818206	NE	NE	5.2677	4.57856	-0.447296	NE	NE	NE	NE	0.0313387	2.23921	0.43394	0.622639		1	NA	NA	0.00246693	8.78e-05	1	NA	NA	NA	NA	1.16098	0.00693091	0.915032	1.02525
protein_coding	Cupredoxin superfamily protein	NA	Cupredoxin superfamily protein; FUNCTIONS IN: oxidoreductase activity, L-ascorbate oxidase activity, copper ion binding; INVOLVED IN: oxidation reduction; LOCATED IN: endomembrane system, extracellular region; EXPRESSED IN: 19 plant structures; EXPRESSED DURING: 12 growth stages; CONTAINS InterPro DOMAIN/s: Multicopper oxidase, type 3 (InterPro:IPR011707), Multicopper oxidase, type 2 (InterPro:IP…	AT4G39830	NE	NE	NE	4.18101	3.76404	NE	NE	NE	NE	NE	2.86956	3.80497	0.0968578	-0.063681		NA	NA	NA	0.0785244	0.000770718	NA	NA	NA	NA	NA	0.00047619	0.00025	1.17821	0.955838
protein_coding	Protein of unknown function (DUF707)	NA	Protein of unknown function (DUF707); FUNCTIONS IN: molecular_function unknown; INVOLVED IN: biological_process unknown; LOCATED IN: cellular_component unknown; EXPRESSED IN: 14 plant structures; EXPRESSED DURING: 7 growth stages; CONTAINS InterPro DOMAIN/s: Protein of unknown function DUF707 (InterPro:IPR007877); BEST Arabidopsis thaliana protein match is: Protein of unknown function (DUF707) (T…	AT3G26440	NE	NE	NE	4.36585	3.3434	NE	NE	NE	NE	NE	1.64693	2.30275	-0.46112	-0.429468		NA	NA	NA	0.0371689	0.00710539	NA	NA	NA	NA	NA	0.0107767	0.00561382	0.818377	1.1239
protein_coding	Inositol monophosphatase family protein	NA	Inositol monophosphatase family protein; FUNCTIONS IN: 3'(2'),5'-bisphosphate nucleotidase activity, inositol or phosphatidylinositol phosphatase activity; INVOLVED IN: sulfur metabolic process; EXPRESSED IN: 6 plant structures; EXPRESSED DURING: LP.06 six leaves visible, LP.04 four leaves visible, 4 anthesis; CONTAINS InterPro DOMAIN/s: Inositol monophosphatase (InterPro:IPR000760), 3(2),5 -bisp…	AT5G09290	NE	NE	NE	3.03212	3.47718	NE	NE	NE	NE	NE	2.03653	2.37076	-0.0660607	0.134462		NA	NA	NA	0.0330168	7.13e-05	NA	NA	NA	NA	NA	0.00384153	0.00479386	1.08568	1.19798
protein_coding	6-&1-fructan exohydrolase	Encodes a protein with fructan exohydrolase (FEH) activity acting on both inulin and levan-type fructans (1- and 6-FEH). The enzyme does not have invertase activity.	6-&1-fructan exohydrolase (cwINV6); FUNCTIONS IN: inulinase activity, hydrolase activity, hydrolyzing O-glycosyl compounds, levanase activity; INVOLVED IN: carbohydrate metabolic process; EXPRESSED IN: 10 plant structures; EXPRESSED DURING: 8 growth stages; CONTAINS InterPro DOMAIN/s: Glycoside hydrolase, family 32 (InterPro:IPR001362), Glycosyl hydrolases family 32, N-terminal (InterPro:IPR01314…	AT5G11920	NE	NE	NE	2.69045	1.94917	NE	NE	NE	NE	0.213125	1.37714	3.16917	-0.356171	-0.0521443		NA	NA	NA	0.105513	0.00734074	NA	NA	NA	NA	1	0.0230298	0.000933962	0.975195	0.972325
protein_coding	WRKY DNA-binding protein 38	member of WRKY Transcription Factor; Group III	WRKY DNA-binding protein 38 (WRKY38); CONTAINS InterPro DOMAIN/s: DNA-binding WRKY (InterPro:IPR003657); BEST Arabidopsis thaliana protein match is: WRKY DNA-binding protein 62 (TAIR:AT5G01900.1); Has 3118 Blast hits to 2692 proteins in 112 species: Archae - 0; Bacteria - 0; Metazoa - 0; Fungi - 0; Plants - 3102; Viruses - 0; Other Eukaryotes - 16 (source: NCBI BLink).	AT5G22570	NE	2.09255	0.917233	1.55592	0.973587	NE	0.924123	0.32568	-1.58821	-2.28194	5.08914	4.88558	0.615936	0.246566		NA	0.0152103	0.466489	0.0417517	0.0837351	NA	0.724202	0.71889	0.205534	0.003085	0	0	0.459558	1.18694
protein_coding	beta-1,3-glucanase 3	encodes a member of glycosyl hydrolase family 17	beta-1,3-glucanase 3 (BG3); FUNCTIONS IN: cellulase activity, hydrolase activity, hydrolyzing O-glycosyl compounds; INVOLVED IN: response to bacterium; LOCATED IN: apoplast, cell wall; EXPRESSED IN: 15 plant structures; EXPRESSED DURING: 9 growth stages; CONTAINS InterPro DOMAIN/s: Glycoside hydrolase, catalytic core (InterPro:IPR017853), Glycoside hydrolase, family 17 (InterPro:IPR000490), Glyco…	AT3G57240	NE	1.96337	3.79617	2.9811	2.94613	NE	-1.00903	1.10992	-2.28503	-1.51646	3.66433	3.91481	-0.486449	-0.659587		NA	0.00039724	0.000216601	1e-05	1.2e-08	NA	0.525871	0.391617	0.00610753	0.0199263	5e-05	0.000175	0.840019	0.942755
protein_coding	branched-chain amino acid transaminase 2	Encodes a chloroplast branched-chain amino acid aminotransferase. Complements the yeast leu/iso-leu/val auxotrophy mutant.	branched-chain amino acid transaminase 2 (BCAT-2); FUNCTIONS IN: branched-chain-amino-acid transaminase activity, catalytic activity; INVOLVED IN: branched chain family amino acid metabolic process, metabolic process; LOCATED IN: chloroplast; EXPRESSED IN: 21 plant structures; EXPRESSED DURING: 14 growth stages; CONTAINS InterPro DOMAIN/s: Aminotransferase, class IV (InterPro:IPR001544), Aminotra…	AT1G10070	0.496827	-0.354501	2.67997	0.0998045	2.10056	0.632724	0.237508	1.5383	3.00622	5.48354	2.30371	3.00865	1.75737	0.666672		1	1	8.96e-05	1	0.00270447	1	0.887661	0.0992501	4.62e-11	5.75e-27	0.00249315	0.00130159	0.0787543	0.366498
protein_coding	DUF679 domain membrane protein 1	NA	DUF679 domain membrane protein 1 (DMP1); CONTAINS InterPro DOMAIN/s: Protein of unknown function DUF679 (InterPro:IPR007770); BEST Arabidopsis thaliana protein match is: DUF679 domain membrane protein 2 (TAIR:AT3G21550.1); Has 263 Blast hits to 255 proteins in 17 species: Archae - 0; Bacteria - 0; Metazoa - 0; Fungi - 0; Plants - 263; Viruses - 0; Other Eukaryotes - 0 (source: NCBI BLink).	AT3G21520	2.31551	NE	NE	3.22087	NE	1.53822	NE	NE	4.28092	4.70989	1.12446	2.61254	0.0523326	-0.402221		0.797289	NA	NA	0.362326	NA	1	NA	NA	0.0174	0.00131764	0.0532104	0.00313636	1.11854	1.09326
protein_coding	pleiotropic drug resistance 12	ABC transporter family involved in ABA transport and resistance to lead. Localizes to plasma membrane. Upregulated by lead. Expressed in leaves, flowers, stomata and roots.	pleiotropic drug resistance 12 (PDR12); CONTAINS InterPro DOMAIN/s: ATPase, AAA+ type, core (InterPro:IPR003593), ABC transporter-like (InterPro:IPR003439), Plant PDR ABC transporter associated (InterPro:IPR013581), ABC-2 type transporter (InterPro:IPR013525); BEST Arabidopsis thaliana protein match is: pleiotropic drug resistance 11 (TAIR:AT1G66950.1); Has 377983 Blast hits to 279992 proteins in…	AT1G15520	-0.113898	0.570237	NE	NE	NE	-1.4437	NE	NE	4.52485	4.76713	1.11275	1.8624	0.0854018	-0.217058		1	0.926012	NA	NA	NA	1	NA	NA	0.00730549	0.00319197	0.0637725	0.0141068	1.19968	1.06279
protein_coding	FAD-binding Berberine family protein	NA	FAD-binding Berberine family protein; FUNCTIONS IN: electron carrier activity, oxidoreductase activity, FAD binding, catalytic activity; LOCATED IN: endomembrane system; EXPRESSED IN: stem, stamen; EXPRESSED DURING: 4 anthesis; CONTAINS InterPro DOMAIN/s: FAD-binding, type 2 (InterPro:IPR016166), Berberine/berberine-like (InterPro:IPR012951), FAD linked oxidase, N-terminal (InterPro:IPR006094); B…	AT1G26420	0.986028	1.32579	NE	1.54547	NE	-0.678444	NE	NE	3.88912	5.68909	0.997508	1.93003	-0.113711	-0.336158		1	0.370888	NA	0.613623	NA	1	NA	NA	8.17e-05	7.46e-07	0.0980422	0.011989	1.06324	1.1273
protein_coding	cation exchanger 3	NA	cation exchanger 3 (CAX3); CONTAINS InterPro DOMAIN/s: Sodium/calcium exchanger membrane region (InterPro:IPR004837), Calcium/proton exchanger superfamily (InterPro:IPR004798), Calcium/proton exchanger (InterPro:IPR004713); BEST Arabidopsis thaliana protein match is: cation exchanger 1 (TAIR:AT2G38170.1); Has 3567 Blast hits to 3405 proteins in 1022 species: Archae - 24; Bacteria - 2167; Metazoa …	AT3G51860	0.697263	1.25086	0.894883	1.53919	2.53613	0.292155	NE	0.946764	5.22539	4.88236	0.921965	2.41181	0.103274	-0.741418		1	0.353562	0.240867	0.411918	0.00414993	1	NA	0.155672	5.63e-14	3.03e-19	0.0981783	0.00437963	1.19994	0.678952
protein_coding	calmodulin-like 41	NA	calmodulin-like 41 (CML41); FUNCTIONS IN: calcium ion binding; INVOLVED IN: biological_process unknown; LOCATED IN: chloroplast; EXPRESSED IN: 17 plant structures; EXPRESSED DURING: 11 growth stages; CONTAINS InterPro DOMAIN/s: EF-Hand 1, calcium-binding site (InterPro:IPR018247), EF-HAND 2 (InterPro:IPR018249), EF-hand-like domain (InterPro:IPR011992), Calcium-binding EF-hand (InterPro:IPR002048…	AT3G50770	3.10545	NE	2.88554	NE	NE	1.75352	NE	NE	5.63386	4.86093	0.516285	2.03615	0.338459	-0.136291		0.0765188	NA	0.00314265	NA	NA	1	NA	NA	1.96e-05	6.03e-09	0.485903	0.00969552	1.02672	1.13343
protein_coding	FAD-binding Berberine family protein	NA	FAD-binding Berberine family protein; FUNCTIONS IN: electron carrier activity, oxidoreductase activity, FAD binding, catalytic activity; LOCATED IN: endomembrane system; EXPRESSED IN: 9 plant structures; EXPRESSED DURING: LP.06 six leaves visible, LP.04 four leaves visible, 4 anthesis, LP.08 eight leaves visible; CONTAINS InterPro DOMAIN/s: FAD-binding, type 2 (InterPro:IPR016166), Berberine/berb…	AT1G26380	3.47309	NE	NE	NE	3.76404	NE	NE	NE	6.09709	5.35357	1.26528	1.09468	0.144883	0.306965		0.0377446	NA	NA	NA	0.000448667	NA	NA	NA	1.9e-07	9.34e-12	0.0413641	0.104581	1.19631	0.725426
protein_coding	beta glucosidase 11	NA	beta glucosidase 11 (BGLU11); FUNCTIONS IN: cation binding, hydrolase activity, hydrolyzing O-glycosyl compounds, catalytic activity; INVOLVED IN: carbohydrate metabolic process; LOCATED IN: endomembrane system; EXPRESSED IN: 24 plant structures; EXPRESSED DURING: 13 growth stages; CONTAINS InterPro DOMAIN/s: Glycoside hydrolase, family 1 (InterPro:IPR001360), Glycoside hydrolase, family 1, activ…	AT1G02850	NE	NE	NE	NE	2.9055	NE	NE	NE	5.13367	3.90164	1.49661	0.423825	0.669167	0.295522		NA	NA	NA	NA	0.00319662	NA	NA	NA	0.000375817	2.48e-07	0.0177406	0.686591	0.386306	0.991269
protein_coding	amino acid transporter 1	Encodes a member of the cationic amino acid transporter (CAT) subfamily of amino acid polyamine choline transporters. Mediates efficient uptake of Lys, Arg and Glu in a yeast system.	amino acid transporter 1 (AAT1); FUNCTIONS IN: arginine transmembrane transporter activity, L-lysine transmembrane transporter activity, cationic amino acid transmembrane transporter activity, L-glutamate transmembrane transporter activity; INVOLVED IN: basic amino acid transport, L-arginine import, L-glutamate import; LOCATED IN: plasma membrane, membrane; EXPRESSED IN: 13 plant structures; EXPR…	AT4G21120	0.689629	NE	NE	NE	4.31954	0.0720231	NE	NE	4.26421	3.64393	1.76047	2.45323	-0.349402	-0.477189		1	NA	NA	NA	1.53e-06	1	NA	NA	0.0266756	0.00347815	0.00786364	0.0041133	0.997636	1.16688
protein_coding	P-loop containing nucleoside triphosphate hydrolases superfamily protein	NA	P-loop containing nucleoside triphosphate hydrolases superfamily protein; FUNCTIONS IN: nucleoside-triphosphatase activity, ATPase activity, nucleotide binding, ATP binding; INVOLVED IN: response to abscisic acid stimulus; LOCATED IN: endoplasmic reticulum; EXPRESSED IN: 10 plant structures; EXPRESSED DURING: LP.04 four leaves visible, 4 anthesis, petal differentiation and expansion stage; CONTAI…	AT3G28580	1.16222	NE	NE	NE	3.95878	NE	NE	NE	3.50869	2.20651	0.553578	2.59173	-0.109434	0.123744		1	NA	NA	NA	4.57e-05	NA	NA	NA	0.218231	0.221396	0.431367	0.0031694	1.0678	1.17882
protein_coding	ATPase E1-E2 type family protein / haloacid dehalogenase-like hydrolase family protein	NA	ATPase E1-E2 type family protein / haloacid dehalogenase-like hydrolase family protein; FUNCTIONS IN: calcium-transporting ATPase activity, calmodulin binding; INVOLVED IN: calcium ion transport, cation transport, metabolic process, ATP biosynthetic process; LOCATED IN: membrane; EXPRESSED IN: 11 plant structures; EXPRESSED DURING: LP.06 six leaves visible, LP.04 four leaves visible, 4 anthesis, …	AT3G63380	0.542391	NE	NE	0.833092	5.34214	-0.397267	NE	NE	2.28841	6.07641	1.97645	3.02633	-0.10182	-0.099586		1	NA	NA	0.831877	4.59e-05	1	NA	NA	0.0376713	8.06e-07	0.00510599	0.00115	1.0916	1.03534
protein_coding	PLANT CADMIUM RESISTANCE 2	NA	PLANT CADMIUM RESISTANCE 2 (PCR2); FUNCTIONS IN: molecular_function unknown; INVOLVED IN: response to oxidative stress; LOCATED IN: plasma membrane; EXPRESSED IN: callus; CONTAINS InterPro DOMAIN/s: Protein of unknown function Cys-rich (InterPro:IPR006461); BEST Arabidopsis thaliana protein match is: PLAC8 family protein (TAIR:AT5G35525.1); Has 803 Blast hits to 802 proteins in 112 species: Archa…	AT1G14870	2.14679	NE	NE	0.913611	6.07585	1.69021	NE	NE	2.08169	6.53765	2.19764	2.28655	0.337428	-0.246595		0.533945	NA	NA	0.701654	1.69e-09	1	NA	NA	0.177004	2.19e-11	0.00263158	0.00590661	1.07228	1.04238
protein_coding	NAD(P)-linked oxidoreductase superfamily protein	NA	NAD(P)-linked oxidoreductase superfamily protein; FUNCTIONS IN: oxidoreductase activity, aldo-keto reductase activity; INVOLVED IN: oxidation reduction; EXPRESSED IN: 7 plant structures; EXPRESSED DURING: LP.06 six leaves visible, LP.04 four leaves visible, 4 anthesis, petal differentiation and expansion stage; CONTAINS InterPro DOMAIN/s: Aldo/keto reductase (InterPro:IPR001395); BEST Arabidopsis…	AT1G60730	0.408968	-0.0286689	0.562358	4.87939	2.91469	-0.397267	-0.854207	-0.473499	5.60097	2.72883	1.6215	1.48307	-0.00990136	-0.275984		1	1	0.619864	0.00835667	1.54e-07	1	0.654294	0.927058	8.99e-06	2.06e-06	0.0111491	0.03462	1.05854	1.03536
protein_coding	cytochrome P450, family 71, subfamily A, polypeptide 13	putative cytochrome P450	cytochrome P450, family 71, subfamily A, polypeptide 13 (CYP71A13); CONTAINS InterPro DOMAIN/s: Cytochrome P450 (InterPro:IPR001128), Cytochrome P450, E-class, group I (InterPro:IPR002401), Cytochrome P450, conserved site (InterPro:IPR017972); BEST Arabidopsis thaliana protein match is: cytochrome P450, family 71, subfamily A, polypeptide 12 (TAIR:AT2G30750.1); Has 35333 Blast hits to 34131 prote…	AT2G30770	NE	NE	NE	3.8031	3.36324	NE	NE	NE	5.00874	3.49926	2.0736	4.42169	0.0856259	0.346855		NA	NA	NA	0.00123062	3.24e-07	NA	NA	NA	4.68e-10	4.04e-08	0.00412121	4.76e-05	1.16529	1.21682
protein_coding	glutathione S-transferase TAU 10	Encodes glutathione transferase belonging to the tau class of GSTs. Naming convention according to Wagner et al. (2002).	glutathione S-transferase TAU 10 (GSTU10); CONTAINS InterPro DOMAIN/s: Thioredoxin fold (InterPro:IPR012335), Glutathione S-transferase, C-terminal-like (InterPro:IPR010987), Glutathione S-transferase/chloride channel, C-terminal (InterPro:IPR017933), Glutathione S-transferase, N-terminal (InterPro:IPR004045), Thioredoxin-like fold (InterPro:IPR012336); BEST Arabidopsis thaliana protein match is:…	AT1G74590	0.959874	-0.634675	2.18024	1.60705	4.25022	NE	NE	NE	1.58708	3.64657	1.49011	3.13908	0.0416265	0.538602		1	0.991189	0.00846545	0.199373	3.43e-09	NA	NA	NA	0.103034	9.02e-05	0.0194199	0.000925234	1.10343	1.2079
protein_coding	senescence-associated gene 13	senescence-associated gene SAG13 encoding a short-chain alcohol dehydrogenase	senescence-associated gene 13 (SAG13); CONTAINS InterPro DOMAIN/s: Short-chain dehydrogenase/reductase, conserved site (InterPro:IPR020904), NAD(P)-binding domain (InterPro:IPR016040), Glucose/ribitol dehydrogenase (InterPro:IPR002347), Short-chain dehydrogenase/reductase SDR (InterPro:IPR002198); BEST Arabidopsis thaliana protein match is: NAD(P)-binding Rossmann-fold superfamily protein (TAIR:A…	AT2G29350	0.0977305	1.3962	1.95931	3.99493	2.98537	-0.425122	0.614762	0.138129	3.06875	2.88621	0.810693	2.65044	-0.00142001	-0.0864631		1	0.0126669	0.0386945	1.1e-05	1.62e-09	1	0.780765	0.97342	0.000480972	7.98e-07	0.191133	0.00301744	1.01906	0.952659
protein_coding	glucose-6-phosphate/phosphate translocator 2	glucose6-Phosphate/phosphate transporter 2	glucose-6-phosphate/phosphate translocator 2 (GPT2); FUNCTIONS IN: antiporter activity, glucose-6-phosphate transmembrane transporter activity; INVOLVED IN: in 7 processes; LOCATED IN: plasma membrane; EXPRESSED IN: 16 plant structures; EXPRESSED DURING: 10 growth stages; CONTAINS InterPro DOMAIN/s: Tpt phosphate/phosphoenolpyruvate translocator (InterPro:IPR004696), Protein of unknown function D…	AT1G61800	0.0129682	1.16831	1.877	3.28943	4.28494	0.134758	-0.00402803	1.24861	2.3308	3.24965	1.01597	1.80414	0.611043	-0.111351		1	0.202205	0.021909	1.61e-05	1.23e-18	1	1	0.16053	0.00258498	1.61e-06	0.0888743	0.0163576	0.613327	0.962825
protein_coding	Regulator of Vps4 activity in the MVB pathway protein	NA	Regulator of Vps4 activity in the MVB pathway protein; CONTAINS InterPro DOMAIN/s: Protein of unknown function DUF292, eukaryotic (InterPro:IPR005061); BEST Arabidopsis thaliana protein match is: Regulator of Vps4 activity in the MVB pathway protein (TAIR:AT1G34220.2); Has 628 Blast hits to 628 proteins in 152 species: Archae - 0; Bacteria - 0; Metazoa - 164; Fungi - 130; Plants - 284; Viruses - …	AT1G13340	1.16799	1.02776	2.44286	3.12678	4.25174	0.656816	1.35093	1.17038	1.40241	2.79502	0.593023	1.93626	0.336367	0.134505		1	0.547675	0.00674508	0.00354793	5.07e-13	1	0.645112	0.0989205	0.453552	0.000743292	0.479606	0.011721	1.03018	1.20864
protein_coding	Thioredoxin superfamily protein	NA	Thioredoxin superfamily protein; FUNCTIONS IN: protein disulfide oxidoreductase activity; INVOLVED IN: defense response to fungus, incompatible interaction; LOCATED IN: cellular_component unknown; EXPRESSED IN: 16 plant structures; EXPRESSED DURING: 10 growth stages; CONTAINS InterPro DOMAIN/s: DSBA oxidoreductase (InterPro:IPR001853), Thioredoxin-like fold (InterPro:IPR012336); Has 2126 Blast hi…	AT5G38900	3.20746	1.00512	2.89148	2.11699	2.89892	1.3166	0.15858	1.74808	3.22785	3.14366	0.947776	2.55175	0.0221671	0.0877509		0.0487031	0.184949	0.000619801	0.158767	3.97e-05	1	0.951234	0.0771255	0.000457665	4.37e-05	0.1314	0.00341237	1.09738	1.2006
protein_coding	Putative membrane lipoprotein	NA	Putative membrane lipoprotein; Has 25 Blast hits to 25 proteins in 10 species: Archae - 0; Bacteria - 2; Metazoa - 2; Fungi - 1; Plants - 18; Viruses - 0; Other Eukaryotes - 2 (source: NCBI BLink).	AT3G18250	1.90393	1.54997	1.81004	2.5106	3.42808	1.62218	0.369717	1.05998	2.38734	3.2942	1.32212	2.58861	-0.234243	-0.538445		1	0.0192745	0.0463325	0.0191402	1.12e-12	1	0.904701	0.125834	0.0279849	6.85e-14	0.0366143	0.00315385	1.10025	1.1576
protein_coding	arabinogalactan protein 5	Encodes arabinogalactan-protein (AGP5).	arabinogalactan protein 5 (AGP5); BEST Arabidopsis thaliana protein match is: arabinogalactan protein 10 (TAIR:AT4G09030.1); Has 52009 Blast hits to 24079 proteins in 1500 species: Archae - 200; Bacteria - 14022; Metazoa - 11286; Fungi - 4612; Plants - 7669; Viruses - 1962; Other Eukaryotes - 12258 (source: NCBI BLink).	AT1G35230	2.25763	1.90392	3.82453	2.16482	3.93678	1.77588	0.449546	1.84077	1.82711	3.11907	2.07795	3.31675	-0.0010352	-0.31305		1	0.0844855	0.000100325	0.0379742	6.75e-09	1	1	0.221114	0.0569316	0.00022068	0.00398974	0.000797753	1.01402	1.14306
protein_coding	glutathione S-transferase PHI 2	Encodes glutathione transferase belonging to the phi class of GSTs. Naming convention according to Wagner et al. (2002). The expression of this gene is upregulated by herbicide safeners such as benoxacor and fenclorim.	glutathione S-transferase PHI 2 (GSTF2); FUNCTIONS IN: glutathione transferase activity, glutathione binding; INVOLVED IN: in 6 processes; LOCATED IN: in 7 components; EXPRESSED IN: phloem, cotyledon, root, cultured cell, leaf; EXPRESSED DURING: seedling growth; CONTAINS InterPro DOMAIN/s: Thioredoxin fold (InterPro:IPR012335), Glutathione S-transferase, C-terminal (InterPro:IPR004046), Glutathio…	AT4G02520	1.6856	2.67605	3.13242	3.1031	3.39987	1.15724	0.931164	1.22917	1.76518	2.04784	1.49582	1.55193	-0.118564	-0.0448918		0.280752	2.33e-11	9.6e-06	2.21e-14	2.53e-35	1	0.138845	0.0741563	5.8e-10	1.18e-08	0.016233	0.0292549	1.09731	0.96221
protein_coding	Bifunctional inhibitor/lipid-transfer protein/seed storage 2S albumin superfamily protein	NA	Bifunctional inhibitor/lipid-transfer protein/seed storage 2S albumin superfamily protein; FUNCTIONS IN: lipid binding; INVOLVED IN: lipid transport; LOCATED IN: anchored to membrane; EXPRESSED IN: 14 plant structures; EXPRESSED DURING: 10 growth stages; CONTAINS InterPro DOMAIN/s: Bifunctional inhibitor/plant lipid transfer protein/seed storage (InterPro:IPR016140), Plant lipid transfer protein/…	AT3G22600	1.99794	2.01106	1.75048	1.74868	2.98248	0.382511	2.00574	1.02726	2.39141	3.4233	1.70453	3.23784	-0.578325	-0.452877		0.647981	3.76e-05	0.0070051	0.0126024	1.94e-05	1	0.066457	0.0681351	8.86e-07	4.01e-07	0.0108794	0.0008	0.653666	1.12389
protein_coding	peptide transporter 3	Encodes a di- and tri-peptide transporter involved in responses to wounding, virulent bacterial pathogens, and high NaCl concentrations. The protein is predicted to have 12 transmembrane helicies.	peptide transporter 3 (PTR3); FUNCTIONS IN: dipeptide transporter activity, tripeptide transporter activity, transporter activity; INVOLVED IN: in 12 processes; LOCATED IN: membrane; EXPRESSED IN: 10 plant structures; EXPRESSED DURING: LP.06 six leaves visible, LP.04 four leaves visible, 4 anthesis, C globular stage, petal differentiation and expansion stage; CONTAINS InterPro DOMAIN/s: Oligopept…	AT5G46050	1.9693	-0.575383	1.06893	2.34346	2.21005	1.08223	NE	NE	3.31037	2.90501	2.5118	4.13231	-0.0124091	-0.181564		1	0.926258	0.214185	0.279518	0.00400947	1	NA	NA	0.00680082	6.55e-05	0.000928571	5.88e-05	1.04335	1.02867
protein_coding	Cam-binding protein 60-like G	Encodes a calmodulin-binding protein CBP60g (calmodulin binding protein 60-like.g). The calmodulin-binding domain is located near the N-terminus; calmodulin binding is dependent on Ca(2+). Inducible by both bacterial pathogen and MAMP (microbe-associated molecular pattern) treatments. Bacterial growth is enhanced in cbp60g mutants. cbp60g mutants also show defects in salicylic acid (SA) accumulat…	Cam-binding protein 60-like G (CBP60G); FUNCTIONS IN: calmodulin binding; INVOLVED IN: defense response to bacterium, incompatible interaction, salicylic acid biosynthetic process, response to molecule of bacterial origin, response to bacterium; EXPRESSED IN: 15 plant structures; EXPRESSED DURING: 9 growth stages; CONTAINS InterPro DOMAIN/s: Calmodulin binding protein-like (InterPro:IPR012416); B…	AT5G26920	1.32719	0.977003	1.51965	3.10268	2.38284	1.66379	-0.294298	0.0998273	3.25522	1.91546	2.49014	3.37107	0.196203	0.401604		1	0.326153	0.0299232	0.000401528	5e-11	1	1	0.646314	2.12e-06	0.000466474	0.00121296	0.000689655	1.20485	0.795687
protein_coding	2-oxoglutarate (2OG) and Fe(II)-dependent oxygenase superfamily protein	Encodes a putative 2OG-Fe(II) oxygenase that is defense-associated but required for susceptibility to downy mildew.	DOWNY MILDEW RESISTANT 6 (DMR6); FUNCTIONS IN: oxidoreductase activity, acting on paired donors, with incorporation or reduction of molecular oxygen, 2-oxoglutarate as one donor, and incorporation of one atom each of oxygen into both donors, oxidoreductase activity; INVOLVED IN: response to fungus, response to bacterium, flavonoid biosynthetic process; LOCATED IN: cellular_component unknown; EXPR…	AT5G24530	2.22992	1.26044	1.78394	2.99238	3.08856	0.297106	0.237237	1.0953	2.67995	2.31694	2.92813	3.48759	-0.766709	-0.369705		0.428881	0.0158378	0.00018456	1.95e-10	9.96e-43	1	0.929016	0.076459	7.88e-17	2.99e-13	0.000383333	0.000444444	0.375618	1.1214
protein_coding	NA	NA	unknown protein; BEST Arabidopsis thaliana protein match is: unknown protein (TAIR:AT4G13266.1); Has 339 Blast hits to 265 proteins in 12 species: Archae - 0; Bacteria - 0; Metazoa - 0; Fungi - 0; Plants - 339; Viruses - 0; Other Eukaryotes - 0 (source: NCBI BLink).	AT3G13950	1.6635	NE	2.88816	2.50562	3.76404	0.980095	NE	NE	2.32886	2.95784	2.83063	3.65501	-0.157642	0.00699298		1	NA	0.00459015	0.22195	0.000893524	1	NA	NA	0.22855	0.0364413	0.000492537	0.000296875	1.09776	1.17966
protein_coding	SPFH/Band 7/PHB domain-containing membrane-associated protein family	NA	SPFH/Band 7/PHB domain-containing membrane-associated protein family; INVOLVED IN: N-terminal protein myristoylation; LOCATED IN: mitochondrion, plasma membrane, vacuole, membrane; EXPRESSED IN: 21 plant structures; EXPRESSED DURING: 9 growth stages; CONTAINS InterPro DOMAIN/s: Band 7 protein (InterPro:IPR001107); BEST Arabidopsis thaliana protein match is: SPFH/Band 7/PHB domain-containing membr…	AT3G01290	1.60353	2.27847	2.29556	2.07402	1.89671	1.05553	1.2033	0.824715	1.833	1.22556	3.76079	3.89699	-0.826059	0.468076		0.7394	2.9e-07	0.00110227	0.00057423	6.87e-06	1	0.169886	0.402535	0.00146591	0.0050803	5.88e-05	0.000255319	0.331802	0.929908
protein_coding	cytochrome BC1 synthesis	NA	cytochrome BC1 synthesis (BCS1); FUNCTIONS IN: nucleoside-triphosphatase activity, ATPase activity, nucleotide binding, ATP binding; LOCATED IN: mitochondrion; EXPRESSED IN: 24 plant structures; EXPRESSED DURING: 13 growth stages; CONTAINS InterPro DOMAIN/s: ATPase, AAA-type, core (InterPro:IPR003959), ATPase, AAA+ type, core (InterPro:IPR003593), ATPase, AAA-type, conserved site (InterPro:IPR003…	AT3G50930	2.14635	1.4257	2.1779	2.50263	2.37522	0.980095	NE	NE	2.02503	1.75139	2.79121	4.27623	0.572599	0.00377308		0.731066	0.345587	0.0229993	0.0463327	0.000245739	1	NA	NA	0.115474	0.113836	0.000545455	3.33e-05	0.750627	1.14408
protein_coding	XB3 ortholog 4 in Arabidopsis thaliana	NA	XB3 ortholog 4 in Arabidopsis thaliana (XBAT34); FUNCTIONS IN: zinc ion binding; EXPRESSED IN: 22 plant structures; EXPRESSED DURING: 13 growth stages; CONTAINS InterPro DOMAIN/s: Zinc finger, RING-type (InterPro:IPR001841), Ankyrin repeat-containing domain (InterPro:IPR020683), Ankyrin repeat (InterPro:IPR002110); BEST Arabidopsis thaliana protein match is: XB3 ortholog 5 in Arabidopsis thaliana…	AT4G14365	1.01048	1.95742	2.24421	2.22936	1.49407	0.718452	0.564611	-0.0508825	1.17817	0.577529	3.3503	3.93039	-0.956236	0.215602		1	0.0010404	0.00157108	0.000712928	0.00277801	1	0.782633	0.894325	0.0797944	0.527321	0.0001	0.000227273	0.28156	1.1899
protein_coding	Heat shock protein 70 (Hsp 70) family protein	NA	Heat shock protein 70 (Hsp 70) family protein; FUNCTIONS IN: protein binding; INVOLVED IN: protein folding, response to cadmium ion, response to heat, response to bacterium; LOCATED IN: cytosol, cell wall, plasma membrane; EXPRESSED IN: 19 plant structures; EXPRESSED DURING: 10 growth stages; CONTAINS InterPro DOMAIN/s: Heat shock protein 70, conserved site (InterPro:IPR018181), Heat shock protei…	AT5G02490	0.266896	1.3183	1.62954	2.71446	2.64525	0.493346	0.179907	0.551197	1.91435	1.24804	2.16975	2.60763	-0.160388	-0.341656		1	0.00597305	0.00303224	4.07e-05	7.56e-18	1	0.906041	0.629095	0.000578097	0.0104921	0.00262092	0.00315084	1.10089	1.11334
protein_coding	NAC domain containing protein 36	Member of the NAC transcription factor family and more specifically, the ONAC022 subfamily. Involved in leaf and inflorescence stem morphogenesis.	NAC domain containing protein 36 (NAC036); CONTAINS InterPro DOMAIN/s: No apical meristem (NAM) protein (InterPro:IPR003441); BEST Arabidopsis thaliana protein match is: NAC domain containing protein 35 (TAIR:AT2G02450.2); Has 2865 Blast hits to 2857 proteins in 76 species: Archae - 0; Bacteria - 2; Metazoa - 0; Fungi - 0; Plants - 2863; Viruses - 0; Other Eukaryotes - 0 (source: NCBI BLink).	AT2G17040	0.196211	0.671731	1.40174	2.14974	1.94827	0.722885	-0.378327	0.218229	2.26351	1.31818	2.94865	3.9171	-0.320048	-0.428402		1	0.345556	0.118615	0.000508693	2.52e-06	1	0.900278	0.804463	2.69e-05	0.0707521	0.000285714	0.00023913	1.05597	1.16784
protein_coding	Major facilitator superfamily protein	NA	Major facilitator superfamily protein; FUNCTIONS IN: molecular_function unknown; INVOLVED IN: transmembrane transport; LOCATED IN: cellular_component unknown; EXPRESSED IN: 22 plant structures; EXPRESSED DURING: 13 growth stages; CONTAINS InterPro DOMAIN/s: Nodulin-like (InterPro:IPR010658), Major facilitator superfamily MFS-1 (InterPro:IPR011701), Major facilitator superfamily, general substrate…	AT2G39210	1.1163	1.2306	1.44348	1.64252	2.35721	0.246843	-0.336717	0.44979	1.2901	1.94587	2.99851	3.51553	-1.23153	-0.404734		1	0.0169298	0.015192	0.00238929	7.54e-18	1	0.880007	0.611494	0.00341133	1.2e-07	0.000230769	0.000455696	0.112248	1.10001
protein_coding	Glycosyl hydrolases family 32 protein	Encodes a protein with invertase activity.	ATBFRUCT1; CONTAINS InterPro DOMAIN/s: Glycoside hydrolase, family 32 (InterPro:IPR001362), Glycosyl hydrolases family 32, N-terminal (InterPro:IPR013148), Glycosyl hydrolase family 32, C-terminal (InterPro:IPR013189), Concanavalin A-like lectin/glucanase (InterPro:IPR008985); BEST Arabidopsis thaliana protein match is: beta-fructofuranosidase 5 (TAIR:AT1G55120.1).	AT3G13790	1.0094	1.06111	0.86441	2.74981	2.92081	0.185408	0.0505401	0.0700925	2.31978	2.57346	3.07058	3.53668	1.49269	-0.207857		1	0.0642732	0.375056	0.000343855	1.95e-14	1	1	1	0.000326075	3.12e-07	0.000173913	0.00038961	0.105902	1.11721
protein_coding	ERF domain protein 11	encodes a member of the ERF (ethylene response factor) subfamily B-1 of ERF/AP2 transcription factor family. The protein contains one AP2 domain. There are 15 members in this subfamily including ATERF-3, ATERF-4, ATERF-7, and leafy petiole.	ERF domain protein 11 (ERF11); CONTAINS InterPro DOMAIN/s: DNA-binding, integrase-type (InterPro:IPR016177), Pathogenesis-related transcriptional factor/ERF, DNA-binding (InterPro:IPR001471); BEST Arabidopsis thaliana protein match is: ethylene responsive element binding factor 4 (TAIR:AT3G15210.1); Has 6129 Blast hits to 5763 proteins in 252 species: Archae - 0; Bacteria - 0; Metazoa - 0; Fungi …	AT1G28370	1.85564	1.2735	1.57183	2.11842	3.11011	1.34689	0.470351	0.770107	1.07941	2.17784	2.1635	2.5972	0.57237	0.130574		1	0.178814	0.112172	0.00484144	2.49e-09	1	0.979773	0.708748	0.175063	0.00190991	0.00275472	0.00315819	0.544468	1.20727
protein_coding	ethylene responsive element binding factor 2	Encodes a member of the ERF (ethylene response factor) subfamily B-3 of ERF/AP2 transcription factor family (ATERF-2). The protein contains one AP2 domain. Functions as activator of GCC boxÃƒÂ»dependent transcription. Positive regulator of JA-responsive defense genes and resistance to F. oxysporum and enhances JA inhibition of root elongation.	ethylene responsive element binding factor 2 (ERF2); CONTAINS InterPro DOMAIN/s: DNA-binding, integrase-type (InterPro:IPR016177), Pathogenesis-related transcriptional factor/ERF, DNA-binding (InterPro:IPR001471); BEST Arabidopsis thaliana protein match is: ethylene responsive element binding factor 1 (TAIR:AT4G17500.1); Has 1807 Blast hits to 1807 proteins in 277 species: Archae - 0; Bacteria - …	AT5G47220	2.22723	0.774084	1.18493	2.15749	2.68295	0.668157	-0.436321	0.434366	1.322	1.30442	1.96279	2.36949	1.06587	0.0232496		1	0.115355	0.0863771	0.00456365	3.91e-18	1	0.844832	0.470654	0.218917	0.0190183	0.00505581	0.00488261	0.2182	1.20125
protein_coding	Calcium-binding EF hand family protein	encodes a calmodulin-like protein, with six potential calcium binding domains. Calcium binding shown by Ca(2+)-specific shift in electrophoretic mobility. Expression induced by touch and darkness. Expression may also be developmentally controlled. Expression in growing regions of roots, vascular tissue, root/shoot junctions, trichomes, branch points of the shoot, and regions of siliques and flowe…	TOUCH 3 (TCH3); CONTAINS InterPro DOMAIN/s: EF-Hand 1, calcium-binding site (InterPro:IPR018247), EF-HAND 2 (InterPro:IPR018249), EF-hand-like domain (InterPro:IPR011992), Calcium-binding EF-hand (InterPro:IPR002048), EF-hand (InterPro:IPR018248); BEST Arabidopsis thaliana protein match is: calmodulin 5 (TAIR:AT2G27030.3).	AT2G41100	2.01565	0.786411	2.1317	1.63927	2.48977	1.43627	-0.689251	1.11848	2.58585	2.5847	2.20667	2.42986	-0.0333391	0.680326		0.232928	0.152976	0.00452862	0.00260822	1.67e-10	1	0.45602	0.0420326	1.54e-11	5.56e-09	0.00276582	0.00462389	1.03511	0.480125
protein_coding	Calcium-binding EF-hand family protein	NA	Calcium-binding EF-hand family protein; FUNCTIONS IN: calcium ion binding; LOCATED IN: plasma membrane; EXPRESSED IN: 23 plant structures; EXPRESSED DURING: 14 growth stages; CONTAINS InterPro DOMAIN/s: EF-Hand 1, calcium-binding site (InterPro:IPR018247), EF-HAND 2 (InterPro:IPR018249), EF-hand-like domain (InterPro:IPR011992), Calcium-binding EF-hand (InterPro:IPR002048), EF-hand (InterPro:IPR0…	AT2G41410	1.59985	1.60875	1.61416	2.19999	2.45953	1.37684	0.987579	0.934155	2.79125	2.29032	2.1944	2.81429	0.446033	-0.0816029		0.821008	0.000280774	0.00965296	5.61e-09	2.8e-18	1	0.248302	0.13453	3.97e-19	4.97e-11	0.00261039	0.00190789	0.754681	1.02109
protein_coding	syntaxin of plants 122	syntaxin protein, involved in the negative regulation of defense pathways such as programmed cell death, salicylic acid signalling pathway, jasmonic acid signalling pathway	syntaxin of plants 122 (SYP122); FUNCTIONS IN: SNAP receptor activity; INVOLVED IN: in 9 processes; LOCATED IN: plasma membrane; EXPRESSED IN: 22 plant structures; EXPRESSED DURING: 10 growth stages; CONTAINS InterPro DOMAIN/s: Target SNARE coiled-coil domain (InterPro:IPR000727), t-SNARE (InterPro:IPR010989), Syntaxin/epimorphin, conserved site (InterPro:IPR006012), Syntaxin, N-terminal (InterPr…	AT3G52400	2.31353	2.10423	1.37313	2.35999	1.55644	1.59639	0.837501	0.296497	2.04306	1.37509	2.28412	2.86088	-0.129632	-0.0791117		0.739041	0.000380425	0.00703213	0.0028321	0.00146491	1	0.765465	0.611544	0.00406254	0.0076581	0.00197744	0.00163514	1.09889	1.14223
protein_coding	myb domain protein 51	Encodes a member of the R2R3-MYB transcription family. Involved in indole glucosinolate biosynthesis.	myb domain protein 51 (MYB51); CONTAINS InterPro DOMAIN/s: SANT, DNA-binding (InterPro:IPR001005), Homeodomain-like (InterPro:IPR009057), Myb, DNA-binding (InterPro:IPR014778), HTH transcriptional regulator, Myb-type, DNA-binding (InterPro:IPR017930), Homeodomain-related (InterPro:IPR012287), Myb transcription factor (InterPro:IPR015495); BEST Arabidopsis thaliana protein match is: myb domain pro…	AT1G18570	2.33484	0.391339	0.54043	2.55378	2.19736	0.860064	0.15858	0.163803	2.82501	2.05115	2.98246	3.26807	-0.380834	-0.221412		1	0.898392	0.641943	0.0306048	0.000252741	1	1	0.934227	0.00631527	0.00125457	0.000235294	0.000776596	0.970205	1.07008
protein_coding	salt-inducible zinc finger 1	NA	salt-inducible zinc finger 1 (SZF1); CONTAINS InterPro DOMAIN/s: Zinc finger, CCCH-type (InterPro:IPR000571), Ankyrin repeat-containing domain (InterPro:IPR020683), Ankyrin repeat (InterPro:IPR002110); BEST Arabidopsis thaliana protein match is: zinc finger (CCCH-type) family protein (TAIR:AT2G40140.2); Has 1623 Blast hits to 1414 proteins in 181 species: Archae - 2; Bacteria - 49; Metazoa - 777;…	AT3G55980	2.20313	0.381501	1.33287	1.81423	1.3039	2.28603	-0.247535	0.339895	2.59823	1.90637	2.62225	3.17956	0.674226	0.661945		0.677795	0.434773	0.0438017	0.02163	0.0158902	1	1	0.759804	9.26e-07	0.00230627	0.000709677	0.000925926	0.417163	0.458516
protein_coding	cooperatively regulated by ethylene and jasmonate 1	Encodes a member of the DREB subfamily A-5 of ERF/AP2 transcription factor family. The protein contains one AP2 domain. Involved in defense and freezing stress responses. There are 16 members in this subfamily including RAP2.1, RAP2.9 and RAP2.10.	cooperatively regulated by ethylene and jasmonate 1 (CEJ1); CONTAINS InterPro DOMAIN/s: DNA-binding, integrase-type (InterPro:IPR016177), Pathogenesis-related transcriptional factor/ERF, DNA-binding (InterPro:IPR001471); BEST Arabidopsis thaliana protein match is: DREB and EAR motif protein 2 (TAIR:AT5G67190.1); Has 5544 Blast hits to 5466 proteins in 235 species: Archae - 0; Bacteria - 0; Metazo…	AT3G50260	0.0964432	0.0662177	0.980118	3.32068	2.76831	0.900706	0.0122867	-0.145869	2.40597	1.113	2.80961	3.13345	0.287634	0.61327		1	0.950611	0.207915	0.0189198	4.37e-06	1	0.996109	0.882143	0.147621	0.394431	0.000507246	0.000972973	1.14466	0.431249
protein_coding	Heat shock protein 70 (Hsp 70) family protein	NA	BIP3; FUNCTIONS IN: ATP binding; INVOLVED IN: protein folding, response to heat, pollen tube growth; LOCATED IN: endoplasmic reticulum lumen; EXPRESSED IN: 10 plant structures; EXPRESSED DURING: 10 growth stages; CONTAINS InterPro DOMAIN/s: Heat shock protein 70, conserved site (InterPro:IPR018181), Heat shock protein Hsp70 (InterPro:IPR001023), Heat shock protein 70 (InterPro:IPR013126); BEST Ar…	AT1G09080	-0.618086	0.450753	1.67748	2.43834	2.50362	-1.58514	-0.574902	1.36864	3.04705	3.64657	0.402345	3.04389	-0.199662	0.815451		1	0.764554	0.0502472	0.202847	0.0572704	1	0.898969	0.117765	0.0208616	0.000116925	0.714992	0.00114876	1.09785	0.995171
protein_coding	PDI-like 2-2	Encodes a protein disulfide isomerase-like (PDIL) protein, a member of a multigene family within the thioredoxin (TRX) superfamily. Transcript levels for this gene are up-regulated in response to three different chemical inducers of ER stress (dithiothreitol, beta-mercaptoethanol, and tunicamycin). AtIRE1-2 does not appear to be required for this response, but the atbzip60 mutant has a diminished…	PDI-like 2-2 (PDIL2-2); CONTAINS InterPro DOMAIN/s: Thioredoxin fold (InterPro:IPR012335), Disulphide isomerase (InterPro:IPR005788), Thioredoxin domain (InterPro:IPR013766), Thioredoxin, conserved site (InterPro:IPR017937), Thioredoxin-like subdomain (InterPro:IPR006662), Thioredoxin-like (InterPro:IPR017936), Thioredoxin-like fold (InterPro:IPR012336); BEST Arabidopsis thaliana protein match is…	AT1G04980	-1.3065	0.461626	2.15469	3.45008	2.75732	-0.431431	-0.38915	1.46136	3.61866	2.37381	2.72776	3.1773	0.268784	-0.385482		1	0.752417	0.0004242	3.75e-06	9.17e-13	1	0.844584	0.159289	7.26e-10	6.93e-08	0.000632184	0.000963303	1.17074	1.15893
protein_coding	NA	NA	unknown protein; BEST Arabidopsis thaliana protein match is: unknown protein (TAIR:AT5G23160.1); Has 69 Blast hits to 69 proteins in 10 species: Archae - 0; Bacteria - 1; Metazoa - 0; Fungi - 0; Plants - 68; Viruses - 0; Other Eukaryotes - 0 (source: NCBI BLink).	AT5G08240	0.991052	0.988035	2.39294	3.204	3.16033	NE	-0.13706	1.75557	2.85415	1.70921	2.28049	2.74837	0.922956	-0.129324		1	0.434367	0.0235523	0.0229289	0.000161225	NA	1	0.0632084	0.0507219	0.386641	0.00197778	0.0022795	0.240933	1.03125
protein_coding	Glycolipid transfer protein (GLTP) family protein	NA	Glycolipid transfer protein (GLTP) family protein; FUNCTIONS IN: glycolipid transporter activity, glycolipid binding; INVOLVED IN: glycolipid transport; LOCATED IN: cytoplasm; EXPRESSED IN: 16 plant structures; EXPRESSED DURING: 10 growth stages; CONTAINS InterPro DOMAIN/s: Glycolipid transfer protein, GLTP (InterPro:IPR014830); BEST Arabidopsis thaliana protein match is: Glycolipid transfer prot…	AT4G39670	1.82559	NE	NE	1.93606	3.5906	0.124671	NE	1.97051	2.01051	2.25492	1.32287	2.35745	-0.0878048	0.929734		1	NA	NA	0.210039	2.18e-05	1	NA	0.113505	0.0710723	0.158996	0.031751	0.00506438	1.0567	0.622271
protein_coding	ADP/ATP carrier 3	Encodes a mitochondrial ADP/ATP carrier protein. Shown in heterologous systems to be located in the plasma membrane. Has comparable affinity for ADP and ATP (in E.coli).	ADP/ATP carrier 3 (AAC3); FUNCTIONS IN: binding, ATP:ADP antiporter activity; INVOLVED IN: transport, mitochondrial transport, purine nucleotide transport; LOCATED IN: mitochondrion, mitochondrial inner membrane, membrane, chloroplast envelope; EXPRESSED IN: 23 plant structures; EXPRESSED DURING: 14 growth stages; CONTAINS InterPro DOMAIN/s: Mitochondrial carrier protein (InterPro:IPR002067), Mit…	AT4G28390	0.64523	0.526281	1.82184	1.66515	2.09646	0.613153	0.312259	1.10796	2.85335	3.16751	0.579363	2.04123	-0.0693878	-0.712423		1	0.735829	0.00106016	0.039049	1.47e-05	1	0.938885	0.152976	1.86e-07	1.49e-12	0.416548	0.00942424	1.06358	1.01817
protein_coding	NAC-like, activated by AP3/PI	Encodes a member of the NAC transcription factor gene family. It is expressed in floral primordia and upregulated by AP3 and PI. Its expression is associated with leaf senescence.	NAC-like, activated by AP3/PI (NAP); CONTAINS InterPro DOMAIN/s: No apical meristem (NAM) protein (InterPro:IPR003441); BEST Arabidopsis thaliana protein match is: NAC domain containing protein 25 (TAIR:AT1G61110.1); Has 3046 Blast hits to 3040 proteins in 76 species: Archae - 0; Bacteria - 0; Metazoa - 0; Fungi - 0; Plants - 3046; Viruses - 0; Other Eukaryotes - 0 (source: NCBI BLink).	AT1G69490	0.748644	-0.660513	1.34284	0.928248	2.41545	0.826973	0.00354127	-0.0341386	2.22752	3.44079	1.67571	1.14793	-0.274009	-0.0173129		1	0.688336	0.0992784	0.454206	0.00280767	1	1	1	0.00112142	9.48e-08	0.0113129	0.108304	1.07525	1.07546
protein_coding	NA	Encodes a protein involved in salt tolerance, names SIS (Salt Induced Serine rich).	unknown protein; FUNCTIONS IN: molecular_function unknown; INVOLVED IN: biological_process unknown; LOCATED IN: chloroplast; EXPRESSED IN: 13 plant structures; EXPRESSED DURING: 6 growth stages; BEST Arabidopsis thaliana protein match is: unknown protein (TAIR:AT5G59080.1); Has 52 Blast hits to 52 proteins in 8 species: Archae - 0; Bacteria - 0; Metazoa - 0; Fungi - 0; Plants - 52; Viruses - 0; O…	AT5G02020	0.00471288	0.503126	0.382858	0.835769	0.805683	1.19103	1.4191	-0.226568	3.0512	3.72496	1.32307	1.67229	0.0803649	-0.0718949		1	0.5998	0.659324	0.539508	0.182287	1	0.183758	0.799688	1.46e-09	3.55e-19	0.0348271	0.0240896	1.19702	0.996586
protein_coding	multidrug resistance-associated protein 4	Encodes a plasma membrane localized ATPase transporter involved in multidrug transport. The expression of this gene is upregulated by herbicide safeners such as benoxacor, fluxofenim and fenclorim.	multidrug resistance-associated protein 4 (MRP4); FUNCTIONS IN: ATPase activity, coupled to transmembrane movement of substances, folic acid transporter activity; INVOLVED IN: response to water deprivation, drug transmembrane transport, response to wounding, response to nematode, stomatal movement; LOCATED IN: vacuolar membrane, plasma membrane, vacuole, plant-type vacuole; EXPRESSED IN: 27 plant…	AT2G47800	-0.105907	0.75639	0.314729	0.852573	1.03121	NE	-0.0713058	1.08236	3.05879	3.1325	2.22701	2.52401	0.395185	0.463006		1	0.685575	0.963895	0.564883	0.109212	NA	1	0.550188	7.62e-08	3.52e-09	0.00228671	0.00377889	0.924299	0.924428
protein_coding	serine-type endopeptidase inhibitors	NA	serine-type endopeptidase inhibitors; FUNCTIONS IN: serine-type endopeptidase inhibitor activity; INVOLVED IN: response to oxidative stress; LOCATED IN: endomembrane system; EXPRESSED IN: 21 plant structures; EXPRESSED DURING: 12 growth stages; CONTAINS InterPro DOMAIN/s: Proteinase inhibitor I20, Pin2 (InterPro:IPR003465); Has 28 Blast hits to 28 proteins in 8 species: Archae - 0; Bacteria - 0; …	AT1G72060	1.92607	-0.792185	0.764382	3.0752	3.18747	1.69353	-1.4901	-0.332163	4.50443	3.61549	3.5269	3.58871	-1.16187	-0.234499		1	0.785497	0.496158	0.00548793	2.85e-08	1	0.311749	0.94898	8.99e-12	1.12e-13	7.41e-05	0.000308824	0.140769	1.12365
protein_coding	cytochrome P450, family 81, subfamily F, polypeptide 2	member of CYP81F, involved in glucosinolate metabolism. Mutants had impaired resistance to fungi.	cytochrome P450, family 81, subfamily F, polypeptide 2 (CYP81F2); FUNCTIONS IN: electron carrier activity, monooxygenase activity, iron ion binding, oxygen binding, heme binding; INVOLVED IN: in 7 processes; LOCATED IN: endomembrane system; EXPRESSED IN: 8 plant structures; EXPRESSED DURING: 6 growth stages; CONTAINS InterPro DOMAIN/s: Cytochrome P450 (InterPro:IPR001128), Cytochrome P450, conser…	AT5G57220	3.04687	NE	NE	NE	2.49662	1.93345	NE	NE	4.97845	2.51522	2.56361	2.88854	0.113647	0.760377		0.673054	NA	NA	NA	0.015667	1	NA	NA	0.00230119	0.00528931	0.00105882	0.00156849	1.18065	0.259872
protein_coding	WRKY DNA-binding protein 40	Pathogen-induced transcription factor. Binds W-box sequences in vitro. Forms protein complexes with itself and with WRKY40 and WRKY60. Coexpression with WRKY18 or WRKY60 made plants more susceptible to both P. syringae and B. cinerea. WRKY18, WRKY40, and WRKY60 have partially redundant roles in response to the hemibiotrophic bacterial pathogen Pseudomonas syringae and the necrotrophic fungal path…	WRKY DNA-binding protein 40 (WRKY40); CONTAINS InterPro DOMAIN/s: DNA-binding WRKY (InterPro:IPR003657); BEST Arabidopsis thaliana protein match is: WRKY DNA-binding protein 18 (TAIR:AT4G31800.2); Has 3306 Blast hits to 2859 proteins in 187 species: Archae - 0; Bacteria - 0; Metazoa - 0; Fungi - 0; Plants - 3292; Viruses - 0; Other Eukaryotes - 14 (source: NCBI BLink).	AT1G80840	1.08371	-0.288857	1.05598	NE	2.60483	0.0241253	-0.492068	-0.358945	4.19538	1.98876	4.15533	4.06104	2.78514	1.27171		1	0.941164	0.206812	NA	0.0024989	1	0.905045	0.858664	0.0568697	0.156667	0	0.000128205	0.0280306	0.0544857
protein_coding	glutathione S-transferase 7	Encodes glutathione transferase belonging to the phi class of GSTs. Naming convention according to Wagner et al. (2002).	glutathione S-transferase 7 (GSTF7); FUNCTIONS IN: glutathione transferase activity, copper ion binding, cobalt ion binding, glutathione binding; INVOLVED IN: defense response to fungus, incompatible interaction, response to cadmium ion, response to salt stress, defense response to bacterium, toxin catabolic process; LOCATED IN: nucleus, vacuole, cytoplasm; EXPRESSED IN: root, cultured cell, leaf…	AT1G02920	2.47418	3.67228	2.52883	3.31863	3.521	1.36032	1.82461	0.868511	4.29753	3.87107	2.37528	2.45671	0.0599475	-0.0379245		0.0344367	1.37e-13	0.00102688	3.4e-08	1.18e-26	1	0.0149094	0.322943	9.52e-20	4.24e-32	0.00148387	0.00404951	1.19253	0.965409
protein_coding	NA	NA	unknown protein; FUNCTIONS IN: molecular_function unknown; INVOLVED IN: biological_process unknown; LOCATED IN: membrane; EXPRESSED IN: 16 plant structures; EXPRESSED DURING: 9 growth stages; CONTAINS InterPro DOMAIN/s: Protein of unknown function DUF975 (InterPro:IPR010380); BEST Arabidopsis thaliana protein match is: unknown protein (TAIR:AT2G18680.1); Has 186 Blast hits to 184 proteins in 18 s…	AT2G18690	2.12917	2.55252	2.77721	2.65499	3.59269	1.1377	-0.0163714	0.664206	3.43595	3.96518	2.67758	3.64705	0.0954855	-0.562803		0.199639	0.000869712	5.98e-05	7.15e-05	8.65e-11	1	0.967475	0.3601	1.03e-10	3e-18	0.000622222	0.000304348	1.2015	1.10949
protein_coding	blue-copper-binding protein	Al-stress-induced gene	blue-copper-binding protein (BCB); FUNCTIONS IN: electron carrier activity, copper ion binding; INVOLVED IN: response to oxidative stress, response to salt stress, aluminum ion transport, response to wounding, response to absence of light; LOCATED IN: anchored to plasma membrane, plasma membrane, vacuole, anchored to membrane; EXPRESSED IN: 24 plant structures; EXPRESSED DURING: 12 growth stages;…	AT5G20230	0.427355	1.90183	2.7864	3.42997	4.25554	1.16297	0.647479	1.42666	3.21362	2.9208	3.36944	3.6035	0.309281	0.685626		1	1.46e-05	8.92e-07	5.3e-13	2.61e-83	1	0.547388	0.000828943	1.74e-20	3.94e-21	0.000103448	0.000356164	1.0995	0.360272
protein_coding	Curculin-like (mannose-binding) lectin family protein	NA	Curculin-like (mannose-binding) lectin family protein; FUNCTIONS IN: sugar binding; INVOLVED IN: response to karrikin; LOCATED IN: plant-type cell wall; EXPRESSED IN: 22 plant structures; EXPRESSED DURING: 12 growth stages; CONTAINS InterPro DOMAIN/s: Curculin-like (mannose-binding) lectin (InterPro:IPR001480); BEST Arabidopsis thaliana protein match is: lectin protein kinase family protein (TAIR…	AT5G18470	2.23312	2.6275	3.5298	3.91384	4.32886	0.162905	0.575201	1.29596	3.69554	3.27779	3.75911	4.60086	-0.302261	-0.00585798		0.13419	0.000932776	1.51e-05	1.58e-06	7.79e-18	1	0.960197	0.194929	2.84e-08	8.26e-07	5.56e-05	0	1.06252	0.952622
protein_coding	NA	NA	unknown protein; BEST Arabidopsis thaliana protein match is: unknown protein (TAIR:AT3G48180.1); Has 88 Blast hits to 88 proteins in 15 species: Archae - 0; Bacteria - 0; Metazoa - 0; Fungi - 0; Plants - 88; Viruses - 0; Other Eukaryotes - 0 (source: NCBI BLink).	AT1G19020	1.93939	1.55628	1.89906	3.50733	2.92413	0.923439	0.390379	1.51717	5.29382	2.79146	3.13975	3.42943	0.923863	0.776776		0.731066	0.0797344	0.0182377	0.00646682	6.33e-07	1	0.847779	0.0878059	1.3e-11	4.41e-07	0.000181818	0.000517647	0.233427	0.236843
protein_coding	Calcium-binding EF-hand family protein	NA	Calcium-binding EF-hand family protein; FUNCTIONS IN: calcium ion binding; INVOLVED IN: biological_process unknown; LOCATED IN: cellular_component unknown; EXPRESSED IN: 21 plant structures; EXPRESSED DURING: 13 growth stages; CONTAINS InterPro DOMAIN/s: EF-Hand 1, calcium-binding site (InterPro:IPR018247), EF-HAND 2 (InterPro:IPR018249), EF-hand-like domain (InterPro:IPR011992), Calcium-binding …	AT5G39670	2.42954	1.3659	3.36932	5.59818	2.81433	1.6045	0.428436	1.14627	5.52587	2.94763	3.52642	5.25774	-0.4368	-0.434935		0.164664	0.102521	4.86e-05	2.97e-05	8.11e-06	1	0.748976	0.45676	1.67e-05	0.000190009	7.69e-05	0	0.890472	1.16712
protein_coding	Cytochrome P450 superfamily protein	Mutations in pad3 are defective in biosynthesis of the indole derived phytoalexin camalexin. Encodes a cytochrome P450 enzyme that catalyzes the conversion of dihydrocamalexic acid to camalexin.	PHYTOALEXIN DEFICIENT 3 (PAD3); FUNCTIONS IN: dihydrocamalexic acid decarboxylase activity, monooxygenase activity, oxygen binding; INVOLVED IN: in 6 processes; LOCATED IN: endoplasmic reticulum, microsome; EXPRESSED IN: 15 plant structures; EXPRESSED DURING: 9 growth stages; CONTAINS InterPro DOMAIN/s: Cytochrome P450 (InterPro:IPR001128), Cytochrome P450, E-class, group I (InterPro:IPR002401), …	AT3G26830	3.58285	0.763827	3.30657	4.42373	3.71426	1.49443	-1.51452	1.15985	5.73596	3.95652	4.22363	4.30585	1.14621	0.196022		0.0154984	0.420796	0.000108254	1.82e-05	5.11e-15	1	0.623733	0.244104	1.13e-11	4.41e-15	0	3.45e-05	0.286281	1.03833
protein_coding	glutathione S-transferase tau 4	Encodes glutathione transferase belonging to the tau class of GSTs. Naming convention according to Wagner et al. (2002).	glutathione S-transferase tau 4 (GSTU4); CONTAINS InterPro DOMAIN/s: Thioredoxin fold (InterPro:IPR012335), Glutathione S-transferase, C-terminal (InterPro:IPR004046), Glutathione S-transferase, C-terminal-like (InterPro:IPR010987), Glutathione S-transferase/chloride channel, C-terminal (InterPro:IPR017933), Glutathione S-transferase, N-terminal (InterPro:IPR004045), Thioredoxin-like fold (InterP…	AT2G29460	1.18165	NE	3.02848	4.75854	4.88492	-1.84326	NE	1.32085	5.68466	4.99857	4.095	3.95805	0.87272	0.516285		1	NA	0.00102367	0.000206792	3.99e-25	1	NA	0.13766	5.32e-11	2.75e-23	0	0.000195122	0.270264	0.649436
protein_coding	chitinase, putative	NA	chitinase, putative (CHI); FUNCTIONS IN: chitin binding, chitinase activity; INVOLVED IN: carbohydrate metabolic process, cell wall macromolecule catabolic process; LOCATED IN: apoplast, plant-type cell wall; EXPRESSED IN: 15 plant structures; EXPRESSED DURING: 10 growth stages; CONTAINS InterPro DOMAIN/s: Chitin-binding, type 1, conserved site (InterPro:IPR018371), Glycoside hydrolase, family 19…	AT2G43570	0.699859	-0.50117	4.17765	3.9192	3.85989	-0.0336257	-2.98749	1.56105	3.41828	4.14752	2.08098	3.07634	-0.0361547	-0.104599		1	1	0.000156978	4.45e-09	4.15e-15	1	0.0105026	0.25243	1.22e-08	5.68e-20	0.00389119	0.00111607	1.07537	0.953807
protein_coding	VQ motif-containing protein	NA	VQ motif-containing protein; FUNCTIONS IN: molecular_function unknown; INVOLVED IN: biological_process unknown; LOCATED IN: chloroplast; EXPRESSED IN: stem, inflorescence meristem, sepal, leaf, stamen; EXPRESSED DURING: LP.06 six leaves visible, LP.04 four leaves visible, 4 anthesis; CONTAINS InterPro DOMAIN/s: VQ (InterPro:IPR008889); BEST Arabidopsis thaliana protein match is: VQ motif-containi…	AT3G22160	4.06896	1.74256	2.08033	4.91934	1.76658	NE	0.832017	1.43765	4.61984	0.298737	1.57838	1.73527	1.24534	0.332244		0.10538	0.0483717	0.0282995	0.00277672	0.00641613	NA	0.748976	0.0531929	0.0158497	0.973592	0.0147709	0.0205604	0.141205	0.916749
protein_coding	sulfur E2	Encodes a protein capable of stimulating the cysteine desulfurase activity of CpNifS (AT1G08490) in vitro. SufE2:GFP localizes to the chloroplasts where it is likely to play a role in iron-sulfur cluster assembly. Transcript levels for this gene are high in the pollen relative to other organs based on RT-PCR analysis.	sulfur E2 (SUFE2); CONTAINS InterPro DOMAIN/s: Fe-S metabolism associated SufE (InterPro:IPR003808); BEST Arabidopsis thaliana protein match is: quinolinate synthase (TAIR:AT5G50210.1); Has 2361 Blast hits to 2361 proteins in 734 species: Archae - 2; Bacteria - 1651; Metazoa - 0; Fungi - 0; Plants - 86; Viruses - 0; Other Eukaryotes - 622 (source: NCBI BLink).	AT1G67810	NE	2.91573	3.1946	NE	3.99946	NE	NE	NE	NE	2.79761	2.26545	2.08177	-0.186599	-0.0826931		NA	0.0549859	0.00727141	NA	2e-07	NA	NA	NA	NA	0.01387	0.00216901	0.00927161	1.09999	0.958091
protein_coding	Polynucleotidyl transferase, ribonuclease H-like superfamily protein	NA	Polynucleotidyl transferase, ribonuclease H-like superfamily protein; FUNCTIONS IN: ribonuclease activity, nucleic acid binding; INVOLVED IN: response to biotic stimulus, response to wounding, RNA modification; LOCATED IN: nucleus; EXPRESSED IN: 22 plant structures; EXPRESSED DURING: 12 growth stages; CONTAINS InterPro DOMAIN/s: Ribonuclease CAF1 (InterPro:IPR006941), Polynucleotidyl transferase,…	AT3G44260	2.4914	-0.295146	0.150808	1.58974	2.62863	2.73335	-0.592758	0.570162	2.0869	1.78574	1.62899	2.31756	0.772554	-0.00791349		0.692813	1	0.937167	0.3714	0.000411443	1	0.862099	0.576993	0.132308	0.12772	0.0146854	0.00557377	0.300701	0.960658
protein_coding	MATE efflux family protein	NA	MATE efflux family protein; FUNCTIONS IN: antiporter activity, drug transmembrane transporter activity, transporter activity; INVOLVED IN: drug transmembrane transport, transmembrane transport; LOCATED IN: membrane; EXPRESSED IN: 10 plant structures; EXPRESSED DURING: 6 growth stages; CONTAINS InterPro DOMAIN/s: Multi antimicrobial extrusion protein MatE (InterPro:IPR002528); BEST Arabidopsis tha…	AT3G23550	3.34581	NE	NE	1.02654	4.42352	1.83616	NE	NE	1.13427	3.64657	2.26117	1.54324	3.03343	1.24053		0.047915	NA	NA	0.674371	4.1e-10	1	NA	NA	0.702662	0.000314412	0.0020365	0.0300861	0.022075	0.0829878
protein_coding	NA	NA	unknown protein; FUNCTIONS IN: molecular_function unknown; INVOLVED IN: biological_process unknown; LOCATED IN: cellular_component unknown; EXPRESSED IN: 20 plant structures; EXPRESSED DURING: 10 growth stages; BEST Arabidopsis thaliana protein match is: unknown protein (TAIR:AT1G68440.1).	AT1G25400	1.8751	NE	NE	0.560455	4.32742	2.40377	NE	NE	1.37999	4.70989	1.84893	2.16593	-0.190021	1.52566		1	NA	NA	0.988373	0.00815044	1	NA	NA	0.466495	0.00318301	0.00779457	0.0077322	1.08558	0.020122
protein_coding	WRKY family transcription factor	member of WRKY Transcription Factor; Group II-b	WRKY47; CONTAINS InterPro DOMAIN/s: DNA-binding WRKY (InterPro:IPR003657); BEST Arabidopsis thaliana protein match is: WRKY family transcription factor (TAIR:AT4G04450.1); Has 3605 Blast hits to 3148 proteins in 215 species: Archae - 2; Bacteria - 4; Metazoa - 47; Fungi - 10; Plants - 3482; Viruses - 0; Other Eukaryotes - 60 (source: NCBI BLink).	AT4G01720	0.521844	1.29259	0.189497	1.81551	3.3434	0.382511	0.928942	-0.167416	1.98102	3.73218	0.643704	1.35837	-0.417797	-0.05139		1	0.157931	0.982402	0.187665	0.00467884	1	0.681651	0.927058	0.0836329	0.000175637	0.323257	0.0470735	0.943374	1.0041
protein_coding	oligopeptide transporter 1	oligopeptide transporter	oligopeptide transporter 1 (OPT1); CONTAINS InterPro DOMAIN/s: Tetrapeptide transporter, OPT1/isp4 (InterPro:IPR004648), Oligopeptide transporter OPT superfamily (InterPro:IPR004813); BEST Arabidopsis thaliana protein match is: oligopeptide transporter 5 (TAIR:AT4G26590.1); Has 1807 Blast hits to 1807 proteins in 277 species: Archae - 0; Bacteria - 0; Metazoa - 736; Fungi - 347; Plants - 385; Vir…	AT5G55930	-0.23902	0.938816	0.715168	1.3339	2.93282	0.613212	0.492471	0.509371	2.13709	3.82006	1.49	2.29673	0.225086	-0.0208024		1	0.39411	0.727593	0.2007	3.64e-12	1	0.912765	0.8407	0.000702972	3.58e-10	0.0199058	0.005736	1.18557	0.968233
protein_coding	NA	NA	unknown protein; BEST Arabidopsis thaliana protein match is: unknown protein (TAIR:AT5G12340.1); Has 166 Blast hits to 162 proteins in 36 species: Archae - 0; Bacteria - 2; Metazoa - 15; Fungi - 5; Plants - 124; Viruses - 0; Other Eukaryotes - 20 (source: NCBI BLink).	AT1G28190	1.91796	0.429382	1.27386	0.847231	3.55378	-0.0952339	0.415985	0.753165	1.60693	3.56034	1.59694	1.57403	0.460357	0.264333		0.909746	0.945889	0.212567	0.793577	1.24e-05	1	0.994775	0.525185	0.26771	1e-05	0.0158275	0.028397	0.764891	0.9802
protein_coding	S-locus lectin protein kinase family protein	NA	S-locus lectin protein kinase family protein; FUNCTIONS IN: in 6 functions; INVOLVED IN: protein amino acid phosphorylation, recognition of pollen; EXPRESSED IN: 21 plant structures; EXPRESSED DURING: 13 growth stages; CONTAINS InterPro DOMAIN/s: Curculin-like (mannose-binding) lectin (InterPro:IPR001480), Protein kinase, ATP binding site (InterPro:IPR017441), PAN-2 domain (InterPro:IPR013227), A…	AT1G61360	0.831958	0.198053	1.66369	-0.688568	2.94406	0.792715	-0.607281	0.58676	0.830664	4.71697	1.18172	1.63095	-0.571258	-0.528683		1	0.884962	0.0603599	0.743972	0.0364833	1	0.842428	0.714443	0.526038	1.2e-07	0.0437239	0.0246032	0.645198	1.1612
protein_coding	octadecanoid-responsive Arabidopsis AP2/ERF 59	encodes a member of the ERF (ethylene response factor) subfamily B-3 of ERF/AP2 transcription factor family. The protein contains one AP2 domain. There are 18 members in this subfamily including ATERF-1, ATERF-2, AND ATERF-5.	octadecanoid-responsive Arabidopsis AP2/ERF 59 (ORA59); CONTAINS InterPro DOMAIN/s: DNA-binding, integrase-type (InterPro:IPR016177), Pathogenesis-related transcriptional factor/ERF, DNA-binding (InterPro:IPR001471); BEST Arabidopsis thaliana protein match is: ethylene-responsive element binding factor 15 (TAIR:AT2G31230.1); Has 6527 Blast hits to 6261 proteins in 388 species: Archae - 0; Bacteri…	AT1G06160	2.73125	2.64499	0.7401	2.78375	4.21296	1.58255	1.12361	0.469546	NE	4.21379	1.38045	1.44039	0.220188	0.122295		0.999532	0.000330416	0.499018	0.113879	1.93e-14	1	0.458423	0.543283	NA	2.15e-09	0.0420566	0.0425272	1.19441	1.19365
protein_coding	Protein kinase family protein with leucine-rich repeat domain	NA	Protein kinase family protein with leucine-rich repeat domain; FUNCTIONS IN: kinase activity; INVOLVED IN: protein amino acid phosphorylation; LOCATED IN: plasma membrane, membrane; EXPRESSED IN: 23 plant structures; EXPRESSED DURING: 14 growth stages; CONTAINS InterPro DOMAIN/s: Protein kinase, ATP binding site (InterPro:IPR017441), Protein kinase, catalytic domain (InterPro:IPR000719), Leucine-…	AT5G25930	2.25763	-0.760155	1.67342	0.218973	2.66378	-0.480385	-0.598766	0.933933	0.841213	1.56232	2.28449	2.75084	0.701529	0.492396		0.999532	0.577188	0.0326645	0.96828	1.79e-05	1	0.775993	0.334649	0.335224	0.245566	0.00197794	0.002275	0.622243	1.02445
protein_coding	Protein of unknown function (DUF1218)	NA	Protein of unknown function (DUF1218); FUNCTIONS IN: molecular_function unknown; INVOLVED IN: biological_process unknown; LOCATED IN: endomembrane system; EXPRESSED IN: 9 plant structures; EXPRESSED DURING: LP.06 six leaves visible, LP.04 four leaves visible, 4 anthesis, petal differentiation and expansion stage; CONTAINS InterPro DOMAIN/s: Protein of unknown function DUF1218 (InterPro:IPR009606)…	AT4G19370	1.11455	NE	1.22838	-0.470906	2.01166	-0.218548	NE	NE	-0.642453	0.730762	2.33886	2.88666	-0.154681	-0.0134167		1	NA	0.313587	0.903971	0.00364167	1	NA	NA	0.905511	0.792856	0.00170312	0.00142754	1.09919	0.951854
protein_coding	cyclic nucleotide gated channel 10	member of Cyclic nucleotide gated channel family	cyclic nucleotide gated channel 10 (CNGC10); FUNCTIONS IN: ion channel activity, cyclic nucleotide binding, calmodulin binding; INVOLVED IN: ion transport, transmembrane transport; LOCATED IN: membrane; EXPRESSED IN: 14 plant structures; EXPRESSED DURING: 10 growth stages; CONTAINS InterPro DOMAIN/s: Cyclic nucleotide-binding (InterPro:IPR000595), Cyclic nucleotide-binding-like (InterPro:IPR01849…	AT1G01340	1.84709	NE	NE	1.36402	3.07101	1.35392	NE	NE	NE	1.92762	2.06939	2.69471	0.120427	0.0928928		1	NA	NA	0.672934	0.00250787	1	NA	NA	NA	0.367765	0.00335796	0.00267273	1.19718	1.21332
pseudogene	NA	NA	pseudogene, leucine rich repeat protein family, contains leucine rich-repeat domains Pfam:PF00560, INTERPRO:IPR001611; contains some similarity to Cf-4 (Lycopersicon hirsutum) gi|2808683|emb|CAA05268; blastp match of 37% identity and 8.4e-98 P-value to GP|2808683|emb|CAA05268.1||AJ002235 Cf-4 {Lycopersicon hirsutum}	AT2G24160	1.25933	-0.0123515	0.417749	1.98354	2.14724	0.74152	0.218855	-0.943306	0.839466	0.47776	2.86899	3.01991	-0.139132	0.207608		1	1	0.705574	0.112715	0.000307562	1	0.985838	0.441126	0.667711	0.903811	0.000451613	0.00120968	1.09256	1.17798
protein_coding	cytochrome P450, family 71, subfamily B, polypeptide 3	cytochrome P450 monooxygenase	cytochrome P450, family 71, subfamily B, polypeptide 3 (CYP71B3); FUNCTIONS IN: electron carrier activity, monooxygenase activity, iron ion binding, oxygen binding, heme binding; INVOLVED IN: oxidation reduction; EXPRESSED IN: 13 plant structures; EXPRESSED DURING: 9 growth stages; CONTAINS InterPro DOMAIN/s: Cytochrome P450 (InterPro:IPR001128), Cytochrome P450, E-class, group I (InterPro:IPR002…	AT3G26220	0.795175	0.0581596	0.196874	1.16166	2.03117	1.04587	0.0691678	-0.777026	0.344606	0.951804	1.82717	2.19007	-0.0895148	-0.0477863		1	0.923471	0.831065	0.282045	0.000800266	1	1	0.409483	0.93698	0.342825	0.00697447	0.00701805	1.0545	1.14566
protein_coding	PDI-like 1-3	Encodes a protein disulfide isomerase-like (PDIL) protein, a member of a multigene family within the thioredoxin (TRX) superfamily. Transcript levels for this gene are up-regulated in response to three different chemical inducers of ER stress (dithiothreitol, beta-mercaptoethanol, and tunicamycin). Neither AtIRE1-2 nor AtbZIP60 appear to be required for this response.	PDI-like 1-3 (PDIL1-3); FUNCTIONS IN: protein disulfide isomerase activity; INVOLVED IN: response to endoplasmic reticulum stress; LOCATED IN: endoplasmic reticulum, plasma membrane; EXPRESSED IN: 26 plant structures; EXPRESSED DURING: 13 growth stages; CONTAINS InterPro DOMAIN/s: Thioredoxin fold (InterPro:IPR012335), Thioredoxin domain (InterPro:IPR013766), Thioredoxin, conserved site (InterPro…	AT3G54960	0.276308	0.48211	0.5527	1.10574	1.71829	-0.389013	-0.0213883	-0.270413	0.484485	0.592602	1.82248	2.33439	-0.0472037	-0.232909		1	0.511112	0.465975	0.0646772	2.08e-09	1	1	0.829696	0.390054	0.384742	0.00713821	0.00538333	1.05403	1.03356
protein_coding	Leucine-rich receptor-like protein kinase family protein	member of Receptor kinase-like protein family	HAESA (HAE); CONTAINS InterPro DOMAIN/s: Protein kinase, ATP binding site (InterPro:IPR017441), Protein kinase, catalytic domain (InterPro:IPR000719), Leucine-rich repeat-containing N-terminal domain, type 2 (InterPro:IPR013210), Leucine-rich repeat (InterPro:IPR001611), Serine/threonine-protein kinase-like domain (InterPro:IPR017442), Protein kinase-like domain (InterPro:IPR011009), Serine/threo…	AT4G28490	0.542941	0.269213	1.01345	0.815813	1.44545	-0.752959	-0.0738168	-0.300452	0.456805	0.46048	1.97578	2.08911	-0.00463336	-0.122409		1	0.852299	0.176352	0.358253	0.00230662	1	0.963688	0.842798	0.55383	0.808747	0.00447805	0.00873734	1.04063	0.999454
protein_coding	Calcium-dependent phosphotriesterase superfamily protein	Although this enzyme is predicted to encode a strictosidine synthase (SS), it lacks a conserved catalytic glutamate residue found in active SS enzymes and it is not expected to have SS activity.	YELLOW-LEAF-SPECIFIC GENE 2 (YLS2); CONTAINS InterPro DOMAIN/s: Strictosidine synthase (InterPro:IPR004141), Strictosidine synthase, conserved region (InterPro:IPR018119), Six-bladed beta-propeller, TolB-like (InterPro:IPR011042); BEST Arabidopsis thaliana protein match is: Calcium-dependent phosphotriesterase superfamily protein (TAIR:AT3G51440.1).	AT3G51430	1.22825	0.409349	0.732387	0.806831	1.08883	-0.217229	-0.115732	-0.227411	-0.0451218	0.579475	1.7499	1.55811	0.339252	-0.39275		1	0.595166	0.307815	0.0982925	0.000381458	1	0.90887	0.782799	0.837073	0.349772	0.00856115	0.0293783	0.990507	1.16506
protein_coding	Eukaryotic aspartyl protease family protein	NA	Eukaryotic aspartyl protease family protein; FUNCTIONS IN: aspartic-type endopeptidase activity; INVOLVED IN: proteolysis; LOCATED IN: endomembrane system; EXPRESSED IN: 24 plant structures; EXPRESSED DURING: 13 growth stages; CONTAINS InterPro DOMAIN/s: Peptidase aspartic (InterPro:IPR021109), Peptidase aspartic, catalytic (InterPro:IPR009007), Peptidase A1 (InterPro:IPR001461), Peptidase aspart…	AT1G49050	1.26736	0.390598	0.693949	0.521231	0.968703	-0.309698	-0.145228	-0.299724	-0.439413	0.0310983	1.69247	1.78394	-0.327661	-0.528057		1	0.529668	0.439654	0.398892	0.00367158	1	1	0.915309	0.87893	1	0.00961856	0.016993	1.02035	1.15159
protein_coding	BAK1-interacting receptor-like kinase 1	Encodes a BAK1-interacting receptor-like kinase named BIR1. Negatively regulates multiple plant resistance signaling pathways, one of which is the SOBIR1(AT2G31880)-dependent pathway.	BAK1-interacting receptor-like kinase 1 (BIR1); FUNCTIONS IN: protein kinase activity; INVOLVED IN: negative regulation of defense response; LOCATED IN: plasma membrane; EXPRESSED IN: 23 plant structures; EXPRESSED DURING: 13 growth stages; CONTAINS InterPro DOMAIN/s: Protein kinase, catalytic domain (InterPro:IPR000719), Leucine-rich repeat-containing N-terminal domain, type 2 (InterPro:IPR01321…	AT5G48380	0.773071	0.560915	0.629984	0.895447	1.24409	-0.160899	-0.0983248	-0.571337	-0.0926795	0.343389	1.50825	1.76472	-0.524214	-0.207064		1	0.184107	0.443047	0.039841	2.7e-07	1	1	0.613113	0.923668	0.527305	0.0159037	0.0177563	0.73587	0.96522
protein_coding	Protein kinase superfamily protein	NA	Protein kinase superfamily protein; FUNCTIONS IN: protein serine/threonine kinase activity, protein kinase activity, kinase activity, ATP binding; INVOLVED IN: protein amino acid phosphorylation; LOCATED IN: cellular_component unknown; EXPRESSED IN: 20 plant structures; EXPRESSED DURING: 12 growth stages; CONTAINS InterPro DOMAIN/s: Protein kinase, ATP binding site (InterPro:IPR017441), Protein k…	AT3G09010	0.868483	-0.0286689	0.677581	1.2584	2.08686	NE	-0.279207	-0.214656	0.205332	0.6297	1.51891	2.10181	0.188974	0.292795		1	0.894895	0.442079	0.493341	0.00107917	NA	1	0.80581	0.9966	0.582758	0.0163802	0.00864309	1.20377	1.15472
protein_coding	Ribosomal protein L18ae family	NA	Ribosomal protein L18ae family; BEST Arabidopsis thaliana protein match is: unknown protein (TAIR:AT5G57060.1); Has 82 Blast hits to 82 proteins in 12 species: Archae - 0; Bacteria - 0; Metazoa - 0; Fungi - 0; Plants - 82; Viruses - 0; Other Eukaryotes - 0 (source: NCBI BLink).	AT4G26060	1.49276	0.13519	0.59278	1.36184	1.83936	-0.115169	-0.199854	-0.0986195	0.688181	1.24222	1.76305	1.79534	0.330026	-0.364002		1	0.802445	0.448338	0.0183851	6.01e-07	1	0.926599	0.95125	0.298687	0.0107855	0.00778846	0.0163872	1.06329	1.07132
protein_coding	arogenate dehydratase 4	Encodes a plastid-localized arogenate dehydratase involved in phenylalanine biosynthesis. Not less than six genes encoding ADT were identi&#64257;ed in the Arabidopsis genome: ADT1 [At1g11790]; ADT2 [At3g07630]; ADT3 [At2g27820]; ADT4 [At3g44720]; ADT5 [At5g22630]; and ADT6 [At1g08250].	arogenate dehydratase 4 (ADT4); CONTAINS InterPro DOMAIN/s: Prephenate dehydratase (InterPro:IPR001086), Prephenate dehydratase, conserved site (InterPro:IPR018528); BEST Arabidopsis thaliana protein match is: arogenate dehydratase 5 (TAIR:AT5G22630.1); Has 7069 Blast hits to 7066 proteins in 2218 species: Archae - 179; Bacteria - 3950; Metazoa - 0; Fungi - 120; Plants - 261; Viruses - 0; Other E…	AT3G44720	1.49782	0.0893498	0.883802	0.897755	1.92862	0.64166	-0.372128	0.225514	0.62202	1.05255	1.29475	2.10415	1.44864	0.942283		0.999532	0.941526	0.0961141	0.138149	6.18e-12	1	0.700489	0.613131	0.392945	0.00931942	0.0309608	0.00856634	0.105794	0.169128
protein_coding	FAD/NAD(P)-binding oxidoreductase family protein	Encodes CTF2B.	CTF2B; FUNCTIONS IN: monooxygenase activity; INVOLVED IN: oxidation reduction; LOCATED IN: mitochondrion; EXPRESSED IN: pollen tube; CONTAINS InterPro DOMAIN/s: Monooxygenase, FAD-binding (InterPro:IPR002938); BEST Arabidopsis thaliana protein match is: FAD/NAD(P)-binding oxidoreductase family protein (TAIR:AT2G35660.1); Has 10342 Blast hits to 10313 proteins in 1526 species: Archae - 25; Bacteri…	AT2G29720	2.11326	0.217262	0.69189	0.694356	1.34562	0.58717	-1.0819	-0.0801369	0.894395	0.823204	1.49349	1.63625	-0.0267311	-0.0819513		0.909704	0.846261	0.27365	0.421548	0.000351498	1	0.286504	0.961863	0.0759712	0.0563849	0.0162237	0.0240447	1.06983	0.979092
protein_coding	AIG2-like (avirulence induced gene) family protein	avrRpt2-induced gene that exhibits RPS2- and avrRpt2-dependent induction early after infection with Pseudomonas syringae pv maculicola strain ES4326 carrying avrRpt2	AVRRPT2-INDUCED GENE 2 (AIG2); FUNCTIONS IN: molecular_function unknown; INVOLVED IN: response to bacterium; LOCATED IN: cellular_component unknown; EXPRESSED IN: 16 plant structures; EXPRESSED DURING: 10 growth stages; CONTAINS InterPro DOMAIN/s: Butirosin biosynthesis, BtrG-like (InterPro:IPR013024), AIG2-like (InterPro:IPR009288); BEST Arabidopsis thaliana protein match is: AIG2-like (avirulen…	AT3G28930	2.0318	0.850537	0.567845	1.22162	2.02381	0.348388	0.375129	-0.023371	0.888893	0.825015	1.60863	1.69911	1.04476	0.289108		0.10538	0.0560905	0.364269	0.0362929	5.12e-09	1	0.760001	0.928268	0.04427	0.0897444	0.0122333	0.0211109	0.187854	1.08887
protein_coding	MutT/nudix family protein	Encodes a protein with ADP-ribose hydrolase activity. Negatively regulates EDS1-conditioned plant defense and programmed cell death.	NUDT7; CONTAINS InterPro DOMAIN/s: NUDIX hydrolase domain-like (InterPro:IPR015797), Nudix hydrolase 6-like (InterPro:IPR003293), NUDIX hydrolase domain (InterPro:IPR000086); BEST Arabidopsis thaliana protein match is: nudix hydrolase homolog 6 (TAIR:AT2G04450.1).	AT4G12720	1.62877	0.540193	0.599362	1.12591	1.53935	0.737568	0.194825	-0.0356103	1.07984	0.698143	2.03873	2.46789	0.081667	0.181323		0.755851	0.260378	0.403186	0.0351146	1.27e-06	1	0.921692	1	0.0144246	0.196287	0.00390576	0.0043125	1.14159	1.20045
protein_coding	Calcium-dependent lipid-binding (CaLB domain) family protein	NA	Calcium-dependent lipid-binding (CaLB domain) family protein; CONTAINS InterPro DOMAIN/s: C2 membrane targeting protein (InterPro:IPR018029), C2 calcium/lipid-binding domain, CaLB (InterPro:IPR008973), C2 calcium-dependent membrane targeting (InterPro:IPR000008); BEST Arabidopsis thaliana protein match is: soybean gene regulated by cold-2 (TAIR:AT1G09070.1); Has 30201 Blast hits to 17322 proteins…	AT4G34150	1.4372	0.546694	0.231639	1.16775	0.980577	1.32022	-0.0922231	-0.167009	1.53206	1.01565	1.82283	2.17274	-0.498523	0.0815065		0.847233	0.199766	0.718132	0.0234903	0.00720144	1	1	0.865024	1.48e-06	0.0133658	0.00713525	0.00747586	0.814258	1.20854
protein_coding	NDR1/HIN1-like 3	encodes a protein whose sequence is similar to tobacco hairpin-induced gene (HIN1) and Arabidopsis non-race specific disease resistance gene (NDR1). Expression of this gene is induced by cucumber mosaic virus, spermine and Pseudomonas syringae pv. tomato DC3000. The gene product is localized to the plasma membrane.	NDR1/HIN1-like 3 (NHL3); FUNCTIONS IN: molecular_function unknown; INVOLVED IN: defense response to virus, defense response to bacterium, response to bacterium; LOCATED IN: plasma membrane; EXPRESSED IN: 28 plant structures; EXPRESSED DURING: 13 growth stages; CONTAINS InterPro DOMAIN/s: Late embryogenesis abundant protein, group 2 (InterPro:IPR004864); BEST Arabidopsis thaliana protein match is:…	AT5G06320	1.06894	0.5633	0.279921	0.735287	0.831326	1.12151	0.347058	-0.25807	0.969716	1.06023	1.66416	2.03925	-0.269477	0.486104		1	0.246925	0.718189	0.125873	3.3e-05	1	0.878051	0.798937	0.00144715	3.97e-05	0.0103586	0.00948048	1.08817	0.924411
protein_coding	phytosulfokine 4 precursor	Phytosulfokine 3 precursor, coding for a unique plant peptide growth factor. Plants overexpressing this gene (under a 35S promoter), develop normal cotyledons and hypocotyls but their growth, in particular that of their roots, was faster than that of wildtype.	phytosulfokine 4 precursor (PSK4); FUNCTIONS IN: growth factor activity; INVOLVED IN: cell proliferation, cell differentiation, response to wounding, organ morphogenesis; LOCATED IN: extracellular matrix; EXPRESSED IN: 25 plant structures; EXPRESSED DURING: 10 growth stages; CONTAINS InterPro DOMAIN/s: Phytosulfokine (InterPro:IPR009438); BEST Arabidopsis thaliana protein match is: phytosulfokine…	AT3G49780	1.21285	0.62823	0.403628	1.58738	1.92941	0.817572	0.497852	-0.11008	0.767367	1.03286	1.72663	2.22824	0.157169	0.720976		1	0.481245	0.615502	0.0261163	9.75e-08	1	0.880338	0.944344	0.440401	0.0758065	0.00929268	0.00641791	1.20419	0.688604
protein_coding	phospholipase A 2A	Encodes a lipid acyl hydrolase with wide substrate specificity that accumulates upon infection by fungal and bacterial pathogens. Protein is localized in the cytoplasm in healthy leaves, and in membranes in infected cells. Plays a role in cell death and differentially affects the accumulation of oxylipins. Contributes to resistance to virus.	phospholipase A 2A (PLA2A); FUNCTIONS IN: lipase activity, nutrient reservoir activity; INVOLVED IN: in 6 processes; LOCATED IN: membrane, cytoplasm; EXPRESSED IN: 11 plant structures; EXPRESSED DURING: 8 growth stages; CONTAINS InterPro DOMAIN/s: Acyl transferase/acyl hydrolase/lysophospholipase (InterPro:IPR016035), Patatin (InterPro:IPR002641); BEST Arabidopsis thaliana protein match is: Acyl …	AT2G26560	2.23536	0.389217	0.724391	0.805056	1.31771	1.07858	-0.324438	-0.304325	0.349259	0.463966	2.77158	2.96395	-0.0127419	0.562198		0.503443	0.42768	0.274132	0.106923	3.84e-05	1	0.868426	0.847034	0.399169	0.527305	0.000538462	0.00136923	1.04555	0.751655
protein_coding	glycine-rich protein	NA	glycine-rich protein; Has 24 Blast hits to 24 proteins in 2 species: Archae - 0; Bacteria - 0; Metazoa - 0; Fungi - 0; Plants - 24; Viruses - 0; Other Eukaryotes - 0 (source: NCBI BLink).	AT3G04640	1.13792	0.617378	0.983494	1.06467	2.23705	1.16709	0.00738565	0.323852	0.639251	0.946273	2.63962	3.16026	0.00288925	0.730787		1	0.508481	0.150079	0.223505	8.92e-06	1	1	0.583223	0.601862	0.307193	0.000695652	0.000954545	1.07968	0.22263
protein_coding	RING/U-box superfamily protein	Encodes a RING finger domain protein with E3 ligase activity that is localized to the lipid rafts of the plasma membrane. Expression is increased in response to fungal pathogen. May be involved in regulation of programmed cell death by facilitating degredation of regulation of PDC activators.	RING1; CONTAINS InterPro DOMAIN/s: Zinc finger, RING-type (InterPro:IPR001841), Zinc finger, C3HC4 RING-type (InterPro:IPR018957); BEST Arabidopsis thaliana protein match is: RING/U-box superfamily protein (TAIR:AT1G72220.1); Has 1807 Blast hits to 1807 proteins in 277 species: Archae - 0; Bacteria - 0; Metazoa - 736; Fungi - 347; Plants - 385; Viruses - 0; Other Eukaryotes - 339 (source: NCBI BL…	AT5G10380	-0.326815	-0.124038	0.569615	0.987266	1.26629	-0.307106	-0.659853	-0.468603	0.680821	0.902169	1.95724	3.05978	-0.785155	-0.395886		1	1	0.360206	0.114004	0.000145675	1	0.415112	0.651149	0.133606	0.0310384	0.00496244	0.00112605	0.332542	1.15601
protein_coding	PDI-like 1-2	Encodes a protein disulfide isomerase-like (PDIL) protein, a member of a multigene family within the thioredoxin (TRX) superfamily. Transcript levels for this gene are up-regulated in response to three different chemical inducers of ER stress (dithiothreitol, beta-mercaptoethanol, and tunicamycin). AtIRE1-2 does not appear to be required for this response, but the atbzip60 mutant has a diminished…	PDI-like 1-2 (PDIL1-2); FUNCTIONS IN: protein disulfide isomerase activity; INVOLVED IN: response to cadmium ion, response to salt stress, response to endoplasmic reticulum stress; LOCATED IN: endoplasmic reticulum, plasma membrane, chloroplast; EXPRESSED IN: 28 plant structures; EXPRESSED DURING: 15 growth stages; CONTAINS InterPro DOMAIN/s: Thioredoxin fold (InterPro:IPR012335), Disulphide isom…	AT1G77510	-0.0512011	0.589709	0.837121	1.72915	1.35315	-0.156931	-0.0199716	0.186365	1.51205	0.775862	2.14619	2.79554	0.0497622	-0.192895		1	0.212497	0.11353	0.000637733	1.24e-06	1	1	0.977022	1.19e-05	0.0522506	0.00267949	0.00197419	1.138	1.13977
protein_coding	ADC synthase superfamily protein	Encodes a protein with isochorismate synthase activity. Mutants fail to accumulate salicylic acid. Its function may be redundant with that of ICS2 (AT1G18870).	ENHANCED DISEASE SUSCEPTIBILITY TO ERYSIPHE ORONTII 16 (EDS16); CONTAINS InterPro DOMAIN/s: Chorismate binding, C-terminal (InterPro:IPR015890), ADC synthase (InterPro:IPR005801), Isochorismate synthase (InterPro:IPR004561); BEST Arabidopsis thaliana protein match is: isochorismate synthase 2 (TAIR:AT1G18870.1); Has 35333 Blast hits to 34131 proteins in 2444 species: Archae - 798; Bacteria - 2242…	AT1G74710	-0.779955	0.329879	1.10195	1.71167	1.62529	-0.147404	-0.173037	0.355773	1.39909	1.80496	1.42055	3.6336	-0.610228	-0.178266		1	0.738198	0.100101	0.0377292	0.000965858	1	1	0.859208	0.0570561	0.000515989	0.0187802	0.000318182	0.580471	1.08107
protein_coding	UDP-Glycosyltransferase superfamily protein	NA	UDP-Glycosyltransferase superfamily protein; CONTAINS InterPro DOMAIN/s: UDP-glucuronosyl/UDP-glucosyltransferase (InterPro:IPR002213); BEST Arabidopsis thaliana protein match is: UDP-Glycosyltransferase superfamily protein (TAIR:AT2G30150.1); Has 7928 Blast hits to 7876 proteins in 486 species: Archae - 0; Bacteria - 504; Metazoa - 2238; Fungi - 27; Plants - 5010; Viruses - 79; Other Eukaryotes …	AT2G30140	-0.130118	-0.527971	0.397794	0.398814	1.5099	-0.409108	-1.09302	0.0154203	0.951422	1.51745	3.00096	3.65091	1.74602	-0.211234		1	0.354967	0.497167	0.46702	4.63e-16	1	0.0652315	0.999629	0.00554837	0.00017754	0.00022	0.000307692	0.0805106	1.01873
protein_coding	UDP-galactose transporter 3	NA	UDP-galactose transporter 3 (UTR3); FUNCTIONS IN: pyrimidine nucleotide sugar transmembrane transporter activity; INVOLVED IN: transmembrane transport; LOCATED IN: endomembrane system; EXPRESSED IN: 24 plant structures; EXPRESSED DURING: 15 growth stages; CONTAINS InterPro DOMAIN/s: UAA transporter (InterPro:IPR013657); BEST Arabidopsis thaliana protein match is: UDP-galactose transporter 1 (TAIR…	AT1G14360	-0.655283	-0.779298	0.897025	1.37749	1.92431	-0.619369	-1.11617	0.261375	0.974091	1.23685	2.39327	2.5596	0.643318	-0.150161		1	0.220397	0.0832938	0.00589945	1.24e-12	1	0.19334	0.854921	0.0127837	0.00371757	0.001496	0.00351531	0.454619	1.1544
protein_coding	UDP-galactose transporter 1	Encodes a multitransmembrane hydrophobic protein that functions as transporter of UDP-galactose and UDP-glucose into the Golgi. Localized in the ER. Involved in the unfolded protein response, a mechanism that controls proper protein folding in the ER.	UDP-galactose transporter 1 (UTR1); CONTAINS InterPro DOMAIN/s: UAA transporter (InterPro:IPR013657); BEST Arabidopsis thaliana protein match is: UDP-galactose transporter 3 (TAIR:AT1G14360.1); Has 1052 Blast hits to 1046 proteins in 233 species: Archae - 0; Bacteria - 0; Metazoa - 503; Fungi - 150; Plants - 232; Viruses - 0; Other Eukaryotes - 167 (source: NCBI BLink).	AT2G02810	-0.905346	-0.523117	1.01595	2.08608	2.14255	-0.693163	-1.11321	0.175168	1.03438	0.759907	3.03457	3.21421	0.299199	-0.258987		1	0.622937	0.116919	0.000246901	1.05e-08	1	0.254353	1	0.107966	0.27783	0.00022449	0.000942857	1.15042	1.16051
protein_coding	WRKY DNA-binding protein 18	Pathogen-induced transcription factor. Binds W-box sequences in vitro. Forms protein complexes with itself and with WRKY40 and WRKY60. Constitutive expression of WRKY18 enhanced resistance to P. syringae, but its coexpression with WRKY40 or WRKY60 made plants more susceptible to both P. syringae and B. cinerea. WRKY18, WRKY40, and WRKY60 have partially redundant roles in response to the hemibiotr…	WRKY DNA-binding protein 18 (WRKY18); FUNCTIONS IN: protein binding, sequence-specific DNA binding transcription factor activity; INVOLVED IN: in 7 processes; LOCATED IN: nucleus; EXPRESSED IN: 24 plant structures; EXPRESSED DURING: 13 growth stages; CONTAINS InterPro DOMAIN/s: DNA-binding WRKY (InterPro:IPR003657); BEST Arabidopsis thaliana protein match is: WRKY DNA-binding protein 60 (TAIR:AT2…	AT4G31800	0.298468	-0.151599	0.928415	1.2454	2.5085	-0.0228952	-0.311969	-0.421981	0.471412	1.53006	4.10387	4.78919	1.52516	0.859325		1	0.997216	0.180235	0.076247	7.85e-08	1	0.910241	0.909597	0.522451	0.0849412	0	0	0.101747	0.228345
protein_coding	homolog of carrot EP3-3 chitinase	encodes an EP3 chitinase that is expressed during somatic embryogenesis in 'nursing' cells surrounding the embryos but not in embryos themselves. The gene is also expressed in mature pollen and growing pollen tubes until they enter the receptive synergid, but not in endosperm and integuments as in carrot. Post-embryonically, expression is found in hydathodes, stipules, root epidermis and emerging…	homolog of carrot EP3-3 chitinase (EP3); FUNCTIONS IN: chitinase activity; INVOLVED IN: somatic embryogenesis, plant-type hypersensitive response; LOCATED IN: cell wall; EXPRESSED IN: 18 plant structures; EXPRESSED DURING: 6 growth stages; CONTAINS InterPro DOMAIN/s: Chitin-binding, type 1, conserved site (InterPro:IPR018371), Glycoside hydrolase, family 19 (InterPro:IPR016283), Chitin-binding, t…	AT3G54420	-0.0916489	-0.260045	0.0476729	0.613388	2.97112	-0.288729	-0.532469	0.167913	-0.181827	2.96612	1.82754	2.13132	-0.93036	-0.325777		1	0.975584	1	0.852793	0.000478873	1	0.837639	1	1	0.00098349	0.00709205	0.00788926	0.278618	1.12764
protein_coding	endoplasmic reticulum oxidoreductins 1	endoplasmic reticulum oxidoreductin	endoplasmic reticulum oxidoreductins 1 (ERO1); FUNCTIONS IN: FAD binding, oxidoreductase activity, acting on sulfur group of donors, disulfide as acceptor; INVOLVED IN: oxidation reduction, protein thiol-disulfide exchange; LOCATED IN: endoplasmic reticulum; EXPRESSED IN: 24 plant structures; EXPRESSED DURING: 14 growth stages; CONTAINS InterPro DOMAIN/s: Endoplasmic reticulum oxidoreductin 1 (In…	AT1G72280	0.047559	0.487036	0.821629	0.227786	3.02974	-1.00804	-0.352156	-0.38232	-0.337904	1.78574	1.94008	2.93482	0.329262	0.0186147		1	0.692386	0.356226	0.84663	5.03e-06	1	1	1	1	0.190351	0.00487264	0.001375	1.06716	1.09679
protein_coding	Disease resistance protein (CC-NBS-LRR class) family	Encodes a NBS-LRR disease resistance protein that possesses N-terminal kinase subdomains. Activation tagged mutant of ADR1 showed elevated levels of SA and reactive oxygen species in addition to number of defense gene transcripts. Exhibits resistance to number of microbial pathogens.	ACTIVATED DISEASE RESISTANCE 1 (ADR1); FUNCTIONS IN: kinase activity; INVOLVED IN: response to water deprivation, response to karrikin, response to other organism, defense response; LOCATED IN: endomembrane system; EXPRESSED IN: 21 plant structures; EXPRESSED DURING: 13 growth stages; CONTAINS InterPro DOMAIN/s: NB-ARC (InterPro:IPR002182), Powdery mildew resistance protein, RPW8 domain (InterPro…	AT1G33560	0.0982036	0.710988	0.93162	0.267736	2.89892	-0.144654	0.522482	-0.217037	0.403154	2.00338	1.25253	1.78737	-0.112485	-0.120637		1	0.531818	0.166499	0.816594	1.78e-05	1	0.753743	0.99643	0.54832	0.0325172	0.0315919	0.0164509	1.08358	0.956363
protein_coding	Class I glutamine amidotransferase-like superfamily protein	Encodes protease I (pfpI)-like protein YLS5.	YLS5; INVOLVED IN: response to ethylene stimulus, response to salt stress, leaf senescence, response to abscisic acid stimulus; LOCATED IN: endomembrane system; EXPRESSED IN: 23 plant structures; EXPRESSED DURING: 13 growth stages; CONTAINS InterPro DOMAIN/s: ThiJ/PfpI (InterPro:IPR002818); BEST Arabidopsis thaliana protein match is: Class I glutamine amidotransferase-like superfamily protein (TA…	AT2G38860	0.45713	0.853028	1.27035	1.10342	2.16499	-0.745788	-0.300098	-0.12291	1.55988	2.05221	2.10617	2.44699	1.19868	-0.456731		1	0.110737	0.0367097	0.078196	5.32e-12	1	0.954887	0.854202	0.000175033	1.4e-08	0.0031716	0.0042891	0.148081	1.14705
protein_coding	NA	NA	unknown protein; FUNCTIONS IN: molecular_function unknown; INVOLVED IN: biological_process unknown; LOCATED IN: endomembrane system; EXPRESSED IN: 14 plant structures; EXPRESSED DURING: 9 growth stages; BEST Arabidopsis thaliana protein match is: unknown protein (TAIR:AT1G65486.1); Has 23 Blast hits to 23 proteins in 2 species: Archae - 0; Bacteria - 0; Metazoa - 0; Fungi - 0; Plants - 23; Viruse…	AT1G65500	1.10549	1.30244	1.56411	1.2796	2.75669	-0.539514	-0.0634822	0.106188	0.751297	2.77902	1.38372	1.73924	-0.481457	-0.71326		1	0.0185459	0.00581539	0.0681772	8.27e-09	1	0.987484	0.927136	0.319749	2.58e-06	0.0306028	0.0198736	0.801957	1.10196
protein_coding	conserved peptide upstream open reading frame 49	Upstream open reading frames (uORFs) are small open reading frames found in the 5' UTR of a mature mRNA, and can potentially mediate translational regulation of the largest, or major, ORF (mORF). CPuORF49 represents a conserved upstream opening reading frame relative to major ORF AT4G36990.1	conserved peptide upstream open reading frame 49 (CPuORF49); LOCATED IN: endomembrane system; Has 30201 Blast hits to 17322 proteins in 780 species: Archae - 12; Bacteria - 1396; Metazoa - 17338; Fungi - 3422; Plants - 5037; Viruses - 0; Other Eukaryotes - 2996 (source: NCBI BLink).	AT4G36988	0.28786	1.49494	1.09731	0.942289	2.27941	-0.331917	0.744297	-0.157428	0.533677	1.89091	1.53917	2.24742	1.24367	0.012258		1	0.0641831	0.0701293	0.393755	1.03e-08	1	0.796319	0.987176	0.583729	0.000181804	0.015726	0.00631579	0.141531	1.09444
protein_coding	NA	NA	unknown protein; FUNCTIONS IN: molecular_function unknown; INVOLVED IN: biological_process unknown; LOCATED IN: endomembrane system; EXPRESSED IN: 17 plant structures; EXPRESSED DURING: 10 growth stages; Has 35333 Blast hits to 34131 proteins in 2444 species: Archae - 798; Bacteria - 22429; Metazoa - 974; Fungi - 991; Plants - 531; Viruses - 0; Other Eukaryotes - 9610 (source: NCBI BLink).	AT5G64510	-0.732107	0.564897	1.18483	-0.148873	2.5488	0.228535	0.318956	0.763582	-0.0618058	2.32785	2.22746	2.56213	-0.0232853	-0.710125		1	0.661786	0.263971	0.909379	0.000168372	1	0.979817	0.40432	0.944016	0.000323349	0.00212766	0.00331414	1.05721	0.799356
protein_coding	DNAJ heat shock N-terminal domain-containing protein	J domain protein localized in ER lumen. Can compensate for the growth defect in jem1 scj1 mutant yeast. Also shows similarity to HSP40 proteins and is induced by heat stress. At high temperatures, mutant alleles are not transmitted through the pollen due to defects in pollen tube growth.	ATERDJ3A; CONTAINS InterPro DOMAIN/s: Molecular chaperone, heat shock protein, Hsp40, DnaJ (InterPro:IPR015609), Heat shock protein DnaJ, N-terminal (InterPro:IPR001623), Heat shock protein DnaJ (InterPro:IPR003095), Thioredoxin-like fold (InterPro:IPR012336), Heat shock protein DnaJ, conserved site (InterPro:IPR018253); BEST Arabidopsis thaliana protein match is: DNAJ heat shock family protein (…	AT3G08970	-0.0288753	-0.172871	0.798508	1.66081	3.17166	0.360757	0.294847	-0.0182221	1.93563	2.52153	1.66367	2.04909	0.196202	-0.140785		1	1	0.640437	0.49489	0.0021135	1	1	0.997235	0.272635	0.0602752	0.00971044	0.00921981	1.20233	1.14186
protein_coding	Arabidopsis phospholipase-like protein (PEARLI 4) family	NA	Arabidopsis phospholipase-like protein (PEARLI 4) family; FUNCTIONS IN: molecular_function unknown; INVOLVED IN: response to karrikin; LOCATED IN: cellular_component unknown; EXPRESSED IN: 15 plant structures; EXPRESSED DURING: 10 growth stages; CONTAINS InterPro DOMAIN/s: Phospholipase-like, arabidopsis (InterPro:IPR007942); BEST Arabidopsis thaliana protein match is: Arabidopsis phospholipase-l…	AT4G35110	-0.210125	0.0286968	0.0398846	1.87916	1.72767	-0.582301	0.243237	0.0652869	1.72696	1.64529	1.16566	2.3264	-0.014957	-0.0720269		1	1	0.903636	0.117134	0.0014278	1	0.898471	0.690228	0.128667	0.0135173	0.0443378	0.00521702	1.01736	0.952498
protein_coding	BRI1-like 3	Similar to BRI, brassinosteroid receptor protein.	BRI1-like 3 (BRL3); FUNCTIONS IN: protein serine/threonine kinase activity, protein kinase activity, ATP binding; INVOLVED IN: protein amino acid phosphorylation; LOCATED IN: plasma membrane; EXPRESSED IN: 19 plant structures; EXPRESSED DURING: 8 growth stages; CONTAINS InterPro DOMAIN/s: Protein kinase, ATP binding site (InterPro:IPR017441), Protein kinase, catalytic domain (InterPro:IPR000719),…	AT3G13380	-0.852834	-0.27997	0.671721	2.51977	2.81834	-1.79255	0.0908864	0.162417	1.66811	1.99014	0.692281	1.55182	-0.210827	-0.218411		1	1	0.471302	0.00979512	2.21e-05	1	0.971207	0.95779	0.0988564	0.0696187	0.268234	0.0298571	1.09946	1.04523
protein_coding	Chitinase family protein	NA	Chitinase family protein; FUNCTIONS IN: chitinase activity; INVOLVED IN: cell wall macromolecule catabolic process; LOCATED IN: endomembrane system; EXPRESSED IN: 22 plant structures; EXPRESSED DURING: 13 growth stages; CONTAINS InterPro DOMAIN/s: Glycoside hydrolase, family 19, catalytic (InterPro:IPR000726); BEST Arabidopsis thaliana protein match is: Chitinase family protein (TAIR:AT2G43590.1).	AT3G47540	0.412956	-0.573945	0.22183	0.444213	1.7766	-0.336616	-0.953818	-0.058398	0.132498	1.87401	0.987819	1.54989	0.12294	-0.137389		1	0.332457	0.792535	0.646921	0.000224416	1	0.195956	0.959291	0.866834	0.000246501	0.0894783	0.0296749	1.18722	0.969423
protein_coding	calcium-dependent protein kinase 29	member of Calcium Dependent Protein Kinase	calcium-dependent protein kinase 29 (CPK29); FUNCTIONS IN: in 6 functions; INVOLVED IN: protein amino acid phosphorylation; LOCATED IN: nucleus, plasma membrane, cytoplasm; EXPRESSED IN: 23 plant structures; EXPRESSED DURING: 13 growth stages; CONTAINS InterPro DOMAIN/s: Protein kinase, ATP binding site (InterPro:IPR017441), EF-Hand 1, calcium-binding site (InterPro:IPR018247), Serine/threonine-p…	AT1G76040	0.507105	-0.195746	0.557715	0.962553	1.82319	0.0312754	-0.714611	-0.60841	0.199031	0.711798	1.4417	2.25156	-0.37446	0.296329		1	0.964952	0.639244	0.240115	6.12e-05	1	0.912265	0.480246	0.727197	0.458807	0.0189534	0.00626996	0.970555	1.16233
protein_coding	glycosyl hydrolase family 81 protein	NA	glycosyl hydrolase family 81 protein; FUNCTIONS IN: hydrolase activity, acting on glycosyl bonds, endo-1,3(4)-beta-glucanase activity; INVOLVED IN: response to cyclopentenone; EXPRESSED IN: 23 plant structures; EXPRESSED DURING: 13 growth stages; CONTAINS InterPro DOMAIN/s: Glycoside hydrolase, family 81 (InterPro:IPR005200); BEST Arabidopsis thaliana protein match is: glycosyl hydrolase family 8…	AT5G15870	0.0188188	0.210281	0.798336	1.54286	2.48243	0.205775	-0.538419	0.159516	0.374367	1.24148	1.13933	1.73658	-0.225743	0.0223057		1	0.947071	0.284846	0.0671556	3.15e-08	1	0.817588	0.7521	0.638861	0.147299	0.0560224	0.0196272	1.09793	1.17064
protein_coding	Protein kinase superfamily protein	NA	Protein kinase superfamily protein; FUNCTIONS IN: protein kinase activity, kinase activity, ATP binding; INVOLVED IN: protein amino acid phosphorylation, N-terminal protein myristoylation; LOCATED IN: nucleus, cytoplasm; EXPRESSED IN: 15 plant structures; EXPRESSED DURING: 9 growth stages; CONTAINS InterPro DOMAIN/s: Protein kinase, catalytic domain (InterPro:IPR000719), Serine-threonine/tyrosine…	AT5G25440	0.0107719	-0.390975	0.41238	1.36398	2.28786	-0.631465	-1.17308	-0.874796	-0.590894	0.237727	1.77651	1.69768	-0.537103	0.0797418		1	0.707798	0.690942	0.012836	5.36e-14	1	0.160973	0.805668	0.598663	1	0.00764567	0.0217918	0.719686	1.14657
protein_coding	Sec14p-like phosphatidylinositol transfer family protein	NA	Sec14p-like phosphatidylinositol transfer family protein; CONTAINS InterPro DOMAIN/s: Cellular retinaldehyde-binding/triple function, C-terminal (InterPro:IPR001251); BEST Arabidopsis thaliana protein match is: Sec14p-like phosphatidylinositol transfer family protein (TAIR:AT4G36640.1); Has 35333 Blast hits to 34131 proteins in 2444 species: Archae - 798; Bacteria - 22429; Metazoa - 974; Fungi - …	AT1G75170	-0.869659	-0.230158	1.82917	0.185869	0.644446	-0.63041	-0.449007	0.292711	0.392034	0.640542	1.18083	2.03758	0.355259	-0.291604		1	0.992268	0.00135139	0.769054	0.611055	1	0.931451	0.638866	0.421213	0.460633	0.0443782	0.00947605	1.02719	1.13578
protein_coding	protein kinase family protein	NA	AP4.3A; FUNCTIONS IN: protein serine/threonine kinase activity, protein kinase activity, ATP binding; INVOLVED IN: protein amino acid phosphorylation; LOCATED IN: plasma membrane; EXPRESSED IN: 19 plant structures; EXPRESSED DURING: 10 growth stages; CONTAINS InterPro DOMAIN/s: Protein kinase, ATP binding site (InterPro:IPR017441), Serine/threonine-protein kinase domain (InterPro:IPR002290), Seri…	AT2G32800	-0.769155	-0.408297	0.0129842	0.18521	1.1891	-0.783821	-0.174415	-0.477023	-0.220252	0.727129	0.889758	1.75739	0.135637	0.021882		1	0.676351	0.912554	0.701654	1.63e-05	1	0.962955	0.682444	1	0.0545818	0.106898	0.0181119	1.19642	1.20513
protein_coding	Calcium-dependent protein kinase family protein	Encodes calcium dependent protein kinase 6 (CPK6), a member of the Arabidopsis CDPK gene family. CDPKs contain an intrinsic Ca2+-activation domain with four EF hand Ca2+-binding sites. CDPKs protein kinases have been proposed to function in multiple plant signal transduction pathways downstream of [Ca2+]cyt elevations, thus transducing various physiological responses. CPK6 is expressed in both gu…	calcium dependent protein kinase 6 (CPK6); FUNCTIONS IN: in 6 functions; INVOLVED IN: regulation of anion channel activity, protein amino acid phosphorylation, N-terminal protein myristoylation, abscisic acid mediated signaling pathway, regulation of stomatal movement; LOCATED IN: cytosol, plasma membrane, membrane; EXPRESSED IN: 26 plant structures; EXPRESSED DURING: 15 growth stages; CONTAINS I…	AT2G17290	-0.31865	-0.0752439	0.302798	0.402314	1.69146	-0.665892	-0.026221	-0.190901	0.156718	0.864588	1.25222	1.82454	-0.178216	0.731245		1	1	0.738997	0.69822	0.000330056	1	1	0.921076	0.908577	0.25411	0.038275	0.015485	1.09972	0.797817
protein_coding	cinnamyl-alcohol dehydrogenase	NA	cinnamyl-alcohol dehydrogenase (CAD1); FUNCTIONS IN: oxidoreductase activity, oxidoreductase activity, acting on the CH-OH group of donors, NAD or NADP as acceptor, zinc ion binding, cofactor binding; INVOLVED IN: lignin biosynthetic process; EXPRESSED IN: 25 plant structures; EXPRESSED DURING: 13 growth stages; CONTAINS InterPro DOMAIN/s: GroES-like (InterPro:IPR011032), D-isomer specific 2-hydr…	AT1G72680	-0.110279	-0.423449	0.818474	0.346858	1.41185	-0.0854737	-0.393796	0.249588	0.483157	1.14527	1.68315	1.99808	0.397714	-0.25176		1	0.748771	0.126644	0.874388	0.000318013	1	0.927979	0.5127	0.454019	0.0363397	0.00959862	0.0102933	0.924241	0.990692
protein_coding	Protein of unknown function (DUF833)	NA	Protein of unknown function (DUF833); FUNCTIONS IN: molecular_function unknown; INVOLVED IN: biological_process unknown; LOCATED IN: endomembrane system; EXPRESSED IN: 22 plant structures; EXPRESSED DURING: 15 growth stages; CONTAINS InterPro DOMAIN/s: Protein of unknown function DUF833 (InterPro:IPR008551); BEST Arabidopsis thaliana protein match is: Protein of unknown function (DUF833) (TAIR:AT…	AT4G38260	0.240113	0.0690464	0.488189	0.175375	1.08602	-0.419219	-0.793235	-0.203907	-0.0658715	0.875334	1.1501	1.08651	0.15901	-0.11777		1	0.943504	0.464391	0.87219	0.00125253	1	0.353572	0.789887	1	0.0371655	0.0494079	0.0976254	1.19423	0.986784
protein_coding	alpha-galactosidase 1	NA	alpha-galactosidase 1 (AGAL1); FUNCTIONS IN: alpha-galactosidase activity, hydrolase activity, hydrolyzing O-glycosyl compounds, catalytic activity; INVOLVED IN: carbohydrate metabolic process, metabolic process, lactose catabolic process; LOCATED IN: apoplast, cell wall, plant-type cell wall; EXPRESSED IN: 21 plant structures; EXPRESSED DURING: 13 growth stages; CONTAINS InterPro DOMAIN/s: Glyco…	AT5G08380	-0.15168	-0.365766	0.64348	0.257571	0.929543	-0.247484	-0.704868	-0.0810616	0.0483135	0.93308	1.23995	1.39812	0.0298933	-0.332295		1	0.580375	0.176822	0.66938	0.00276828	1	0.441004	0.95341	0.761005	0.0036991	0.0347132	0.0421709	1.1076	1.03046
protein_coding	NA	NA	FUNCTIONS IN: molecular_function unknown; INVOLVED IN: response to oxidative stress; LOCATED IN: endomembrane system; EXPRESSED IN: 22 plant structures; EXPRESSED DURING: 13 growth stages; CONTAINS InterPro DOMAIN/s: Folate receptor, conserved region (InterPro:IPR018143).	AT5G27830	0.239151	-0.128152	0.641162	0.496431	1.22097	-0.139126	-0.0469227	0.129446	-0.293014	0.411114	1.21385	1.67646	-0.0818625	-0.162104		1	1	0.394943	0.352406	3.94e-05	1	1	0.845207	0.916934	0.549504	0.0373645	0.0221034	1.09884	0.979251
protein_coding	MAP kinase kinase 2	encodes a MAP kinase kinase 2 that regulates MPK6 and MPK4 in response to cold and salt stresses. Co-expression with MEKK1 in protoplasts activated MKK2 activity, suggesting that MEKK1 may be a regulator of MKK2.	MAP kinase kinase 2 (MKK2); FUNCTIONS IN: MAP kinase kinase activity, kinase activity; INVOLVED IN: cold acclimation, MAPKKK cascade, response to salt stress, response to cold, defense response, incompatible interaction; LOCATED IN: plasma membrane, cytoplasm; EXPRESSED IN: 23 plant structures; EXPRESSED DURING: 13 growth stages; CONTAINS InterPro DOMAIN/s: Protein kinase, ATP binding site (Inter…	AT4G29810	-0.492635	-0.0615553	0.348735	0.926253	0.92845	-0.37693	-0.224619	-0.07273	0.212532	0.299603	1.72804	1.53752	-0.178415	-0.336404		1	1	0.632925	0.0570876	0.00849676	1	0.904701	1	0.698429	0.56259	0.00909964	0.0313586	1.09669	1.06772
protein_coding	Cupredoxin superfamily protein	Encodes LPR2. Function together with LPR1 (AT1G23010) and a P5-type ATPase (At5g23630/PDR2) in a common pathway that adjusts root meristem activity to Pi (inorganic phosphate) availability.	Low Phosphate Root2 (LPR2); FUNCTIONS IN: oxidoreductase activity, copper ion binding; INVOLVED IN: cellular response to phosphate starvation, meristem maintenance; LOCATED IN: cell wall, membrane; EXPRESSED IN: 22 plant structures; EXPRESSED DURING: 13 growth stages; CONTAINS InterPro DOMAIN/s: Cupredoxin (InterPro:IPR008972), Multicopper oxidase, type 2 (InterPro:IPR011706), Multicopper oxidase…	AT1G71040	-0.162595	-0.209193	0.151706	0.744638	1.02254	-0.542917	-0.499256	-0.449347	0.357043	0.922386	1.25263	1.53188	-0.957013	-0.245215		1	0.812808	0.931202	0.159761	0.000209126	1	0.680686	0.551236	0.37796	0.065545	0.0328046	0.0297021	0.225079	1.04427
protein_coding	Aldolase-type TIM barrel family protein	NA	Aldolase-type TIM barrel family protein; FUNCTIONS IN: indole-3-glycerol-phosphate synthase activity, copper ion binding; INVOLVED IN: tryptophan biosynthetic process; LOCATED IN: chloroplast; EXPRESSED IN: 24 plant structures; EXPRESSED DURING: 15 growth stages; CONTAINS InterPro DOMAIN/s: Aldolase-type TIM barrel (InterPro:IPR013785), Ribulose-phosphate binding barrel (InterPro:IPR011060), Indo…	AT2G04400	0.169408	-0.345965	0.206621	0.484755	1.52251	-0.949024	-0.725474	-0.352415	0.261664	0.891602	1.40192	1.70269	2.17314	0.132023		1	0.624518	0.762794	0.383752	1.3e-13	1	0.384302	0.702445	0.477859	0.00648311	0.0227116	0.0214569	0.0506687	1.21798
protein_coding	tryptophan biosynthesis 1	Encodes the tryptophan biosynthetic enzyme phosphoribosylanthranilate transferase (PAT1, called trpD in bacteria). Converts anthranilate and phosphoribosylpyrophosphate into phosphoribosylanthranilate and inorganic pyrophosphate.	tryptophan biosynthesis 1 (TRP1); FUNCTIONS IN: anthranilate phosphoribosyltransferase activity; INVOLVED IN: tryptophan biosynthetic process; LOCATED IN: chloroplast stroma, chloroplast, chloroplast envelope; EXPRESSED IN: 21 plant structures; EXPRESSED DURING: 13 growth stages; CONTAINS InterPro DOMAIN/s: Glycosyl transferase, family 3, N-terminal (InterPro:IPR017459), Anthranilate phosphoribos…	AT5G17990	0.176333	-0.181496	0.0700381	1.06191	1.6171	-0.911854	-0.698322	-0.560115	0.526241	0.443927	1.07063	1.46207	1.26832	0.0250721		1	0.879028	0.915975	0.0633164	4.92e-14	1	0.564904	0.356322	0.186211	0.359477	0.0585737	0.0355325	0.134861	1.20175
protein_coding	PLATZ transcription factor family protein	NA	PLATZ transcription factor family protein; CONTAINS InterPro DOMAIN/s: Protein of unknown function DUF597 (InterPro:IPR006734); BEST Arabidopsis thaliana protein match is: PLATZ transcription factor family protein (TAIR:AT4G17900.2); Has 35333 Blast hits to 34131 proteins in 2444 species: Archae - 798; Bacteria - 22429; Metazoa - 974; Fungi - 991; Plants - 531; Viruses - 0; Other Eukaryotes - 961…	AT1G32700	-0.0119464	-0.263688	0.0594772	0.356521	1.7041	-0.916476	-0.373877	-0.774802	-0.0240221	1.28424	1.55939	1.29641	0.235385	-0.00032654		1	0.876143	1	0.635789	5.3e-08	1	0.854228	0.164274	0.990235	0.0100588	0.0134457	0.0520809	1.18926	0.978806
protein_coding	Oxoglutarate/iron-dependent oxygenase	NA	Oxoglutarate/iron-dependent oxygenase; FUNCTIONS IN: oxidoreductase activity, acting on paired donors, with incorporation or reduction of molecular oxygen, 2-oxoglutarate as one donor, and incorporation of one atom each of oxygen into both donors, oxidoreductase activity, oxidoreductase activity, acting on paired donors, with incorporation or reduction of molecular oxygen, L-ascorbic acid binding…	AT3G28480	-0.82042	-0.498891	0.267575	0.530371	0.925354	-0.95807	-0.651847	-0.271345	-0.26707	-0.356377	1.59046	1.88027	0.0411189	-0.265665		1	0.392368	0.855029	0.485026	0.00558812	1	0.540922	0.817689	1	0.354752	0.0133468	0.0137289	1.11386	1.07906
protein_coding	2-oxoglutarate (2OG) and Fe(II)-dependent oxygenase superfamily protein	NA	2-oxoglutarate (2OG) and Fe(II)-dependent oxygenase superfamily protein; FUNCTIONS IN: flavonol synthase activity, oxidoreductase activity; INVOLVED IN: flavonoid biosynthetic process; LOCATED IN: cellular_component unknown; EXPRESSED IN: 24 plant structures; EXPRESSED DURING: 15 growth stages; CONTAINS InterPro DOMAIN/s: Oxoglutarate/iron-dependent oxygenase (InterPro:IPR005123); BEST Arabidopsi…	AT3G19010	1.12597	0.428333	-0.370662	0.353787	0.868029	-0.217184	0.38178	-0.939202	0.835413	1.09206	1.46215	1.72871	0.816132	0.269801		1	0.713262	0.814599	0.633642	0.0130134	1	0.895437	0.0907173	0.044533	0.00788375	0.01794	0.0196018	0.295586	1.17788
protein_coding	F-box family protein	NA	F-box family protein; BEST Arabidopsis thaliana protein match is: F-box family protein (TAIR:AT2G36090.1); Has 105 Blast hits to 105 proteins in 13 species: Archae - 0; Bacteria - 0; Metazoa - 0; Fungi - 0; Plants - 105; Viruses - 0; Other Eukaryotes - 0 (source: NCBI BLink).	AT2G27310	0.603243	0.0796802	-0.536349	0.785866	1.5745	-0.208158	-0.378424	-0.363947	0.602161	0.885809	1.30735	1.41007	0.615503	0.424934		1	0.975584	0.778061	0.4373	0.00212768	1	0.921853	0.903601	0.554807	0.333074	0.0494148	0.0425148	0.491164	0.797187
protein_coding	Ggamma-subunit 1	heterotrimeric G protein gamma-subunit (AGG1) mRNA,	Ggamma-subunit 1 (GG1); FUNCTIONS IN: GTP binding; INVOLVED IN: defense response to fungus, incompatible interaction, acropetal auxin transport, seed germination, lateral root development; LOCATED IN: plasma membrane; EXPRESSED IN: 27 plant structures; EXPRESSED DURING: 13 growth stages; BEST Arabidopsis thaliana protein match is: G-protein gamma subunit 2 (TAIR:AT3G22942.1); Has 72 Blast hits to…	AT3G63420	0.432012	-0.580657	0.179942	0.90196	1.16562	-0.0405238	-0.938885	-0.181936	0.336831	0.238528	1.24894	1.29534	0.0572256	0.154178		1	0.414969	0.830292	0.0855048	9.64e-05	1	0.213971	0.678027	0.611089	0.786481	0.0371189	0.0525102	1.11521	1.17994
protein_coding	emp24/gp25L/p24 family/GOLD family protein	NA	emp24/gp25L/p24 family/GOLD family protein; FUNCTIONS IN: protein transmembrane transporter activity; INVOLVED IN: intracellular protein transport, transport; LOCATED IN: endomembrane system, integral to membrane, membrane; EXPRESSED IN: 23 plant structures; EXPRESSED DURING: 15 growth stages; CONTAINS InterPro DOMAIN/s: GOLD (InterPro:IPR009038), emp24/gp25L/p24 (InterPro:IPR000348); BEST Arabid…	AT1G21900	0.358875	-0.283941	0.0631648	0.922828	1.151	-0.251947	-0.448507	-0.15708	0.74091	0.621637	1.28982	1.61105	-0.108006	-0.34098		1	0.771013	0.868225	0.150632	0.0011621	1	0.775165	0.925327	0.0926405	0.33009	0.0292348	0.0260526	1.0778	1.12239
protein_coding	ENTH/ANTH/VHS superfamily protein	NA	ENTH/ANTH/VHS superfamily protein; FUNCTIONS IN: phospholipid binding, clathrin binding, binding, phosphatidylinositol binding; INVOLVED IN: clathrin coat assembly; LOCATED IN: plasma membrane; EXPRESSED IN: 24 plant structures; EXPRESSED DURING: 15 growth stages; CONTAINS InterPro DOMAIN/s: Epsin-like, N-terminal (InterPro:IPR013809), ANTH (InterPro:IPR011417), ENTH/VHS (InterPro:IPR008942), Cla…	AT5G35200	0.322574	-0.304605	0.00996513	0.77993	1.24629	-0.229251	-0.538572	-0.473619	0.321724	1.03497	1.18455	1.1292	-0.146835	-0.414207		1	0.779735	0.924946	0.299821	8.39e-05	1	0.685447	0.41744	0.78173	0.00673593	0.0413403	0.0801324	1.08335	1.09173
protein_coding	Protein kinase superfamily protein	NA	Protein kinase superfamily protein; FUNCTIONS IN: protein kinase activity, kinase activity, ATP binding; INVOLVED IN: protein amino acid phosphorylation; LOCATED IN: plasma membrane; EXPRESSED IN: 23 plant structures; EXPRESSED DURING: 13 growth stages; CONTAINS InterPro DOMAIN/s: Protein kinase, ATP binding site (InterPro:IPR017441), Protein kinase, catalytic domain (InterPro:IPR000719), Serine/…	AT3G09830	0.566771	-0.252792	0.118918	1.11146	0.994057	-0.751902	-0.971935	-0.951659	0.852496	0.642228	1.57202	1.84918	0.729327	-0.131868		1	0.857055	0.794448	0.172982	0.00507345	1	0.224007	0.281021	0.134407	0.374557	0.0144322	0.0157345	0.334555	0.957403
protein_coding	Phenazine biosynthesis PhzC/PhzF protein	NA	Phenazine biosynthesis PhzC/PhzF protein; FUNCTIONS IN: catalytic activity; INVOLVED IN: biosynthetic process; LOCATED IN: endomembrane system; EXPRESSED IN: 24 plant structures; EXPRESSED DURING: 15 growth stages; CONTAINS InterPro DOMAIN/s: Phenazine biosynthesis PhzC/PhzF protein (InterPro:IPR003719); BEST Arabidopsis thaliana protein match is: Phenazine biosynthesis PhzC/PhzF protein (TAIR:AT…	AT1G03210	0.203197	-0.273731	-0.0299117	1.17293	1.46574	0.401466	-0.864799	-0.729109	0.19289	0.726135	1.6221	1.56113	-0.0170789	-0.311384		1	0.906937	0.90155	0.245702	0.00677662	1	0.549964	0.369351	0.875032	0.487882	0.0110031	0.0287971	1.0194	1.12197
protein_coding	Phosphoglycerate mutase family protein	NA	Phosphoglycerate mutase family protein; CONTAINS InterPro DOMAIN/s: Histidine phosphatase superfamily, clade-1 (InterPro:IPR013078), PRIB5 (InterPro:IPR012398); BEST Arabidopsis thaliana protein match is: Phosphoglycerate mutase family protein (TAIR:AT3G60440.1); Has 301 Blast hits to 297 proteins in 123 species: Archae - 0; Bacteria - 109; Metazoa - 16; Fungi - 49; Plants - 68; Viruses - 0; Othe…	AT3G60450	-0.0287082	0.155497	0.310497	1.13113	1.20662	0.48392	-0.484741	-0.0304153	0.63836	0.712428	2.15801	2.40551	0.045927	-0.444476		1	0.761317	0.725039	0.0510175	0.000112318	1	0.802285	1	0.209909	0.193346	0.0028323	0.00458667	1.13541	1.15767
protein_coding	Protein of unknown function (DUF179)	NA	Protein of unknown function (DUF179); FUNCTIONS IN: molecular_function unknown; INVOLVED IN: biological_process unknown; LOCATED IN: chloroplast thylakoid lumen, chloroplast; EXPRESSED IN: 22 plant structures; EXPRESSED DURING: 13 growth stages; CONTAINS InterPro DOMAIN/s: Protein of unknown function DUF179 (InterPro:IPR003774); BEST Arabidopsis thaliana protein match is: Protein of unknown funct…	AT3G29240	0.150089	0.242749	0.736521	0.537027	0.762486	0.443936	0.0438069	0.118683	0.280106	0.711144	2.435	2.10998	-0.809213	-0.12922		1	0.638606	0.120768	0.225341	0.00403576	1	1	0.940579	0.401147	0.0163367	0.00130172	0.00817105	0.332841	0.983899
protein_coding	ADR1-like 2	NA	ADR1-like 2 (ADR1-L2); FUNCTIONS IN: nucleoside-triphosphatase activity, nucleotide binding, ATP binding; INVOLVED IN: apoptosis, defense response; EXPRESSED IN: 22 plant structures; EXPRESSED DURING: 13 growth stages; CONTAINS InterPro DOMAIN/s: ATPase, AAA+ type, core (InterPro:IPR003593), NB-ARC (InterPro:IPR002182), Powdery mildew resistance protein, RPW8 domain (InterPro:IPR008808), Disease …	AT5G04720	0.648186	0.79587	0.674003	0.827881	1.10929	0.283587	0.167276	-0.213209	0.568799	0.682244	1.91815	2.43327	-0.428351	-0.130226		1	0.142478	0.287171	0.193761	0.000235436	1	0.974673	0.670884	0.239451	0.215723	0.00510909	0.00428095	0.930467	1.00196
protein_coding	lysine histidine transporter 1	Encodes LHT1 (lysine histidine transporter), a high-affinity transporter for cellular amino acid uptake in both root epidermis and leaf mesophyll.	lysine histidine transporter 1; FUNCTIONS IN: amino acid transmembrane transporter activity; INVOLVED IN: amino acid transport, response to karrikin, amino acid import; LOCATED IN: plasma membrane, membrane; EXPRESSED IN: 22 plant structures; EXPRESSED DURING: 11 growth stages; CONTAINS InterPro DOMAIN/s: Amino acid transporter, transmembrane (InterPro:IPR013057); BEST Arabidopsis thaliana protei…	AT5G40780	0.827458	0.403908	0.445318	0.720657	0.939393	0.53095	-0.0867985	-0.172215	0.612758	0.945883	2.08906	2.41713	-1.09724	-0.60517		1	0.394538	0.545221	0.131526	0.00785332	1	0.989456	0.964386	0.0759712	0.0103804	0.00333908	0.00429907	0.120804	1.11179
protein_coding	Calcium-binding EF-hand family protein	NA	Calcium-binding EF-hand family protein; FUNCTIONS IN: calcium ion binding; LOCATED IN: cellular_component unknown; EXPRESSED IN: 24 plant structures; EXPRESSED DURING: 14 growth stages; CONTAINS InterPro DOMAIN/s: EF-Hand 1, calcium-binding site (InterPro:IPR018247), EF-HAND 2 (InterPro:IPR018249), EF-hand-like domain (InterPro:IPR011992); BEST Arabidopsis thaliana protein match is: pinoid-bindin…	AT2G46600	0.737965	0.331435	0.53943	0.344306	0.533492	0.512079	0.140302	0.464045	1.14409	0.782684	1.54329	2.27549	0.500408	0.0634957		1	0.547024	0.429932	0.634675	0.0869722	1	0.900188	0.410782	1.17e-05	0.0338793	0.0155485	0.00599228	0.711836	1.17167
protein_coding	multidrug resistance-associated protein 3	encodes an ATP-dependent MRP-like ABC transporter able to transport glutathione-conjugates as well as chlorophyll catabolites. The expression of this gene is upregulated by herbicide safeners such as benoxacor and fenclorim.	multidrug resistance-associated protein 3 (MRP3); FUNCTIONS IN: chlorophyll catabolite transmembrane transporter activity, ATPase activity, coupled to transmembrane movement of substances, glutathione S-conjugate-exporting ATPase activity; INVOLVED IN: transport, transmembrane transport; LOCATED IN: apoplast, vacuolar membrane, plasma membrane, plant-type vacuole; EXPRESSED IN: 6 plant structures…	AT3G13080	0.304532	0.335761	0.693036	0.455899	0.834435	-0.707762	-0.0982715	-0.0879154	0.723375	1.48506	1.38997	2.70739	-0.397666	-0.513485		1	0.778701	0.448275	0.576612	0.170732	1	1	0.86926	0.202338	0.00351617	0.0226875	0.00273494	0.866439	1.15955
protein_coding	Protein kinase superfamily protein	NA	Protein kinase superfamily protein; FUNCTIONS IN: protein serine/threonine/tyrosine kinase activity, kinase activity; INVOLVED IN: protein amino acid phosphorylation; EXPRESSED IN: 22 plant structures; EXPRESSED DURING: 13 growth stages; CONTAINS InterPro DOMAIN/s: Protein kinase, ATP binding site (InterPro:IPR017441), Serine/threonine-protein kinase domain (InterPro:IPR002290), Serine-threonine/…	AT5G01850	0.22737	0.758799	0.419731	1.11195	1.47817	0.0251476	0.716771	-0.632332	0.441749	0.343451	1.4356	1.41419	1.31181	0.735199		1	0.563804	0.599734	0.235259	0.000603415	1	0.833371	0.385633	0.629967	0.755062	0.020905	0.0424903	0.124863	0.765546
protein_coding	2-oxoglutarate (2OG) and Fe(II)-dependent oxygenase superfamily protein	NA	2-oxoglutarate (2OG) and Fe(II)-dependent oxygenase superfamily protein; FUNCTIONS IN: oxidoreductase activity, acting on paired donors, with incorporation or reduction of molecular oxygen, 2-oxoglutarate as one donor, and incorporation of one atom each of oxygen into both donors, oxidoreductase activity, oxidoreductase activity, acting on paired donors, with incorporation or reduction of molecul…	AT2G17720	-0.106579	0.761294	-0.0237028	0.640141	1.63531	-0.310666	0.840144	-0.275777	-0.0292578	0.31014	1.27635	1.59978	0.284818	-0.247927		1	0.272276	0.907966	0.635994	0.000493671	1	0.353029	0.928268	1	0.857884	0.0311289	0.0268588	1.12598	0.989285
protein_coding	Protein of unknown function (DUF726)	NA	Protein of unknown function (DUF726); FUNCTIONS IN: molecular_function unknown; INVOLVED IN: biological_process unknown; LOCATED IN: cellular_component unknown; EXPRESSED IN: 24 plant structures; EXPRESSED DURING: 15 growth stages; CONTAINS InterPro DOMAIN/s: Protein of unknown function DUF726 (InterPro:IPR007941); BEST Arabidopsis thaliana protein match is: Protein of unknown function (DUF726) (…	AT4G36210	-0.404829	0.551587	0.299793	0.708375	0.912408	-0.217964	0.308286	-0.351235	0.151956	0.704239	1.22553	1.2888	0.0211288	-0.308237		1	0.224835	0.690546	0.148802	0.00356399	1	0.848242	0.722748	0.695933	0.0144845	0.0351919	0.0521645	1.08027	1.01912
protein_coding	DNAJ homologue 2	Co-chaperonin similar to E. coli DnaJ	DNAJ homologue 2 (J2); FUNCTIONS IN: unfolded protein binding, heat shock protein binding, ATP binding; INVOLVED IN: protein folding, response to salt stress; LOCATED IN: plasma membrane; EXPRESSED IN: 24 plant structures; EXPRESSED DURING: 15 growth stages; CONTAINS InterPro DOMAIN/s: Molecular chaperone, heat shock protein, Hsp40, DnaJ (InterPro:IPR015609), HSP40/DnaJ peptide-binding (InterPro:…	AT5G22060	-0.470281	0.744369	0.391594	0.720356	1.03588	0.0294441	0.310326	0.00303479	0.353119	0.485753	1.5469	1.63696	0.160903	-0.0442806		1	0.109328	0.630649	0.199622	0.000712599	1	0.873791	1	0.398915	0.384369	0.0154611	0.0259391	1.19655	1.0167
protein_coding	ELMO/CED-12 family protein	NA	ELMO/CED-12 family protein; FUNCTIONS IN: molecular_function unknown; INVOLVED IN: phagocytosis; LOCATED IN: cytoskeleton; EXPRESSED IN: 24 plant structures; EXPRESSED DURING: 14 growth stages; CONTAINS InterPro DOMAIN/s: Engulfment/cell motility, ELMO (InterPro:IPR006816); BEST Arabidopsis thaliana protein match is: ELMO/CED-12 family protein (TAIR:AT2G44770.1); Has 836 Blast hits to 836 protein…	AT3G60260	-0.0497646	0.422564	0.0697366	1.01076	1.75411	-0.052475	0.11035	-0.281755	0.521658	0.856027	1.60249	2.07731	0.0474037	-0.181188		1	0.757396	0.992265	0.303321	0.000625621	1	1	0.632476	0.62741	0.465663	0.012	0.00862739	1.12669	1.00563
protein_coding	plant UBX domain-containing protein 2	encodes a peripheral membrane protein that contains UBX domain and interacts with AtCDC48 in vitro and co-fractionates with membrane-associated but not soluble AtCDC48 in vivo.	plant UBX domain-containing protein 2 (PUX2); CONTAINS InterPro DOMAIN/s: PUB domain (InterPro:IPR018997), UBX (InterPro:IPR001012), PUG domain (InterPro:IPR006567); BEST Arabidopsis thaliana protein match is: ubiquitin-associated (UBA)/TS-N domain-containing protein (TAIR:AT1G04850.1); Has 563 Blast hits to 563 proteins in 115 species: Archae - 0; Bacteria - 15; Metazoa - 269; Fungi - 22; Plants…	AT2G01650	0.073562	0.227432	-0.101439	0.740659	1.21843	-0.52287	-0.124065	-0.479161	0.114827	0.0737996	1.36813	1.66425	-0.0892544	-0.165915		1	0.884827	1	0.291055	0.00427181	1	0.995075	0.564339	0.885809	1	0.026161	0.0241075	1.08862	0.960781
protein_coding	heat shock protein 70 (Hsp 70) family protein	NA	heat shock protein 70 (Hsp 70) family protein; FUNCTIONS IN: ATP binding; LOCATED IN: plasma membrane, chloroplast; EXPRESSED IN: 24 plant structures; EXPRESSED DURING: 13 growth stages; CONTAINS InterPro DOMAIN/s: Heat shock protein 70, conserved site (InterPro:IPR018181), Heat shock protein Hsp70 (InterPro:IPR001023), Heat shock protein 70 (InterPro:IPR013126); BEST Arabidopsis thaliana protein…	AT4G16660	-0.688033	0.866695	0.134493	1.00772	0.993562	-0.619362	0.541878	0.103541	0.447077	-0.065193	1.74747	2.00706	0.33281	-0.359815		1	0.0439941	0.86547	0.10314	0.000779271	1	0.615955	0.923257	0.357931	1	0.00822388	0.0102971	1.0628	1.15482
protein_coding	Protein of unknown function (DUF819)	NA	Protein of unknown function (DUF819); LOCATED IN: chloroplast envelope; EXPRESSED IN: 22 plant structures; EXPRESSED DURING: 13 growth stages; CONTAINS InterPro DOMAIN/s: Protein of unknown function DUF819 (InterPro:IPR008537); BEST Arabidopsis thaliana protein match is: Protein of unknown function (DUF819) (TAIR:AT5G24000.1); Has 1807 Blast hits to 1807 proteins in 277 species: Archae - 0; Bacte…	AT5G52540	0.494766	0.916207	0.292627	0.898442	0.770487	-0.229996	0.184649	-0.450877	-0.152657	-0.322084	1.80098	1.8234	-0.225955	0.0265539		1	0.00765801	0.746528	0.0439871	0.0231448	1	0.988863	0.487334	0.786477	0.533736	0.007264	0.0158069	1.1002	1.13859
protein_coding	Protein of unknown function (DUF707)	NA	Protein of unknown function (DUF707); CONTAINS InterPro DOMAIN/s: Protein of unknown function DUF707 (InterPro:IPR007877); BEST Arabidopsis thaliana protein match is: Protein of unknown function (DUF707) (TAIR:AT1G13000.2); Has 35333 Blast hits to 34131 proteins in 2444 species: Archae - 798; Bacteria - 22429; Metazoa - 974; Fungi - 991; Plants - 531; Viruses - 0; Other Eukaryotes - 9610 (source:…	AT1G67850	-0.459257	-0.266967	0.333438	1.31551	1.77245	-0.783635	0.0301422	-0.697159	0.606917	0.702044	1.83305	2.39668	0.0176599	-0.0480397		1	0.909916	0.672656	0.0215759	1.93e-05	1	1	0.547626	0.279442	0.298909	0.00688462	0.00448198	1.07563	0.958803
protein_coding	DNAJ heat shock family protein	J domain protein localized in ER lumen. Can partially compensate for the growth defect in jem1 scj1 mutant yeast. Forms a complex SDF2-ERdj3B-BiP that is required for the proper accumulation of the surface-exposed leucine-rich repeat receptor kinases EFR. EFR is involved in PAMP (pathogen associated molecular patterns) triggered immunity.	ATERDJ3B; FUNCTIONS IN: unfolded protein binding, heat shock protein binding; INVOLVED IN: protein folding, PAMP-induced immunity; LOCATED IN: plasma membrane, endoplasmic reticulum lumen; EXPRESSED IN: 23 plant structures; EXPRESSED DURING: 15 growth stages; CONTAINS InterPro DOMAIN/s: Molecular chaperone, heat shock protein, Hsp40, DnaJ (InterPro:IPR015609), HSP40/DnaJ peptide-binding (InterPro…	AT3G62600	-0.985297	-0.176418	0.584133	1.72462	1.38429	-1.219	-0.417786	0.102878	1.36255	0.562722	2.34989	2.6375	0.440789	-0.194366		1	0.92636	0.337549	0.00170528	2.05e-08	1	0.841214	0.959387	0.000358145	0.2869	0.00175194	0.00305172	0.778326	1.166
protein_coding	stromal cell-derived factor 2-like protein precursor	Encodes an endoplasmic reticulum protein SDF2 (stromal-derived factor-2). Forms a complex SDF2-ERdj3B-BiP that is required for the proper accumulation of the surface-exposed leucine-rich repeat receptor kinases EFR. EFR is involved in PAMP (pathogen associated molecular patterns) triggered immunity.	stromal cell-derived factor 2-like protein precursor (SDF2); FUNCTIONS IN: molecular_function unknown; INVOLVED IN: defense response to bacterium, defense response to fungus, PAMP-induced immunity; LOCATED IN: endoplasmic reticulum, membrane; EXPRESSED IN: 25 plant structures; EXPRESSED DURING: 14 growth stages; CONTAINS InterPro DOMAIN/s: MIR (InterPro:IPR003608), MIR motif (InterPro:IPR016093);…	AT2G25110	-0.419504	-0.0701103	0.794448	1.5015	1.90425	-0.17019	-0.456594	0.265315	0.99281	1.04849	1.89172	2.08804	0.206505	-0.234584		1	0.977856	0.154218	0.000788197	4.33e-12	1	0.745192	0.732166	0.00977437	0.000545435	0.00588106	0.00888328	1.20724	1.16434
protein_coding	calreticulin 1b	Encodes one of three Arabidopsis calreticulins.	calreticulin 1b (CRT1b); FUNCTIONS IN: unfolded protein binding, calcium ion binding; INVOLVED IN: response to oxidative stress, response to salt stress; LOCATED IN: mitochondrion, endoplasmic reticulum, vacuole; EXPRESSED IN: 26 plant structures; EXPRESSED DURING: 14 growth stages; CONTAINS InterPro DOMAIN/s: Calreticulin/calnexin, P (InterPro:IPR009033), Calreticulin/calnexin (InterPro:IPR00158…	AT1G09210	-0.335559	0.430296	0.555541	1.49569	1.47168	-0.357015	-0.243246	0.195807	1.21153	0.918664	1.9094	2.05901	0.177491	-0.0892241		1	0.455513	0.361239	0.0003381	2.5e-15	1	0.911647	0.878231	4.95e-06	0.000353508	0.00551556	0.00926462	1.19729	1.11241
protein_coding	calnexin 1	NA	calnexin 1 (CNX1); FUNCTIONS IN: unfolded protein binding, calcium ion binding; INVOLVED IN: protein folding; LOCATED IN: in 8 components; EXPRESSED IN: 26 plant structures; EXPRESSED DURING: 15 growth stages; CONTAINS InterPro DOMAIN/s: Calreticulin/calnexin, P (InterPro:IPR009033), Calreticulin/calnexin (InterPro:IPR001580), Calreticulin/calnexin, conserved site (InterPro:IPR018124), Concanaval…	AT5G61790	-0.646188	0.558142	0.929705	1.57218	1.38237	-0.299975	-0.00395916	0.491534	1.05773	0.671654	2.05548	2.34545	0.166136	-0.157451		1	0.261426	0.0459543	0.000135708	3.4e-16	1	1	0.656809	0.000263169	0.0277998	0.00383871	0.00541079	1.19354	1.16067
protein_coding	Chaperone protein htpG family protein	encodes an ortholog of GRP94, an ER-resident HSP90-like protein and is involved in regulation of meristem size and organization. Single and double mutant analyses suggest that SHD may be required for the correct folding and/or complex formation of CLV proteins. Lines carrying recessive mutations in this locus exhibits expanded shoot meristems, disorganized root meristems, and defective pollen tub…	SHEPHERD (SHD); FUNCTIONS IN: unfolded protein binding, ATP binding; INVOLVED IN: in 8 processes; LOCATED IN: in 6 components; EXPRESSED IN: 25 plant structures; EXPRESSED DURING: 16 growth stages; CONTAINS InterPro DOMAIN/s: Chaperone protein htpG (InterPro:IPR001404), Heat shock protein Hsp90, C-terminal (InterPro:IPR020576), Heat shock protein Hsp90, N-terminal (InterPro:IPR020575), Molecular …	AT4G24190	-0.307748	0.0966599	0.998619	1.29612	1.361	-0.730938	-0.0686207	0.785879	0.891894	0.502225	1.64016	1.94365	-0.097479	-0.121279		1	0.819712	0.0377456	0.00241218	2.3e-09	1	1	0.202994	0.00361934	0.0931784	0.0110125	0.0117535	1.05695	1.11081
protein_coding	ABC1 family protein	NA	ABC1 family protein; CONTAINS InterPro DOMAIN/s: ABC-1 (InterPro:IPR004147), Beta-lactamase-type transpeptidase fold (InterPro:IPR012338), Beta-lactamase-related (InterPro:IPR001466), Protein kinase-like domain (InterPro:IPR011009); BEST Arabidopsis thaliana protein match is: ABC2 homolog 13 (TAIR:AT5G64940.2).	AT5G24810	-0.839071	0.382086	0.557832	2.17775	1.85241	-0.611532	0.252763	-0.326944	1.30187	1.02371	1.09107	1.54476	0.53741	-0.0746243		1	0.679455	0.548637	6.2e-05	2.25e-06	1	0.931104	0.880801	0.0337632	0.0613322	0.0530642	0.0292254	0.6684	1.00211
protein_coding	Calreticulin family protein	NA	Calreticulin family protein; FUNCTIONS IN: unfolded protein binding, calcium ion binding; INVOLVED IN: protein folding; LOCATED IN: endoplasmic reticulum; EXPRESSED IN: 22 plant structures; EXPRESSED DURING: 13 growth stages; CONTAINS InterPro DOMAIN/s: Calreticulin/calnexin, P (InterPro:IPR009033), Calreticulin/calnexin (InterPro:IPR001580), Calreticulin/calnexin, conserved site (InterPro:IPR018…	AT5G07340	-1.49572	0.306727	0.404968	1.58858	1.05823	-0.477153	0.0218226	0.157862	1.18237	0.648336	1.41766	1.80294	0.184623	-0.40709		1	0.646029	0.555791	0.00313025	0.000736369	1	1	0.682867	0.00777221	0.0944333	0.0189951	0.0161356	1.20149	1.15913
protein_coding	beta glucosidase 10	NA	beta glucosidase 10 (BGLU10); FUNCTIONS IN: cation binding, hydrolase activity, hydrolyzing O-glycosyl compounds, catalytic activity; INVOLVED IN: carbohydrate metabolic process; LOCATED IN: vacuole; EXPRESSED IN: 22 plant structures; EXPRESSED DURING: 13 growth stages; CONTAINS InterPro DOMAIN/s: Glycoside hydrolase, family 1 (InterPro:IPR001360), Glycoside hydrolase, family 1, active site (Inte…	AT4G27830	-1.13811	-0.309856	0.0923267	0.739003	0.936996	-0.977935	-0.161283	-0.261839	1.20837	1.23828	1.38061	1.60145	0.759685	-0.242226		1	0.844664	0.908743	0.304127	0.00870379	1	0.974673	0.931566	0.00882777	0.000357864	0.0245441	0.0274248	0.473253	0.98991
protein_coding	Protein phosphatase 2C family protein	NA	Protein phosphatase 2C family protein; FUNCTIONS IN: protein serine/threonine phosphatase activity, catalytic activity; LOCATED IN: cellular_component unknown; EXPRESSED IN: 22 plant structures; EXPRESSED DURING: 13 growth stages; CONTAINS InterPro DOMAIN/s: Protein phosphatase 2C-related (InterPro:IPR001932), Protein phosphatase 2C (InterPro:IPR015655), Protein phosphatase 2C, N-terminal (InterP…	AT4G28400	-0.825481	-0.157552	0.284412	0.755069	1.25352	-0.793732	0.130395	-0.394428	1.16181	1.41786	1.00914	1.42628	-0.264902	0.111416		1	0.997311	0.730146	0.286558	0.000431644	1	1	0.564847	0.0245265	0.000253968	0.0800963	0.039325	1.08447	1.21675
protein_coding	Protein phosphatase 2C family protein	NA	Protein phosphatase 2C family protein; FUNCTIONS IN: protein serine/threonine phosphatase activity, catalytic activity; INVOLVED IN: protein amino acid dephosphorylation; LOCATED IN: plasma membrane; EXPRESSED IN: 24 plant structures; EXPRESSED DURING: 15 growth stages; CONTAINS InterPro DOMAIN/s: Protein phosphatase 2C, manganese/magnesium aspartate binding site (InterPro:IPR000222), Protein pho…	AT4G31860	-0.729742	-0.18943	-0.00456311	0.715206	1.03986	-0.71748	0.104818	-0.500026	0.904392	1.03972	1.21203	0.994922	-0.110856	0.278429		1	0.877282	0.985508	0.289055	0.00465544	1	1	0.493585	0.0548537	0.00837015	0.0406731	0.122747	1.06979	1.21581
protein_coding	glucose-6-phosphate dehydrogenase 6	Encodes a cytosolic glucose-6-phosphate dehydrogenase that is insensitive to reduction by DTT and whose mRNA is expressed ubiquitously.	glucose-6-phosphate dehydrogenase 6 (G6PD6); CONTAINS InterPro DOMAIN/s: Glucose-6-phosphate dehydrogenase, C-terminal (InterPro:IPR022675), Glucose-6-phosphate dehydrogenase, active site (InterPro:IPR019796), NAD(P)-binding domain (InterPro:IPR016040), Glucose-6-phosphate dehydrogenase (InterPro:IPR001282), Glucose-6-phosphate dehydrogenase, NAD-binding (InterPro:IPR022674); BEST Arabidopsis tha…	AT5G40760	-0.157256	-0.523209	0.544248	0.706242	0.883972	-0.311677	-0.532096	-0.0778623	1.05369	1.6868	1.44768	1.37847	0.238641	-0.1876		1	0.611515	0.454716	0.469159	0.116364	1	0.805909	1	0.0922963	8.47e-05	0.0193942	0.0440412	1.18935	1.00835
protein_coding	Calcium-binding EF-hand family protein	NA	Calcium-binding EF-hand family protein; FUNCTIONS IN: calcium ion binding; INVOLVED IN: biological_process unknown; LOCATED IN: plasma membrane, vacuole; EXPRESSED IN: 25 plant structures; EXPRESSED DURING: 13 growth stages; CONTAINS InterPro DOMAIN/s: EF-Hand 1, calcium-binding site (InterPro:IPR018247), EF-HAND 2 (InterPro:IPR018249), EF-hand-like domain (InterPro:IPR011992), Calcium-binding EF…	AT1G18210	-0.172358	0.161075	0.665933	0.856845	0.901272	0.387271	0.0644773	0.521577	1.38306	1.04126	1.22217	1.23978	0.0962682	0.0509447		1	0.836863	0.215373	0.0795072	9.39e-06	1	1	0.40291	3.85e-07	7.68e-06	0.0382665	0.0597834	1.18048	1.19913
protein_coding	rotamase CYP 7	Encodes cyclophilin ROC7.	rotamase CYP 7 (ROC7); FUNCTIONS IN: peptidyl-prolyl cis-trans isomerase activity; INVOLVED IN: protein folding, root development; LOCATED IN: chloroplast; EXPRESSED IN: 22 plant structures; EXPRESSED DURING: 13 growth stages; CONTAINS InterPro DOMAIN/s: Cyclophilin-like (InterPro:IPR015891), Peptidyl-prolyl cis-trans isomerase, cyclophilin-type (InterPro:IPR002130), Peptidyl-prolyl cis-trans iso…	AT5G58710	0.0547793	-0.127214	0.718491	1.16771	1.04314	0.0587546	-0.130252	0.353547	0.861647	0.418504	0.845971	1.39083	-0.172985	-0.125866		1	0.964952	0.173074	0.0052491	5.55e-05	1	0.996024	0.604662	0.0147031	0.288535	0.129527	0.0424822	1.09965	1.0043
protein_coding	calcium-dependent protein kinase 28	member of Calcium Dependent Protein Kinase	calcium-dependent protein kinase 28 (CPK28); FUNCTIONS IN: protein serine/threonine kinase activity, calmodulin-dependent protein kinase activity, protein kinase activity, calcium ion binding, ATP binding; INVOLVED IN: protein amino acid phosphorylation; LOCATED IN: plasma membrane; EXPRESSED IN: 23 plant structures; EXPRESSED DURING: 13 growth stages; CONTAINS InterPro DOMAIN/s: Protein kinase, …	AT5G66210	-0.244229	-0.155276	1.02945	1.77922	1.13696	-0.429118	-0.198573	-0.0333486	1.24451	0.186024	1.19519	1.79177	0.439579	0.200178		1	1	0.0910276	0.0127161	0.000894993	1	1	1	0.14701	0.794789	0.0401743	0.0164028	0.887046	1.21533
protein_coding	glutathione S-transferase zeta 1	Encodes glutathione transferase belonging to the zeta class of GSTs. Naming convention according to Wagner et al. (2002). The protein undergoes spontaneous thiolation following treatment with the oxidant tert-butylhydroperoxide.	glutathione S-transferase zeta 1 (GSTZ1); FUNCTIONS IN: glutathione transferase activity, catalytic activity; INVOLVED IN: toxin catabolic process; LOCATED IN: cytoplasm; EXPRESSED IN: 23 plant structures; EXPRESSED DURING: 13 growth stages; CONTAINS InterPro DOMAIN/s: Thioredoxin fold (InterPro:IPR012335), Maleylacetoacetate isomerase (InterPro:IPR005955), Glutathione S-transferase, C-terminal (…	AT2G02390	-0.205491	-0.927	0.374592	1.33551	0.922614	-0.930335	-0.927215	-0.20984	1.38447	0.957104	1.30528	1.24641	0.145411	-0.238668		1	0.0258077	0.535206	0.00619301	0.00524318	1	0.125799	0.801776	0.000203781	0.0371655	0.0291711	0.0589383	1.19897	1.01152
protein_coding	Galactosyltransferase family protein	NA	Galactosyltransferase family protein; FUNCTIONS IN: transferase activity, transferring glycosyl groups, beta-1,3-galactosyltransferase activity; INVOLVED IN: protein amino acid glycosylation; LOCATED IN: Golgi apparatus; EXPRESSED IN: 20 plant structures; EXPRESSED DURING: 13 growth stages; CONTAINS InterPro DOMAIN/s: Glycosyl transferase, family 31 (InterPro:IPR002659); BEST Arabidopsis thaliana…	AT1G77810	-1.47587	-0.759955	0.205555	1.10276	1.63328	-1.43377	-0.493236	-0.0273531	1.13935	1.71087	0.739012	1.57085	-0.102994	-0.217657		1	0.416266	0.801121	0.172316	0.00118551	1	0.913913	0.797745	0.0864255	0.000872249	0.195882	0.0283638	1.06197	0.972788
protein_coding	Esterase/lipase/thioesterase family protein	NA	Esterase/lipase/thioesterase family protein; FUNCTIONS IN: transferase activity, transferring acyl groups other than amino-acyl groups, catalytic activity, acyltransferase activity; INVOLVED IN: metabolic process; LOCATED IN: plastoglobule; CONTAINS InterPro DOMAIN/s: Diacylglycerol acyltransferase (InterPro:IPR007130), Phospholipid/glycerol acyltransferase (InterPro:IPR002123); BEST Arabidopsis …	AT3G26840	-0.904622	-0.140953	0.938457	0.542153	2.34999	-1.10226	-0.199971	-0.336421	1.05934	2.44348	1.24024	2.03716	0.909389	0.467923		1	1	0.164207	0.700036	2.45e-06	1	1	0.635233	0.0807217	7.66e-06	0.0619003	0.00977381	0.253405	1.0297
protein_coding	translocon at the outer membrane of chloroplasts 64-V	NA	translocon at the outer membrane of chloroplasts 64-V (TOC64-V); FUNCTIONS IN: amidase activity, binding, carbon-nitrogen ligase activity, with glutamine as amido-N-donor; INVOLVED IN: protein targeting to mitochondrion; LOCATED IN: mitochondrion; EXPRESSED IN: 25 plant structures; EXPRESSED DURING: 13 growth stages; CONTAINS InterPro DOMAIN/s: Tetratricopeptide-like helical (InterPro:IPR011990),…	AT5G09420	NE	0.0541936	1.02897	2.2331	2.22218	0.871104	-0.514992	-0.330844	0.131431	0.704829	1.26395	1.36853	0.134885	-0.303995		NA	1	0.128626	0.00736134	0.000991801	1	0.884587	0.997627	1	0.554328	0.0318944	0.0438977	1.19406	1.14615
protein_coding	Calcium-dependent phosphotriesterase superfamily protein	NA	Calcium-dependent phosphotriesterase superfamily protein; FUNCTIONS IN: strictosidine synthase activity; INVOLVED IN: alkaloid biosynthetic process, biosynthetic process; LOCATED IN: endomembrane system; EXPRESSED IN: 22 plant structures; EXPRESSED DURING: 13 growth stages; CONTAINS InterPro DOMAIN/s: Strictosidine synthase (InterPro:IPR004141), Strictosidine synthase, conserved region (InterPro:…	AT3G51450	0.0799268	0.384835	0.438774	2.15468	2.34273	-0.286583	-0.48865	-0.390351	0.233336	-0.0699646	1.43169	1.24548	4.48634	1.53779		1	0.467994	0.567446	1.22e-06	7.64e-18	1	0.803416	0.847626	0.610261	1	0.0371978	0.098206	0.00491304	0.0188718
protein_coding	Translation elongation factor EFG/EF2 protein	NA	Translation elongation factor EFG/EF2 protein; FUNCTIONS IN: translation factor activity, nucleic acid binding, translation elongation factor activity, ATP binding; INVOLVED IN: translational elongation; LOCATED IN: mitochondrion; CONTAINS InterPro DOMAIN/s: Protein synthesis factor, GTP-binding (InterPro:IPR000795), Translation elongation factor EFG/EF2, domain IV (InterPro:IPR005517), Small GTP…	AT1G45332	-0.715094	-0.366469	0.419506	2.29217	1.72078	-0.475838	-0.272405	-0.196463	0.904744	0.890803	1.14463	1.12788	0.129948	-0.331127		1	0.594282	0.582768	0.000430756	0.000896423	1	0.901139	1	0.278289	0.28453	0.0476834	0.0827247	1.19328	1.06364
protein_coding	nitrate reductase 1	Encodes the cytosolic minor isoform of nitrate reductase (NR). Involved in the first step of nitrate assimilation, it contributes about 15% of the nitrate reductase activity in shoots. Similar to molybdopterin oxidoreductases at the N-terminus, and to FAD/NAD-binding cytochrome reductases at the C-terminus. Cofactors: FAD, heme iron (cytochrome B-557), and molybdenum-pterin.	nitrate reductase 1 (NIA1); FUNCTIONS IN: nitrate reductase activity, protein binding; INVOLVED IN: nitric oxide biosynthetic process, nitrate assimilation, response to light stimulus; LOCATED IN: cytosol; EXPRESSED IN: 24 plant structures; EXPRESSED DURING: 13 growth stages; CONTAINS InterPro DOMAIN/s: Cytochrome b5, heme-binding site (InterPro:IPR018506), Nitrate reductase NADH dependent (Inter…	AT1G77760	-0.758839	-0.391127	0.507689	1.4585	2.1868	-0.766868	-0.620048	-0.0989546	0.204479	0.336879	1.55985	1.20122	0.607532	-0.0416513		1	0.575092	0.381568	0.00704366	4.85e-10	1	0.632055	0.962393	0.753654	0.676805	0.0129941	0.0703919	0.722394	1.16804
protein_coding	NA	NA	unknown protein; BEST Arabidopsis thaliana protein match is: unknown protein (TAIR:AT5G66480.1); Has 76 Blast hits to 75 proteins in 28 species: Archae - 0; Bacteria - 10; Metazoa - 7; Fungi - 2; Plants - 49; Viruses - 0; Other Eukaryotes - 8 (source: NCBI BLink).	AT3G50910	-1.06631	-0.211141	0.745448	1.03653	1.37035	-0.687705	-0.561107	0.0985761	0.861807	0.61049	1.1198	1.40251	0.493452	0.404129		1	0.868237	0.27696	0.233718	8.47e-05	1	0.747074	0.894104	0.146201	0.367842	0.0720558	0.0452623	0.935214	0.992064
protein_coding	thioredoxin family protein	Encodes a protein disulfide isomerase-like (PDIL) protein, a member of a multigene family within the thioredoxin (TRX) superfamily. Transcript levels for this gene are up-regulated in response to three different chemical inducers of ER stress (dithiothreitol, beta-mercaptoethanol, and tunicamycin). AtIRE1-2 does not appear to be required for this response, but the atbzip60 mutant has a diminished…	UNFERTILIZED EMBRYO SAC 5 (UNE5); FUNCTIONS IN: protein disulfide isomerase activity; INVOLVED IN: response to endoplasmic reticulum stress, double fertilization forming a zygote and endosperm, embryo sac development, pollen tube development, embryo development ending in seed dormancy; LOCATED IN: endoplasmic reticulum, plasma membrane, plant-type cell wall; EXPRESSED IN: 25 plant structures; EXP…	AT2G47470	-0.72103	-0.296278	0.836643	1.10541	1.59072	-0.736292	-0.611687	0.365117	0.657755	0.867703	1.52999	1.61985	-0.0576124	-0.00571664		1	0.765127	0.112662	0.0233487	3.25e-14	1	0.598282	0.683506	0.0709948	0.00033605	0.0152396	0.0259804	1.05682	1.0581
protein_coding	RNA-binding (RRM/RBD/RNP motifs) family protein	NA	RNA-binding (RRM/RBD/RNP motifs) family protein; FUNCTIONS IN: oxidoreductase activity, nucleotide binding, nucleic acid binding; INVOLVED IN: oxidation reduction; EXPRESSED IN: 24 plant structures; EXPRESSED DURING: 15 growth stages; CONTAINS InterPro DOMAIN/s: Aldo/keto reductase (InterPro:IPR001395), RNA recognition motif, RNP-1 (InterPro:IPR000504), Nucleotide-binding, alpha-beta plait (Inter…	AT4G17720	-0.458848	-0.331291	0.519313	1.20021	1.67225	-0.976291	-0.408945	-0.162637	0.495235	0.564306	1.5626	1.87595	0.430063	-0.187245		1	0.703035	0.528013	0.040328	1.2e-07	1	0.832455	0.807614	0.431548	0.398446	0.0133563	0.0136982	0.799289	0.962959
protein_coding	Beta-glucosidase, GBA2 type family protein	NA	Beta-glucosidase, GBA2 type family protein; FUNCTIONS IN: glucosylceramidase activity, catalytic activity; INVOLVED IN: glucosylceramide catabolic process, sphingolipid metabolic process; LOCATED IN: plasma membrane; EXPRESSED IN: 25 plant structures; EXPRESSED DURING: 15 growth stages; CONTAINS InterPro DOMAIN/s: Glucosylceramidase (InterPro:IPR006775), Six-hairpin glycosidase-like (InterPro:IPR…	AT3G24180	-0.786793	-0.401584	-0.163355	0.616389	1.32197	-0.785898	-0.575293	-0.674974	0.0366401	0.623342	1.19229	1.07748	0.237833	-0.323872		1	0.614415	0.948343	0.315853	0.000110445	1	0.767369	0.370749	0.870348	0.386633	0.0385793	0.0919454	1.18584	1.01624
protein_coding	elongation factor family protein	NA	elongation factor family protein; FUNCTIONS IN: GTP binding, translation elongation factor activity, GTPase activity; LOCATED IN: intracellular; EXPRESSED IN: 20 plant structures; EXPRESSED DURING: 13 growth stages; CONTAINS InterPro DOMAIN/s: GTP-binding protein TypA (InterPro:IPR006298), Protein synthesis factor, GTP-binding (InterPro:IPR000795), Small GTP-binding protein (InterPro:IPR005225), …	AT2G31060	-0.650689	-0.22109	0.083601	1.25475	1.63655	-0.619075	-0.648324	-0.447347	-0.112925	0.334001	1.45126	1.33064	0.25204	-0.476448		1	0.702072	0.848335	0.0192079	1.47e-07	1	0.530395	0.772931	0.972386	0.583076	0.0187007	0.0485384	1.17483	1.13575
protein_coding	Translation elongation factor EFG/EF2 protein	NA	Translation elongation factor EFG/EF2 protein; FUNCTIONS IN: translation factor activity, nucleic acid binding, GTP binding, translation elongation factor activity, GTPase activity; INVOLVED IN: response to cadmium ion; LOCATED IN: mitochondrion; EXPRESSED IN: cultured cell; CONTAINS InterPro DOMAIN/s: Protein synthesis factor, GTP-binding (InterPro:IPR000795), Translation elongation factor EFG/E…	AT2G45030	-0.933112	0.0784217	0.394484	1.23112	1.2651	-1.08885	-0.26611	-0.0972811	0.0909664	0.560957	1.14463	1.12788	0.129948	-0.331127		1	0.945646	0.568876	0.0336172	0.000514218	1	0.941739	0.955459	0.786288	0.286988	0.0476834	0.0827247	1.19328	1.06364
protein_coding	Protein kinase superfamily protein	NA	Protein kinase superfamily protein; FUNCTIONS IN: protein serine/threonine kinase activity, protein kinase activity, kinase activity, ATP binding; INVOLVED IN: protein amino acid phosphorylation; LOCATED IN: endomembrane system; EXPRESSED IN: 23 plant structures; EXPRESSED DURING: 13 growth stages; CONTAINS InterPro DOMAIN/s: Protein kinase, catalytic domain (InterPro:IPR000719), Serine/threonine…	AT5G15730	-0.684496	0.0717399	0.402668	0.425542	1.69987	-0.64868	-0.17842	-0.14508	0.275541	0.698403	1.04387	1.42188	-0.0139471	-0.180218		1	1	0.630935	0.793957	0.00185524	1	0.963287	1	0.852926	0.561077	0.0665504	0.0392053	1.04544	0.991076
protein_coding	P-loop containing nucleoside triphosphate hydrolases superfamily protein	Encodes QQT2. Required for early embryo development. qqt1 mutant lines are embryo-defective. Participates in the organization of microtubules during cell division. Interacts with QQT1 (encoded by AT5G22370).	quatre-quart2 (QQT2); FUNCTIONS IN: nucleotide binding, ATP binding; INVOLVED IN: embryo development, cell division; LOCATED IN: microtubule; EXPRESSED IN: 22 plant structures; EXPRESSED DURING: 13 growth stages; CONTAINS InterPro DOMAIN/s: Protein of unknown function, ATP binding (InterPro:IPR004130); BEST Arabidopsis thaliana protein match is: P-loop containing nucleoside triphosphate hydrolase…	AT4G21800	-1.49209	-0.229011	0.475153	0.812125	1.45199	-1.15707	-0.303214	0.24959	-0.0964872	0.128641	1.035	1.39717	0.198229	-0.542463		1	0.86171	0.459062	0.203024	3.69e-07	1	0.930156	0.808261	1	0.905782	0.067452	0.0421811	1.20805	1.13671
protein_coding	UDP-glucosyltransferase 73B2	The At4g34135 gene encodes a flavonol 7-O-glucosyltransferase (EC 2.4.1.237) that glucosylates also with a 20 fold lower activity flavonols (kaempferol and quercetin) at the 3-O-position.	UDP-glucosyltransferase 73B2 (UGT73B2); FUNCTIONS IN: flavonol 3-O-glucosyltransferase activity, UDP-glycosyltransferase activity, quercetin 7-O-glucosyltransferase activity, UDP-glucosyltransferase activity; INVOLVED IN: flavonol biosynthetic process, response to other organism; LOCATED IN: endomembrane system; EXPRESSED IN: male gametophyte, pollen tube; EXPRESSED DURING: M germinated pollen st…	AT4G34135	-0.916503	0.0284043	1.58398	2.12542	1.84761	-1.08567	-0.321628	0.482715	0.785067	0.350051	1.15037	1.6848	0.579087	0.408493		1	1	0.104567	0.0623283	0.000283479	1	1	0.904992	0.685871	0.95151	0.0667024	0.0233134	0.574762	1.1504
protein_coding	P-loop containing nucleoside triphosphate hydrolases superfamily protein	NA	P-loop containing nucleoside triphosphate hydrolases superfamily protein; FUNCTIONS IN: nucleoside-triphosphatase activity, ATPase activity, nucleotide binding, ATP binding; LOCATED IN: endomembrane system; EXPRESSED IN: 23 plant structures; EXPRESSED DURING: 13 growth stages; CONTAINS InterPro DOMAIN/s: ATPase, AAA-type, core (InterPro:IPR003959), ATPase, AAA+ type, core (InterPro:IPR003593); BE…	AT1G43910	-0.861101	0.144223	1.76411	2.66734	2.3238	-1.14831	-0.122099	0.0840864	0.469243	0.303204	0.927846	2.58638	0.211971	-0.368197		1	0.967972	0.0237229	0.00745109	1.37e-05	1	1	0.819168	0.936834	0.986663	0.103266	0.00327513	1.18486	1.15808
protein_coding	P-loop containing nucleoside triphosphate hydrolases superfamily protein	NA	P-loop containing nucleoside triphosphate hydrolases superfamily protein; FUNCTIONS IN: ATP binding; LOCATED IN: plasma membrane; EXPRESSED IN: 23 plant structures; EXPRESSED DURING: 13 growth stages; CONTAINS InterPro DOMAIN/s: ATPase, AAA-type, core (InterPro:IPR003959); BEST Arabidopsis thaliana protein match is: P-loop containing nucleoside triphosphate hydrolases superfamily protein (TAIR:AT…	AT5G17760	-0.0040627	0.323355	1.32381	1.48754	1.53277	-0.212326	-0.368664	0.542478	0.304877	-0.247022	1.0187	2.1026	-0.223874	-0.252463		1	0.854681	0.106046	0.0332543	5.93e-05	1	0.938978	0.442251	0.684417	1	0.0803057	0.00866667	1.08612	1.10011
protein_coding	Receptor-like protein kinase-related family protein	Encodes a plasmodesmal protein that may be involved in the intercellular movement of molecules through the plasmodesmata. The protein has two DUF26 domains and a single transmembrane domain.	HOPW1-1-INDUCED GENE1 (HWI1); CONTAINS InterPro DOMAIN/s: Protein of unknown function DUF26 (InterPro:IPR002902); BEST Arabidopsis thaliana protein match is: plasmodesmata-located protein 6 (TAIR:AT2G01660.1); Has 1576 Blast hits to 1438 proteins in 26 species: Archae - 0; Bacteria - 0; Metazoa - 0; Fungi - 0; Plants - 1576; Viruses - 0; Other Eukaryotes - 0 (source: NCBI BLink).	AT1G70690	0.326289	0.336598	1.4248	2.89853	2.07872	1.17856	-0.0601248	0.226768	1.46765	0.532816	1.50527	1.60872	0.340877	0.194667		1	0.794714	0.0376059	0.0146808	0.00208524	1	1	0.939237	0.478185	0.693908	0.0163481	0.0264633	1.00654	1.02493
protein_coding	methionine sulfoxide reductase B9	NA	methionine sulfoxide reductase B9 (MSRB9); FUNCTIONS IN: peptide-methionine-(S)-S-oxide reductase activity; INVOLVED IN: oxidation reduction; LOCATED IN: cytosol; EXPRESSED IN: 18 plant structures; EXPRESSED DURING: 12 growth stages; CONTAINS InterPro DOMAIN/s: Methionine sulphoxide reductase B (InterPro:IPR002579), Mss4-like (InterPro:IPR011057); BEST Arabidopsis thaliana protein match is: methi…	AT4G21850	2.61966	0.830178	NE	1.63729	2.68545	0.861521	-0.0754542	NE	0.902267	-0.652114	1.3245	2.43429	2.41131	-0.289119		0.408691	0.482471	NA	0.397832	3.82e-06	1	1	NA	0.860812	1	0.0272647	0.00427699	0.0398333	1.05296
protein_coding	PLAT/LH2 domain-containing lipoxygenase family protein	NA	PLAT/LH2 domain-containing lipoxygenase family protein; FUNCTIONS IN: oxidoreductase activity, acting on single donors with incorporation of molecular oxygen, incorporation of two atoms of oxygen, lipoxygenase activity, iron ion binding, metal ion binding; INVOLVED IN: growth, jasmonic acid biosynthetic process, response to wounding, defense response; LOCATED IN: chloroplast; EXPRESSED IN: 17 pla…	AT1G72520	0.982151	0.267152	0.215602	2.1814	3.47775	0.311021	-0.583844	0.102368	1.18978	0.58127	0.794571	1.82767	2.84529	0.653779		1	0.914344	0.856767	0.0359884	9.62e-11	1	0.912476	1	0.357693	0.835461	0.21174	0.016338	0.0270889	0.644344
protein_coding	autoinhibited Ca2+-ATPase 11	NA	autoinhibited Ca2+-ATPase 11 (ACA11); FUNCTIONS IN: calcium-transporting ATPase activity, calmodulin binding; INVOLVED IN: defense response to bacterium, negative regulation of programmed cell death, anion homeostasis; LOCATED IN: plant-type vacuole membrane, chloroplast, plasma membrane, vacuole; EXPRESSED IN: 26 plant structures; EXPRESSED DURING: 15 growth stages; CONTAINS InterPro DOMAIN/s: A…	AT3G57330	1.20637	0.704913	0.747032	3.0126	2.55554	0.563001	-0.18406	0.495962	2.35889	0.104132	1.2903	1.7552	0.209365	-0.0561989		1	0.342966	0.443047	0.00499908	0.00176325	1	1	0.856514	0.0279266	1	0.0312427	0.0185588	1.20496	0.962998
protein_coding	monodehydroascorbate reductase	Encodes a member of the monodehydroascorbate reductase gene family. Critical for a mutualistic symbiosis between the host Arabidopsis and the root colonizing fungus Piriformospora indica.	monodehydroascorbate reductase (MDHAR); FUNCTIONS IN: monodehydroascorbate reductase (NADH) activity; INVOLVED IN: response to jasmonic acid stimulus, regulation of symbiosis, encompassing mutualism through parasitism, response to water deprivation, response to salt stress, response to symbiotic fungus; LOCATED IN: cytosol; EXPRESSED IN: 13 plant structures; EXPRESSED DURING: 7 growth stages; CON…	AT3G09940	1.96421	NE	NE	3.94336	4.92221	0.131901	NE	NE	NE	NE	1.65722	2.13045	3.65869	0.175303		1	NA	NA	0.076792	0.000678999	1	NA	NA	NA	NA	0.0117462	0.00758419	0.011551	1.21802
protein_coding	allene oxide cyclase 3	Encodes allene oxide cyclase, one of the enzymes involved in jasmonic acid biosynthesis. One of four genes in Arabidopsis that encode this enzyme. mRNA expression is upregulated in senescing leaves. Note: Nomenclature for Arabidopsis allene oxide cyclase 3 (AOC3, AT3G25780) gene is based on Stenzel et al. 2003 Plant Molecular Biology 51:895-911. AOC3 (AT3G25780) is also referred to as AOC2 in He …	allene oxide cyclase 3 (AOC3); FUNCTIONS IN: allene-oxide cyclase activity; INVOLVED IN: response to salt stress, response to fungus, jasmonic acid biosynthetic process; LOCATED IN: plasma membrane, membrane; EXPRESSED IN: 20 plant structures; EXPRESSED DURING: 14 growth stages; CONTAINS InterPro DOMAIN/s: Allene oxide cyclase (InterPro:IPR009410); BEST Arabidopsis thaliana protein match is: alle…	AT3G25780	0.742955	0.567318	2.306	3.70372	5.67845	-0.192442	NE	NE	0.54736	NE	1.31354	1.61473	2.2716	0.586636		1	0.795916	0.00674508	0.000189552	9.02e-26	1	NA	NA	0.931146	NA	0.0445149	0.0271113	0.0473514	0.615935
protein_coding	receptor like protein 40	NA	receptor like protein 40 (RLP40); INVOLVED IN: signal transduction; LOCATED IN: endomembrane system; EXPRESSED IN: stem, sepal, leaf, stamen; EXPRESSED DURING: LP.04 four leaves visible, 4 anthesis, petal differentiation and expansion stage; CONTAINS InterPro DOMAIN/s: Leucine-rich repeat, typical subtype (InterPro:IPR003591), Leucine-rich repeat (InterPro:IPR001611); BEST Arabidopsis thaliana pr…	AT3G24982	NE	NE	NE	NE	3.9125	NE	NE	NE	NE	NE	0.474882	1.07969	-0.0254305	-0.100095		NA	NA	NA	NA	0.000458972	NA	NA	NA	NA	NA	0.63773	0.110713	1.01934	1.00278
protein_coding	calmodulin-like 38	NA	calmodulin-like 38 (CML38); CONTAINS InterPro DOMAIN/s: EF-Hand 1, calcium-binding site (InterPro:IPR018247), EF-HAND 2 (InterPro:IPR018249), EF-hand-like domain (InterPro:IPR011992), Calcium-binding EF-hand (InterPro:IPR002048); BEST Arabidopsis thaliana protein match is: Calcium-binding EF-hand family protein (TAIR:AT1G76640.1).	AT1G76650	0.746155	NE	NE	NE	3.69575	0.942387	NE	NE	NE	1.62184	1.06323	2.09904	1.66006	0.730871		1	NA	NA	NA	1.17e-06	1	NA	NA	NA	0.366875	0.114058	0.00831922	0.0897598	0.389786
protein_coding	polygalacturonase inhibiting protein 1	Encodes a polygalacturonase inhibiting protein involved in defense response. PGIPs inhibit the function of cell wall pectin degrading enzymes such as those produced by fungal pathogens. PGIP1 is induced by fungal infection.	polygalacturonase inhibiting protein 1 (PGIP1); FUNCTIONS IN: polygalacturonase inhibitor activity; INVOLVED IN: signal transduction, defense response; LOCATED IN: cell wall, plant-type cell wall; EXPRESSED IN: 20 plant structures; EXPRESSED DURING: 13 growth stages; CONTAINS InterPro DOMAIN/s: Leucine-rich repeat-containing N-terminal domain, type 2 (InterPro:IPR013210), Leucine-rich repeat (Int…	AT5G06860	NE	NE	NE	0.873914	3.86469	NE	NE	NE	-0.379879	NE	1.34882	0.980698	0.460046	0.118467		NA	NA	NA	0.749298	0.000225969	NA	NA	NA	1	NA	0.0260682	0.122295	0.832765	0.969959
protein_coding	NA	NA	unknown protein; BEST Arabidopsis thaliana protein match is: unknown protein (TAIR:AT5G12010.1); Has 945 Blast hits to 944 proteins in 87 species: Archae - 0; Bacteria - 0; Metazoa - 519; Fungi - 43; Plants - 365; Viruses - 0; Other Eukaryotes - 18 (source: NCBI BLink).	AT4G29780	-0.38042	1.35068	0.664771	2.29358	4.85996	0.781302	NE	NE	NE	NE	0.852886	1.5523	0.578544	0.253741		1	0.379228	0.519494	0.177621	0.00117633	1	NA	NA	NA	NA	0.131727	0.0292348	0.587234	1.02707
protein_coding	methionine sulfoxide reductase B7	NA	methionine sulfoxide reductase B7 (MSRB7); CONTAINS InterPro DOMAIN/s: Methionine sulphoxide reductase B (InterPro:IPR002579), Mss4-like (InterPro:IPR011057); BEST Arabidopsis thaliana protein match is: methionine sulfoxide reductase B8 (TAIR:AT4G21840.1); Has 8390 Blast hits to 8387 proteins in 2248 species: Archae - 76; Bacteria - 4942; Metazoa - 265; Fungi - 135; Plants - 208; Viruses - 1; Oth…	AT4G21830	1.72116	NE	NE	NE	4.72677	NE	NE	NE	NE	NE	0.476523	2.93886	3.18497	0.869853		1	NA	NA	NA	0.00196058	NA	NA	NA	NA	NA	0.602185	0.00137594	0.01975	0.397024
protein_coding	NA	NA	unknown protein; FUNCTIONS IN: molecular_function unknown; INVOLVED IN: biological_process unknown; LOCATED IN: endomembrane system; EXPRESSED IN: 15 plant structures; EXPRESSED DURING: 9 growth stages; BEST Arabidopsis thaliana protein match is: unknown protein (TAIR:AT5G54145.1); Has 30201 Blast hits to 17322 proteins in 780 species: Archae - 12; Bacteria - 1396; Metazoa - 17338; Fungi - 3422; …	AT4G27657	1.01366	0.00738816	0.572811	0.43681	-1.40995	1.08355	0.819371	1.57861	1.47129	-0.329509	0.285425	1.44997	-0.418234	0.394138		1	0.876183	0.457188	0.613711	0.0364833	1	0.545324	0.0112298	0.007135	0.664394	1.01786	0.039	0.923349	1.19268
protein_coding	RING/U-box superfamily protein	NA	RING/U-box superfamily protein; FUNCTIONS IN: zinc ion binding; EXPRESSED IN: 19 plant structures; EXPRESSED DURING: 11 growth stages; CONTAINS InterPro DOMAIN/s: Zinc finger, RING-type (InterPro:IPR001841), Zinc finger, C3HC4 RING-type (InterPro:IPR018957); BEST Arabidopsis thaliana protein match is: RING/U-box superfamily protein (TAIR:AT5G47610.1); Has 30201 Blast hits to 17322 proteins in 780…	AT4G17245	0.215316	1.4469	0.218566	1.01012	0.124515	0.799608	1.72731	0.157718	2.3397	1.50894	1.21968	0.560804	-0.127097	0.0336201		1	0.00912015	0.955468	0.259736	0.960784	1	0.00856051	1	0.000196002	9.46e-05	0.0365931	0.42677	1.0924	1.16037
protein_coding	F-box family protein	NA	F-box family protein; CONTAINS InterPro DOMAIN/s: Leucine-rich repeat, cysteine-containing subtype (InterPro:IPR006553); BEST Arabidopsis thaliana protein match is: RNI-like superfamily protein (TAIR:AT5G01720.1); Has 30201 Blast hits to 17322 proteins in 780 species: Archae - 12; Bacteria - 1396; Metazoa - 17338; Fungi - 3422; Plants - 5037; Viruses - 0; Other Eukaryotes - 2996 (source: NCBI BLi…	AT5G27920	2.46135	-0.359795	0.256389	-0.281293	1.17544	1.5777	0.175577	-0.211662	0.615852	1.92784	0.970406	1.41808	-0.230482	-0.128831		0.836647	0.805122	0.838868	0.93808	0.0267578	1	0.965099	0.816559	0.366389	0.000390778	0.0861419	0.0408295	1.09936	1.02534
protein_coding	Protein of unknown function (DUF581)	NA	Protein of unknown function (DUF581); CONTAINS InterPro DOMAIN/s: Protein of unknown function DUF581 (InterPro:IPR007650); BEST Arabidopsis thaliana protein match is: Protein of unknown function (DUF581) (TAIR:AT5G47060.1); Has 30201 Blast hits to 17322 proteins in 780 species: Archae - 12; Bacteria - 1396; Metazoa - 17338; Fungi - 3422; Plants - 5037; Viruses - 0; Other Eukaryotes - 2996 (source…	AT4G17670	0.881221	-0.31044	0.283224	0.502763	1.21715	1.12456	0.472781	0.777554	0.395633	1.04575	0.623071	2.53537	-0.595054	-0.896056		1	0.738964	0.731052	0.755933	0.0082841	1	0.76701	0.147616	0.87832	0.108737	0.397388	0.00354822	0.590053	0.613159
protein_coding	Protein of unknown function, DUF617	NA	Protein of unknown function, DUF617; CONTAINS InterPro DOMAIN/s: Protein of unknown function DUF617, plant (InterPro:IPR006460); BEST Arabidopsis thaliana protein match is: Protein of unknown function, DUF617 (TAIR:AT1G76610.1); Has 257 Blast hits to 256 proteins in 14 species: Archae - 0; Bacteria - 0; Metazoa - 0; Fungi - 0; Plants - 257; Viruses - 0; Other Eukaryotes - 0 (source: NCBI BLink).	AT1G21050	1.20828	0.24207	0.148964	0.803607	2.30427	0.698477	0.264688	-0.744479	0.547581	1.75629	1.9872	1.45841	-0.218634	0.248143		1	0.811146	0.949733	0.735971	0.00990073	1	0.813878	0.332275	1	0.118686	0.00449754	0.0355659	1.09978	1.21598
protein_coding	RELA/SPOT homolog 2	NA	RELA/SPOT homolog 2 (RSH2); CONTAINS InterPro DOMAIN/s: Metal-dependent phosphohydrolase, HD subdomain (InterPro:IPR006674), Metal-dependent phosphohydrolase, HD domain (InterPro:IPR003607), RelA/SpoT (InterPro:IPR007685); BEST Arabidopsis thaliana protein match is: RELA/SPOT homolog 3 (TAIR:AT1G54130.1); Has 12447 Blast hits to 12322 proteins in 2456 species: Archae - 4; Bacteria - 8610; Metazoa…	AT3G14050	0.87838	-0.086586	0.502708	0.435049	1.29468	0.745763	-0.183758	0.0742541	0.268916	0.93763	1.32726	1.60257	1.03104	0.402185		1	1	0.428213	0.541161	3.25e-05	1	0.958251	0.760832	0.717518	0.0225731	0.0295261	0.0264264	0.221906	0.947967
protein_coding	ALA-interacting subunit 1	Physically interacts with ALA3, and is required for the phospholipid translocase activity of ALA3.	ALA-interacting subunit 1 (ALIS1); CONTAINS InterPro DOMAIN/s: Protein of unknown function DUF284, transmembrane eukaryotic (InterPro:IPR005045); BEST Arabidopsis thaliana protein match is: LEM3 (ligand-effect modulator 3) family protein / CDC50 family protein (TAIR:AT1G54320.1); Has 864 Blast hits to 864 proteins in 218 species: Archae - 0; Bacteria - 0; Metazoa - 252; Fungi - 234; Plants - 160;…	AT3G12740	0.655278	0.338594	0.244243	0.672409	0.937012	0.362728	-0.312034	-0.208898	0.860067	1.1738	1.374	1.41245	0.149775	-0.251003		1	0.454515	0.738211	0.18959	0.000815204	1	0.901016	0.847156	0.024161	0.000883636	0.0240583	0.0413525	1.19926	0.978732
protein_coding	anthranilate synthase alpha subunit 1	ASA1 encodes the alpha subunit of anthranilate synthase, which catalyzes the rate-limiting step of tryptophan synthesis. ASA1 is induced by ethylene, and forms a link between ethylene signalling and auxin synthesis in roots.	anthranilate synthase alpha subunit 1 (ASA1); CONTAINS InterPro DOMAIN/s: Anthranilate synthase component I, N-terminal (InterPro:IPR006805), Chorismate binding, C-terminal (InterPro:IPR015890), ADC synthase (InterPro:IPR005801), Anthranilate synthase component I (InterPro:IPR019999), Anthranilate synthase component I, PabB-like (InterPro:IPR005256); BEST Arabidopsis thaliana protein match is: an…	AT5G05730	0.524149	0.66784	0.559772	1.07315	1.5765	-0.312114	0.160747	-0.0112774	0.992551	1.13318	1.44471	1.2987	2.47071	0.380628		1	0.144979	0.409411	0.0720218	8.92e-07	1	0.945605	0.996689	0.062044	0.00435557	0.0189315	0.0522354	0.0395591	0.902454
protein_coding	ferrochelatase 1	encodes ferrochelatase I located in plastids. Involved in heme biosynthesis in non-photosynthetic tissues and induced by oxidative stress in photosynthetic tissues to supply heme for defensive hemoproteins	ferrochelatase 1 (FC1); FUNCTIONS IN: ferrochelatase activity; INVOLVED IN: response to oxidative stress, heme biosynthetic process, tetrapyrrole biosynthetic process; LOCATED IN: mitochondrion, chloroplast, plastid; EXPRESSED IN: 24 plant structures; EXPRESSED DURING: 14 growth stages; CONTAINS InterPro DOMAIN/s: Ferrochelatase, active site (InterPro:IPR019772), Ferrochelatase (InterPro:IPR00101…	AT5G26030	0.654479	0.500782	0.726317	1.10222	1.63045	0.404943	-0.0908922	0.295388	0.692461	1.34803	1.29345	1.38403	0.476943	0.150017		1	0.255038	0.269442	0.0684991	2.6e-06	1	1	0.577282	0.140228	0.000412393	0.0315078	0.043292	0.67865	1.2084
protein_coding	Major facilitator superfamily protein	encodes a putative sucrose transporter whose gene expression is induced by dehydration and cold.	EARLY RESPONSE TO DEHYDRATION 6 (ERD6); FUNCTIONS IN: carbohydrate transmembrane transporter activity, sugar:hydrogen symporter activity, sugar transmembrane transporter activity; INVOLVED IN: response to water deprivation, response to salt stress, response to cold, response to chitin, response to abscisic acid stimulus; LOCATED IN: integral to membrane, membrane; EXPRESSED IN: 30 plant structure…	AT1G08930	1.08349	0.481438	0.905371	0.745824	1.07353	0.749739	0.0730599	-0.180254	0.887888	1.52055	1.24464	1.54326	-0.255327	-0.120426		1	0.262188	0.116423	0.301182	0.000106176	1	1	0.874199	0.0934258	3.8e-06	0.0352794	0.0293226	1.09287	0.965328
protein_coding	Plant protein of unknown function (DUF946)	NA	Plant protein of unknown function (DUF946); CONTAINS InterPro DOMAIN/s: Protein of unknown function DUF946 (InterPro:IPR009291); BEST Arabidopsis thaliana protein match is: Plant protein of unknown function (DUF946) (TAIR:AT3G04350.1); Has 1807 Blast hits to 1807 proteins in 277 species: Archae - 0; Bacteria - 0; Metazoa - 736; Fungi - 347; Plants - 385; Viruses - 0; Other Eukaryotes - 339 (sourc…	AT5G18490	0.875828	0.0532842	0.532067	1.08922	1.31088	0.608589	-0.0767858	-0.473052	0.856988	1.03986	1.53999	1.83747	0.399484	0.0251219		1	1	0.408621	0.141079	0.00271813	1	1	0.865081	0.249491	0.0604137	0.0160747	0.0157637	0.916811	1.19851
protein_coding	NA	NA	unknown protein; FUNCTIONS IN: molecular_function unknown; INVOLVED IN: biological_process unknown; LOCATED IN: chloroplast; EXPRESSED IN: 21 plant structures; EXPRESSED DURING: 13 growth stages; Has 5 Blast hits to 5 proteins in 1 species: Archae - 0; Bacteria - 0; Metazoa - 0; Fungi - 0; Plants - 5; Viruses - 0; Other Eukaryotes - 0 (source: NCBI BLink).	AT3G03020	0.534341	-0.233826	0.306013	1.65568	1.46018	0.832259	0.055556	-0.185173	0.68914	0.751035	1.06283	1.63032	-0.398437	-0.290062		1	0.844664	0.681362	0.00235864	9.49e-05	1	1	1	0.43964	0.184677	0.062635	0.0248431	0.921892	1.0807
protein_coding	zinc finger (C3HC4-type RING finger) family protein	NA	zinc finger (C3HC4-type RING finger) family protein; FUNCTIONS IN: zinc ion binding; INVOLVED IN: response to chitin; EXPRESSED IN: 24 plant structures; EXPRESSED DURING: 15 growth stages; CONTAINS InterPro DOMAIN/s: Zinc finger, RING-type (InterPro:IPR001841), Zinc finger, C3HC4 RING-type (InterPro:IPR018957), Protein of unknown function DUF1117 (InterPro:IPR010543); BEST Arabidopsis thaliana pr…	AT5G59550	1.50248	-0.200275	0.0129108	0.979797	1.06214	1.55862	-0.548388	-0.160515	0.774974	0.826041	1.28602	1.52039	0.407071	0.472935		1	1	0.910559	0.174326	0.00265701	1	0.63855	0.906098	0.364631	0.0487104	0.034722	0.0313005	0.849351	0.951074
protein_coding	Xyloglucan endotransglucosylase/hydrolase family protein	Encodes a cell wall-modifying enzyme, rapidly upregulated in response to environmental stimuli	Touch 4 (TCH4); CONTAINS InterPro DOMAIN/s: Xyloglucan endotransglucosylase/hydrolase (InterPro:IPR016455), Xyloglucan endo-transglycosylase, C-terminal (InterPro:IPR010713), Concanavalin A-like lectin/glucanase, subgroup (InterPro:IPR013320), Concanavalin A-like lectin/glucanase (InterPro:IPR008985), Glycoside hydrolase, family 16 (InterPro:IPR000757), Glycoside hydrolase, family 16, active site…	AT5G57560	0.732174	0.0282444	0.919392	1.19127	2.72094	1.37157	0.301683	0.782577	0.152526	1.57476	1.02526	1.63412	-0.689175	0.0762638		1	1	0.0857459	0.319863	1.55e-12	1	0.921459	0.134137	1	0.00549784	0.105039	0.0285549	0.447266	1.22017
protein_coding	NA	NA	unknown protein; FUNCTIONS IN: molecular_function unknown; INVOLVED IN: response to wounding; LOCATED IN: endomembrane system; EXPRESSED IN: 23 plant structures; EXPRESSED DURING: 13 growth stages; BEST Arabidopsis thaliana protein match is: unknown protein (TAIR:AT1G32928.1); Has 42 Blast hits to 42 proteins in 8 species: Archae - 0; Bacteria - 0; Metazoa - 0; Fungi - 0; Plants - 42; Viruses - 0…	AT1G32920	1.98279	0.603889	0.538449	1.3302	1.11602	1.99943	0.557616	0.897281	0.573999	0.2593	1.07154	1.45113	1.02947	0.697573		0.755851	0.301502	0.494011	0.0120536	0.00243505	1	0.665797	0.0979431	0.3989	0.841197	0.108307	0.0434512	0.193374	0.595042
protein_coding	NA	NA	unknown protein; FUNCTIONS IN: molecular_function unknown; INVOLVED IN: biological_process unknown; LOCATED IN: endomembrane system; EXPRESSED IN: 19 plant structures; EXPRESSED DURING: 11 growth stages; Has 17 Blast hits to 17 proteins in 2 species: Archae - 0; Bacteria - 0; Metazoa - 0; Fungi - 0; Plants - 17; Viruses - 0; Other Eukaryotes - 0 (source: NCBI BLink).	AT1G22890	1.37828	0.33701	0.655248	0.0688942	0.620731	1.31631	0.451769	0.812763	1.62214	1.6792	2.01413	1.8468	0.0301904	-0.111165		1	0.735829	0.45188	0.988688	0.198299	1	0.880007	0.184724	0.0105689	1.27e-06	0.00390104	0.0146565	1.15048	0.97203
protein_coding	RING/U-box superfamily protein	Encodes a putative RING-H2 zinc finger protein ATL6 (ATL6).	ATL6; FUNCTIONS IN: zinc ion binding; INVOLVED IN: response to chitin; LOCATED IN: plasma membrane; EXPRESSED IN: 22 plant structures; EXPRESSED DURING: 12 growth stages; CONTAINS InterPro DOMAIN/s: Zinc finger, RING-type (InterPro:IPR001841), Zinc finger, C3HC4 RING-type (InterPro:IPR018957); BEST Arabidopsis thaliana protein match is: carbon/nitrogen insensitive 1 (TAIR:AT5G27420.1); Has 9947 B…	AT3G05200	2.15984	0.812305	0.681612	1.12153	0.810566	1.96871	0.635869	0.821384	1.78347	1.17648	1.45107	1.65207	0.19357	0.481179		1	0.216608	0.303472	0.161351	0.121822	1	0.716779	0.135215	0.00129299	0.0273543	0.0188243	0.0232177	1.20584	0.621003
protein_coding	TOXICOS EN LEVADURA 2	RING-H2 protein induced after exposure to chitin or inactivated crude cellulase preparations.	TOXICOS EN LEVADURA 2 (ATL2); FUNCTIONS IN: zinc ion binding; INVOLVED IN: response to chitin, defense response; EXPRESSED IN: 22 plant structures; EXPRESSED DURING: 13 growth stages; CONTAINS InterPro DOMAIN/s: Zinc finger, RING-type (InterPro:IPR001841), Zinc finger, C3HC4 RING-type (InterPro:IPR018957); BEST Arabidopsis thaliana protein match is: RING/U-box superfamily protein (TAIR:AT4G15975.…	AT3G16720	1.66127	1.28102	0.768535	0.828248	1.08173	1.36996	0.853723	0.0768998	1.20622	0.646937	1.38728	1.89097	0.437234	-0.515729		1	0.0359246	0.369323	0.234467	0.00335758	1	0.669448	0.980619	0.044732	0.260977	0.0233756	0.0136834	0.853346	1.15864
protein_coding	Major facilitator superfamily protein	NA	Major facilitator superfamily protein; FUNCTIONS IN: carbohydrate transmembrane transporter activity, sugar:hydrogen symporter activity; INVOLVED IN: transport, transmembrane transport; LOCATED IN: integral to membrane, membrane; EXPRESSED IN: 19 plant structures; EXPRESSED DURING: 10 growth stages; CONTAINS InterPro DOMAIN/s: Sugar transporter, conserved site (InterPro:IPR005829), Major facilita…	AT4G36670	1.86067	1.34086	1.49831	1.52332	1.49301	0.828377	0.529257	0.58279	1.05894	1.66887	1.75823	1.42074	1.07716	0.715464		0.86511	0.0457361	0.00763	0.0268562	0.00164227	1	0.852862	0.529104	0.180834	0.00128692	0.00886429	0.0393396	0.188149	0.361746
protein_coding	calmodulin 2	Encodes a touch-inducible calmodulin that has higher affinity to kinesin-like calmodulin binding motor protein than CAM4 or CAM6.	calmodulin 2 (CAM2); CONTAINS InterPro DOMAIN/s: EF-Hand 1, calcium-binding site (InterPro:IPR018247), EF-HAND 2 (InterPro:IPR018249), EF-hand-like domain (InterPro:IPR011992), Calcium-binding EF-hand (InterPro:IPR002048), EF-hand (InterPro:IPR018248); BEST Arabidopsis thaliana protein match is: calmodulin 5 (TAIR:AT2G27030.3).	AT2G41110	0.878548	0.816695	0.771967	2.04868	1.15038	0.556782	0.811592	0.719876	0.826196	-0.262031	1.62557	2.03798	-0.145225	-0.0511929		1	0.111841	0.139941	5.34e-05	6e-05	1	0.372186	0.173898	0.300361	0.799361	0.0108513	0.00940729	1.09184	0.994477
protein_coding	Protein of unknown function (DUF1195)	NA	Protein of unknown function (DUF1195); CONTAINS InterPro DOMAIN/s: Protein of unknown function DUF1195 (InterPro:IPR010608); BEST Arabidopsis thaliana protein match is: Protein of unknown function (DUF1195) (TAIR:AT4G36660.1); Has 67 Blast hits to 67 proteins in 15 species: Archae - 0; Bacteria - 0; Metazoa - 0; Fungi - 0; Plants - 67; Viruses - 0; Other Eukaryotes - 0 (source: NCBI BLink).	AT1G19380	1.01902	0.577175	0.997792	1.13442	2.30863	-0.080243	0.129387	0.402204	0.19289	0.178646	1.43814	1.47833	-0.608462	-0.0890257		1	0.466413	0.0894802	0.31956	2.04e-08	1	0.982368	0.62543	1	1	0.018804	0.0348474	0.617397	0.984571
protein_coding	UDP-glucosyl transferase 71B6	Encodes a protein with UDP-glucosyl transferase activity that was shown to preferentially glucosylates abscisic acid (ABA), and not its catabolites. Moreover, UGT71B6 was shown to have a strict preference for the naturally-occurring ABA enantiomer, (+)-ABA, and not its 'unnatural' relative, (-)-ABA. This is in contrast to the other identified UGT genes catalyzing the glucosylation of ABA which we…	UDP-glucosyl transferase 71B6 (UGT71B6); FUNCTIONS IN: UDP-glycosyltransferase activity, transferase activity, transferring glycosyl groups, abscisic acid glucosyltransferase activity; INVOLVED IN: response to salt stress, response to abscisic acid stimulus, response to osmotic stress, abscisic acid catabolic process; LOCATED IN: membrane; EXPRESSED IN: stem, rosette leaf, cultured cell, stamen, …	AT3G21780	NE	NE	1.59281	1.09624	2.25387	NE	NE	NE	0.375842	1.17517	1.00184	2.1393	0.0104255	0.191739		NA	NA	0.106246	0.506781	0.00203448	NA	NA	NA	0.86224	0.583584	0.0938971	0.00787625	1.08101	1.18934
protein_coding	NAC domain containing protein 53	NA	NAC domain containing protein 53 (NAC053); FUNCTIONS IN: sequence-specific DNA binding transcription factor activity; INVOLVED IN: multicellular organismal development, regulation of transcription; LOCATED IN: cellular_component unknown; EXPRESSED IN: 22 plant structures; EXPRESSED DURING: 13 growth stages; CONTAINS InterPro DOMAIN/s: No apical meristem (NAM) protein (InterPro:IPR003441); BEST Ar…	AT3G10500	-0.0971284	0.796298	1.73816	0.782529	2.16097	-0.0330333	0.548682	0.402009	0.691641	0.864309	1.47408	1.97517	0.21699	-0.426582		1	0.339815	0.012471	0.557954	0.000106432	1	0.845214	0.902229	0.584711	0.603445	0.0165578	0.0106945	1.19452	1.08547
protein_coding	cysteine-rich RLK (RECEPTOR-like protein kinase) 40	Encodes a cysteine-rich receptor-like protein kinase.	cysteine-rich RLK (RECEPTOR-like protein kinase) 40 (CRK40); FUNCTIONS IN: kinase activity; INVOLVED IN: protein amino acid phosphorylation; LOCATED IN: endomembrane system; CONTAINS InterPro DOMAIN/s: Protein kinase, ATP binding site (InterPro:IPR017441), Serine/threonine-protein kinase domain (InterPro:IPR002290), Protein of unknown function DUF26 (InterPro:IPR002902), Serine/threonine-protein …	AT4G04570	0.493049	0.64173	1.20083	1.47218	1.88997	0.45333	0.0498724	0.310408	0.438806	0.616273	0.837122	2.21874	-0.112506	-0.0464427		1	0.444956	0.134236	0.136115	4.91e-05	1	1	0.82476	0.839022	0.737487	0.144766	0.00630712	1.08597	0.952485
protein_coding	2-oxoglutarate (2OG) and Fe(II)-dependent oxygenase superfamily protein	encodes a protein whose sequence is similar to flavanone 3 hydroxylase from Malus.	2-oxoglutarate (2OG) and Fe(II)-dependent oxygenase superfamily protein; CONTAINS InterPro DOMAIN/s: Oxoglutarate/iron-dependent oxygenase (InterPro:IPR005123); BEST Arabidopsis thaliana protein match is: 2-oxoglutarate (2OG) and Fe(II)-dependent oxygenase superfamily protein (TAIR:AT1G49390.1); Has 8498 Blast hits to 8450 proteins in 980 species: Archae - 0; Bacteria - 1051; Metazoa - 121; Fungi…	AT5G20400	0.43185	0.345497	1.4416	1.03185	2.32481	0.530584	-0.7654	-0.0457492	NE	0.486366	0.915938	1.45047	-0.582436	0.0326416		1	0.89516	0.125935	0.443977	0.000192919	1	0.816014	0.954767	NA	1	0.156311	0.0370065	0.653813	1.10563
protein_coding	lysm domain GPI-anchored protein 2 precursor	NA	lysm domain GPI-anchored protein 2 precursor (LYM2); FUNCTIONS IN: molecular_function unknown; INVOLVED IN: cell wall macromolecule catabolic process; LOCATED IN: anchored to plasma membrane, plasma membrane, anchored to membrane; EXPRESSED IN: 24 plant structures; EXPRESSED DURING: 13 growth stages; CONTAINS InterPro DOMAIN/s: Peptidoglycan-binding lysin domain (InterPro:IPR018392), Peptidoglyca…	AT2G17120	0.918831	1.03792	1.23191	1.30631	0.857747	0.598362	-0.174433	-0.114275	0.378357	0.0465336	1.65917	1.42966	-0.392029	-0.41625		1	0.00615058	0.0366853	0.00162759	0.00895477	1	0.851666	0.951047	0.345317	1	0.010724	0.0402043	0.944436	1.15549
protein_coding	germin-like protein 5	germin-like protein (GLP5)	germin-like protein 5 (GLP5); FUNCTIONS IN: manganese ion binding, nutrient reservoir activity; INVOLVED IN: response to cold; LOCATED IN: cell wall, nucleus; EXPRESSED IN: 22 plant structures; EXPRESSED DURING: 14 growth stages; CONTAINS InterPro DOMAIN/s: Cupin, RmlC-type (InterPro:IPR011051), Cupin 1 (InterPro:IPR006045), Germin (InterPro:IPR001929), RmlC-like jelly roll fold (InterPro:IPR0147…	AT1G09560	1.08645	1.10982	1.25676	1.38836	0.903214	0.955422	0.533688	0.305302	0.367413	0.0329624	1.74225	1.61054	-0.625857	-0.0291369		1	0.00112049	0.0133252	0.00164525	0.00054254	1	0.770703	0.687925	0.369783	0.972849	0.00847253	0.02658	0.537272	0.957198
protein_coding	Cold acclimation protein WCOR413 family	NA	Cold acclimation protein WCOR413 family; FUNCTIONS IN: molecular_function unknown; INVOLVED IN: response to stress; LOCATED IN: membrane; EXPRESSED IN: 6 plant structures; EXPRESSED DURING: LP.06 six leaves visible, LP.04 four leaves visible, 4 anthesis, LP.10 ten leaves visible, LP.08 eight leaves visible; CONTAINS InterPro DOMAIN/s: Cold acclimation WCOR413 (InterPro:IPR008892); BEST Arabidopsi…	AT2G23680	1.62639	1.8088	1.11086	1.15621	1.36503	1.11189	0.721117	-0.250974	0.226219	-0.0168113	1.99336	2.16233	0.505816	-0.409915		1	0.00510028	0.204544	0.196538	0.00702257	1	0.748976	0.91757	0.839117	1	0.00451485	0.00761644	0.742862	1.04373
protein_coding	exocyst subunit exo70 family protein B2	A member of EXO70 gene family, putative exocyst subunits, conserved in land plants. Arabidopsis thaliana contains 23 putative EXO70 genes, which can be classified into eight clusters on the phylogenetic tree.	exocyst subunit exo70 family protein B2 (EXO70B2); INVOLVED IN: exocytosis, vesicle docking involved in exocytosis; LOCATED IN: cytosol, nucleus, plasma membrane, exocyst; EXPRESSED IN: 19 plant structures; EXPRESSED DURING: 12 growth stages; CONTAINS InterPro DOMAIN/s: Exo70 exocyst complex subunit (InterPro:IPR004140); BEST Arabidopsis thaliana protein match is: exocyst subunit exo70 family pro…	AT1G07000	1.29819	1.4139	0.458259	0.900862	1.36092	0.658919	0.914067	-0.2345	0.0266478	0.343451	2.08966	2.45284	0.0397454	-0.293475		1	0.0445938	0.60867	0.317746	0.00232112	1	0.616708	0.896638	0.974648	0.845915	0.00349162	0.00428774	1.11341	1.07747
protein_coding	calcium ATPase 2	Encodes a calmodulin-regulated Ca(2+)-pump located in the endoplasmic reticulum. Belongs to plant 2B ATPase's with an N-terminal autoinhibitor.	calcium ATPase 2 (ACA2); FUNCTIONS IN: calcium-transporting ATPase activity, calmodulin binding, calcium ion transmembrane transporter activity; INVOLVED IN: transport; LOCATED IN: endoplasmic reticulum, plasma membrane, endoplasmic reticulum membrane; EXPRESSED IN: 25 plant structures; EXPRESSED DURING: 15 growth stages; CONTAINS InterPro DOMAIN/s: ATPase, P-type, ATPase-associated domain (Inter…	AT4G37640	0.746103	1.73838	0.189488	0.525179	0.606915	0.358221	1.17852	-0.603919	0.00992268	0.522888	1.56577	1.83399	-0.00136058	-0.421161		1	0.000633137	0.765176	0.542791	0.403406	1	0.267295	0.510318	1	0.562916	0.0129196	0.015103	1.0232	1.07018
protein_coding	Leucine-rich repeat receptor-like protein kinase family protein	NA	Leucine-rich repeat receptor-like protein kinase family protein; FUNCTIONS IN: kinase activity; INVOLVED IN: protein amino acid phosphorylation; LOCATED IN: plasma membrane, membrane; EXPRESSED IN: 23 plant structures; EXPRESSED DURING: 13 growth stages; CONTAINS InterPro DOMAIN/s: Protein kinase, ATP binding site (InterPro:IPR017441), Protein kinase, catalytic domain (InterPro:IPR000719), Leucin…	AT4G08850	0.620537	1.27961	0.0858748	0.111151	0.0255949	0.505425	0.822013	-0.285898	-0.0699303	-0.0224504	1.84616	2.19537	-1.19139	-0.560761		1	0.00250702	0.972353	1	0.989292	1	0.373924	0.729948	1	0.986663	0.00709917	0.00732982	0.120416	1.12984
protein_coding	aminophospholipid ATPase 1	Encodes a putative aminophospholipid translocase (p-type ATPase) involved in chilling response.	aminophospholipid ATPase 1 (ALA1); FUNCTIONS IN: protein binding, ATPase activity, coupled to transmembrane movement of ions, phosphorylative mechanism; INVOLVED IN: metabolic process, phospholipid transport, ATP biosynthetic process; LOCATED IN: plasma membrane; EXPRESSED IN: 25 plant structures; EXPRESSED DURING: 15 growth stages; CONTAINS InterPro DOMAIN/s: Haloacid dehalogenase-like hydrolase…	AT5G04930	0.249857	1.35421	0.259813	0.651676	1.07585	0.646222	0.584327	-0.356935	-0.237438	0.0824528	1.80579	2.01705	0.256459	-0.453643		1	0.000153494	0.782945	0.240143	0.00124791	1	0.531393	0.832752	1	0.754859	0.00712346	0.00997041	1.16981	1.15251
protein_coding	secretory carrier 3	Encodes a putative secretory carrier membrane protein (SC3).	secretory carrier 3 (SC3); FUNCTIONS IN: transmembrane transporter activity; INVOLVED IN: protein transport; CONTAINS InterPro DOMAIN/s: SCAMP (InterPro:IPR007273); BEST Arabidopsis thaliana protein match is: Secretory carrier membrane protein (SCAMP) family protein (TAIR:AT1G11180.1).	AT1G61250	0.222935	1.20601	0.298356	0.680696	0.36673	0.0743772	0.70658	-0.315555	0.229481	0.025048	1.14515	1.39941	-0.195992	-0.419479		1	0.000112431	0.651506	0.1012	0.222491	1	0.365179	0.757054	0.513078	0.834641	0.0571272	0.0413323	1.09874	1.09986
protein_coding	Protein kinase superfamily protein	NA	Protein kinase superfamily protein; FUNCTIONS IN: protein serine/threonine kinase activity, protein kinase activity, kinase activity, ATP binding; INVOLVED IN: protein amino acid phosphorylation; LOCATED IN: plasma membrane; EXPRESSED IN: 23 plant structures; EXPRESSED DURING: 13 growth stages; CONTAINS InterPro DOMAIN/s: Protein kinase, ATP binding site (InterPro:IPR017441), Protein kinase, cata…	AT1G48210	0.767468	0.964333	-0.0299136	0.83758	0.273936	1.18735	0.282417	-0.559358	0.278691	-0.178021	1.17955	1.08927	-0.0945456	0.0521817		1	0.00584856	1	0.145366	0.33527	1	0.877431	0.521521	0.469397	0.827208	0.0420411	0.0883188	1.06403	1.14792
protein_coding	mitogen-activated protein kinase 3	Encodes a mitogen-activated kinase whose mRNA levels increase in response to touch, cold, salinity stress and chitin oligomers.Also functions in ovule development. Heterozygous MPK3 mutants in a homozygous MPK6 background are female sterile due to defects in integument development. MPK3 can be dephosphorylated by MKP2 in vitro.	mitogen-activated protein kinase 3 (MPK3); CONTAINS InterPro DOMAIN/s: Protein kinase, ATP binding site (InterPro:IPR017441), Serine/threonine-protein kinase domain (InterPro:IPR002290), Serine/threonine-protein kinase-like domain (InterPro:IPR017442), Protein kinase-like domain (InterPro:IPR011009), Serine/threonine-protein kinase, active site (InterPro:IPR008271), MAP kinase, conserved site (In…	AT3G45640	0.586497	0.643829	-0.103153	0.96327	0.85681	0.8502	0.394586	-0.744305	0.612434	0.0845999	1.16313	1.28873	0.0397921	0.14715		1	0.278282	0.969524	0.0220175	0.00663308	1	0.865248	0.306008	0.107368	0.992173	0.0470212	0.0538338	1.11766	1.19961
protein_coding	ADR1-like 1	NA	ADR1-like 1 (ADR1-L1); FUNCTIONS IN: ATP binding; INVOLVED IN: apoptosis, defense response; LOCATED IN: apoplast; EXPRESSED IN: 22 plant structures; EXPRESSED DURING: 13 growth stages; CONTAINS InterPro DOMAIN/s: NB-ARC (InterPro:IPR002182), Leucine-rich repeat (InterPro:IPR001611), Powdery mildew resistance protein, RPW8 domain (InterPro:IPR008808), Disease resistance protein (InterPro:IPR000767…	AT4G33300	1.05948	0.538254	0.193097	0.827628	0.95008	0.950075	-0.0326036	-0.429027	0.189807	0.316601	1.4938	1.80703	-0.560055	-0.0556785		1	0.24893	0.73025	0.179775	0.00285443	1	1	0.697865	0.687581	0.959444	0.0161383	0.015966	0.670725	0.956633
protein_coding	WRKY DNA-binding protein 25	member of WRKY Transcription Factor; Group I. Located in nucleus. Involved in response to various abiotic stresses - especially salt stress.	WRKY DNA-binding protein 25 (WRKY25); CONTAINS InterPro DOMAIN/s: DNA-binding WRKY (InterPro:IPR003657); BEST Arabidopsis thaliana protein match is: WRKY DNA-binding protein 26 (TAIR:AT5G07100.1); Has 5787 Blast hits to 3061 proteins in 192 species: Archae - 0; Bacteria - 0; Metazoa - 0; Fungi - 0; Plants - 5747; Viruses - 0; Other Eukaryotes - 40 (source: NCBI BLink).	AT2G30250	1.51994	0.970939	0.360749	0.899002	1.3346	0.568726	0.636254	-0.639251	0.208318	0.407167	1.7865	2.02787	-0.672951	0.345414		1	0.179673	0.791715	0.314849	0.00681351	1	0.714458	0.595064	0.912695	0.829594	0.00731048	0.00945783	0.511853	1.04349
protein_coding	plant U-box 24	Encodes a U-box-domain-containing E3 ubiquitin ligase that acts as a negative regulator of PAMP-triggered immunity.	plant U-box 24 (PUB24); FUNCTIONS IN: ubiquitin-protein ligase activity, binding; INVOLVED IN: respiratory burst involved in defense response, protein autoubiquitination, response to chitin, defense response; LOCATED IN: ubiquitin ligase complex; EXPRESSED IN: 21 plant structures; EXPRESSED DURING: 10 growth stages; CONTAINS InterPro DOMAIN/s: U box domain (InterPro:IPR003613), Armadillo-type fol…	AT3G11840	1.9546	1.14657	0.0322654	0.785086	1.16576	1.2663	0.500056	-0.60104	-0.100888	-0.258413	1.99791	2.00452	-0.223059	0.0188791		1	0.0551776	0.998448	0.350789	0.00675173	1	0.754862	0.630262	1	0.920243	0.00449275	0.0103555	1.10048	1.19414
protein_coding	Disease resistance protein (TIR-NBS class)	NA	Disease resistance protein (TIR-NBS class); FUNCTIONS IN: transmembrane receptor activity, ATP binding; INVOLVED IN: signal transduction, apoptosis, defense response, innate immune response; LOCATED IN: intrinsic to membrane, endomembrane system; EXPRESSED IN: 18 plant structures; EXPRESSED DURING: 11 growth stages; CONTAINS InterPro DOMAIN/s: NB-ARC (InterPro:IPR002182), Disease resistance prote…	AT3G04210	1.67757	0.46472	-0.188073	0.387641	0.837078	1.06613	-0.17732	-0.926073	-0.818546	-0.0624736	1.31764	1.14971	-0.157633	0.0741112		1	0.441646	0.836449	0.348262	0.00179598	1	0.926536	0.322599	0.0157545	0.885767	0.0284274	0.0782902	1.10068	1.14741
protein_coding	receptor lectin kinase	Induced in response to Salicylic acid.	receptor lectin kinase (RLK); FUNCTIONS IN: kinase activity; INVOLVED IN: response to salicylic acid stimulus; LOCATED IN: plasma membrane; EXPRESSED IN: 23 plant structures; EXPRESSED DURING: 13 growth stages; CONTAINS InterPro DOMAIN/s: Legume lectin, beta chain (InterPro:IPR001220), Protein kinase, ATP binding site (InterPro:IPR017441), Serine/threonine-protein kinase-like domain (InterPro:IPR…	AT2G37710	1.70847	1.01503	0.64188	0.659435	0.596607	0.357133	0.241386	-0.588888	-0.930406	-0.918378	1.29133	1.28281	-0.823407	-0.327499		1	0.0441152	0.358232	0.173671	0.044341	1	0.993123	0.576725	0.238198	0.000705388	0.0284804	0.0533037	0.301285	1.15606
protein_coding	Arabidopsis phospholipase-like protein (PEARLI 4) family	NA	Arabidopsis phospholipase-like protein (PEARLI 4) family; LOCATED IN: chloroplast; EXPRESSED IN: 21 plant structures; EXPRESSED DURING: 13 growth stages; CONTAINS InterPro DOMAIN/s: Phospholipase-like, arabidopsis (InterPro:IPR007942); BEST Arabidopsis thaliana protein match is: Arabidopsis phospholipase-like protein (PEARLI 4) family (TAIR:AT2G20950.1); Has 2973 Blast hits to 2400 proteins in 34…	AT4G38550	1.51135	1.12439	1.12187	0.4221	-0.0723929	0.543693	0.511387	0.168682	-0.444318	-0.676362	1.27491	1.21929	-0.781116	0.143959		0.847233	0.00163537	0.0345429	0.440647	0.853738	1	0.68763	0.797098	0.609359	0.0628721	0.0309667	0.0639801	0.372088	1.2113
protein_coding	phospholipase D gamma 1	phospholipase D (gamma)	phospholipase D gamma 1 (PLDGAMMA1); FUNCTIONS IN: phospholipase D activity, protein binding, phosphatidylinositol-4,5-bisphosphate binding; INVOLVED IN: defense response to bacterium, incompatible interaction, embryo development ending in seed dormancy; LOCATED IN: plasma membrane; EXPRESSED IN: 20 plant structures; EXPRESSED DURING: 12 growth stages; CONTAINS InterPro DOMAIN/s: C2 membrane targ…	AT4G11850	1.35328	1.42458	0.918464	1.02858	0.259222	0.701572	0.727902	0.102562	-0.145631	-0.565945	1.54407	1.91704	0.0512255	0.150663		1	0.00155778	0.137224	0.144352	0.674848	1	0.614121	0.902229	1	0.300349	0.0147619	0.0129572	1.17873	1.12993
protein_coding	PLAC8 family protein	NA	PLAC8 family protein; EXPRESSED IN: 22 plant structures; EXPRESSED DURING: 13 growth stages; CONTAINS InterPro DOMAIN/s: Protein of unknown function Cys-rich (InterPro:IPR006461); BEST Arabidopsis thaliana protein match is: PLAC8 family protein (TAIR:AT1G63830.3); Has 35333 Blast hits to 34131 proteins in 2444 species: Archae - 798; Bacteria - 22429; Metazoa - 974; Fungi - 991; Plants - 531; Viru…	AT4G23470	1.03085	1.20886	0.908332	0.886503	0.34555	0.791558	0.629721	0.398311	0.210687	-0.298686	1.71034	1.81167	-0.00708711	-0.133833		1	7.57e-05	0.108559	0.0607061	0.322518	1	0.570611	0.655518	0.654029	0.374557	0.00932168	0.0163664	1.0697	0.991079
protein_coding	syntaxin of plants 121	Encodes a syntaxin localized at the plasma membrane (SYR1, Syntaxin Related Protein 1, also known as SYP121, PENETRATION1/PEN1). SYR1/PEN1 is a member of the SNARE superfamily proteins. SNARE proteins are involved in cell signaling, vesicle traffic, growth and development. SYR1/PEN1 functions in positioning anchoring of the KAT1 K+ channel protein at the plasma membrane. Transcription is upregula…	syntaxin of plants 121 (SYP121); FUNCTIONS IN: protein anchor, SNAP receptor activity; INVOLVED IN: in 13 processes; LOCATED IN: SNARE complex, plasma membrane; EXPRESSED IN: 24 plant structures; EXPRESSED DURING: 13 growth stages; CONTAINS InterPro DOMAIN/s: Target SNARE coiled-coil domain (InterPro:IPR000727), t-SNARE (InterPro:IPR010989), Syntaxin/epimorphin, conserved site (InterPro:IPR006012…	AT3G11820	0.919179	1.14976	0.727695	1.0647	-0.115462	0.470456	0.421663	0.0234496	0.636937	-0.32292	2.0427	2.08842	-0.508525	0.217844		1	0.004402	0.238226	0.0183065	0.777776	1	0.806028	0.949168	0.170021	0.402777	0.00382888	0.00866129	0.800666	1.21778
protein_coding	xyloglucan endotransglucosylase/hydrolase 24	encodes a protein similar to endo xyloglucan transferase in sequence. It is also very similar to BRU1 in soybean, which is involved in brassinosteroid response.	xyloglucan endotransglucosylase/hydrolase 24 (XTH24); FUNCTIONS IN: hydrolase activity, acting on glycosyl bonds, xyloglucan:xyloglucosyl transferase activity; INVOLVED IN: aging, response to gibberellin stimulus, gibberellic acid mediated signaling pathway, response to brassinosteroid stimulus, plant-type cell wall loosening; LOCATED IN: cell wall, plasma membrane, cytoplasm, plant-type cell wal…	AT4G30270	1.01342	1.44695	-0.0347762	1.16152	1.01838	1.08047	1.68261	-0.0858141	0.654509	0.00666591	1.14549	1.58596	1.06915	-0.00991285		1	0.000135242	0.95374	0.00389982	0.00013724	1	0.00137118	0.893708	0.39578	0.757815	0.0882552	0.0347756	0.195024	1.0938
protein_coding	AP2/B3 transcription factor family protein	Encodes a member of the RAV transcription factor family that contains AP2 and B3 binding domains. Involved in the regulation of flowering under long days. Loss of function results in early flowering. Overexpression causes late flowering and repression of expression of FT. Novel transcriptional regulator involved in ethylene signaling. Promoter bound by EIN3. EDF1 in turn, binds to promoter elemen…	TEMPRANILLO 1 (TEM1); FUNCTIONS IN: DNA binding, sequence-specific DNA binding transcription factor activity; INVOLVED IN: photoperiodism, flowering, ethylene mediated signaling pathway; LOCATED IN: chloroplast; EXPRESSED IN: 22 plant structures; EXPRESSED DURING: 13 growth stages; CONTAINS InterPro DOMAIN/s: DNA-binding, integrase-type (InterPro:IPR016177), Transcriptional factor B3 (InterPro:IP…	AT1G25560	1.04362	1.44765	0.651182	0.417346	-0.00896616	0.998368	1.56774	0.398429	0.262336	-0.349814	1.50559	0.83224	-0.310489	0.887046		1	0.000337645	0.436672	0.855635	1	1	0.00249961	0.663183	1	0.704359	0.0164367	0.200164	1.05857	0.168948
protein_coding	Protein of unknown function (DUF3511)	NA	Protein of unknown function (DUF3511); FUNCTIONS IN: molecular_function unknown; INVOLVED IN: biological_process unknown; LOCATED IN: plasma membrane; EXPRESSED IN: 22 plant structures; EXPRESSED DURING: 13 growth stages; CONTAINS InterPro DOMAIN/s: Protein of unknown function DUF3511 (InterPro:IPR021899); BEST Arabidopsis thaliana protein match is: Protein of unknown function (DUF3511) (TAIR:AT2…	AT5G11970	0.979	1.21198	0.426728	0.505373	0.0362872	0.406136	1.3204	0.0319565	0.249787	-0.207341	1.19186	1.66169	0.238694	0.17867		1	0.00981084	0.603524	0.498475	0.993677	1	0.0489031	1	0.843843	0.800025	0.0442107	0.0232654	1.19324	1.17483
protein_coding	GATA transcription factor 5	Encodes GATA transcription factor gene GNC, involved in regulating carbon and nitrogen metabolism. Expression occurs in aerial tissue at an early stage of development and is inducible by nitrate.	GATA transcription factor 5 (GATA5); FUNCTIONS IN: sequence-specific DNA binding transcription factor activity; INVOLVED IN: regulation of transcription, DNA-dependent; EXPRESSED IN: 21 plant structures; EXPRESSED DURING: 13 growth stages; CONTAINS InterPro DOMAIN/s: Zinc finger, NHR/GATA-type (InterPro:IPR013088), Transcription factor, GATA, plant (InterPro:IPR016679), Zinc finger, GATA-type (In…	AT5G66320	0.578777	1.25175	0.380423	0.695209	0.0530808	1.20544	1.03413	0.0952103	0.520752	0.0667086	1.27592	1.60239	-0.491194	-0.0783058		1	0.00249633	0.639048	0.27452	1	1	0.110711	0.866577	0.465382	1	0.033548	0.0268757	0.803831	0.951704
protein_coding	Heat shock protein 70 (Hsp 70) family protein	NA	Heat shock protein 70 (Hsp 70) family protein; FUNCTIONS IN: ATP binding; INVOLVED IN: protein folding, response to karrikin, response to heat; LOCATED IN: cytosol; EXPRESSED IN: 24 plant structures; EXPRESSED DURING: 13 growth stages; CONTAINS InterPro DOMAIN/s: Heat shock protein 70, conserved site (InterPro:IPR018181), Heat shock protein Hsp70 (InterPro:IPR001023), Heat shock protein 70 (Inter…	AT3G09440	-0.210996	1.33388	0.1481	0.759692	0.0273984	0.392818	0.89156	-0.0364242	0.581554	-0.0411694	1.76318	0.759634	0.0900922	-0.63346		1	0.000218414	0.770502	0.20732	1	1	0.189008	0.933308	0.129664	1	0.00827509	0.265814	1.17544	0.483692
protein_coding	EF hand calcium-binding protein family	Encodes a protein with 40% similarity to calmodulin. Binds Ca(2+) and, as a consequence, undergoes conformational changes. CML24 expression occurs in all major organs, and transcript levels are increased from 2- to 15-fold in plants subjected to touch, darkness, heat, cold, hydrogen peroxide, abscisic acid (ABA), and indole-3-acetic acid. However, CML24 protein accumulation changes were not detec…	TOUCH 2 (TCH2); FUNCTIONS IN: calcium ion binding; INVOLVED IN: in 13 processes; LOCATED IN: plasma membrane, actin cytoskeleton; EXPRESSED IN: 34 plant structures; EXPRESSED DURING: 14 growth stages; CONTAINS InterPro DOMAIN/s: EF-Hand 1, calcium-binding site (InterPro:IPR018247), EF-HAND 2 (InterPro:IPR018249), EF-hand-like domain (InterPro:IPR011992), Calcium-binding EF-hand (InterPro:IPR00204…	AT5G37770	0.502779	-0.194539	0.163574	0.731125	1.28958	0.97695	-0.158738	0.692999	0.253821	0.410642	0.186082	1.38768	-0.678756	0.322634		1	0.945889	0.947685	0.471677	6.14e-05	1	1	0.328469	1	0.675287	1.1618	0.0425279	0.492795	1.13158
protein_coding	H/ACA ribonucleoprotein complex, subunit Gar1/Naf1 protein	NA	H/ACA ribonucleoprotein complex, subunit Gar1/Naf1 protein; FUNCTIONS IN: snoRNA binding, pseudouridine synthase activity, RNA binding; LOCATED IN: chloroplast thylakoid membrane, nucleolus; EXPRESSED IN: 23 plant structures; EXPRESSED DURING: 13 growth stages; CONTAINS InterPro DOMAIN/s: H/ACA ribonucleoprotein complex, subunit Gar1, eukaryote (InterPro:IPR021154), H/ACA ribonucleoprotein comple…	AT3G03920	0.250348	0.582895	0.315666	0.671689	0.599354	0.814901	0.371055	0.551474	0.198975	-0.135128	1.14519	0.92933	-0.0523304	-0.44041		1	0.121507	0.686366	0.219135	0.00974492	1	0.748976	0.294989	0.922282	1	0.0442741	0.136282	1.05625	1.12766
protein_coding	PYR1-like 4	Encodes a member of the PYR (pyrabactin resistance )/PYL(PYR1-like)/RCAR (regulatory components of ABA receptor) family proteins with 14 members. PYR/PYL/RCAR family proteins function as abscisic acid sensors. Mediate ABA-dependent regulation of protein phosphatase 2Cs ABI1 and ABI2.	PYR1-like 4 (PYL4); CONTAINS InterPro DOMAIN/s: Polyketide cyclase/dehydrase (InterPro:IPR019587); BEST Arabidopsis thaliana protein match is: Polyketide cyclase/dehydrase and lipid transport superfamily protein (TAIR:AT5G05440.1); Has 467 Blast hits to 463 proteins in 53 species: Archae - 0; Bacteria - 19; Metazoa - 0; Fungi - 2; Plants - 445; Viruses - 0; Other Eukaryotes - 1 (source: NCBI BLin…	AT2G38310	0.293275	0.418539	0.530187	0.598129	1.09536	0.676344	0.160524	0.561595	0.565054	0.647999	1.05896	1.45793	-0.315085	-0.289494		1	0.801194	0.567853	0.563148	0.00360072	1	1	0.465181	0.817586	0.113836	0.0599083	0.0355775	1.06146	1.15651
protein_coding	Phosphofructokinase family protein	NA	Phosphofructokinase family protein; FUNCTIONS IN: diphosphate-fructose-6-phosphate 1-phosphotransferase activity; INVOLVED IN: response to cadmium ion, glycolysis, photosynthesis; LOCATED IN: pyrophosphate-dependent phosphofructokinase complex, beta-subunit complex, cell wall, membrane; EXPRESSED IN: 24 plant structures; EXPRESSED DURING: 14 growth stages; CONTAINS InterPro DOMAIN/s: Pyrophosphat…	AT1G12000	-0.0338803	0.65971	0.480927	1.17209	1.17919	0.342069	0.336872	0.171725	0.720648	0.688621	1.13012	1.37589	-0.0557373	-0.114451		1	0.24893	0.652948	0.0183456	0.000869385	1	0.868673	0.998122	0.0907871	0.065545	0.0561061	0.047574	1.02991	0.978487
protein_coding	GTP binding Elongation factor Tu family protein	NA	GTP binding Elongation factor Tu family protein; FUNCTIONS IN: translation elongation factor activity, cobalt ion binding, zinc ion binding, ATP binding; INVOLVED IN: response to cadmium ion; LOCATED IN: mitochondrion, cell wall; EXPRESSED IN: 27 plant structures; EXPRESSED DURING: 13 growth stages; CONTAINS InterPro DOMAIN/s: Translation elongation factor EFTu/EF1A, bacterial/organelle (InterPro…	AT4G02930	-0.164598	0.632081	0.00864269	1.1811	0.998346	-0.00624077	0.107827	0.149805	-0.111177	0.229299	1.28216	1.34601	0.237258	-0.156299		1	0.370878	1	0.0236315	0.00187484	1	0.985293	0.946242	0.993307	0.651887	0.0307426	0.0467969	1.18755	0.991666
protein_coding	histone deacetylase 3	Encodes a histone deacetylase. Controls the development of adaxial/abaxial leaf polarity. Two lines with RNAi-directed against this gene show reduced Agrobacterium-mediated DNA transformation of the roots.	histone deacetylase 3 (HDA3); CONTAINS InterPro DOMAIN/s: Zinc finger, C2H2-type (InterPro:IPR007087), Nucleoplasmin (InterPro:IPR004301); BEST Arabidopsis thaliana protein match is: histone deacetylase 2B (TAIR:AT5G22650.1).	AT3G44750	-0.886392	0.0374648	0.504534	1.58725	1.6982	-0.261548	-0.374147	0.303589	0.32956	0.235384	1.33438	1.24601	0.110632	-0.0695026		1	0.983366	0.451887	0.000583672	2.02e-10	1	0.898969	0.878231	0.71701	0.584997	0.0290021	0.065343	1.17024	1.04438
protein_coding	phosphoribosylaminoimidazole carboxylase, putative / AIR carboxylase, putative	NA	phosphoribosylaminoimidazole carboxylase, putative / AIR carboxylase, putative; FUNCTIONS IN: phosphoribosylaminoimidazole carboxylase activity, catalytic activity, ATP binding; INVOLVED IN: 'de novo' IMP biosynthetic process, pollen development; LOCATED IN: chloroplast; CONTAINS InterPro DOMAIN/s: Phosphoribosylaminoimidazole carboxylase (InterPro:IPR016301), PreATP-grasp-like fold (InterPro:IPR…	AT2G37690	-0.881914	0.464136	0.692952	1.00986	1.46199	-0.224851	-0.289631	0.745889	-0.335572	0.0675645	1.27253	1.32799	-0.108057	-0.269203		1	0.668628	0.40964	0.172036	0.00140952	1	0.977873	0.38889	0.889973	1	0.0360861	0.0482585	1.06443	1.02471
protein_coding	UDP-glucosyltransferase 74F2	Induced by Salicylic acid, virus, fungus and bacteria.Involved in the tryptophan synthesis pathway. Independent of NPR1 for their induction by salicylic acid. UGT74F1 transfers UDP:glucose to salicylic acid (forming a glucoside (SAG) and a glucose ester (SGE)), benzoic acid, and athranilate in vitro. UGT74F2 shows a weak ability to catalyze the formation of the p-aminobenzoate-glucose ester in vi…	UDP-glucosyltransferase 74F2 (UGT74F2); CONTAINS InterPro DOMAIN/s: UDP-glucuronosyl/UDP-glucosyltransferase (InterPro:IPR002213); BEST Arabidopsis thaliana protein match is: UDP-glycosyltransferase 74 F1 (TAIR:AT2G43840.1); Has 8409 Blast hits to 8329 proteins in 546 species: Archae - 0; Bacteria - 818; Metazoa - 2323; Fungi - 31; Plants - 5038; Viruses - 125; Other Eukaryotes - 74 (source: NCBI…	AT2G43820	0.852534	0.521533	0.452399	1.19199	1.55248	-0.289747	0.254851	-0.355921	0.906425	1.82362	1.16453	0.0114914	0.529786	0.509895		1	0.601273	0.659545	0.152884	0.000703106	1	0.95346	0.871955	0.190424	0.0107173	0.0442814	1.29337	0.659581	0.548649
protein_coding	HCO3- transporter family	NA	HCO3- transporter family; FUNCTIONS IN: anion exchanger activity; INVOLVED IN: anion transport; LOCATED IN: plasma membrane; EXPRESSED IN: 23 plant structures; EXPRESSED DURING: 13 growth stages; CONTAINS InterPro DOMAIN/s: Bicarbonate transporter, eukaryotic (InterPro:IPR003020), Bicarbonate transporter, C-terminal (InterPro:IPR011531); BEST Arabidopsis thaliana protein match is: HCO3- transport…	AT3G06450	-0.633869	0.485709	0.192741	0.874263	1.25259	-0.310349	0.245103	-0.206206	0.692441	1.59671	1.01012	1.44376	-0.299836	-0.316487		1	0.533241	0.791715	0.208693	0.00444126	1	0.877076	1	0.276602	0.0127473	0.071422	0.0374016	1.03988	1.03158
protein_coding	Plasma-membrane choline transporter family protein	NA	Plasma-membrane choline transporter family protein; INVOLVED IN: biological_process unknown; EXPRESSED IN: 23 plant structures; EXPRESSED DURING: 15 growth stages; CONTAINS InterPro DOMAIN/s: Protein of unknown function DUF580 (InterPro:IPR007603); BEST Arabidopsis thaliana protein match is: Plasma-membrane choline transporter family protein (TAIR:AT5G13760.1); Has 30201 Blast hits to 17322 prote…	AT1G25500	0.0334306	0.602258	-0.286455	0.399693	1.87309	-0.309296	0.464525	-0.0638437	0.604742	2.17305	0.94272	1.34671	1.52881	0.287828		1	0.561968	0.958306	0.848067	0.00512022	1	0.88361	1	0.526916	0.000461182	0.131448	0.0473292	0.101837	1.02406
protein_coding	SecY protein transport family protein	NA	SecY protein transport family protein; FUNCTIONS IN: P-P-bond-hydrolysis-driven protein transmembrane transporter activity; INVOLVED IN: protein secretion, protein transport; LOCATED IN: mitochondrion, plasma membrane, membrane; EXPRESSED IN: 24 plant structures; EXPRESSED DURING: 15 growth stages; CONTAINS InterPro DOMAIN/s: SecY protein (InterPro:IPR002208), Translocon Sec61/SecY, plug domain (…	AT1G29310	-0.0357	1.07741	0.926809	1.27603	1.24579	-0.0991744	0.608632	0.544723	0.563775	0.408281	1.25746	1.42606	0.281251	-0.333348		1	0.0540715	0.116358	0.0151559	6.76e-05	1	0.632643	0.535041	0.239997	0.470742	0.0338252	0.0413424	1.1465	1.11389
protein_coding	Dihydrolipoamide succinyltransferase	NA	Dihydrolipoamide succinyltransferase; FUNCTIONS IN: zinc ion binding, acyltransferase activity; INVOLVED IN: tricarboxylic acid cycle, metabolic process; LOCATED IN: mitochondrion, membrane; EXPRESSED IN: 25 plant structures; EXPRESSED DURING: 15 growth stages; CONTAINS InterPro DOMAIN/s: 2-oxo acid dehydrogenase, lipoyl-binding site (InterPro:IPR003016), Dihydrolipoamide succinyltransferase (Int…	AT4G26910	0.19862	0.873096	0.609315	1.37579	0.980359	0.064728	0.284435	-0.00369558	1.04299	0.545668	1.19459	1.37516	0.231577	0.017788		1	0.0542889	0.254508	0.00935455	0.00229202	1	0.938225	0.995669	0.0132188	0.490708	0.0391728	0.042858	1.18485	1.13982
protein_coding	SCARECROW-like 13	Encodes a scarecrow-like protein (SCL13). Member of GRAS gene family.	SCARECROW-like 13 (SCL13); CONTAINS InterPro DOMAIN/s: Transcription factor GRAS (InterPro:IPR005202); BEST Arabidopsis thaliana protein match is: scarecrow-like 5 (TAIR:AT1G50600.1); Has 2512 Blast hits to 2467 proteins in 302 species: Archae - 0; Bacteria - 4; Metazoa - 0; Fungi - 0; Plants - 2508; Viruses - 0; Other Eukaryotes - 0 (source: NCBI BLink).	AT4G17230	0.676125	0.981787	0.524778	0.644452	1.1575	-0.128117	0.719975	-0.0963831	0.516093	0.538688	1.38536	1.45518	1.49705	0.580439		1	0.0122336	0.388689	0.232658	2.55e-05	1	0.612775	0.913075	0.210102	0.337052	0.0251978	0.0373301	0.103303	0.646849
protein_coding	Major facilitator superfamily protein	Encodes a protein with high affinity, hexose-specific/H+ symporter activity. The activity of the transporter appears to be negatively regulated by phosphorylation. Importantly, microarray analysis, as well as the study of the expression of this gene in mutants involved in programmed cell death (PCD) demonstrated a tight correlation between this gene's expression and PCD.	MSS1; FUNCTIONS IN: carbohydrate transmembrane transporter activity, high-affinity hydrogen:glucose symporter activity, sugar:hydrogen symporter activity, hexose:hydrogen symporter activity; INVOLVED IN: response to salt stress, apoptosis, phosphorylation; LOCATED IN: plasma membrane, membrane; EXPRESSED IN: 22 plant structures; EXPRESSED DURING: 10 growth stages; CONTAINS InterPro DOMAIN/s: Suga…	AT5G26340	0.631462	0.562381	0.287141	0.929108	1.07609	0.133922	0.250472	-0.385545	0.40996	0.616395	1.32507	1.4934	2.51017	0.0104383		1	0.139599	0.595967	0.0377292	6.52e-07	1	0.881686	0.620404	0.215843	0.0816208	0.0284339	0.0343767	0.0376807	1.05007
protein_coding	proteasome activating protein 200	Encodes a protein that interacts with the 26S proteasome. Mutants are phenotypically indistinguishable from wild type plants under a variety of growth conditions. Protein levels increase upon exposure of seedlings to MG132, a specific, potent, reversible, and cell-permeable proteasome inhibitor.	proteasome activating protein 200 (PA200); FUNCTIONS IN: binding; LOCATED IN: cellular_component unknown; EXPRESSED IN: 24 plant structures; EXPRESSED DURING: 13 growth stages; CONTAINS InterPro DOMAIN/s: Protein of unknown function DUF3437 (InterPro:IPR021843), Armadillo-type fold (InterPro:IPR016024); Has 512 Blast hits to 355 proteins in 156 species: Archae - 0; Bacteria - 0; Metazoa - 127; Fu…	AT3G13330	0.0134241	0.546369	-0.0422613	0.671757	0.559078	-0.311983	0.188473	-0.439295	1.16032	0.707096	1.2806	1.37168	0.0852603	-0.427721		1	0.257331	0.962754	0.293152	0.157495	1	0.926215	0.555136	0.00306753	0.197442	0.0292222	0.0433968	1.1421	1.08033
protein_coding	signal peptide peptidase	homologous to Signal Peptide Peptidases (SPP), required for pollen development and pollen germination. No homozygotes could be recovered from a T-DNA insertion mutant.	signal peptide peptidase (SPP); FUNCTIONS IN: aspartic-type endopeptidase activity; INVOLVED IN: pollen germination, pollen development; LOCATED IN: endoplasmic reticulum, endoplasmic reticulum membrane; EXPRESSED IN: 28 plant structures; EXPRESSED DURING: 16 growth stages; CONTAINS InterPro DOMAIN/s: Peptidase A22, presenilin signal peptide (InterPro:IPR006639), Peptidase A22B, signal peptide pe…	AT2G03120	0.0419123	0.721163	-0.411372	1.11671	0.82527	0.330684	0.9651	-0.347244	0.726974	0.384145	1.05265	1.33729	0.0557845	-0.243994		1	0.103786	0.720032	0.0166252	0.00360151	1	0.0867553	0.561866	0.102946	0.268135	0.061245	0.0471122	1.15586	1.14279
protein_coding	Ypt/Rab-GAP domain of gyp1p superfamily protein	NA	Ypt/Rab-GAP domain of gyp1p superfamily protein; FUNCTIONS IN: RAB GTPase activator activity; INVOLVED IN: regulation of Rab GTPase activity; LOCATED IN: intracellular; EXPRESSED IN: 23 plant structures; EXPRESSED DURING: 15 growth stages; CONTAINS InterPro DOMAIN/s: RabGAP/TBC (InterPro:IPR000195); BEST Arabidopsis thaliana protein match is: Ypt/Rab-GAP domain of gyp1p superfamily protein (TAIR:…	AT4G29950	0.320236	0.688002	-0.44152	0.534077	1.4008	0.346895	1.01921	-0.0315545	0.495212	0.931835	1.17169	1.58545	0.091501	0.00274512		1	0.246342	0.706422	0.539117	0.00218288	1	0.214408	0.9964	0.479266	0.0887806	0.0463954	0.0272392	1.16096	1.2046
protein_coding	trehalose phosphatase/synthase 11	Encodes an enzyme putatively involved in trehalose biosynthesis. The protein has a trehalose synthase (TPS)-like domain that may or may not be active as well as a trehalose phosphatase (TPP)-like domain.	trehalose phosphatase/synthase 11 (TPS11); FUNCTIONS IN: transferase activity, transferring glycosyl groups; INVOLVED IN: trehalose biosynthetic process, metabolic process; LOCATED IN: mitochondrion; EXPRESSED IN: 27 plant structures; EXPRESSED DURING: 15 growth stages; CONTAINS InterPro DOMAIN/s: HAD-superfamily hydrolase, subfamily IIB (InterPro:IPR006379), Glycosyl transferase, family 20 (Inte…	AT2G18700	0.0994525	0.443181	-0.171822	0.821579	1.313	0.609436	0.893568	-0.0523117	1.01498	1.55076	1.09326	1.43839	-0.00760343	0.453104		1	0.390635	0.919668	0.178677	0.000174833	1	0.262994	0.954466	0.0363642	1.44e-05	0.0548228	0.0390143	1.09484	0.741862
protein_coding	NA	NA	unknown protein; BEST Arabidopsis thaliana protein match is: unknown protein (TAIR:AT4G31510.1); Has 219 Blast hits to 219 proteins in 33 species: Archae - 0; Bacteria - 0; Metazoa - 16; Fungi - 2; Plants - 184; Viruses - 0; Other Eukaryotes - 17 (source: NCBI BLink).	AT2G24550	0.294016	0.189039	-0.416289	0.432237	1.53986	0.4064	0.827329	0.0768998	1.01244	1.71897	1.57822	1.43121	0.602807	0.695841		1	0.802459	0.583919	0.666437	0.00244497	1	0.474234	0.90259	0.138423	0.000402277	0.0131935	0.0390458	0.461692	0.295408
protein_coding	MAC/Perforin domain-containing protein	Encodes a protein containing a domain with significant homology to the MACPF (membrane attack complex and perforin) domain of complements and perforin proteins that are involved in innate immunity in animals. Transgenic <i>cad1-1</i> mutant plants show lesions seen in the hypersensitive response, as well as a spontaneous activation of expression of pathogenesis-related genes and leading to a 32-f…	constitutively activated cell death 1 (CAD1); CONTAINS InterPro DOMAIN/s: Membrane attack complex component/perforin (MACPF) domain (InterPro:IPR020864); BEST Arabidopsis thaliana protein match is: MAC/Perforin domain-containing protein (TAIR:AT4G24290.2); Has 226 Blast hits to 225 proteins in 30 species: Archae - 0; Bacteria - 6; Metazoa - 14; Fungi - 0; Plants - 200; Viruses - 0; Other Eukaryot…	AT1G29690	0.00471288	0.643183	0.0710311	0.662886	2.22611	-0.925683	0.59439	-0.228218	0.627063	0.792938	0.957893	1.43279	-0.138891	-0.16321		1	0.719379	0.890133	0.572138	0.000146468	1	0.842736	0.909579	0.47318	0.534162	0.0886655	0.040628	1.07942	1.01912
protein_coding	Aluminium induced protein with YGL and LRDR motifs	NA	Aluminium induced protein with YGL and LRDR motifs; FUNCTIONS IN: molecular_function unknown; INVOLVED IN: biological_process unknown; LOCATED IN: cytosol, nucleus, plasma membrane; EXPRESSED IN: 25 plant structures; EXPRESSED DURING: 14 growth stages; BEST Arabidopsis thaliana protein match is: Aluminium induced protein with YGL and LRDR motifs (TAIR:AT3G15450.1); Has 30201 Blast hits to 17322 p…	AT4G27450	0.633392	0.0950025	-0.192439	0.27982	1.28001	0.737756	0.0197991	0.0810739	0.988151	3.06316	1.48011	1.33639	-0.22894	-0.197084		1	0.941807	0.846707	0.898006	0.000818875	1	1	0.91203	0.276438	2.69e-20	0.017985	0.0521763	1.10077	1.12387
protein_coding	oligopeptide transporter 4	oligopeptide transporter	oligopeptide transporter 4 (OPT4); CONTAINS InterPro DOMAIN/s: Tetrapeptide transporter, OPT1/isp4 (InterPro:IPR004648), Oligopeptide transporter OPT superfamily (InterPro:IPR004813); BEST Arabidopsis thaliana protein match is: oligopeptide transporter 2 (TAIR:AT1G09930.1); Has 1807 Blast hits to 1807 proteins in 277 species: Archae - 0; Bacteria - 0; Metazoa - 736; Fungi - 347; Plants - 385; Vir…	AT5G64410	-0.111118	-0.377737	0.0303835	0.542307	0.388478	-0.248403	-0.491741	-0.146651	1.15149	1.38799	0.810459	2.55258	-0.752348	-0.503397		1	0.587217	0.999046	0.538108	0.271999	1	0.721634	1	0.0316702	0.000132092	0.153251	0.00330729	0.369758	1.15685
protein_coding	Leucine-rich repeat transmembrane protein kinase	NA	Leucine-rich repeat transmembrane protein kinase; FUNCTIONS IN: protein serine/threonine kinase activity, protein kinase activity, ATP binding; INVOLVED IN: protein amino acid phosphorylation; LOCATED IN: plasma membrane; EXPRESSED IN: callus; CONTAINS InterPro DOMAIN/s: Serine/threonine-protein kinase domain (InterPro:IPR002290), Leucine-rich repeat (InterPro:IPR001611), Serine-threonine/tyrosin…	AT1G56140	0.517932	-0.475083	-0.412417	1.57655	1.24799	-0.18363	-0.193504	0.078603	2.11238	1.95771	1.98066	2.4844	-0.337752	0.169615		1	0.915779	0.828975	0.166116	0.118955	1	0.967654	0.69438	0.0281685	0.00335741	0.00443284	0.003925	1.0411	1.18371
protein_coding	myo-inositol polyphosphate 5-phosphatase 2	Encodes an inositol polyphosphate 5-phosphatase that appears to have Type I activity. It can dephosphorylate IP3(inositol(1,4,5)P3) and IP4 (inositol(1,3,4,5)P4), but it does not appear to be active against phosphatidylinositol 4,5 bisphosphate. Overexpression of this gene renders plants insensitive to ABA in germination and growth assays.	INOSITOL(1,4,5)P3 5-PHOSPHATASE II (IP5PII); CONTAINS InterPro DOMAIN/s: Inositol polyphosphate related phosphatase (InterPro:IPR000300), Endonuclease/exonuclease/phosphatase (InterPro:IPR005135); BEST Arabidopsis thaliana protein match is: DNAse I-like superfamily protein (TAIR:AT1G71710.2); Has 2627 Blast hits to 2054 proteins in 224 species: Archae - 0; Bacteria - 0; Metazoa - 957; Fungi - 640…	AT4G18010	0.293782	0.0258564	-0.942553	1.58907	0.533517	0.0962706	0.201848	-1.07964	2.55174	2.05115	1.11824	1.8316	0.506539	0.318816		1	1	0.56829	0.440053	0.712514	1	1	0.113673	0.0279067	0.00591408	0.0804403	0.0158627	0.715451	1.07986
protein_coding	beta-galactosidase 4	NA	beta-galactosidase 4 (BGAL4); FUNCTIONS IN: beta-galactosidase activity; INVOLVED IN: lactose catabolic process, using glucoside 3-dehydrogenase, carbohydrate metabolic process, lactose catabolic process via UDP-galactose, lactose catabolic process; LOCATED IN: endomembrane system; EXPRESSED IN: 25 plant structures; EXPRESSED DURING: 12 growth stages; CONTAINS InterPro DOMAIN/s: Glycoside hydrola…	AT5G56870	0.812939	-0.0152719	0.363033	1.12675	1.57956	1.21334	0.666186	0.612511	2.08894	2.84204	1.7151	2.04047	-0.786814	-0.0575994		1	1	0.702828	0.208314	0.00414993	1	0.64391	0.427887	0.000407863	1.87e-13	0.00937847	0.00945619	0.331578	1.1045
protein_coding	Galactose oxidase/kelch repeat superfamily protein	NA	Galactose oxidase/kelch repeat superfamily protein; CONTAINS InterPro DOMAIN/s: Galactose oxidase/kelch, beta-propeller (InterPro:IPR011043), Kelch repeat type 1 (InterPro:IPR006652), Kelch related (InterPro:IPR013089), Kelch-type beta propeller (InterPro:IPR015915); BEST Arabidopsis thaliana protein match is: Galactose oxidase/kelch repeat superfamily protein (TAIR:AT1G80440.1); Has 1241 Blast h…	AT1G15670	1.51076	1.22828	0.855534	0.841157	0.999437	0.995069	0.898001	0.575248	1.96876	2.14698	2.50018	2.62721	0.4224	0.170568		1	0.387852	0.34282	0.792772	0.29577	1	0.782084	0.568013	0.0521725	0.000879006	0.00118095	0.00308	0.820548	1.07957
protein_coding	PLAC8 family protein	NA	PLAC8 family protein; FUNCTIONS IN: molecular_function unknown; INVOLVED IN: response to oxidative stress; LOCATED IN: plasma membrane; EXPRESSED IN: 10 plant structures; EXPRESSED DURING: 6 growth stages; CONTAINS InterPro DOMAIN/s: Protein of unknown function Cys-rich (InterPro:IPR006461); BEST Arabidopsis thaliana protein match is: PLAC8 family protein (TAIR:AT3G18450.1); Has 632 Blast hits to…	AT1G52200	0.881088	0.802746	0.487306	0.764597	1.31598	0.552666	1.00482	0.00739065	1.319	1.78089	2.51626	2.58276	-0.730514	0.0590413		1	0.281071	0.476907	0.563592	0.00720086	1	0.447017	0.908551	0.111526	0.00297243	0.00107767	0.00316575	0.391015	1.17513
protein_coding	ortholog of sugar beet HS1 PRO-1 2	NA	ortholog of sugar beet HS1 PRO-1 2 (HSPRO2); CONTAINS InterPro DOMAIN/s: Hs1pro-1, C-terminal (InterPro:IPR009743), Hs1pro-1, N-terminal (InterPro:IPR009869); BEST Arabidopsis thaliana protein match is: Hs1pro-1 protein (TAIR:AT3G55840.1); Has 71 Blast hits to 71 proteins in 18 species: Archae - 0; Bacteria - 0; Metazoa - 0; Fungi - 0; Plants - 60; Viruses - 0; Other Eukaryotes - 11 (source: NCBI…	AT2G40000	0.394572	0.112517	1.38331	1.02288	0.646043	0.644871	-0.151038	0.552401	1.66045	1.88673	3.08378	2.54917	-0.18309	1.59301		1	1	0.0154654	0.305211	0.342853	1	0.984867	0.539427	0.0162462	0.00331331	0.000177778	0.00325789	1.08642	0.0173158
protein_coding	receptor-like protein kinase-related family protein	NA	receptor-like protein kinase-related family protein; FUNCTIONS IN: molecular_function unknown; INVOLVED IN: response to karrikin; LOCATED IN: endomembrane system; EXPRESSED IN: 21 plant structures; EXPRESSED DURING: 13 growth stages; CONTAINS InterPro DOMAIN/s: Protein of unknown function DUF26 (InterPro:IPR002902); BEST Arabidopsis thaliana protein match is: Receptor-like protein kinase-related …	AT5G48540	1.27413	0.870525	0.606756	0.0357659	0.994652	-0.0487553	0.498188	0.790414	2.16978	2.2785	1.48723	1.70664	-1.51484	-0.492067		0.999532	0.211195	0.602362	1	0.0227074	1	0.784599	0.714535	0.000100697	1.32e-07	0.0187363	0.0210803	0.0495957	1.16093
protein_coding	D-3-phosphoglycerate dehydrogenase	encodes a 3-Phosphoglycerate dehydrogenase	D-3-phosphoglycerate dehydrogenase; CONTAINS InterPro DOMAIN/s: D-3-phosphoglycerate dehydrogenase (InterPro:IPR006236), D-isomer specific 2-hydroxyacid dehydrogenase, catalytic domain (InterPro:IPR006139), D-isomer specific 2-hydroxyacid dehydrogenase, NAD-binding (InterPro:IPR006140), D-3-phosphogylcerate Dehydrogenase (InterPro:IPR015508), NAD(P)-binding domain (InterPro:IPR016040), Amino acid…	AT1G17745	-0.134039	0.660297	-0.0793927	0.387819	1.12646	-0.0281531	0.159894	-0.235983	0.981789	2.33598	1.4845	1.67958	0.954275	0.127312		1	0.364779	0.88887	0.469821	0.000259475	1	1	0.764424	0.0102681	9.05e-08	0.017804	0.0223347	0.235304	1.1899
protein_coding	WRKY DNA-binding protein 60	Pathogen-induced transcription factor. Forms protein complexes with itself and with WRKY40. Coexpression with WRKY18 or WRKY40 made plants more susceptible to both P. syringae and B. cinerea. WRKY18, WRKY40, and WRKY60 have partially redundant roles in response to the hemibiotrophic bacterial pathogen Pseudomonas syringae and the necrotrophic fungal pathogen Botrytis cinerea, with WRKY18 playing …	WRKY DNA-binding protein 60 (WRKY60); CONTAINS InterPro DOMAIN/s: DNA-binding WRKY (InterPro:IPR003657); BEST Arabidopsis thaliana protein match is: WRKY DNA-binding protein 18 (TAIR:AT4G31800.1); Has 3263 Blast hits to 2826 proteins in 197 species: Archae - 14; Bacteria - 0; Metazoa - 0; Fungi - 0; Plants - 3232; Viruses - 0; Other Eukaryotes - 17 (source: NCBI BLink).	AT2G25000	0.375389	0.635329	0.965019	0.231228	1.09728	-0.0630358	0.256937	0.361141	0.503156	1.97271	2.10675	2.8376	-0.661281	-0.0551875		1	0.573582	0.225879	0.887128	0.153122	1	1	0.691024	0.477116	0.00172257	0.00296933	0.00160544	0.452444	1.09998
protein_coding	prenylcysteine methylesterase	Encodes a protein with prenylcysteine methylesterase activity.	prenylcysteine methylesterase (PCME); CONTAINS InterPro DOMAIN/s: Carboxylesterase type B, active site (InterPro:IPR019826), Carboxylesterase, type B (InterPro:IPR002018); BEST Arabidopsis thaliana protein match is: alpha/beta-Hydrolases superfamily protein (TAIR:AT3G02410.1); Has 35333 Blast hits to 34131 proteins in 2444 species: Archae - 798; Bacteria - 22429; Metazoa - 974; Fungi - 991; Plant…	AT5G15860	0.613525	-0.224113	1.28643	-0.0412779	1.27292	0.703863	-0.608506	0.12519	1.36249	2.32854	1.35506	1.66144	-0.798816	-0.194097		1	0.857171	0.0234376	1	0.00779768	1	0.641169	1	0.00500093	3.04e-09	0.024709	0.0230396	0.365463	0.987867
protein_coding	with no lysine (K) kinase 4	Encodes a member of the WNK family (9 members in all) of protein kinases, the structural design of which is clearly distinct from those of other known protein kinases, such as receptor-like kinases and mitogen-activated protein kinases. Its transcription is under the control of circadian rhythms.	with no lysine (K) kinase 4 (WNK4); FUNCTIONS IN: protein kinase activity, kinase activity; INVOLVED IN: protein amino acid phosphorylation; LOCATED IN: nucleus, cytoplasm; EXPRESSED IN: 22 plant structures; EXPRESSED DURING: 13 growth stages; CONTAINS InterPro DOMAIN/s: Protein kinase, catalytic domain (InterPro:IPR000719), Serine/threonine-protein kinase-like domain (InterPro:IPR017442), Protei…	AT5G58350	0.452381	0.123368	0.913539	1.05352	1.40663	-0.779179	-0.259695	0.493415	1.17637	1.50606	1.51974	1.43681	0.875315	0.0017343		1	0.89516	0.169922	0.263345	0.00613268	1	0.941739	0.406607	0.133606	0.0155788	0.0158832	0.039168	0.24382	1.15309
protein_coding	Calcium-binding EF-hand family protein	NA	Calcium-binding EF-hand family protein; FUNCTIONS IN: calcium ion binding; INVOLVED IN: biological_process unknown; LOCATED IN: cellular_component unknown; EXPRESSED IN: 14 plant structures; EXPRESSED DURING: 8 growth stages; CONTAINS InterPro DOMAIN/s: EF-Hand 1, calcium-binding site (InterPro:IPR018247), EF-HAND 2 (InterPro:IPR018249), EF-hand-like domain (InterPro:IPR011992), Calcium-binding E…	AT1G21550	0.565596	0.167479	0.853111	1.027	1.75873	-0.572298	-0.0479196	-0.017982	1.17481	1.31905	0.990219	1.80848	0.319588	0.0924448		1	0.954672	0.218136	0.291773	0.000696665	1	1	0.921814	0.0848501	0.0621534	0.111152	0.0158491	1.04344	1.19304
protein_coding	protein kinase 2A	Encodes protein kinase APK2a.	protein kinase 2A (APK2A); FUNCTIONS IN: protein serine/threonine kinase activity, protein kinase activity, kinase activity, ATP binding; INVOLVED IN: protein amino acid phosphorylation; LOCATED IN: chloroplast; EXPRESSED IN: 17 plant structures; EXPRESSED DURING: 9 growth stages; CONTAINS InterPro DOMAIN/s: Protein kinase, ATP binding site (InterPro:IPR017441), Protein kinase, catalytic domain (…	AT1G14370	0.967281	0.280018	0.555574	1.77726	1.93754	0.497304	0.149551	-0.250174	1.56585	1.30316	1.55869	1.81944	0.143247	0.43756		1	0.886874	0.588411	0.0469767	9.46e-07	1	1	0.819532	0.0367578	0.0441462	0.0134355	0.0157877	1.20405	0.974841
protein_coding	glutamine synthase clone R1	encodes a cytosolic glutamine synthetase, the enzyme has high affinity with substrate ammonium	glutamine synthase clone R1 (GSR 1); FUNCTIONS IN: glutamate-ammonia ligase activity, copper ion binding; INVOLVED IN: nitrate assimilation, response to fructose stimulus, response to light stimulus, response to sucrose stimulus, response to glucose stimulus; LOCATED IN: cytosol, cytosolic ribosome, cell wall, plasma membrane; EXPRESSED IN: 24 plant structures; EXPRESSED DURING: 14 growth stages;…	AT5G37600	0.354991	0.238386	0.586149	1.33661	1.16494	0.272628	-0.0582773	0.0729828	1.00819	1.1635	1.34529	1.7166	-0.718797	-0.124841		1	0.61956	0.345543	0.000100744	3.86e-05	1	1	0.994974	2.32e-06	0.00347462	0.0255714	0.019896	0.412798	1.00399
protein_coding	DCD (Development and Cell Death) domain protein	NA	DCD (Development and Cell Death) domain protein; CONTAINS InterPro DOMAIN/s: Development/cell death domain (InterPro:IPR013989), Kelch related (InterPro:IPR013089); BEST Arabidopsis thaliana protein match is: DCD (Development and Cell Death) domain protein (TAIR:AT3G27090.1); Has 30201 Blast hits to 17322 proteins in 780 species: Archae - 12; Bacteria - 1396; Metazoa - 17338; Fungi - 3422; Plants…	AT5G42050	0.677962	0.384703	0.957717	1.26476	1.12699	0.108453	0.22659	0.0717532	1.32364	0.966417	1.19282	1.53352	0.104835	0.0912202		1	0.347552	0.186721	0.00652801	3.61e-05	1	0.889582	0.872733	2.79e-05	0.00146682	0.0429506	0.0307539	1.20064	1.16763
protein_coding	NA	NA	CONTAINS InterPro DOMAIN/s: LPS-induced tumor necrosis factor alpha factor (InterPro:IPR006629); Has 30201 Blast hits to 17322 proteins in 780 species: Archae - 12; Bacteria - 1396; Metazoa - 17338; Fungi - 3422; Plants - 5037; Viruses - 0; Other Eukaryotes - 2996 (source: NCBI BLink).	AT5G13190	0.914228	-0.0654713	0.299052	0.770172	1.18727	0.433395	-0.0966743	-0.0976637	0.895885	1.23956	1.34297	1.77498	-0.148898	-0.0447444		1	1	0.663954	0.114871	3.64e-07	1	0.976883	0.84747	0.0119298	1.14e-05	0.0262685	0.0174014	1.08763	0.959842
protein_coding	long-chain acyl-CoA synthetase 7	Encode peroxisomal long-chain acyl-CoA synthetase. Activates fatty acids for further metabolism. Interacts with PEX5.	long-chain acyl-CoA synthetase 7 (LACS7); FUNCTIONS IN: protein binding, long-chain fatty acid-CoA ligase activity; INVOLVED IN: response to salt stress, long-chain fatty acid metabolic process, response to ozone; LOCATED IN: peroxisome; EXPRESSED IN: 25 plant structures; EXPRESSED DURING: 15 growth stages; CONTAINS InterPro DOMAIN/s: AMP-binding, conserved site (InterPro:IPR020845), AMP-dependen…	AT5G27600	0.961617	0.0173658	-0.0995253	1.1081	1.44459	0.847301	0.00551516	-0.169559	1.35703	1.64676	1.23364	1.14621	0.964171	-0.013674		1	1	0.990382	0.247939	0.00734655	1	1	0.833518	0.0510644	0.00234998	0.0343521	0.0758195	0.22324	0.95165
protein_coding	SOUL heme-binding family protein	NA	SOUL-1; FUNCTIONS IN: binding; INVOLVED IN: N-terminal protein myristoylation, red or far-red light signaling pathway; LOCATED IN: plasma membrane, vacuole; EXPRESSED IN: 25 plant structures; EXPRESSED DURING: 15 growth stages; CONTAINS InterPro DOMAIN/s: SOUL haem-binding protein (InterPro:IPR006917); BEST Arabidopsis thaliana protein match is: SOUL heme-binding family protein (TAIR:AT3G10130.1)…	AT2G37970	0.399688	-0.134273	0.144089	1.36398	2.01838	0.412058	-0.10813	0.122432	1.58141	2.14019	0.739359	1.41802	-0.18986	-0.0817237		1	1	0.802402	0.0438026	4.62e-08	1	1	0.917606	0.000704307	3.79e-09	0.266205	0.0413663	1.09907	0.951471
protein_coding	anthranilate synthase beta subunit 1	Catalyzes the first step of tryptophan biosynthesis: Chorismate L-Glutamine = Anthranilate Pyruvate L-Glutamate. Functions as a heterocomplex with anthranilate synthase alpha subunit (ASA1 or ASA2).	anthranilate synthase beta subunit 1 (ASB1); FUNCTIONS IN: anthranilate synthase activity; INVOLVED IN: tryptophan biosynthetic process, response to ethylene stimulus, response to bacterium, auxin biosynthetic process, lateral root primordium development; LOCATED IN: chloroplast; EXPRESSED IN: pericycle, cotyledon vascular system, primary root tip, lateral root primordium; CONTAINS InterPro DOMAI…	AT1G25220	1.38231	0.277901	0.0430173	0.917824	1.35563	-0.419273	-0.0964291	-0.330572	1.82786	1.44531	1.83912	1.97237	1.67944	0.126247		1	0.629307	0.897283	0.131939	0.00013724	1	1	0.664002	1.31e-05	9.42e-05	0.00705462	0.0106925	0.0882709	1.18137
protein_coding	WRKY DNA-binding protein 15	Encodes WRKY DNA-binding protein 15 (WRKY15).	WRKY DNA-binding protein 15 (WRKY15); CONTAINS InterPro DOMAIN/s: DNA-binding WRKY (InterPro:IPR003657), Transcription factor, WRKY, Zn-cluster (InterPro:IPR018872); BEST Arabidopsis thaliana protein match is: WRKY DNA-binding protein 11 (TAIR:AT4G31550.1); Has 35333 Blast hits to 34131 proteins in 2444 species: Archae - 798; Bacteria - 22429; Metazoa - 974; Fungi - 991; Plants - 531; Viruses - 0…	AT2G23320	1.02975	0.491474	0.942726	1.47309	1.91404	0.375929	-0.168738	0.325913	1.71968	1.62627	1.38231	1.41781	-0.292436	0.0153031		1	0.624708	0.0843256	0.00233843	2.42e-09	1	0.912143	0.938208	2.88e-05	3.34e-06	0.0231507	0.0403837	1.07218	1.20173
protein_coding	NmrA-like negative transcriptional regulator family protein	encodes a protein whose sequence is similar to phenylcoumaran benzylic ether reductase (PCBER), which catalyzes NADPH-dependent reduction of 8-5' linked lignans such as dehydrodiconiferyl alcohol to give isodihydrodehydrodiconiferyl alcohol.	NmrA-like negative transcriptional regulator family protein; FUNCTIONS IN: phenylcoumaran benzylic ether reductase activity; INVOLVED IN: response to cadmium ion; LOCATED IN: cellular_component unknown; EXPRESSED IN: 25 plant structures; EXPRESSED DURING: 14 growth stages; CONTAINS InterPro DOMAIN/s: NAD(P)-binding domain (InterPro:IPR016040), NmrA-like (InterPro:IPR008030); BEST Arabidopsis thal…	AT4G39230	0.841762	0.651138	1.01615	1.14675	1.20099	-0.270668	-0.313251	0.300291	1.41009	2.20378	1.31042	1.48938	0.0215212	-0.422836		1	0.57201	0.204534	0.297703	0.161936	1	0.897245	0.763723	0.0573357	0.000199758	0.029594	0.0343659	1.11939	1.09223
protein_coding	tryptophan synthase alpha chain	Catalyzes the conversion of indole-3-glycerolphosphate to indole, the penultimate reaction in the biosynthesis of tryptophan. Functions as a heterocomplex with tryptophan synthase beta subunit (TSA2).	tryptophan synthase alpha chain (TSA1); FUNCTIONS IN: tryptophan synthase activity; INVOLVED IN: tryptophan biosynthetic process, defense response to bacterium, defense response by callose deposition in cell wall; LOCATED IN: chloroplast, chloroplast stroma; EXPRESSED IN: 23 plant structures; EXPRESSED DURING: 13 growth stages; CONTAINS InterPro DOMAIN/s: Tryptophan synthase, alpha chain, active …	AT3G54640	0.304672	-0.026007	0.522458	1.21173	2.01231	-0.392687	-0.691906	0.0806871	1.33685	1.54775	1.82351	2.0375	1.96169	0.0330218		1	0.954147	0.297953	0.00138593	7e-11	1	0.577382	1	2.12e-05	7.39e-06	0.0071125	0.00924771	0.0626737	1.21785
protein_coding	FAD-binding Berberine family protein	NA	FAD-binding Berberine family protein; FUNCTIONS IN: electron carrier activity, oxidoreductase activity, FAD binding, catalytic activity; INVOLVED IN: response to oxidative stress; LOCATED IN: apoplast, plasma membrane, plant-type cell wall; EXPRESSED IN: 26 plant structures; EXPRESSED DURING: 14 growth stages; CONTAINS InterPro DOMAIN/s: FAD-binding, type 2 (InterPro:IPR016166), Berberine/berberi…	AT4G20830	0.418456	0.26165	0.638245	1.62273	1.93438	-0.173942	-0.436301	-0.0306802	1.87416	1.6995	1.53753	1.98704	0.258317	-0.143265		1	0.490445	0.215621	0.00019024	5.7e-19	1	0.808002	0.879891	1.37e-09	5.85e-08	0.0174809	0.0107077	1.17487	0.976959
protein_coding	Leucine-rich receptor-like protein kinase family protein	RLK7 belongs to a leucine-rich repeat class of receptor-likekinase (LRR-RLKs). It is involved in the control of germination speed and the tolerance to oxidant stress.	LRR XI-23; FUNCTIONS IN: protein serine/threonine kinase activity, protein kinase activity, kinase activity, ATP binding; INVOLVED IN: protein amino acid phosphorylation, transmembrane receptor protein tyrosine kinase signaling pathway, protein amino acid autophosphorylation; LOCATED IN: plasma membrane; EXPRESSED IN: 22 plant structures; EXPRESSED DURING: 14 growth stages; CONTAINS InterPro DOMA…	AT1G09970	0.37211	0.479408	0.973888	1.96469	2.14519	-0.472604	-0.341661	-0.119923	1.4799	1.11902	1.82283	1.92082	0.959071	0.386577		1	0.410755	0.0537467	2.62e-06	1.37e-21	1	0.898312	0.954767	6.27e-05	0.00136566	0.00706329	0.0124499	0.218815	0.660145
protein_coding	peptidase M20/M25/M40 family protein	encodes a member of the six Arabidopsis IAA-amino acid conjugate hydrolase subfamily and conjugates and conjugates IAA-Ala in vitro. Gene is expressed most strongly in roots, stems, and flowers.	IAA-ALANINE RESISTANT 3 (IAR3); FUNCTIONS IN: metallopeptidase activity, IAA-Ala conjugate hydrolase activity; INVOLVED IN: proteolysis, response to wounding; LOCATED IN: endoplasmic reticulum, plasma membrane; EXPRESSED IN: callus; CONTAINS InterPro DOMAIN/s: Peptidase M20 (InterPro:IPR002933), Peptidase M20D, mername-AA028/carboxypeptidase Ss1 (InterPro:IPR017439), Peptidase M20, dimerisation (…	AT1G51760	0.314258	0.529018	0.571929	1.88488	2.75961	-0.814866	0.159514	-0.0625824	1.79343	1.89461	1.48933	1.59593	3.90884	0.762166		1	0.284411	0.492927	0.000515009	3.04e-27	1	0.986538	0.879825	3.84e-06	1.08e-08	0.0227252	0.0287737	0.00992683	0.375414
protein_coding	soybean gene regulated by cold-2	SRC2 specifically binds the peptide PIEPPPHH, and moves from ER to a vacuole fraction where it gets internalized. Involved in Protein Storage Vacuole targeting.	soybean gene regulated by cold-2 (SRC2); CONTAINS InterPro DOMAIN/s: C2 calcium/lipid-binding domain, CaLB (InterPro:IPR008973), C2 calcium-dependent membrane targeting (InterPro:IPR000008); BEST Arabidopsis thaliana protein match is: Calcium-dependent lipid-binding (CaLB domain) family protein (TAIR:AT3G16510.1); Has 25146 Blast hits to 15856 proteins in 1076 species: Archae - 6; Bacteria - 3010…	AT1G09070	0.231924	0.0575065	1.02694	1.52848	1.44914	0.306188	-0.148912	0.803329	2.56114	2.52571	1.38564	1.58814	-0.674936	0.261584		1	0.898232	0.0204754	0.000859321	9.86e-12	1	0.960713	0.0983644	5.65e-12	1.59e-21	0.0232346	0.0269981	0.470753	1.14675
protein_coding	alpha/beta-Hydrolases superfamily protein	NA	alpha/beta-Hydrolases superfamily protein; FUNCTIONS IN: hydrolase activity; LOCATED IN: chloroplast; EXPRESSED IN: 24 plant structures; EXPRESSED DURING: 15 growth stages; BEST Arabidopsis thaliana protein match is: alpha/beta-Hydrolases superfamily protein (TAIR:AT1G73480.1); Has 1807 Blast hits to 1807 proteins in 277 species: Archae - 0; Bacteria - 0; Metazoa - 736; Fungi - 347; Plants - 385;…	AT5G11650	-0.242771	-0.617817	0.513603	2.59977	1.58821	0.132269	0.0123468	-0.00633173	2.80067	1.97272	0.954063	1.32223	-0.433892	-0.607069		1	0.639768	0.609147	0.0124835	0.0105389	1	1	0.973803	0.00214554	0.000784899	0.0899716	0.0487183	0.916446	1.07906
protein_coding	UDP-Glycosyltransferase superfamily protein	NA	UGT85A1; FUNCTIONS IN: in 6 functions; INVOLVED IN: metabolic process; LOCATED IN: cellular_component unknown; EXPRESSED IN: 22 plant structures; EXPRESSED DURING: 10 growth stages; CONTAINS InterPro DOMAIN/s: UDP-glucuronosyl/UDP-glucosyltransferase (InterPro:IPR002213); BEST Arabidopsis thaliana protein match is: UDP-glucosyl transferase 85A3 (TAIR:AT1G22380.1); Has 7940 Blast hits to 7832 prot…	AT1G22400	0.244737	-0.691837	-0.00353224	1.72274	1.47827	-0.200137	-0.1757	0.326569	2.33867	1.56232	-0.0311482	1.55437	1.17069	0.0609305		1	0.518918	1	0.174326	0.0815485	1	1	1	0.00720409	0.0896936	1.27071	0.0292857	0.162002	1.21616
protein_coding	WRKY DNA-binding protein 33	Member of the plant WRKY transcription factor family. Regulates the antagonistic relationship between defense pathways mediating responses to P. syringae and necrotrophic fungal pathogens. Located in nucleus. Involved in response to various abiotic stresses - especially salt stress.	WRKY DNA-binding protein 33 (WRKY33); CONTAINS InterPro DOMAIN/s: DNA-binding WRKY (InterPro:IPR003657); BEST Arabidopsis thaliana protein match is: WRKY DNA-binding protein 4 (TAIR:AT1G13960.1); Has 7573 Blast hits to 4449 proteins in 326 species: Archae - 2; Bacteria - 120; Metazoa - 293; Fungi - 170; Plants - 5689; Viruses - 9; Other Eukaryotes - 1290 (source: NCBI BLink).	AT2G38470	1.79546	3.06822	0.521717	0.974284	0.0994891	1.57927	1.803	-0.170455	1.57549	0.6253	2.74803	2.92346	0.0229144	0.822907		0.731066	6.03e-13	0.590451	0.210314	1	1	0.0132939	1	0.00291543	0.317153	0.000544304	0.00142857	1.11986	0.225281
protein_coding	Plant invertase/pectin methylesterase inhibitor superfamily	NA	Plant invertase/pectin methylesterase inhibitor superfamily; FUNCTIONS IN: enzyme inhibitor activity, pectinesterase activity; INVOLVED IN: cell wall modification; LOCATED IN: endomembrane system, cell wall, plant-type cell wall; EXPRESSED IN: 20 plant structures; EXPRESSED DURING: 13 growth stages; CONTAINS InterPro DOMAIN/s: Pectinesterase, active site (InterPro:IPR018040), Pectin lyase fold/vi…	AT2G26440	1.58006	4.12019	1.43524	1.35354	1.67199	0.834479	2.49595	0.225665	-0.272692	-0.0390965	2.20903	2.28998	0.0288233	-0.0159982		1	1.96e-21	0.0851224	0.0232653	1.91e-05	1	0.00011424	0.946215	1	0.935539	0.00250345	0.00580392	1.08801	1.15497
protein_coding	Target of Myb protein 1	NA	Target of Myb protein 1; FUNCTIONS IN: protein transporter activity; INVOLVED IN: intracellular protein transport, intra-Golgi vesicle-mediated transport; LOCATED IN: Golgi stack, intracellular; EXPRESSED IN: 21 plant structures; EXPRESSED DURING: 13 growth stages; CONTAINS InterPro DOMAIN/s: VHS (InterPro:IPR002014), Target of Myb protein 1 (InterPro:IPR014645), GAT (InterPro:IPR004152), VHS sub…	AT1G76970	0.822693	2.35647	0.0789874	1.09571	0.861351	0.0314636	1.56342	-1.09729	0.910825	0.00254324	1.75406	2.18784	-0.515444	0.00282554		1	0.00209216	0.988726	0.483972	0.442343	1	0.256606	0.355662	0.4276	1	0.00831985	0.0071	0.785701	1.1322
protein_coding	NPR1-like protein 3	Encodes a paralog of NPR1. Involved in negative regulation of defense responses against bacterial and oomycete pathogens. npr3 mutants has elevated level of PR1 expression. Interacts with TGA2, TGA3, TGA5 and TGA6 in yeast two hybrid assays.	NPR1-like protein 3 (NPR3); INVOLVED IN: defense response to fungus, incompatible interaction, defense response to bacterium, incompatible interaction; LOCATED IN: chloroplast; EXPRESSED IN: 23 plant structures; EXPRESSED DURING: 13 growth stages; CONTAINS InterPro DOMAIN/s: BTB/POZ (InterPro:IPR013069), NPR1/NIM1 like, C-terminal (InterPro:IPR021094), BTB/POZ fold (InterPro:IPR011333), Ankyrin r…	AT5G45110	1.52336	1.8196	-0.379181	0.609742	0.313238	0.357385	2.06472	-0.537843	-0.591342	-0.477221	1.90554	2.12573	0.177959	0.185187		1	0.000157701	0.774362	0.371926	0.958658	1	0.0015573	0.887698	0.800693	0.575919	0.00510046	0.00768367	1.19747	1.16555
protein_coding	Clathrin light chain protein	NA	Clathrin light chain protein; FUNCTIONS IN: structural molecule activity; INVOLVED IN: intracellular protein transport, vesicle-mediated transport; LOCATED IN: clathrin coat of trans-Golgi network vesicle, clathrin coat of coated pit; EXPRESSED IN: 20 plant structures; EXPRESSED DURING: 13 growth stages; CONTAINS InterPro DOMAIN/s: Clathrin light chain (InterPro:IPR000996); BEST Arabidopsis thali…	AT3G51890	0.15974	2.6055	-0.297871	-0.00362375	0.797101	-0.440318	2.15197	-0.807462	-0.964198	-0.0905308	1.49432	1.3889	-0.0651655	-0.0338357		1	9.37e-11	0.920755	1	0.123545	1	6.41e-05	0.432967	0.218909	1	0.0166462	0.0440214	1.06231	0.957071
protein_coding	receptor serine/threonine kinase, putative	NA	receptor serine/threonine kinase, putative; FUNCTIONS IN: transmembrane receptor protein serine/threonine kinase activity, kinase activity; INVOLVED IN: protein amino acid phosphorylation; EXPRESSED IN: 8 plant structures; EXPRESSED DURING: LP.06 six leaves visible, LP.04 four leaves visible, LP.10 ten leaves visible, LP.02 two leaves visible, LP.08 eight leaves visible; CONTAINS InterPro DOMAIN/…	AT4G18250	1.20525	1.66346	1.56989	2.5216	1.67211	1.01776	1.29193	0.253803	1.41019	0.308007	2.28856	2.95204	-0.0126382	0.238778		1	0.000338621	0.00706452	2.17e-05	2.31e-06	1	0.299251	0.860171	0.025077	0.769932	0.00194697	0.00137778	1.03015	1.21653
protein_coding	somatic embryogenesis receptor-like kinase 4	NA	somatic embryogenesis receptor-like kinase 4 (SERK4); FUNCTIONS IN: protein kinase activity, transmembrane receptor protein serine/threonine kinase activity; INVOLVED IN: in 6 processes; LOCATED IN: endomembrane system; EXPRESSED IN: rosette leaf, cauline leaf, fruit, root, flower; CONTAINS InterPro DOMAIN/s: Protein kinase, ATP binding site (InterPro:IPR017441), Protein kinase, catalytic domain …	AT2G13790	0.880282	2.32803	1.81209	2.47897	1.27776	-0.371698	1.84888	0.851607	1.84162	0.350051	2.03241	2.30109	-0.305567	0.0128335		1	9.57e-05	0.00370338	0.00280314	0.0313409	1	0.0376937	0.417838	0.0424107	1	0.00385185	0.00569231	1.06205	1.06604
protein_coding	nitrate transmembrane transporters	Wound-responsive gene 3 (WR3). Encodes a high-affinity nitrate transporter. Up-regulated by nitrate. Involved in jasmonic acid-independent wound signal transduction.	WOUND-RESPONSIVE 3 (WR3); FUNCTIONS IN: nitrate transmembrane transporter activity; INVOLVED IN: nitrate transport, response to nitrate, response to wounding; LOCATED IN: plasma membrane; EXPRESSED IN: 20 plant structures; EXPRESSED DURING: 10 growth stages; CONTAINS InterPro DOMAIN/s: Transporter, high affinity nitrate, Nar2 (InterPro:IPR016605); BEST Arabidopsis thaliana protein match is: Calci…	AT5G50200	0.791923	1.61341	2.05796	1.59371	2.00329	0.631958	0.565672	0.84719	0.93538	1.13262	2.74549	2.95485	-1.14384	-0.13063		1	0.00271661	0.000352388	0.00938986	1.24e-09	1	0.911514	0.306938	0.0640396	0.00397988	0.000583333	0.00138806	0.130226	1.07765
protein_coding	calmodulin-binding family protein	NA	embryo sac development arrest 39 (EDA39); FUNCTIONS IN: calmodulin binding; INVOLVED IN: polar nucleus fusion, response to chitin; LOCATED IN: cellular_component unknown; EXPRESSED IN: 22 plant structures; EXPRESSED DURING: 13 growth stages; CONTAINS InterPro DOMAIN/s: IQ calmodulin-binding region (InterPro:IPR000048); BEST Arabidopsis thaliana protein match is: calmodulin-binding family protein …	AT4G33050	1.01366	1.51291	1.10739	1.71043	1.79963	-0.146127	0.455513	-0.0306533	1.87357	0.956367	2.42923	2.81148	0.100705	0.328929		1	0.00102283	0.181482	0.073587	3.53e-06	1	0.76132	0.951047	0.000263282	0.05314	0.00136364	0.00192053	1.19047	1.00841
protein_coding	MATE efflux family protein	Encodes an orphan multidrug and toxin extrusion transporter. Essential component of salicylic acid-dependent signaling for disease resistance. Member of the MATE-transporter family. Expression induced by salicylic acid. Mutants are salicylic acid-deficient.	ENHANCED DISEASE SUSCEPTIBILITY 5 (EDS5); FUNCTIONS IN: antiporter activity, drug transmembrane transporter activity, transporter activity; INVOLVED IN: salicylic acid biosynthetic process, negative regulation of defense response, defense response, response to nematode; LOCATED IN: mitochondrion, plastid, membrane; EXPRESSED IN: 23 plant structures; EXPRESSED DURING: 10 growth stages; CONTAINS In…	AT4G39030	0.49452	1.29094	0.858169	2.71772	2.09863	-0.355502	0.192639	-0.139845	1.22664	1.15393	2.11554	2.73813	2.46724	0.365588		1	0.030297	0.264524	0.000215208	1.06e-05	1	0.970073	1	0.154849	0.249949	0.00315294	0.00235366	0.038871	1.05576
protein_coding	SAUR-like auxin-responsive protein family	NA	SAUR-like auxin-responsive protein family ; CONTAINS InterPro DOMAIN/s: Auxin responsive SAUR protein (InterPro:IPR003676); BEST Arabidopsis thaliana protein match is: SAUR-like auxin-responsive protein family (TAIR:AT1G56150.1); Has 1206 Blast hits to 1201 proteins in 26 species: Archae - 0; Bacteria - 0; Metazoa - 0; Fungi - 0; Plants - 1205; Viruses - 0; Other Eukaryotes - 1 (source: NCBI BLin…	AT3G12830	1.96143	1.24326	1.28265	1.24779	0.110288	1.58255	1.23447	0.876408	2.06252	0.801591	1.95433	2.72793	-0.222896	-0.624567		0.532432	0.0946119	0.0560983	0.386129	0.931606	1	0.285285	0.197529	0.00150675	0.157041	0.00462381	0.00230675	1.09983	1.10123
protein_coding	ammonium transporter 1;1	Encodes a plasma membrane localized ammonium transporter. Contains a cytosolic trans-activation domain essential for ammonium uptake.	ammonium transporter 1;1 (AMT1;1); FUNCTIONS IN: ammonium transmembrane transporter activity; INVOLVED IN: ammonium transport, transport, protein polymerization, response to karrikin; LOCATED IN: nucleus, plasma membrane, membrane; EXPRESSED IN: 25 plant structures; EXPRESSED DURING: 13 growth stages; CONTAINS InterPro DOMAIN/s: Ammonium transporter (InterPro:IPR001905), Ammonium transporter, con…	AT4G13510	1.59924	2.01386	2.05653	0.89077	-0.107685	0.552495	1.21722	1.02784	0.619394	-0.128794	1.66058	1.81603	-0.881831	-0.0760578		0.967706	1.84e-05	9.13e-05	0.0505095	0.682294	1	0.172957	0.0399832	0.0822999	0.595747	0.0108032	0.0163507	0.290782	1.00511
protein_coding	Protein of unknown function (DUF1645)	NA	Protein of unknown function (DUF1645); CONTAINS InterPro DOMAIN/s: Protein of unknown function DUF1645 (InterPro:IPR012442); BEST Arabidopsis thaliana protein match is: Protein of unknown function (DUF1645) (TAIR:AT1G70420.1); Has 173 Blast hits to 173 proteins in 20 species: Archae - 0; Bacteria - 0; Metazoa - 5; Fungi - 2; Plants - 161; Viruses - 0; Other Eukaryotes - 5 (source: NCBI BLink).	AT5G62770	NE	1.44767	2.21842	1.38956	0.382995	0.480565	0.900653	1.07009	0.668808	0.114391	1.85837	1.86778	0.0212837	-0.192985		NA	0.0478968	0.00411896	0.286006	0.855585	1	0.701601	0.396587	0.707616	1	0.00654783	0.0140909	1.10311	1.0534
protein_coding	fucosyltransferase 4	Predicted fucosyltransferase, based on similarity to FUT1, but not functionally redundant with FUT1.	fucosyltransferase 4 (FUT4); FUNCTIONS IN: transferase activity, transferring glycosyl groups, fucosyltransferase activity; INVOLVED IN: cell wall biogenesis; LOCATED IN: endomembrane system, membrane; EXPRESSED IN: 13 plant structures; EXPRESSED DURING: 8 growth stages; CONTAINS InterPro DOMAIN/s: Xyloglucan fucosyltransferase (InterPro:IPR004938); BEST Arabidopsis thaliana protein match is: fuc…	AT2G15390	4.13664	1.99813	1.83238	2.61526	1.97824	2.86146	1.19947	0.373134	1.58989	0.852544	1.71268	1.75954	0.0462122	0.522301		0.04762	0.00952703	0.00958995	0.0443193	0.002222	1	0.439762	0.504973	0.375266	0.554591	0.00973649	0.0182187	1.10552	0.841593
protein_coding	C2H2-type zinc finger family protein	Encodes a zinc finger protein involved in high light and cold acclimation. Overexpression of this putative transcription factor increases the expression level of 9 cold-responsive genes and represses the expression level of 15 cold-responsive genes, including CBF genes. Also, lines overexpressing this gene exhibits a small but reproducible increase in freeze tolerance. Because of the repression o…	RESPONSIVE TO HIGH LIGHT 41 (RHL41); FUNCTIONS IN: sequence-specific DNA binding transcription factor activity, zinc ion binding, nucleic acid binding; INVOLVED IN: in 11 processes; LOCATED IN: intracellular; EXPRESSED IN: 24 plant structures; EXPRESSED DURING: 13 growth stages; CONTAINS InterPro DOMAIN/s: Zinc finger, C2H2-like (InterPro:IPR015880), Zinc finger, C2H2-type (InterPro:IPR007087); B…	AT5G59820	2.09183	1.04258	0.971421	1.50564	1.58567	2.1044	1.3447	1.0433	1.63755	1.55631	0.922226	1.66304	0.398829	0.202165		0.755851	0.29238	0.128935	0.135641	0.00390563	1	0.498171	0.0522002	0.0549237	0.00699043	0.114841	0.0223445	0.96271	1.14686
protein_coding	salt tolerance zinc finger	Related to Cys2/His2-type zinc-finger proteins found in higher plants. Compensated for a subset of calcineurin deficiency in yeast. Salt tolerance produced by ZAT10 appeared to be partially dependent on ENA1/PMR2, a P-type ATPase required for Li+ and Na+ efflux in yeast. The protein is localized to the nucleus, acts as a transcriptional repressor and is responsive to chitin oligomers. Also involv…	salt tolerance zinc finger (STZ); CONTAINS InterPro DOMAIN/s: Zinc finger, C2H2-like (InterPro:IPR015880), Zinc finger, C2H2-type (InterPro:IPR007087); BEST Arabidopsis thaliana protein match is: zinc finger of Arabidopsis thaliana 6 (TAIR:AT5G04340.1); Has 5350 Blast hits to 3982 proteins in 146 species: Archae - 0; Bacteria - 0; Metazoa - 4198; Fungi - 48; Plants - 937; Viruses - 0; Other Eukar…	AT1G27730	2.68163	1.57943	2.03331	0.442831	2.09598	2.31019	1.09709	1.1877	0.802983	2.43681	3.23906	3.61485	1.93884	1.24156		0.10538	0.0583261	0.0121796	0.662358	0.002623	1	0.581395	0.0523595	0.2132	0.00034643	0.00015	0.000313433	0.0660355	0.0992128
protein_coding	NA	NA	unknown protein; FUNCTIONS IN: molecular_function unknown; INVOLVED IN: biological_process unknown; LOCATED IN: mitochondrion; EXPRESSED IN: 18 plant structures; EXPRESSED DURING: 9 growth stages; Has 1 Blast hits to 1 proteins in 1 species: Archae - 0; Bacteria - 0; Metazoa - 0; Fungi - 0; Plants - 1; Viruses - 0; Other Eukaryotes - 0 (source: NCBI BLink).	AT3G10930	2.17276	1.69519	1.85007	0.819415	2.25354	2.05528	1.47998	NE	-0.299377	0.907632	1.4137	3.45295	1.75942	0.212855		0.647981	0.0743207	0.0207293	0.376443	0.00172028	1	0.419124	NA	1	0.611411	0.0409965	0.00045	0.0810879	1.18212
protein_coding	NA	NA	unknown protein; Has 31 Blast hits to 31 proteins in 9 species: Archae - 0; Bacteria - 0; Metazoa - 0; Fungi - 0; Plants - 31; Viruses - 0; Other Eukaryotes - 0 (source: NCBI BLink).	AT2G25735	1.59228	3.1303	0.161223	-0.405501	0.914292	1.39329	NE	0.756363	0.659664	2.09036	2.18518	2.29654	1.47693	0.909951		1	0.0134183	0.785883	0.805809	0.465481	1	NA	0.347038	0.849135	0.0068333	0.00262416	0.00579365	0.105815	0.220568
protein_coding	serine/threonine protein kinase 2	Encodes a ribosomal-protein S6 kinase. Gene expression is induced by cold and salt (NaCl). Activation of AtS6k is regulated by 1-naphthylacetic acid and kinetin, at least in part, via a lipid kinase-dependent pathway. Phosphorylates specifically mammalian and plant S6 at 25 degrees C but not at 37 degrees C. Involved in translational up-regulation of ribosomal proteins.	Arabidopsis thaliana protein kinase 19 (ATPK19); CONTAINS InterPro DOMAIN/s: Protein kinase, ATP binding site (InterPro:IPR017441), Serine/threonine-protein kinase domain (InterPro:IPR002290), Serine/threonine-protein kinase-like domain (InterPro:IPR017442), AGC-kinase, C-terminal (InterPro:IPR000961), Protein kinase-like domain (InterPro:IPR011009), Protein kinase, C-terminal (InterPro:IPR017892…	AT3G08720	-0.562226	2.44057	NE	2.95399	2.11894	-2.06599	NE	NE	2.38707	1.2173	0.916464	1.65882	0.831445	0.522762		1	0.143017	NA	0.0613161	0.00569867	1	NA	NA	0.166858	0.348146	0.137488	0.0231328	0.430163	0.838715
protein_coding	Heat shock protein 70 (Hsp 70) family protein	Luminal binding protein (BiP2) involved in polar nuclei fusion during proliferation of endosperm nuclei.	luminal binding protein (BIP); FUNCTIONS IN: ATP binding; INVOLVED IN: protein folding, response to cadmium ion, response to heat, polar nucleus fusion, response to endoplasmic reticulum stress; LOCATED IN: in 8 components; EXPRESSED IN: 7 plant structures; EXPRESSED DURING: seedling growth, seed development stages; CONTAINS InterPro DOMAIN/s: Heat shock protein 70, conserved site (InterPro:IPR01…	AT5G42020	-0.949158	1.02755	1.58688	1.83918	1.27576	-0.791481	0.494374	1.33987	1.74012	0.455899	2.26342	2.58878	0.142168	-0.277486		1	0.00572974	0.000427881	0.000486447	1.25e-07	1	0.581395	0.00952468	3.95e-08	0.178877	0.00208571	0.00329255	1.19775	1.12877
protein_coding	heat shock protein 70 (Hsp 70) family protein	Encodes the luminal binding protein BiP, an ER-localized member of the HSP70 family. BiP is composed of an N-terminal ATP binding domain and a C-terminal domain that binds to hydrophobic patches on improperly/incompletely folded proteins in an ATP-dependent manner. Involved in polar nuclei fusion during proliferation of endosperm nuclei.	BIP1; FUNCTIONS IN: ATP binding; INVOLVED IN: protein folding, ER-associated protein catabolic process, response to heat, polar nucleus fusion; LOCATED IN: cell wall, plasma membrane, chloroplast, vacuole, endoplasmic reticulum lumen; EXPRESSED IN: 8 plant structures; EXPRESSED DURING: L mature pollen stage, M germinated pollen stage, seedling growth; CONTAINS InterPro DOMAIN/s: Heat shock protei…	AT5G28540	-0.754573	0.522162	1.37898	1.43717	1.549	-0.390253	0.163781	1.12405	1.27291	0.951067	2.26342	2.58878	0.142168	-0.277486		1	0.183325	0.00285932	0.000905012	5.21e-06	1	0.92506	0.0666121	0.000188447	0.0163816	0.00208571	0.00329255	1.19775	1.12877
protein_coding	calreticulin 1a	Encodes one of three Arabidopsis calreticulins. In CRT-deficient mouse fibroblasts, this protein restores ER Ca2+ levels.	calreticulin 1a (CRT1a); FUNCTIONS IN: unfolded protein binding, calcium ion binding; INVOLVED IN: response to oxidative stress, response to cadmium ion, response to salt stress, calcium ion homeostasis; LOCATED IN: mitochondrion, endoplasmic reticulum, plasma membrane; EXPRESSED IN: 27 plant structures; EXPRESSED DURING: 14 growth stages; CONTAINS InterPro DOMAIN/s: Calreticulin/calnexin, P (Int…	AT1G56340	-0.561788	1.49895	0.783148	1.56888	1.6497	-0.326046	1.11523	0.583255	1.06163	0.794171	1.80416	1.91859	0.348183	-0.0980188		1	0.000202625	0.111211	5.08e-05	4.82e-15	1	0.156224	0.442933	0.000133029	0.0164311	0.00739841	0.0124823	0.975683	1.10166
protein_coding	FAD/NAD(P)-binding oxidoreductase family protein	NA	FAD/NAD(P)-binding oxidoreductase family protein; FUNCTIONS IN: monooxygenase activity; INVOLVED IN: oxidation reduction; LOCATED IN: cellular_component unknown; EXPRESSED IN: 8 plant structures; EXPRESSED DURING: 9 growth stages; CONTAINS InterPro DOMAIN/s: Monooxygenase, FAD-binding (InterPro:IPR002938); BEST Arabidopsis thaliana protein match is: FAD/NAD(P)-binding oxidoreductase family protei…	AT5G05320	NE	1.14529	0.88551	0.857111	1.50525	NE	0.733925	-0.068644	0.779196	1.12946	1.90881	1.57089	-0.159975	-0.648076		NA	0.377866	0.159814	0.345203	0.000873896	NA	0.878555	0.87189	0.239997	0.0480602	0.00513575	0.0281196	1.0934	1.02989
protein_coding	autoinhibited Ca2+-ATPase 1	Encodes a chloroplast envelope Ca2+-ATPase with an N-terminal autoinhibitor.	autoinhibited Ca2+-ATPase 1 (ACA1); FUNCTIONS IN: calcium channel activity, calcium-transporting ATPase activity, calmodulin binding; INVOLVED IN: cation transport, calcium ion transport, ATP biosynthetic process; LOCATED IN: endoplasmic reticulum, plasma membrane, chloroplast inner membrane; EXPRESSED IN: 24 plant structures; EXPRESSED DURING: 13 growth stages; CONTAINS InterPro DOMAIN/s: ATPase…	AT1G27770	0.410668	1.10425	0.665043	1.26558	1.30454	0.234693	0.699104	0.0561062	1.00176	0.714062	1.64145	2.11581	-0.161954	0.0349585		1	0.0097047	0.246296	0.0240091	0.000827689	1	0.491516	0.941157	0.0375468	0.111303	0.0108217	0.00815563	1.09162	1.20144
protein_coding	PDI-like 1-1	Encodes a protein disulfide isomerase-like (PDIL) protein, a member of a multigene family within the thioredoxin (TRX) superfamily; isoform contains non-consensus GA donor splice site at intron 9. Transcript levels for this gene are up-regulated in response to three different chemical inducers of ER stress (dithiothreitol, beta-mercaptoethanol, and tunicamycin). Neither AtIRE1-2 nor AtbZIP60 appe…	PDI-like 1-1 (PDIL1-1); FUNCTIONS IN: protein disulfide isomerase activity; INVOLVED IN: in 6 processes; LOCATED IN: in 8 components; EXPRESSED IN: 29 plant structures; EXPRESSED DURING: 16 growth stages; CONTAINS InterPro DOMAIN/s: Thioredoxin fold (InterPro:IPR012335), Disulphide isomerase (InterPro:IPR005788), Thioredoxin domain (InterPro:IPR013766), Thioredoxin, conserved site (InterPro:IPR01…	AT1G21750	-0.0624877	1.11216	0.686826	1.52332	1.71566	0.119608	0.504922	0.32596	1.09855	0.852025	1.22818	1.56412	-0.0501208	-0.00611802		1	0.00738157	0.244833	0.00147933	1.51e-12	1	0.654309	0.626583	0.000585982	0.00196299	0.0370958	0.029083	1.04281	0.966766
protein_coding	autoinhibited Ca(2+)-ATPase 10	one of the type IIB calcium pump isoforms. encodes an autoinhibited Ca(2+)-ATPase that contains an N-terminal calmodulin binding autoinhibitory domain.	autoinhibited Ca(2+)-ATPase 10 (ACA10); FUNCTIONS IN: calcium-transporting ATPase activity, calmodulin binding; INVOLVED IN: shoot development, inflorescence morphogenesis; LOCATED IN: plasma membrane; EXPRESSED IN: 25 plant structures; EXPRESSED DURING: 13 growth stages; CONTAINS InterPro DOMAIN/s: ATPase, P-type, ATPase-associated domain (InterPro:IPR008250), ATPase, P-type, calcium-transportin…	AT4G29900	-0.121382	0.860982	0.408861	1.91749	1.13234	0.0932747	0.598613	-0.125541	1.97643	0.858256	1.73258	1.90977	0.259779	-0.151387		1	0.0948963	0.753072	0.000599792	0.00173043	1	0.632864	0.963364	2.79e-05	0.0538511	0.00828782	0.0125137	1.16253	1.01223
protein_coding	heat shock protein 90.1	Encodes a cytosolic heat shock protein AtHSP90.1. AtHSP90.1 interacts with disease resistance signaling components SGT1b and RAR1 and is required for RPS2-mediated resistance.	heat shock protein 90.1 (HSP90.1); FUNCTIONS IN: unfolded protein binding, ATP binding; INVOLVED IN: defense response to bacterium, response to heat, response to arsenic; LOCATED IN: cytosol, cell wall, plasma membrane; EXPRESSED IN: 25 plant structures; EXPRESSED DURING: 14 growth stages; CONTAINS InterPro DOMAIN/s: Chaperone protein htpG (InterPro:IPR001404), Heat shock protein Hsp90, conserved…	AT5G52640	-0.638778	0.981058	1.36001	1.94714	0.601206	-0.672164	1.04259	-0.219087	2.32742	1.1518	2.60686	1.79246	-0.532359	-0.822876		1	0.113098	0.03187	0.162252	0.34341	1	0.37315	0.965751	0.00962209	0.174051	0.000703297	0.0163302	0.645387	0.791014
protein_coding	heat shock protein 70	NA	heat shock protein 70 (HSP70); FUNCTIONS IN: ATP binding; INVOLVED IN: in 9 processes; LOCATED IN: cytosol, mitochondrion, cell wall, plasma membrane; EXPRESSED IN: 23 plant structures; EXPRESSED DURING: 11 growth stages; CONTAINS InterPro DOMAIN/s: Heat shock protein 70, conserved site (InterPro:IPR018181), Heat shock protein Hsp70 (InterPro:IPR001023), Heat shock protein 70 (InterPro:IPR013126)…	AT3G12580	-0.568742	1.3765	1.83583	2.87535	2.11973	-0.647094	1.22033	0.189653	2.09156	0.657723	1.61894	0.507873	0.584876	-0.833711		1	0.0728811	0.08117	0.00209057	3.31e-06	1	0.386781	0.879891	0.00757919	0.57548	0.0129822	0.504452	0.684064	0.681644
protein_coding	ATPase, AAA-type, CDC48 protein	NA	ATPase, AAA-type, CDC48 protein; FUNCTIONS IN: hydrolase activity, nucleoside-triphosphatase activity, binding, nucleotide binding, ATP binding; INVOLVED IN: response to cadmium ion; LOCATED IN: cytosol, nucleolus, plasma membrane; EXPRESSED IN: 24 plant structures; EXPRESSED DURING: 13 growth stages; CONTAINS InterPro DOMAIN/s: ATPase, AAA+ type, core (InterPro:IPR003593), ATPase, AAA-type, core…	AT3G53230	-0.524837	0.0581596	1.73355	1.38274	0.361822	-0.599284	-0.0426715	1.45993	3.24834	2.46038	1.74	1.21667	-0.0293644	-0.324932		1	1	0.00273963	0.153828	0.787171	1	1	0.00669399	1.06e-10	1.2e-07	0.00857401	0.0638746	1.09772	1.12455
protein_coding	Auxin-responsive GH3 family protein	encodes an IAA-amido synthase that conjugates Asp and other amino acids to auxin in vitro. Lines carrying insertions in this gene are hypersensitive to auxin.	WES1; CONTAINS InterPro DOMAIN/s: GH3 auxin-responsive promoter (InterPro:IPR004993); BEST Arabidopsis thaliana protein match is: Auxin-responsive GH3 family protein (TAIR:AT5G54510.1); Has 1807 Blast hits to 1807 proteins in 277 species: Archae - 0; Bacteria - 0; Metazoa - 736; Fungi - 347; Plants - 385; Viruses - 0; Other Eukaryotes - 339 (source: NCBI BLink).	AT4G27260	0.548394	2.22148	1.47108	1.97411	1.68976	-0.307029	NE	1.57161	3.24035	3.25735	1.37093	1.01887	-0.588322	-0.453232		1	0.0455478	0.211279	0.174326	0.161207	1	NA	0.086146	0.000159875	1.07e-05	0.0284802	0.139975	0.645697	1.10225
protein_coding	cytochrome P450, family 81, subfamily D, polypeptide 8	member of CYP81D	cytochrome P450, family 81, subfamily D, polypeptide 8 (CYP81D8); FUNCTIONS IN: electron carrier activity, monooxygenase activity, iron ion binding, oxygen binding, heme binding; INVOLVED IN: response to karrikin; LOCATED IN: endoplasmic reticulum, plasma membrane; EXPRESSED IN: 20 plant structures; EXPRESSED DURING: 13 growth stages; CONTAINS InterPro DOMAIN/s: Cytochrome P450 (InterPro:IPR00112…	AT4G37370	0.86641	1.73602	1.31692	1.02507	1.20848	0.020103	0.716615	0.810171	2.20261	1.39643	3.29883	3.03042	0.058911	0.143311		1	0.0625638	0.0881139	0.331012	0.0520993	1	0.911647	0.274843	0.000304846	0.00888501	9.68e-05	0.00113008	1.11903	1.20004
protein_coding	WRKY family transcription factor	member of WRKY Transcription Factor; Group III	WRKY53; FUNCTIONS IN: protein binding, DNA binding, transcription activator activity, sequence-specific DNA binding transcription factor activity; INVOLVED IN: in 6 processes; LOCATED IN: nucleus, chloroplast; EXPRESSED IN: 20 plant structures; EXPRESSED DURING: 12 growth stages; CONTAINS InterPro DOMAIN/s: DNA-binding WRKY (InterPro:IPR003657); BEST Arabidopsis thaliana protein match is: WRKY fa…	AT4G23810	1.06539	3.85765	1.86504	2.02936	1.47824	0.0139884	3.65786	-0.495706	2.81669	1.643	3.87325	4.55291	-0.192074	0.469519		1	7.32e-09	0.0206316	0.269575	0.0407328	1	7.51e-06	0.711712	0.0108033	0.0366269	6.25e-05	0	1.09923	0.69272
protein_coding	Heavy metal transport/detoxification superfamily protein	NA	Heavy metal transport/detoxification superfamily protein ; FUNCTIONS IN: metal ion binding; INVOLVED IN: metal ion transport; LOCATED IN: cellular_component unknown; EXPRESSED IN: 20 plant structures; EXPRESSED DURING: 13 growth stages; CONTAINS InterPro DOMAIN/s: Heavy metal transport/detoxification protein (InterPro:IPR006121); BEST Arabidopsis thaliana protein match is: farnesylated protein 3 …	AT5G50740	-0.19901	-1.81941	1.05356	-2.90027	-0.0785621	-1.08328	-2.67628	0.356572	-3.29792	-0.430391	-1.61544	-1.82708	-0.0756091	-0.256564		1	0.0130832	0.0432688	2.19e-17	0.744988	1	0.000250022	0.450779	1.7e-22	0.266256	0.0129204	0.00877652	1.09821	1.02551
protein_coding	Protein kinase superfamily protein	NA	Protein kinase superfamily protein; FUNCTIONS IN: protein serine/threonine/tyrosine kinase activity, kinase activity; INVOLVED IN: protein amino acid phosphorylation; LOCATED IN: cellular_component unknown; EXPRESSED IN: 8 plant structures; EXPRESSED DURING: LP.06 six leaves visible, 4 anthesis, petal differentiation and expansion stage; CONTAINS InterPro DOMAIN/s: Protein kinase, catalytic domai…	AT3G01490	-0.0981356	-2.10389	1.23141	-2.62758	0.71563	-1.18681	-2.59695	0.840541	-2.80557	0.0339964	-1.24702	-1.49256	-1.19396	-0.731402		1	2.33e-05	0.021597	3.47e-14	0.18476	1	5.84e-08	0.208803	2.55e-17	0.905782	0.0468991	0.0253428	0.0984123	0.937295
protein_coding	Homeodomain-like superfamily protein	EARLY-PHYTOCHROME-RESPONSIVE1	EARLY-PHYTOCHROME-RESPONSIVE1 (EPR1); CONTAINS InterPro DOMAIN/s: SANT, DNA-binding (InterPro:IPR001005), Homeodomain-like (InterPro:IPR009057), Myb, DNA-binding (InterPro:IPR014778), HTH transcriptional regulator, Myb-type, DNA-binding (InterPro:IPR017930), Myb-like DNA-binding domain, SHAQKYF class (InterPro:IPR006447); BEST Arabidopsis thaliana protein match is: Homeodomain-like superfamily pr…	AT1G18330	-0.19087	-2.74889	0.714889	-3.40849	-0.625574	-0.233311	-0.0944475	NE	NE	NE	-0.855385	-1.51709	-1.16596	-0.745863		1	2.02e-07	0.522039	6.3e-10	0.467063	1	1	NA	NA	NA	0.179453	0.0218542	0.108754	0.938467
protein_coding	germin 3	Encodes a germin-like protein. Its transcripts are more abundant in RNA from leaves collected in the evening, suggesting some kind of circadian regulation.	germin 3 (GER3); INVOLVED IN: response to cold, peptidyl-cysteine S-nitrosylation; LOCATED IN: extracellular matrix, apoplast, cell wall, nucleus, plant-type cell wall; EXPRESSED IN: 22 plant structures; EXPRESSED DURING: 14 growth stages; CONTAINS InterPro DOMAIN/s: Cupin, RmlC-type (InterPro:IPR011051), Cupin 1 (InterPro:IPR006045), RmlC-like jelly roll fold (InterPro:IPR014710), Germin (InterP…	AT5G20630	0.280493	0.660408	-0.481292	0.065508	-0.856048	0.36382	0.489043	0.0299391	0.569433	-0.25318	-6.22677	-6.46664	-0.48497	-0.184157		1	0.0625638	0.463009	0.861462	0.000235348	1	0.570151	1	0.0262129	1	0	0	0.777348	1.07267
protein_coding	Bifunctional inhibitor/lipid-transfer protein/seed storage 2S albumin superfamily protein	NA	Bifunctional inhibitor/lipid-transfer protein/seed storage 2S albumin superfamily protein; FUNCTIONS IN: lipid binding; INVOLVED IN: lipid transport; LOCATED IN: chloroplast thylakoid membrane, apoplast, chloroplast, membrane; EXPRESSED IN: 21 plant structures; EXPRESSED DURING: 13 growth stages; CONTAINS InterPro DOMAIN/s: Bifunctional inhibitor/plant lipid transfer protein/seed storage (InterPr…	AT2G10940	0.475911	1.83209	-0.648496	0.259999	-1.14101	1.03052	1.68367	-0.554343	0.336655	-0.987591	-5.13565	-5.18583	-0.403118	-0.179092		1	5e-07	0.373577	0.85909	2.35e-05	1	0.00435711	0.380221	0.990235	0.062392	0	0	0.945745	1.03667
protein_coding	Gibberellin-regulated family protein	NA	Gibberellin-regulated family protein; FUNCTIONS IN: molecular_function unknown; INVOLVED IN: in 6 processes; LOCATED IN: endomembrane system; EXPRESSED IN: 21 plant structures; EXPRESSED DURING: 13 growth stages; CONTAINS InterPro DOMAIN/s: Gibberellin regulated protein (InterPro:IPR003854); BEST Arabidopsis thaliana protein match is: GAST1 protein homolog 4 (TAIR:AT5G15230.1); Has 479 Blast hits…	AT1G74670	0.00359618	0.309244	-0.951554	-0.510487	-1.01156	0.745581	0.838588	-0.261371	-0.217031	-0.32889	-4.27431	-4.81998	-3.65271	-1.21729		1	0.719	0.15684	0.672183	0.00333451	1	0.294707	0.720575	0.537413	0.680384	0	0	0	0.244385
protein_coding	NA	NA	unknown protein; FUNCTIONS IN: molecular_function unknown; INVOLVED IN: biological_process unknown; LOCATED IN: endomembrane system; EXPRESSED IN: 22 plant structures; EXPRESSED DURING: 13 growth stages; Has 8 Blast hits to 8 proteins in 4 species: Archae - 0; Bacteria - 0; Metazoa - 0; Fungi - 0; Plants - 8; Viruses - 0; Other Eukaryotes - 0 (source: NCBI BLink).	AT1G12845	0.594795	0.256337	0.439074	0.0349985	-1.11196	0.645517	0.568761	0.879511	0.216035	-0.765654	-3.55849	-4.24593	-0.237083	-0.710801		1	0.802373	0.526092	1	0.00253246	1	0.721214	0.16386	0.934476	0.12745	0	0	1.0836	1.10026
protein_coding	Leucine-rich repeat (LRR) family protein	Plays role in DNA-damage repair/toleration. Partially complements RecA- phenotypes.	DNA-DAMAGE REPAIR/TOLERATION 100 (DRT100); CONTAINS InterPro DOMAIN/s: Leucine-rich repeat-containing N-terminal domain, type 2 (InterPro:IPR013210), Leucine-rich repeat (InterPro:IPR001611); BEST Arabidopsis thaliana protein match is: Leucine-rich repeat (LRR) family protein (TAIR:AT3G20820.1); Has 34126 Blast hits to 33731 proteins in 4830 species: Archae - 159; Bacteria - 16481; Metazoa - 3906…	AT3G12610	0.534332	0.274483	-0.288361	-0.134085	-1.06983	0.455729	0.121069	0.0234103	-0.0272555	-0.456417	-3.96176	-3.81746	-1.19139	-0.68686		1	0.674663	0.611696	0.913717	3.61e-05	1	1	1	0.796334	0.550455	0	0	0.098823	1.01726
protein_coding	delta tonoplast integral protein	Delta tonoplast intrinsic protein, functions as a water channel and ammonium (NH3) transporter. Highly expressed in flower, shoot, and stem. Expression shows diurnal regulation and is induced by ammonium (NH3). Protein localized to vacuolar membrane.	delta tonoplast integral protein (DELTA-TIP); FUNCTIONS IN: water channel activity, ammonia transmembrane transporter activity, urea transmembrane transporter activity, methylammonium transmembrane transporter activity; INVOLVED IN: transport, urea transport, water transport; LOCATED IN: in 10 components; EXPRESSED IN: 27 plant structures; EXPRESSED DURING: 14 growth stages; CONTAINS InterPro DOM…	AT3G16240	0.496541	0.417921	0.018763	-0.170481	-0.958822	0.850678	0.823638	0.552548	0.00647824	-0.240768	-3.54661	-3.49816	-0.33577	-0.338761		1	0.409159	0.966789	0.949661	0.00264992	1	0.251534	0.432967	0.768239	0.907587	0	4e-05	1.03378	1.15443
protein_coding	Scorpion toxin-like knottin superfamily protein	Encodes a defensin-like (DEFL) family protein.	Scorpion toxin-like knottin superfamily protein; FUNCTIONS IN: ion channel inhibitor activity; INVOLVED IN: defense response; LOCATED IN: endomembrane system, extracellular region; EXPRESSED IN: 22 plant structures; EXPRESSED DURING: 13 growth stages; CONTAINS InterPro DOMAIN/s: Scorpion long chain toxin (InterPro:IPR002061), Knottin (InterPro:IPR003614); BEST Arabidopsis thaliana protein match i…	AT2G43550	0.244835	-0.472663	-0.249492	-0.258732	-0.53036	-0.60779	-0.194007	0.0659754	-1.0715	-1.48273	-3.77144	-4.28405	3.2829	1.11816		1	0.41405	0.724276	0.745034	0.0197005	1	0.984704	0.947296	0.000108147	7.99e-07	0	0	0.0188437	0.114441
protein_coding	photosystem II light harvesting complex gene 2.3	Encodes Lhcb2.4. Belongs to the Lhc super-gene family encodes the light-harvesting chlorophyll a/b-binding (LHC) proteins that constitute the antenna system of the photosynthetic apparatus.	photosystem II light harvesting complex gene 2.3 (LHCB2.3); FUNCTIONS IN: chlorophyll binding; INVOLVED IN: response to blue light, response to red light, response to far red light, photosynthesis; LOCATED IN: light-harvesting complex, thylakoid, chloroplast thylakoid membrane, chloroplast envelope; EXPRESSED IN: 27 plant structures; EXPRESSED DURING: 13 growth stages; CONTAINS InterPro DOMAIN/s:…	AT3G27690	-0.0811313	-0.398001	-0.0891713	-0.414753	-0.59204	-0.289528	-0.446746	-0.184963	-0.207791	-0.511284	-2.54107	-3.77482	-0.453228	-0.102413		1	0.4327	0.834394	0.588019	0.00139226	1	0.516067	0.654559	0.630194	0.189155	0.000608696	0	0.841622	1.01304
protein_coding	cold-regulated 15a	A cold-regulated gene whose product is targeted to the chloroplast. Cor15am protects stromal proteins from aggregation under various stress conditions. Constitutive expression increases freezing tolerance in protoplasts in vitro and chloroplasts in vivo. NMR and x-ray diffraction studies suggest that COR15a alters the intrinsic curvature of the inner membrane of chloroplast envelope. Late Embryog…	cold-regulated 15a (COR15A); FUNCTIONS IN: molecular_function unknown; INVOLVED IN: in 9 processes; LOCATED IN: chloroplast stroma; EXPRESSED IN: 21 plant structures; EXPRESSED DURING: 13 growth stages; BEST Arabidopsis thaliana protein match is: cold regulated 15b (TAIR:AT2G42530.1).	AT2G42540	-0.821998	-1.23822	-0.439281	-0.71377	-1.11693	-1.03981	-0.53123	0.00672178	0.196172	-0.337335	-2.33997	-3.30842	0.60577	0.222417		1	0.000594533	0.690004	0.407782	0.00596868	1	0.60351	0.996735	0.484056	0.709282	0.000779661	6.67e-05	0.761257	1.15392
protein_coding	sigma factor 4	Encodes sigma 4 factor, involved in regulating the activity of the plastid-encoded RNA polymerase PEP. Regulates the overall quantity of NDH complexes and thus influences NDH activity.	sigma factor 4 (SIG4); FUNCTIONS IN: DNA-directed RNA polymerase activity, sigma factor activity, DNA binding, sequence-specific DNA binding transcription factor activity; INVOLVED IN: regulation of transcription, DNA-dependent, transcription initiation; LOCATED IN: chloroplast; EXPRESSED IN: 20 plant structures; EXPRESSED DURING: 13 growth stages; CONTAINS InterPro DOMAIN/s: RNA polymerase sigma…	AT5G13730	-0.668373	-1.02019	-0.287567	-0.19362	0.397056	-0.604511	-1.0188	-0.370728	0.41594	0.899491	-2.57915	-2.25072	-0.680932	-0.137779		1	0.00876396	0.752302	0.96072	0.235263	1	0.162366	0.501819	0.282618	0.0161125	0.0003	0.00251515	0.465729	0.954413
protein_coding	methyl esterase 10	Encodes a protein shown to have methyl jasmonate esterase activity in vitro. This protein does not act on methyl IAA, MeSA, MeGA4, or MEGA9 in vitro.	methyl esterase 10 (MES10); CONTAINS InterPro DOMAIN/s: Alpha/beta hydrolase fold-1 (InterPro:IPR000073); BEST Arabidopsis thaliana protein match is: methyl esterase 1 (TAIR:AT2G23620.1); Has 1602 Blast hits to 1600 proteins in 360 species: Archae - 4; Bacteria - 838; Metazoa - 1; Fungi - 25; Plants - 612; Viruses - 0; Other Eukaryotes - 122 (source: NCBI BLink).	AT3G50440	-0.50093	-1.34898	-0.392796	0.375333	0.248382	-0.159078	-1.10335	-0.336409	0.535805	1.39382	-2.46893	-2.89486	0.256317	-0.151436		1	8.17e-05	0.633543	0.588019	0.456173	1	0.0520831	0.51763	0.227653	8.29e-09	0.000545455	0.000314815	1.17119	1.02894
protein_coding	serine carboxypeptidase-like 13	NA	serine carboxypeptidase-like 13 (SCPL13); FUNCTIONS IN: serine-type carboxypeptidase activity; INVOLVED IN: proteolysis; LOCATED IN: endomembrane system; EXPRESSED IN: 23 plant structures; EXPRESSED DURING: 13 growth stages; CONTAINS InterPro DOMAIN/s: Peptidase S10, serine carboxypeptidase (InterPro:IPR001563); BEST Arabidopsis thaliana protein match is: serine carboxypeptidase-like 11 (TAIR:AT2…	AT2G22980	-0.0747588	-0.696814	-1.25761	-0.0488372	0.417958	-0.218965	-0.057676	-0.840718	0.0153601	0.644596	-2.80512	-3.15689	-0.48413	-0.254058		1	0.123751	0.00818617	1	0.177336	1	1	0.0535346	0.906952	0.0161725	0.000115385	0.000212121	0.781798	1.0353
protein_coding	NDH-dependent cyclic electron flow 1	encodes a novel subunit of the chloroplast NAD(P)H dehydrogenase complex, involved in cyclic electron flow around photosystem I to produce ATP. Contains a 4Fe-4S cluster.	NDH-dependent cyclic electron flow 1 (NDF4); FUNCTIONS IN: electron carrier activity, iron-sulfur cluster binding; INVOLVED IN: photosynthetic electron transport in photosystem I; LOCATED IN: chloroplast thylakoid membrane, chloroplast, NAD(P)H dehydrogenase complex (plastoquinone); EXPRESSED IN: 21 plant structures; EXPRESSED DURING: 13 growth stages; CONTAINS InterPro DOMAIN/s: Ferredoxin (Inte…	AT3G16250	-0.299647	-1.08257	-0.818756	-0.251624	-0.114668	-0.404573	-0.864458	-0.87922	-0.489018	-0.362762	-3.36838	-2.97747	-0.355275	-0.203842		1	0.0011175	0.0964738	0.498374	0.612333	1	0.220332	0.0681964	0.138149	0.126407	7.69e-05	0.000285714	0.995554	1.14191
protein_coding	photosystem I light harvesting complex gene 6	PSI type II chlorophyll a/b-binding protein (Lhca2*1) mRNA,	photosystem I light harvesting complex gene 6 (LHCA6); FUNCTIONS IN: chlorophyll binding; INVOLVED IN: response to blue light, response to red light, response to far red light, photosynthesis; LOCATED IN: light-harvesting complex, chloroplast; EXPRESSED IN: 24 plant structures; EXPRESSED DURING: 13 growth stages; CONTAINS InterPro DOMAIN/s: Chlorophyll A-B binding protein (InterPro:IPR001344); BE…	AT1G19150	-0.284198	-0.581396	-0.282962	-0.156204	-0.614557	-0.408879	-0.784607	-0.256545	-0.153313	-0.439829	-3.35838	-3.09206	-0.892008	-0.0277104		1	0.179262	0.611696	0.903971	0.00362045	1	0.249758	0.579937	0.875032	0.277082	8.33e-05	0.0003	0.240607	1.02771
protein_coding	NA	NA	unknown protein; BEST Arabidopsis thaliana protein match is: unknown protein (TAIR:AT1G27020.1); Has 504 Blast hits to 502 proteins in 169 species: Archae - 0; Bacteria - 299; Metazoa - 0; Fungi - 0; Plants - 67; Viruses - 0; Other Eukaryotes - 138 (source: NCBI BLink).	AT1G27030	-1.01763	-0.684557	-0.457654	0.289775	-0.667682	-1.08567	-0.623026	-0.522387	1.3824	0.962185	-3.08149	-2.9595	0.433238	0.339608		1	0.219189	0.624978	0.62679	0.0968101	1	0.510063	0.402535	3.19e-06	0.00186116	6.25e-05	0.000295455	0.865985	1.15139
protein_coding	Plant invertase/pectin methylesterase inhibitor superfamily protein	NA	Plant invertase/pectin methylesterase inhibitor superfamily protein; FUNCTIONS IN: enzyme inhibitor activity, pectinesterase inhibitor activity, pectinesterase activity; INVOLVED IN: biological_process unknown; LOCATED IN: cellular_component unknown; EXPRESSED IN: 22 plant structures; EXPRESSED DURING: 13 growth stages; CONTAINS InterPro DOMAIN/s: Pectinesterase inhibitor (InterPro:IPR006501); BE…	AT5G62360	-0.441552	-0.260542	-0.958806	-0.726507	-1.08748	-0.112694	0.660888	0.0880608	0.761013	1.24337	-2.85376	-3.31625	1.83032	0.281754		1	0.538711	0.170841	0.305573	0.00460949	1	0.435794	0.981951	0.489706	0.000344068	0.0001	7.41e-05	0.129144	1.20803
protein_coding	xyloglucan endotransglucosylase/hydrolase 6	NA	xyloglucan endotransglucosylase/hydrolase 6 (XTH6); FUNCTIONS IN: hydrolase activity, acting on glycosyl bonds, hydrolase activity, hydrolyzing O-glycosyl compounds, xyloglucan:xyloglucosyl transferase activity; INVOLVED IN: response to water deprivation; LOCATED IN: endomembrane system, cell wall, apoplast; EXPRESSED IN: 21 plant structures; EXPRESSED DURING: 14 growth stages; CONTAINS InterPro …	AT5G65730	-0.259005	-0.683595	-0.41486	-0.535915	-0.378556	0.269835	-0.182351	-0.0194214	0.487996	0.986487	-4.09105	-4.3959	-0.928753	-0.447141		1	0.130874	0.591598	0.617933	0.302114	1	0.973244	0.866577	0.803172	0.000537395	0	0	0.282754	1.1335
protein_coding	xyloglucan endo-transglycosylase-related 8	xyloglucan endo-transglycosylase	xyloglucan endo-transglycosylase-related 8 (XTR8); FUNCTIONS IN: hydrolase activity, acting on glycosyl bonds, xyloglucan:xyloglucosyl transferase activity; INVOLVED IN: cell wall biogenesis; LOCATED IN: apoplast, cell wall; EXPRESSED IN: 11 plant structures; EXPRESSED DURING: 8 growth stages; CONTAINS InterPro DOMAIN/s: Xyloglucan endotransglucosylase/hydrolase (InterPro:IPR016455), Xyloglucan e…	AT3G44990	-1.2088	-0.534943	-1.34494	-0.472134	-1.0508	-1.07911	-0.563646	-1.09544	-0.909334	-1.53239	-1.46193	-1.77923	-1.1218	-0.155332		1	0.368499	0.00331835	0.521642	0.000431644	1	0.651475	0.0289429	0.0508071	4.47e-05	0.0253614	0.0117922	0.125322	1.12901
protein_coding	MLP-like protein 423	NA	MLP-like protein 423 (MLP423); INVOLVED IN: response to biotic stimulus, defense response; EXPRESSED IN: 22 plant structures; EXPRESSED DURING: 14 growth stages; CONTAINS InterPro DOMAIN/s: Bet v I allergen (InterPro:IPR000916); BEST Arabidopsis thaliana protein match is: MLP-like protein 28 (TAIR:AT1G70830.3).	AT1G24020	-0.365071	-0.63709	-0.312215	-0.845689	-1.28895	-0.552182	-0.716319	0.344115	-1.09311	-2.13276	-2.07301	-2.15116	0.31409	0.309358		1	0.119938	0.73025	0.262463	0.0137464	1	0.423038	0.797521	0.0598078	0.000944202	0.00284733	0.003875	1.06293	1.18504
protein_coding	NA	NA	unknown protein; FUNCTIONS IN: molecular_function unknown; INVOLVED IN: biological_process unknown; LOCATED IN: chloroplast; EXPRESSED IN: 19 plant structures; EXPRESSED DURING: 13 growth stages; Has 60 Blast hits to 60 proteins in 24 species: Archae - 0; Bacteria - 14; Metazoa - 0; Fungi - 0; Plants - 45; Viruses - 0; Other Eukaryotes - 1 (source: NCBI BLink).	AT5G62140	-1.3184	-1.22305	-0.508484	-0.665254	-0.737081	-1.14133	-0.66747	-0.374305	-0.953231	-0.829602	-1.67039	-1.73908	-0.686463	-0.552513		1	0.00407483	0.599459	0.699378	0.26877	1	0.543319	0.672827	0.516858	0.131306	0.0107799	0.0108926	0.434035	1.07806
protein_coding	Polyketide cyclase/dehydrase and lipid transport superfamily protein	NA	Polyketide cyclase/dehydrase and lipid transport superfamily protein; FUNCTIONS IN: copper ion binding; INVOLVED IN: response to cadmium ion, response to salt stress, defense response to bacterium; LOCATED IN: vacuole; EXPRESSED IN: 24 plant structures; EXPRESSED DURING: 14 growth stages; CONTAINS InterPro DOMAIN/s: Bet v I allergen (InterPro:IPR000916); BEST Arabidopsis thaliana protein match is…	AT4G23670	-1.09244	-1.25648	-0.466354	-0.261259	-0.417228	-1.86062	-0.966965	-0.502096	-0.110297	-0.783536	-1.73421	-2.31668	0.184747	0.133308		1	2.04e-05	0.697439	0.888888	0.31602	1	0.046326	0.583504	0.925232	0.328841	0.00793133	0.00170248	1.20195	1.20132
protein_coding	Copper amine oxidase family protein	NA	Copper amine oxidase family protein; FUNCTIONS IN: quinone binding, primary amine oxidase activity, copper ion binding; INVOLVED IN: oxidation reduction, amine metabolic process; LOCATED IN: endomembrane system; EXPRESSED IN: 9 plant structures; EXPRESSED DURING: 7 growth stages; CONTAINS InterPro DOMAIN/s: Copper amine oxidase, N-terminal (InterPro:IPR016182), Copper amine oxidase, N2/N3-termina…	AT1G31690	0.00461126	-0.0117711	-0.115692	0.472327	0.125758	-0.63975	-0.552123	-0.404784	-0.821595	-1.65398	-1.39868	-1.71995	-0.0248221	0.624669		1	1	0.932054	0.324487	0.880953	1	0.615955	0.617039	0.175724	1.72e-05	0.0323456	0.0138805	1.02501	0.549773
protein_coding	epithiospecifier modifier 1	A semidominant QTL which has an epistatic effect on the Epithiospecifier gene. Represses nitrile formation and favors isothiocyanate production during glucosinolate hydrolysis. The functional allele deters the insect herbivory T. ni.	epithiospecifier modifier 1 (ESM1); FUNCTIONS IN: hydrolase activity, acting on ester bonds, carboxylesterase activity; INVOLVED IN: glucosinolate catabolic process, response to cold, defense response to bacterium, response to insect; LOCATED IN: in 8 components; EXPRESSED IN: 21 plant structures; EXPRESSED DURING: 14 growth stages; CONTAINS InterPro DOMAIN/s: Lipase, GDSL (InterPro:IPR001087); B…	AT3G14210	-0.912973	0.344359	-0.0239066	-0.0927522	-0.19563	-0.815663	-0.162358	-0.385234	-0.748853	-0.87907	-0.72422	-1.75649	-0.0600429	-0.0630352		1	0.692157	1	1	0.504109	1	0.999376	0.454412	0.0198086	0.003085	0.268223	0.0106858	1.03427	0.959148
protein_coding	Fatty acid hydroxylase superfamily	Expression of the CER1 gene associated with production of stem epicuticular wax and pollen fertility. Biochemical studies showed that cer1 mutants are blocked in the conversion of stem wax C30 aldehydes to C29 alkanes, and they also lack the secondary alcohols and ketones. These suggested the CER1 protein is an aldehyde decarbonylase, but the exact molecular function of this protein remains to be…	ECERIFERUM 1 (CER1); FUNCTIONS IN: aldehyde decarbonylase activity; INVOLVED IN: aldehyde catabolic process, wax biosynthetic process, cuticle development; LOCATED IN: endoplasmic reticulum; EXPRESSED IN: 18 plant structures; EXPRESSED DURING: 13 growth stages; CONTAINS InterPro DOMAIN/s: Fatty acid hydroxylase (InterPro:IPR006694), Uncharacterised protein, Wax2 C-terminal (InterPro:IPR021940); B…	AT1G02205	-1.38976	0.123445	-0.164675	-0.374858	-1.11055	-1.10012	-0.00366098	-0.324211	-0.21874	-1.0477	-2.60546	-3.26168	-0.176617	-0.622594		1	1	0.938049	0.953062	0.00079635	1	0.965099	0.607228	0.954714	0.14403	0.000341463	0.000205882	1.09735	0.985891
protein_coding	cinnamyl alcohol dehydrogenase 9	NA	cinnamyl alcohol dehydrogenase 9 (CAD9); FUNCTIONS IN: oxidoreductase activity, zinc ion binding; INVOLVED IN: oxidation reduction; LOCATED IN: apoplast; EXPRESSED IN: 25 plant structures; EXPRESSED DURING: 15 growth stages; CONTAINS InterPro DOMAIN/s: GroES-like (InterPro:IPR011032), Alcohol dehydrogenase GroES-like (InterPro:IPR013154), Alcohol dehydrogenase, zinc-containing, conserved site (In…	AT4G39330	-0.98804	0.394379	-0.20882	-0.210887	-0.896355	-0.723531	0.41517	0.192753	0.657844	0.107223	-3.18702	-3.77472	-1.0962	-0.420047		1	0.446186	0.769504	0.900094	0.00116195	1	0.757123	0.858237	0.0333902	0.850769	5.88e-05	0	0.130578	1.13221
protein_coding	NA	NA	unknown protein; BEST Arabidopsis thaliana protein match is: unknown protein (TAIR:AT3G17580.1); Has 40 Blast hits to 40 proteins in 11 species: Archae - 0; Bacteria - 0; Metazoa - 0; Fungi - 0; Plants - 40; Viruses - 0; Other Eukaryotes - 0 (source: NCBI BLink).	AT1G48330	-0.187994	-0.141561	-0.688681	-0.711992	-1.23933	0.122218	0.509629	0.533405	0.305809	-0.163353	-2.73721	-3.04871	-0.14745	-0.568476		1	0.96717	0.223786	0.0968346	0.000291345	1	0.641169	0.380009	0.884148	0.997257	0.000181818	0.000309524	1.09516	1.15021
protein_coding	SAUR-like auxin-responsive protein family	Putative auxin-regulated protein whose expression is downregulated in response to chitin oligomers.	SAUR-like auxin-responsive protein family ; CONTAINS InterPro DOMAIN/s: Auxin responsive SAUR protein (InterPro:IPR003676); BEST Arabidopsis thaliana protein match is: SAUR-like auxin-responsive protein family (TAIR:AT4G38840.1); Has 1354 Blast hits to 1340 proteins in 28 species: Archae - 0; Bacteria - 0; Metazoa - 0; Fungi - 0; Plants - 1353; Viruses - 0; Other Eukaryotes - 1 (source: NCBI BLin…	AT2G21210	0.156828	0.0981089	-0.162222	-0.641607	-1.51122	0.218526	0.452921	0.335344	-0.141745	-0.330016	-2.38891	-3.55533	-0.255449	-0.704079		1	0.997216	0.890133	0.112715	2.63e-07	1	0.775171	0.639797	0.6121	0.527624	0.000793103	4.76e-05	1.06935	0.900955
protein_coding	Aldolase superfamily protein	NA	Aldolase superfamily protein; FUNCTIONS IN: fructose-bisphosphate aldolase activity; INVOLVED IN: glycolysis, metabolic process; EXPRESSED IN: 17 plant structures; EXPRESSED DURING: 11 growth stages; CONTAINS InterPro DOMAIN/s: Aldolase-type TIM barrel (InterPro:IPR013785), Fructose-bisphosphate aldolase, class-I (InterPro:IPR000741); BEST Arabidopsis thaliana protein match is: Aldolase superfami…	AT4G26530	0.107067	0.176973	0.123104	-0.109976	-0.690092	-0.0409244	-0.033645	0.0501324	0.0359443	-0.137106	-2.77287	-2.68827	-1.55389	-0.252727		1	0.721201	1	0.995937	9.51e-06	1	0.995045	0.986502	0.957869	1	0.000103448	0.000573333	0.0420811	1.12214
protein_coding	FASCICLIN-like arabinogalactan 2	AF333971 Arabidopsis thaliana fasciclin-like arabinogalactan-protein 2 (Fla2) mRNA, complete cds	FASCICLIN-like arabinogalactan 2 (FLA2); INVOLVED IN: response to cyclopentenone; LOCATED IN: anchored to plasma membrane, plasma membrane, anchored to membrane, membrane; EXPRESSED IN: 25 plant structures; EXPRESSED DURING: 13 growth stages; CONTAINS InterPro DOMAIN/s: FAS1 domain (InterPro:IPR000782); BEST Arabidopsis thaliana protein match is: FASCICLIN-like arabinogalactan 1 (TAIR:AT5G55730.2…	AT4G12730	0.0772251	1.04423	0.667661	0.0404632	-0.812488	0.295668	0.893409	0.786255	-0.0138346	-1.0729	-2.26261	-2.19593	0.346698	-0.265352		1	0.0120922	0.614791	1	0.00564238	1	0.222234	0.24632	0.818372	0.000606948	0.00151765	0.00357407	1.06226	1.07858
protein_coding	FASCICLIN-like arabinogalactan protein 8	NA	FASCICLIN-like arabinogalactan protein 8 (FLA8); LOCATED IN: anchored to plasma membrane, apoplast, plasma membrane, anchored to membrane, plant-type cell wall; EXPRESSED IN: 24 plant structures; EXPRESSED DURING: 14 growth stages; CONTAINS InterPro DOMAIN/s: FAS1 domain (InterPro:IPR000782); BEST Arabidopsis thaliana protein match is: FASCICLIN-like arabinogalactan-protein 10 (TAIR:AT3G60900.1);…	AT2G45470	0.216735	0.706528	0.0798658	0.364048	-0.910684	0.696728	0.469671	0.302186	0.11624	-0.946024	-2.26824	-2.74306	0.141135	-0.147099		1	0.0868425	0.998016	0.291055	0.00185143	1	0.719394	0.722978	0.96511	0.0164908	0.00138272	0.000558442	1.19981	1.0184
protein_coding	HAD superfamily, subfamily IIIB acid phosphatase	NA	HAD superfamily, subfamily IIIB acid phosphatase ; FUNCTIONS IN: acid phosphatase activity; INVOLVED IN: biological_process unknown; LOCATED IN: chloroplast, vacuole, membrane; EXPRESSED IN: 23 plant structures; EXPRESSED DURING: 13 growth stages; CONTAINS InterPro DOMAIN/s: Acid phosphatase (Class B) (InterPro:IPR005519), Vegetative storage protein/acid phosphatase (InterPro:IPR014403), Acid pho…	AT5G44020	0.417028	0.662306	-0.157058	0.153795	-1.00136	0.980397	0.951089	0.134746	0.735972	-0.481885	-2.50814	-3.11367	-0.0615559	-0.382809		1	0.122063	0.795434	1	8.06e-05	1	0.0973287	1	0.635894	0.582758	0.000488372	0.000317073	1.04507	1.15393
protein_coding	dehydration response element B1A	encodes a member of the DREB subfamily A-1 of ERF/AP2 transcription factor family (CBF3). The protein contains one AP2 domain. There are six members in this subfamily, including CBF1, CBF2, and CBF3. This gene is involved in response to low temperature and abscisic acid.	dehydration response element B1A (DREB1A); CONTAINS InterPro DOMAIN/s: DNA-binding, integrase-type (InterPro:IPR016177), Pathogenesis-related transcriptional factor/ERF, DNA-binding (InterPro:IPR001471); BEST Arabidopsis thaliana protein match is: C-repeat/DRE binding factor 2 (TAIR:AT4G25470.1); Has 30201 Blast hits to 17322 proteins in 780 species: Archae - 12; Bacteria - 1396; Metazoa - 17338;…	AT4G25480	0.187515	-0.290955	-0.996944	-1.0231	-1.90828	-0.134534	0.397522	-0.0270344	-0.232165	-1.11982	-2.59756	-2.85671	-0.0241092	-1.26537		1	0.766891	0.0477544	0.0535534	3.75e-06	1	0.794038	1	0.572014	0.0118769	0.000216216	0.000363636	1.04491	0.31775
protein_coding	NA	NA	unknown protein; BEST Arabidopsis thaliana protein match is: unknown protein (TAIR:AT1G69760.1); Has 47 Blast hits to 47 proteins in 13 species: Archae - 0; Bacteria - 0; Metazoa - 0; Fungi - 7; Plants - 34; Viruses - 0; Other Eukaryotes - 6 (source: NCBI BLink).	AT1G26920	-0.0222296	0.38232	-1.02763	-0.456541	-1.26179	0.225326	0.95528	-0.407084	-0.363997	-1.11613	-1.9109	-2.56926	-0.119924	-0.432244		1	0.601636	0.0708574	0.640833	7.17e-05	1	0.159149	0.58685	0.490825	0.0181029	0.00495808	0.000842697	1.09823	1.14842
protein_coding	GDSL-like Lipase/Acylhydrolase superfamily protein	NA	GDSL-like Lipase/Acylhydrolase superfamily protein; FUNCTIONS IN: hydrolase activity, acting on ester bonds, carboxylesterase activity; INVOLVED IN: lipid metabolic process; LOCATED IN: apoplast; EXPRESSED IN: 22 plant structures; EXPRESSED DURING: 14 growth stages; CONTAINS InterPro DOMAIN/s: Lipase, GDSL (InterPro:IPR001087); BEST Arabidopsis thaliana protein match is: GDSL-like Lipase/Acylhydr…	AT3G16370	-0.143533	0.572652	-0.692454	-0.525485	-0.895828	0.278916	1.15075	-0.493101	-0.493279	-0.683833	-2.28989	-3.26816	-0.58481	-0.43334		1	0.650775	0.2336	0.458689	1.38e-12	1	0.185215	0.382392	0.302926	0.21916	0.00125974	6.45e-05	0.61291	1.16183
protein_coding	expansin 11	member of Alpha-Expansin Gene Family. Naming convention from the Expansin Working Group (Kende et al, 2004. Plant Mol Bio)	expansin 11 (EXPA11); INVOLVED IN: plant-type cell wall modification involved in multidimensional cell growth, unidimensional cell growth, plant-type cell wall loosening; LOCATED IN: cell wall; EXPRESSED IN: 14 plant structures; EXPRESSED DURING: 9 growth stages; CONTAINS InterPro DOMAIN/s: Barwin-related endoglucanase (InterPro:IPR009009), Pollen allergen, N-terminal (InterPro:IPR014734), Expans…	AT1G20190	0.31855	0.36137	-0.32222	-0.302126	-1.55817	0.531809	0.604646	0.105951	-0.122756	-0.666908	-2.96157	-3.69651	-1.3876	-1.0067		1	0.613541	0.603952	0.680806	5.89e-06	1	0.589396	0.878175	0.602871	0.371728	0.000105263	0	0.0579848	0.514178
protein_coding	proline-rich protein 4	Encodes one of four proline-rich proteins in Arabidopsis which are predicted to localize to the cell wall. Transcripts are most abundant in aerial organs of the plant.	proline-rich protein 4 (PRP4); CONTAINS InterPro DOMAIN/s: Pollen Ole e 1 allergen/extensin (InterPro:IPR006041); BEST Arabidopsis thaliana protein match is: proline-rich protein 2 (TAIR:AT2G21140.1); Has 142477 Blast hits to 44863 proteins in 2266 species: Archae - 463; Bacteria - 33947; Metazoa - 50713; Fungi - 14839; Plants - 19672; Viruses - 4087; Other Eukaryotes - 18756 (source: NCBI BLink).	AT4G38770	0.244756	0.6508	-0.0609934	-0.0133488	-1.02882	0.516597	0.435964	-0.123533	-0.030619	-1.13372	-2.21383	-3.68594	-0.248842	-0.0653381		1	0.0819949	0.893228	0.932497	2.39e-10	1	0.796319	0.881291	1	0.0149767	0.001625	0	1.10014	0.958845
protein_coding	xyloglucan endotransglucosylase/hydrolase 7	NA	xyloglucan endotransglucosylase/hydrolase 7 (XTH7); FUNCTIONS IN: hydrolase activity, acting on glycosyl bonds, xyloglucan:xyloglucosyl transferase activity, hydrolase activity, hydrolyzing O-glycosyl compounds; INVOLVED IN: carbohydrate metabolic process, cellular glucan metabolic process; LOCATED IN: endomembrane system, cell wall, apoplast; EXPRESSED IN: 17 plant structures; EXPRESSED DURING: …	AT4G37800	0.527885	-0.234297	-0.232036	-0.276133	-1.11308	0.157216	0.0410508	-0.122307	-0.44287	-1.39142	-2.86734	-3.57794	-0.676575	-0.333004		1	0.633744	0.738997	0.777954	1.54e-05	1	1	0.737922	0.276495	2.63e-07	0.000130435	4.35e-05	0.474172	1.12294
protein_coding	ralf-like 24	Member of a diversely expressed predicted peptide family showing sequence similarity to tobacco Rapid Alkalinization Factor (RALF), and is believed to play an essential role in the physiology of Arabidopsis. Consists of a single exon and is characterized by a conserved C-terminal motif and N-terminal signal peptide.	ralf-like 24 (RALFL24); CONTAINS InterPro DOMAIN/s: Rapid ALkalinization Factor (InterPro:IPR008801); BEST Arabidopsis thaliana protein match is: ralf-like 31 (TAIR:AT4G13950.1); Has 244 Blast hits to 244 proteins in 20 species: Archae - 0; Bacteria - 0; Metazoa - 0; Fungi - 2; Plants - 242; Viruses - 0; Other Eukaryotes - 0 (source: NCBI BLink).	AT3G23805	0.303878	-0.363649	-0.447286	-0.353348	-1.04091	1.21914	0.025733	0.430943	0.17105	-0.51649	-2.19265	-2.20892	0.0845824	-0.531691		1	0.802085	0.393656	0.672024	0.00309773	1	0.987327	0.391694	0.969909	0.610846	0.00162222	0.00274101	1.16572	1.15545
protein_coding	SAUR-like auxin-responsive protein family	NA	SMALL AUXIN UPREGULATED 68 (SAUR68); CONTAINS InterPro DOMAIN/s: Auxin responsive SAUR protein (InterPro:IPR003676); BEST Arabidopsis thaliana protein match is: SAUR-like auxin-responsive protein family (TAIR:AT1G29500.1); Has 748 Blast hits to 732 proteins in 21 species: Archae - 0; Bacteria - 0; Metazoa - 0; Fungi - 0; Plants - 748; Viruses - 0; Other Eukaryotes - 0 (source: NCBI BLink).	AT1G29510	0.355338	-0.0717614	-0.351091	-0.463837	-1.42923	0.893129	0.407078	0.50841	0.739699	-0.176893	-2.14533	-2.73615	-0.249013	-0.537516		1	0.957001	0.550878	0.808554	0.00387054	1	0.775672	0.482052	0.454104	0.784328	0.00201961	0.000493151	1.09579	1.14873
protein_coding	AtBS1(activation-tagged BRI1 suppressor 1)-interacting factor 1	NA	AtBS1(activation-tagged BRI1 suppressor 1)-interacting factor 1 (AIF1); BEST Arabidopsis thaliana protein match is: basic helix-loop-helix (bHLH) DNA-binding superfamily protein (TAIR:AT1G09250.1); Has 150 Blast hits to 150 proteins in 12 species: Archae - 0; Bacteria - 0; Metazoa - 0; Fungi - 0; Plants - 150; Viruses - 0; Other Eukaryotes - 0 (source: NCBI BLink).	AT3G05800	0.598687	-0.150315	-0.58804	-0.820842	-1.53265	1.06353	0.380421	0.114118	-0.0550886	-0.799517	-2.19267	-2.76784	-0.49452	-0.535979		1	0.860194	0.408762	0.0922675	3.27e-06	1	0.809968	0.836529	0.704691	0.150043	0.00161798	0.000432836	0.80467	1.13299
protein_coding	extensin-like protein	extensin-like protein (ELP)	extensin-like protein (ELP); FUNCTIONS IN: lipid binding; INVOLVED IN: lipid transport; LOCATED IN: endomembrane system; EXPRESSED IN: 22 plant structures; EXPRESSED DURING: 13 growth stages; CONTAINS InterPro DOMAIN/s: Bifunctional inhibitor/plant lipid transfer protein/seed storage (InterPro:IPR016140), Plant lipid transfer protein/seed storage/trypsin-alpha amylase inhibitor (InterPro:IPR00361…	AT1G12090	0.367014	-0.174214	-0.72051	0.088331	-0.830774	0.553742	-0.220221	-0.662105	-0.0174185	-1.0774	-1.82109	-2.96095	-0.10103	-0.0912257		1	0.694074	0.130244	0.853578	0.000200187	1	0.851404	0.134364	0.90763	0.00432378	0.0062878	0.000311111	1.05821	0.969329
protein_coding	NA	NA	unknown protein; FUNCTIONS IN: molecular_function unknown; INVOLVED IN: biological_process unknown; LOCATED IN: endomembrane system; EXPRESSED IN: 21 plant structures; EXPRESSED DURING: 13 growth stages; Has 14 Blast hits to 14 proteins in 4 species: Archae - 0; Bacteria - 0; Metazoa - 0; Fungi - 0; Plants - 14; Viruses - 0; Other Eukaryotes - 0 (source: NCBI BLink).	AT5G03120	-0.149727	-0.463968	-0.396962	0.0793616	-1.05506	0.334055	0.0245297	-0.442749	-0.16125	-1.1916	-1.68887	-1.96846	-0.350505	-0.194954		1	0.415075	0.602516	1	0.0082419	1	1	0.730788	0.827195	0.00645376	0.0119028	0.00658108	1.00627	1.07152
protein_coding	GDSL-like Lipase/Acylhydrolase superfamily protein	NA	GDSL-like Lipase/Acylhydrolase superfamily protein; FUNCTIONS IN: hydrolase activity, acting on ester bonds, carboxylesterase activity; INVOLVED IN: lipid metabolic process; LOCATED IN: endomembrane system; EXPRESSED IN: 17 plant structures; EXPRESSED DURING: 13 growth stages; CONTAINS InterPro DOMAIN/s: Lipase, GDSL (InterPro:IPR001087); BEST Arabidopsis thaliana protein match is: Li-tolerant li…	AT4G28780	-0.779399	1.36132	-0.660913	-0.367554	-1.84962	0.536526	1.54632	-0.237674	0.311168	-1.14822	-2.10081	-2.50222	-1.00302	-0.765032		1	3.05e-05	0.357805	0.678717	3.48e-08	1	0.00130707	0.704198	0.701193	0.0390137	0.00250806	0.00148649	0.187746	1.02881
protein_coding	beta HLH protein 71	NA	beta HLH protein 71 (bHLH071); FUNCTIONS IN: DNA binding, sequence-specific DNA binding transcription factor activity; INVOLVED IN: regulation of transcription; LOCATED IN: nucleus; EXPRESSED IN: 16 plant structures; EXPRESSED DURING: 13 growth stages; CONTAINS InterPro DOMAIN/s: Helix-loop-helix DNA-binding domain (InterPro:IPR001092), Helix-loop-helix DNA-binding (InterPro:IPR011598); BEST Arab…	AT5G46690	-1.69106	0.08052	-0.51775	-0.779327	-1.72495	-0.00459158	0.544024	-0.284958	-0.185462	-2.16458	-2.38775	-2.77421	0.198211	-0.872001		1	0.923333	0.386495	0.366916	0.00196685	1	0.634137	0.637865	0.845325	0.000901093	0.000777778	0.000441176	1.20638	0.756585
protein_coding	SAUR-like auxin-responsive protein family	NA	SAUR-like auxin-responsive protein family ; CONTAINS InterPro DOMAIN/s: Auxin responsive SAUR protein (InterPro:IPR003676); BEST Arabidopsis thaliana protein match is: SAUR-like auxin-responsive protein family (TAIR:AT5G27780.1); Has 636 Blast hits to 622 proteins in 19 species: Archae - 0; Bacteria - 0; Metazoa - 0; Fungi - 0; Plants - 636; Viruses - 0; Other Eukaryotes - 0 (source: NCBI BLink).	AT1G29430	0.202473	-0.236432	-0.855883	-0.0547978	-2.32612	0.242203	0.0515668	0.454316	0.484306	-0.885722	-1.41117	-0.868641	-1.96443	-0.852324		1	0.688126	0.211951	1	0.000176864	1	0.995611	0.699632	0.938839	0.200128	0.0267817	0.178482	0.0128889	0.770787
protein_coding	disease resistance protein (TIR-NBS-LRR class) family	Encodes a TIR-NB-LRR resistance protein. Transient expression in tobacco induces cell death.	disease resistance protein (TIR-NBS-LRR class) family; FUNCTIONS IN: transmembrane receptor activity, ATP binding; INVOLVED IN: defense response signaling pathway, resistance gene-dependent, defense response; LOCATED IN: intrinsic to membrane; EXPRESSED IN: 18 plant structures; EXPRESSED DURING: 9 growth stages; CONTAINS InterPro DOMAIN/s: NB-ARC (InterPro:IPR002182), Toll-Interleukin receptor (I…	AT4G19530	0.517663	-0.105821	-0.31395	0.26039	-0.699335	-0.0186702	-0.122512	-0.695384	-0.62226	-1.3791	-1.42877	-1.25562	-1.51874	-0.432924		1	1	0.838438	0.880578	0.158363	1	1	0.252749	0.375266	0.00375001	0.0252187	0.0509522	0.0487674	1.15326
protein_coding	galacturonosyltransferase 6	Encodes a protein with putative galacturonosyltransferase activity.	galacturonosyltransferase 6 (GATL6); FUNCTIONS IN: transferase activity, transferring hexosyl groups, polygalacturonate 4-alpha-galacturonosyltransferase activity, transferase activity, transferring glycosyl groups; INVOLVED IN: carbohydrate biosynthetic process; LOCATED IN: endomembrane system; EXPRESSED IN: 22 plant structures; EXPRESSED DURING: 13 growth stages; CONTAINS InterPro DOMAIN/s: Gly…	AT4G02130	0.590922	0.389009	-0.580018	0.447098	-0.730448	0.860304	0.396701	-0.421277	-0.276499	-1.01461	-1.42526	-1.31644	0.185254	-0.451672		1	0.567673	0.298458	0.431731	0.0375143	1	0.883903	0.398766	0.84516	0.0047353	0.0269668	0.0439012	1.20185	1.1219
protein_coding	BURP domain-containing protein	responsive to dehydration 22 (RD22) mediated by ABA	RESPONSIVE TO DESSICATION 22 (RD22); FUNCTIONS IN: nutrient reservoir activity; INVOLVED IN: response to desiccation, response to salt stress, response to abscisic acid stimulus; LOCATED IN: endomembrane system; EXPRESSED IN: 21 plant structures; EXPRESSED DURING: 13 growth stages; CONTAINS InterPro DOMAIN/s: BURP (InterPro:IPR004873); BEST Arabidopsis thaliana protein match is: unknown seed prot…	AT5G25610	-0.595122	0.088868	0.178442	-0.215596	-1.18684	-0.457306	0.168589	-0.258685	-0.422601	-1.24646	-1.08883	-2.20192	-0.14259	-0.0963142		1	0.984138	0.839711	1	8.62e-05	1	1	0.777275	0.877205	0.0168283	0.0735654	0.00288811	1.07812	1.02248
protein_coding	early nodulin-like protein 2	NA	early nodulin-like protein 2 (ENODL2); FUNCTIONS IN: electron carrier activity, copper ion binding; LOCATED IN: in 6 components; EXPRESSED IN: 24 plant structures; EXPRESSED DURING: 13 growth stages; CONTAINS InterPro DOMAIN/s: Plastocyanin-like (InterPro:IPR003245), Cupredoxin (InterPro:IPR008972); BEST Arabidopsis thaliana protein match is: early nodulin-like protein 1 (TAIR:AT5G53870.1); Has 1…	AT4G27520	-0.271434	0.0171446	0.0920539	0.165325	-1.0278	0.0507307	-0.127617	-0.0686595	-0.316847	-1.29168	-1.64759	-1.90982	-0.206876	-0.231726		1	1	0.82962	0.747851	2.14e-08	1	0.914702	0.976506	1	0.000234027	0.0135142	0.00789113	1.09785	1.16193
protein_coding	S-adenosyl-l-homocysteine (SAH) hydrolase 2	NA	S-adenosyl-l-homocysteine (SAH) hydrolase 2 (SAHH2); FUNCTIONS IN: adenosylhomocysteinase activity; INVOLVED IN: one-carbon metabolic process; LOCATED IN: plasma membrane, vacuole, membrane; EXPRESSED IN: 33 plant structures; EXPRESSED DURING: 15 growth stages; CONTAINS InterPro DOMAIN/s: S-adenosyl-L-homocysteine hydrolase (InterPro:IPR000043), S-adenosyl-L-homocysteine hydrolase, conserved site…	AT3G23810	-0.776119	0.421088	-0.178024	0.00101084	-0.528832	-0.0187268	0.129769	-0.138138	-0.248099	-0.94716	-1.36176	-1.33233	-0.0106065	-0.180338		1	0.537968	0.788682	0.923098	0.00105418	1	1	0.792631	0.952983	0.0214289	0.0357175	0.0457655	1.01792	1.1522
protein_coding	glutathione S-transferase TAU 20	Encodes glutathione transferase belonging to the tau class of GSTs. Naming convention according to Wagner et al. (2002).	glutathione S-transferase TAU 20 (GSTU20); FUNCTIONS IN: glutathione transferase activity; INVOLVED IN: toxin catabolic process; LOCATED IN: apoplast, chloroplast, cytoplasm; EXPRESSED IN: 23 plant structures; EXPRESSED DURING: 15 growth stages; CONTAINS InterPro DOMAIN/s: Thioredoxin fold (InterPro:IPR012335), Glutathione S-transferase, C-terminal (InterPro:IPR004046), Glutathione S-transferase,…	AT1G78370	-0.347671	0.340496	-0.579664	0.0813036	-1.09638	-0.466687	-0.0304243	-0.474019	-0.47198	-1.03712	-1.64272	-1.5089	0.246468	1.23647		1	0.686988	0.381524	0.835365	0.000399318	1	1	0.387049	0.576505	0.00361189	0.0129105	0.0264234	1.17703	0.0886932
protein_coding	GDSL-like Lipase/Acylhydrolase superfamily protein	NA	GDSL-like Lipase/Acylhydrolase superfamily protein; CONTAINS InterPro DOMAIN/s: Lipase, GDSL, active site (InterPro:IPR008265), Lipase, GDSL (InterPro:IPR001087); BEST Arabidopsis thaliana protein match is: SGNH hydrolase-type esterase superfamily protein (TAIR:AT1G75880.2); Has 3444 Blast hits to 3405 proteins in 204 species: Archae - 0; Bacteria - 282; Metazoa - 0; Fungi - 26; Plants - 3125; Vi…	AT1G75900	-0.886715	-0.983621	-1.12998	-0.044099	-0.982425	-0.739479	-0.500989	-0.806163	-0.330275	-0.992739	-1.47957	-1.78775	0.247574	-0.4586		1	0.0033861	0.0070051	0.992242	0.012901	1	0.674971	0.0642681	0.433559	0.0334641	0.0221553	0.0101071	0.992185	1.15158
protein_coding	S-adenosyl-L-methionine-dependent methyltransferases superfamily protein	NA	early-responsive to dehydration 3 (ERD3); CONTAINS InterPro DOMAIN/s: Protein of unknown function DUF248, methyltransferase putative (InterPro:IPR004159); BEST Arabidopsis thaliana protein match is: S-adenosyl-L-methionine-dependent methyltransferases superfamily protein (TAIR:AT1G31850.2); Has 1146 Blast hits to 1130 proteins in 105 species: Archae - 6; Bacteria - 157; Metazoa - 0; Fungi - 3; Pl…	AT4G19120	-0.548768	-0.278093	-0.872199	-0.210849	-0.960278	-0.550836	0.0958419	-0.583251	-0.522478	-1.30204	-1.62373	-1.64466	-0.16685	-0.173019		1	0.725363	0.0703834	0.831771	0.00183084	1	0.960322	0.34339	0.290409	0.000210576	0.0129487	0.0152473	1.08422	0.986351
protein_coding	NA	NA	unknown protein; BEST Arabidopsis thaliana protein match is: unknown protein (TAIR:AT3G09950.1); Has 30201 Blast hits to 17322 proteins in 780 species: Archae - 12; Bacteria - 1396; Metazoa - 17338; Fungi - 3422; Plants - 5037; Viruses - 0; Other Eukaryotes - 2996 (source: NCBI BLink).	AT5G55620	-0.399004	-0.380601	-0.991263	-0.415149	-0.702306	-0.308519	0.0742445	-0.629553	0.136337	-0.640071	-1.10706	-1.71148	-2.20286	-1.04297		1	0.238757	0.0794819	0.578729	0.00801206	1	1	0.556864	0.963459	0.218345	0.0732658	0.0121302	0.004	0.499941
protein_coding	outer plastid envelope protein 16-1	Encodes AtOEP16, a 16-KDa plastid outer membrane protein involved in plastid import of protochlorophyllide oxidoreductase A. Predominantly expressed in leaves and is also inducible by cold treatment.	outer plastid envelope protein 16-1 (OEP16-1); FUNCTIONS IN: protein transporter activity, P-P-bond-hydrolysis-driven protein transmembrane transporter activity; INVOLVED IN: in 7 processes; LOCATED IN: chloroplast, plastid outer membrane, vacuole, chloroplast envelope; EXPRESSED IN: 22 plant structures; EXPRESSED DURING: 13 growth stages; CONTAINS InterPro DOMAIN/s: Mitochondrial inner membrane …	AT2G28900	-0.886043	-0.41841	-0.364946	-0.233752	-0.553231	8.15e-05	-0.125639	-0.24	-0.152677	-0.552579	-1.35259	-1.52462	-0.237751	0.0461608		1	0.294577	0.584152	0.770758	0.0193586	1	0.960197	0.714934	1	0.00895058	0.0331434	0.0219977	1.09921	1.14742
protein_coding	Single hybrid motif superfamily protein	NA	Single hybrid motif superfamily protein; FUNCTIONS IN: glycine dehydrogenase (decarboxylating) activity; INVOLVED IN: glycine catabolic process, glycine decarboxylation via glycine cleavage system; LOCATED IN: mitochondrion, glycine cleavage complex, chloroplast; EXPRESSED IN: 23 plant structures; EXPRESSED DURING: 13 growth stages; CONTAINS InterPro DOMAIN/s: 2-oxo acid dehydrogenase, lipoyl-bin…	AT1G32470	-0.447302	-0.202377	-0.51726	-0.336538	-0.484425	-0.474082	-0.00937942	-0.220362	-0.257566	-0.69816	-2.06191	-1.84502	-0.2536	-0.0224875		1	0.731338	0.439056	0.336907	0.00115766	1	1	0.745037	0.65383	0.0073359	0.00245763	0.00826459	1.08871	0.975764
protein_coding	RING/FYVE/PHD zinc finger superfamily protein	Encodes SHA1 (shoot apical meristem arrest), a putative E3 ligase (a RING finger protein) required for post-embryonic SAM maintenance. The mutant sha1-1 shows a primary SAM-deficient phenotype at the adult stage.	shoot apical meristem arrest 1 (SHA1); FUNCTIONS IN: zinc ion binding; INVOLVED IN: maintenance of shoot apical meristem identity, meristem development; EXPRESSED IN: 23 plant structures; EXPRESSED DURING: 13 growth stages; CONTAINS InterPro DOMAIN/s: Zinc finger, RING-CH-type (InterPro:IPR011016); BEST Arabidopsis thaliana protein match is: RING/FYVE/PHD zinc finger superfamily protein (TAIR:AT5…	AT5G63780	-0.839852	-0.0518931	-0.747979	-0.373457	-1.00321	-0.400018	-0.0406842	-0.589019	-0.41772	-0.555499	-2.14187	-1.68574	-0.767873	-0.293999		1	0.993533	0.220076	0.495114	0.000125203	1	1	0.370944	0.488975	0.138261	0.00189	0.0130121	0.341135	1.06508
protein_coding	ATP synthase delta-subunit gene	Encodes the chloroplast ATPase delta-subunit.	ATP synthase delta-subunit gene (ATPD); FUNCTIONS IN: hydrogen ion transporting ATP synthase activity, rotational mechanism; INVOLVED IN: response to cold, defense response to bacterium, photosynthetic electron transport in photosystem I, photosynthetic electron transport in photosystem II, photosynthesis; LOCATED IN: in 7 components; EXPRESSED IN: 24 plant structures; EXPRESSED DURING: 14 growth…	AT4G09650	-0.104593	0.426432	-0.901365	-0.396157	-0.906071	-0.182988	0.768477	-0.464012	-0.390486	-0.872373	-1.31697	-1.71326	-0.135476	-0.112588		1	0.393893	0.0560435	0.316545	1.19e-09	1	0.163205	0.364891	0.289575	0.000170026	0.0391232	0.0120918	1.08337	1.03219
protein_coding	F-box and associated interaction domains-containing protein	NA	F-box and associated interaction domains-containing protein; FUNCTIONS IN: molecular_function unknown; INVOLVED IN: biological_process unknown; LOCATED IN: nucleus; EXPRESSED IN: 16 plant structures; EXPRESSED DURING: 10 growth stages; CONTAINS InterPro DOMAIN/s: F-box domain, cyclin-like (InterPro:IPR001810), F-box domain, Skp2-like (InterPro:IPR022364), F-box associated domain, type 3 (InterPro…	AT3G23880	-0.123755	0.222606	-0.535081	-0.580081	-1.45418	-0.0254358	0.467904	-0.572082	-0.502125	-1.12512	-1.2752	-1.33866	-0.536157	0.0708912		1	0.919704	0.377391	0.407227	0.000854385	1	0.847145	0.335477	0.377207	0.00127552	0.0413495	0.0385987	0.707044	1.12698
protein_coding	xyloglucan endotransglucosylase/hydrolase 9	encodes a member of xyloglucan endotransglucosylase/hydrolases (XTHs) that catalyze the cleavage and molecular grafting of xyloglucan chains function in loosening and rearrangement of the cell wall. Gene is expressed in shoot apex region, flower buds, flower stalks and internodes bearing flowers.	xyloglucan endotransglucosylase/hydrolase 9 (XTH9); FUNCTIONS IN: hydrolase activity, acting on glycosyl bonds, xyloglucan:xyloglucosyl transferase activity; INVOLVED IN: carbohydrate metabolic process, cellular glucan metabolic process; LOCATED IN: apoplast, cell wall; EXPRESSED IN: 27 plant structures; EXPRESSED DURING: 13 growth stages; CONTAINS InterPro DOMAIN/s: Xyloglucan endotransglucosyla…	AT4G03210	-0.237908	0.0888964	0.0240877	-0.756366	-1.19328	0.406487	-0.234495	0.521584	-0.293615	-1.13758	-2.09873	-2.12153	-0.81617	-0.46407		1	1	0.868497	0.287367	0.0470858	1	0.900278	0.755888	0.598284	0.000989359	0.00234211	0.00394118	0.301612	1.12136
protein_coding	SAUR-like auxin-responsive protein family	NA	SAUR-like auxin-responsive protein family ; FUNCTIONS IN: molecular_function unknown; INVOLVED IN: response to auxin stimulus, response to cold; LOCATED IN: plasma membrane; EXPRESSED IN: 21 plant structures; EXPRESSED DURING: 13 growth stages; CONTAINS InterPro DOMAIN/s: Auxin responsive SAUR protein (InterPro:IPR003676); BEST Arabidopsis thaliana protein match is: SAUR-like auxin-responsive pro…	AT4G38840	0.517441	0.166376	-0.0675326	-0.227607	-1.44779	0.663641	0.640858	0.447554	-0.0242658	-1.18471	-2.29449	-2.21357	-1.02413	-0.429504		1	0.918661	0.915562	0.78369	1.98e-05	1	0.581395	0.369645	0.697174	0.0080794	0.00111842	0.00292199	0.159717	1.12963
protein_coding	expansin A5	Encodes an expansin. Naming convention from the Expansin Working Group (Kende et al, 2004. Plant Mol Bio)	expansin A5 (EXPA5); INVOLVED IN: plant-type cell wall modification involved in multidimensional cell growth, unidimensional cell growth, plant-type cell wall loosening; LOCATED IN: endomembrane system, extracellular region; EXPRESSED IN: 21 plant structures; EXPRESSED DURING: 13 growth stages; CONTAINS InterPro DOMAIN/s: Pollen allergen, N-terminal (InterPro:IPR014734), Rare lipoprotein A (Inter…	AT3G29030	0.0574841	0.246111	-0.250705	-0.0740137	-0.997654	0.465025	0.358201	0.0942033	-0.243936	-1.29049	-2.01088	-2.49036	-0.59528	-0.656649		1	0.748294	0.644699	1	0.00706899	1	0.871559	0.902229	0.573801	0.0619128	0.00338816	0.00113131	0.579527	1.07114
protein_coding	NA	NA	unknown protein; Has 30201 Blast hits to 17322 proteins in 780 species: Archae - 12; Bacteria - 1396; Metazoa - 17338; Fungi - 3422; Plants - 5037; Viruses - 0; Other Eukaryotes - 2996 (source: NCBI BLink).	AT4G33660	0.149256	-0.0139089	-0.19473	-0.105974	-1.55323	0.296412	-0.00746005	-0.288452	0.0246564	-0.923686	-2.23556	-1.905	-1.05992	-0.677881		1	1	0.829097	0.938688	4.95e-14	1	1	0.581409	1	0.000164878	0.00125317	0.00660633	0.159904	1.04323
protein_coding	plastid-specific 50S ribosomal protein 6	plastid-specific ribosomal protein 6 precursor (Psrp-6) - like	plastid-specific 50S ribosomal protein 6 (PSRP6); FUNCTIONS IN: structural constituent of ribosome, rRNA binding; INVOLVED IN: translation; LOCATED IN: chloroplast; EXPRESSED IN: 23 plant structures; EXPRESSED DURING: 13 growth stages; CONTAINS InterPro DOMAIN/s: Ribosomal protein L6, chloroplast (InterPro:IPR020526); Has 30201 Blast hits to 17322 proteins in 780 species: Archae - 12; Bacteria - …	AT5G17870	0.478532	0.0519889	-0.321556	-0.436662	-1.5391	0.781538	0.284615	0.289257	-0.150387	-1.08134	-1.43433	-1.15171	-0.151452	0.00740227		1	1	0.686148	0.48906	5.04e-08	1	0.867397	0.705052	0.684417	0.0189182	0.0245505	0.0713585	1.08828	1.04747
protein_coding	methyl esterase 18	Encodes a protein shown to have methyl IAA esterase activity in vitro. This protein does not act on methyl JA, MeSA, MeGA4, or MEGA9 in vitro.	methyl esterase 18 (MES18); CONTAINS InterPro DOMAIN/s: Alpha/beta hydrolase fold-1 (InterPro:IPR000073); BEST Arabidopsis thaliana protein match is: methyl esterase 16 (TAIR:AT4G16690.1); Has 1807 Blast hits to 1807 proteins in 277 species: Archae - 0; Bacteria - 0; Metazoa - 736; Fungi - 347; Plants - 385; Viruses - 0; Other Eukaryotes - 339 (source: NCBI BLink).	AT5G58310	0.49828	0.257168	-0.166636	-0.327325	-1.13782	0.707029	0.0361689	-0.122167	-0.555098	-0.964796	-1.4572	-1.59638	-0.242522	-0.0570742		1	0.88308	0.799799	0.866144	7.84e-05	1	1	0.857082	0.634652	0.0194126	0.0201769	0.0163108	1.08596	0.925912
protein_coding	Rhodanese/Cell cycle control phosphatase superfamily protein	NA	Rhodanese/Cell cycle control phosphatase superfamily protein; FUNCTIONS IN: molecular_function unknown; INVOLVED IN: biological_process unknown; LOCATED IN: chloroplast; EXPRESSED IN: 21 plant structures; EXPRESSED DURING: 13 growth stages; CONTAINS InterPro DOMAIN/s: Rhodanese-like (InterPro:IPR001763); BEST Arabidopsis thaliana protein match is: Rhodanese/Cell cycle control phosphatase superfam…	AT3G08920	0.518376	0.17751	-0.222152	-0.424402	-0.818489	0.311206	0.135516	0.0627954	-0.224117	-0.770581	-1.82952	-2.03889	-0.289459	-0.300605		1	0.810984	0.774023	0.41828	0.0012411	1	1	0.965751	0.487715	0.13427	0.00673832	0.00492896	1.06081	1.0738
protein_coding	NA	NA	FUNCTIONS IN: molecular_function unknown; INVOLVED IN: biological_process unknown; LOCATED IN: chloroplast outer membrane, thylakoid, chloroplast thylakoid membrane, chloroplast, chloroplast envelope; EXPRESSED IN: 21 plant structures; EXPRESSED DURING: 13 growth stages; BEST Arabidopsis thaliana protein match is: outer envelope membrane protein 7 (TAIR:AT3G52420.1); Has 26 Blast hits to 26 prote…	AT3G63160	0.268529	-0.154736	-0.197807	-0.161864	-1.34496	0.484981	0.0533825	-0.050461	-0.0794834	-0.983794	-1.54602	-1.85002	-0.255538	-0.0530566		1	0.824024	0.831862	0.842468	4.76e-41	1	0.996076	0.989029	0.992246	5.22e-08	0.0194751	0.0082874	1.08672	0.9944
protein_coding	Protein of unknown function (DUF1118)	NA	FUNCTIONS IN: molecular_function unknown; INVOLVED IN: response to karrikin; LOCATED IN: thylakoid, chloroplast thylakoid membrane, chloroplast; EXPRESSED IN: 21 plant structures; EXPRESSED DURING: 13 growth stages; CONTAINS InterPro DOMAIN/s: Protein of unknown function DUF1118 (InterPro:IPR009500), Uncharacterised conserved protein UCP022207 (InterPro:IPR016801); Has 78 Blast hits to 78 protein…	AT5G08050	0.353887	0.18516	-0.518959	-0.521693	-1.62723	0.262828	0.46442	0.0267636	-0.000502817	-1.12881	-1.83579	-2.16531	-0.145771	-0.204354		1	0.820715	0.381524	0.187498	1.16e-09	1	0.696968	0.945286	0.922815	0.0223721	0.00654028	0.00337013	1.08102	1.12291
protein_coding	early nodulin-like protein 19	NA	early nodulin-like protein 19 (ENODL19); FUNCTIONS IN: electron carrier activity, copper ion binding; EXPRESSED IN: 22 plant structures; EXPRESSED DURING: 13 growth stages; CONTAINS InterPro DOMAIN/s: Plastocyanin-like (InterPro:IPR003245), Cupredoxin (InterPro:IPR008972); BEST Arabidopsis thaliana protein match is: early nodulin-like protein 17 (TAIR:AT5G15350.1).	AT4G12880	0.446163	0.0722424	-0.366898	-0.387567	-1.29612	0.0088717	0.239876	-0.00749275	-0.313691	-1.28827	-2.0211	-1.56051	-0.245534	-0.21437		1	0.989448	0.532492	0.43076	5.01e-08	1	0.903335	1	0.423414	0.0122771	0.00284672	0.0198173	1.1003	1.07903
protein_coding	NA	NA	unknown protein; FUNCTIONS IN: molecular_function unknown; INVOLVED IN: biological_process unknown; LOCATED IN: endomembrane system; EXPRESSED IN: 19 plant structures; EXPRESSED DURING: 12 growth stages; Has 52145 Blast hits to 9983 proteins in 837 species: Archae - 70; Bacteria - 23777; Metazoa - 15204; Fungi - 1872; Plants - 6370; Viruses - 647; Other Eukaryotes - 4205 (source: NCBI BLink).	AT1G11850	-0.0766535	-0.0670074	-0.187162	-0.415858	-1.49263	0.0734567	-0.256068	0.201027	0.088439	-1.46642	-1.34172	-1.40302	-0.377109	-0.415974		1	1	0.761007	0.348318	3.41e-05	1	0.906086	0.822356	0.870176	0.000849342	0.0391426	0.0407696	0.980859	1.05897
protein_coding	Stress responsive A/B Barrel Domain	NA	Stress responsive A/B Barrel Domain; FUNCTIONS IN: molecular_function unknown; INVOLVED IN: biological_process unknown; LOCATED IN: chloroplast; EXPRESSED IN: 22 plant structures; EXPRESSED DURING: 13 growth stages; CONTAINS InterPro DOMAIN/s: Stress responsive alpha-beta barrel (InterPro:IPR013097), Dimeric alpha-beta barrel (InterPro:IPR011008); BEST Arabidopsis thaliana protein match is: heat …	AT5G22580	0.526847	0.140618	0.0146016	0.208071	-1.20972	0.416653	0.108673	0.271582	0.00575707	-1.21685	-1.30762	-1.72453	-0.376953	-0.348042		1	0.839047	0.997801	0.850562	0.000349544	1	0.967654	0.579937	0.752892	0.00165739	0.0391928	0.0114389	0.981334	1.15699
protein_coding	Translation elongation factor EF1B/ribosomal protein S6 family protein	NA	Translation elongation factor EF1B/ribosomal protein S6 family protein; FUNCTIONS IN: structural constituent of ribosome, rRNA binding; INVOLVED IN: translation, ribosome biogenesis; LOCATED IN: thylakoid, chloroplast thylakoid membrane, ribosome, chloroplast; EXPRESSED IN: 22 plant structures; EXPRESSED DURING: 13 growth stages; CONTAINS InterPro DOMAIN/s: Translation elongation factor EF1B/ribo…	AT1G64510	0.135747	0.0151362	-0.659327	0.0219727	-0.812209	0.388773	0.151187	-0.350441	0.215793	-0.434422	-1.5067	-1.60517	-0.120278	-0.065809		1	1	0.234217	0.985645	8.62e-05	1	0.949963	0.54823	0.703388	0.39969	0.0203687	0.0169711	1.08015	0.98451
protein_coding	Ribosomal protein L19 family protein	NA	Ribosomal protein L19 family protein; FUNCTIONS IN: structural constituent of ribosome; INVOLVED IN: translation, ribosome biogenesis; LOCATED IN: ribosome, chloroplast stroma, chloroplast, membrane, chloroplast envelope; EXPRESSED IN: 23 plant structures; EXPRESSED DURING: 13 growth stages; CONTAINS InterPro DOMAIN/s: Ribosomal protein L19 (InterPro:IPR001857); BEST Arabidopsis thaliana protein …	AT5G47190	0.246594	-0.3803	-0.815358	0.021473	-0.880507	0.580966	-0.172573	-0.462005	0.110712	-0.702247	-1.55903	-1.41785	-0.214243	-0.281391		1	0.492475	0.110314	1	2.9e-05	1	0.984376	0.397742	1	0.0283464	0.0158223	0.0318822	1.09805	1.12546
protein_coding	NA	NA	unknown protein; FUNCTIONS IN: molecular_function unknown; INVOLVED IN: biological_process unknown; LOCATED IN: chloroplast thylakoid membrane; EXPRESSED IN: 23 plant structures; EXPRESSED DURING: 13 growth stages; Has 121 Blast hits to 121 proteins in 17 species: Archae - 0; Bacteria - 0; Metazoa - 0; Fungi - 0; Plants - 121; Viruses - 0; Other Eukaryotes - 0 (source: NCBI BLink).	AT5G02160	0.500631	-0.376763	-0.602568	-0.206372	-0.816731	0.801767	0.041998	-0.456843	-0.233107	-0.55653	-1.5922	-2.17928	-0.2512	-0.222696		1	0.552807	0.245697	0.793931	0.000514218	1	1	0.367899	0.495668	0.0723354	0.0161599	0.0032549	1.06071	1.03764
protein_coding	NAD(P)-binding Rossmann-fold superfamily protein	NA	NAD(P)-binding Rossmann-fold superfamily protein; FUNCTIONS IN: oxidoreductase activity, binding, catalytic activity; INVOLVED IN: oxidation reduction, metabolic process; EXPRESSED IN: 22 plant structures; EXPRESSED DURING: 13 growth stages; CONTAINS InterPro DOMAIN/s: NAD(P)-binding domain (InterPro:IPR016040), Glucose/ribitol dehydrogenase (InterPro:IPR002347), Short-chain dehydrogenase/reducta…	AT2G29310	0.122088	-0.125737	-0.576625	-0.427155	-0.863383	0.0555734	0.132459	-0.178107	-0.0189844	0.0494423	-2.0803	-2.23861	-1.34194	-0.479392		1	0.87846	0.249266	0.451897	0.000121219	1	0.969114	0.764424	0.923385	0.91882	0.00236937	0.00255224	0.0672184	1.12491
protein_coding	NAD(P)-linked oxidoreductase superfamily protein	NA	NAD(P)-linked oxidoreductase superfamily protein; FUNCTIONS IN: oxidoreductase activity; INVOLVED IN: oxidation reduction; LOCATED IN: chloroplast thylakoid membrane, chloroplast, membrane; EXPRESSED IN: 21 plant structures; EXPRESSED DURING: 13 growth stages; CONTAINS InterPro DOMAIN/s: Aldo/keto reductase (InterPro:IPR001395); Has 297 Blast hits to 297 proteins in 86 species: Archae - 0; Bacter…	AT1G14345	-0.00300919	-0.0571593	-0.33217	-0.145283	-0.775692	0.368405	-0.278472	-0.29136	-0.0383865	-0.397171	-2.08206	-1.85529	-0.958756	-0.113215		1	0.935025	0.60867	0.912481	0.000989937	1	0.785923	0.583989	1	0.687843	0.00252846	0.00863218	0.219746	1.10316
protein_coding	chlororespiratory reduction 3	Likely a subunit of the chloroplast NAD(P)H dehydrogenase complex, involved in PSI cyclic electron transport. Located in the membrane fraction of chloroplast. Mutant has impaired NAD(P)H dehydrogenase activity.	CHLORORESPIRATORY REDUCTION 3 (CRR3); FUNCTIONS IN: molecular_function unknown; INVOLVED IN: photosynthetic electron transport in photosystem I; LOCATED IN: chloroplast, NAD(P)H dehydrogenase complex (plastoquinone), membrane; EXPRESSED IN: 22 plant structures; EXPRESSED DURING: 15 growth stages; Has 17 Blast hits to 17 proteins in 8 species: Archae - 0; Bacteria - 0; Metazoa - 0; Fungi - 0; Plan…	AT2G01590	0.0331199	-0.443805	-0.697441	-0.36704	-0.911068	0.185842	-0.178887	-0.472067	0.0165218	-0.193062	-1.50725	-1.88736	-0.526478	-0.141071		1	0.331493	0.139941	0.453195	2.34e-05	1	0.938792	0.311434	1	0.774618	0.02	0.00697021	0.72002	1.0782
protein_coding	DnaJ/Hsp40 cysteine-rich domain superfamily protein	NA	DnaJ/Hsp40 cysteine-rich domain superfamily protein; FUNCTIONS IN: unfolded protein binding, heat shock protein binding; INVOLVED IN: protein folding; LOCATED IN: chloroplast thylakoid membrane, chloroplast stroma, chloroplast; EXPRESSED IN: 23 plant structures; EXPRESSED DURING: 13 growth stages; CONTAINS InterPro DOMAIN/s: Heat shock protein DnaJ, cysteine-rich domain (InterPro:IPR001305); Has …	AT1G75690	-0.0018839	-0.499946	-0.447046	-0.54322	-0.532996	0.328126	-0.189946	-0.112633	-0.381236	-0.304015	-1.65541	-1.79229	-0.189419	-0.0214749		1	0.141606	0.436592	0.198326	9.23e-05	1	0.872615	0.751284	0.335224	0.470742	0.0126544	0.0100323	1.09742	0.985289
protein_coding	NA	Encodes a defensin-like (DEFL) family protein.	LOCATED IN: endomembrane system; EXPRESSED IN: 15 plant structures; EXPRESSED DURING: 9 growth stages; CONTAINS InterPro DOMAIN/s: S locus-related glycoprotein 1 binding pollen coat (InterPro:IPR010851); BEST Arabidopsis thaliana protein match is: S locus-related glycoprotein 1 (SLR1) binding pollen coat protein family (TAIR:AT3G05727.1); Has 32 Blast hits to 32 proteins in 3 species: Archae - 0;…	AT3G05730	0.396658	-0.485864	-0.893777	-1.07508	-0.917417	0.244575	-0.0407969	-0.521908	-0.0710374	-0.27391	-1.0646	-1.81629	0.0481182	0.00134837		1	0.480927	0.0914019	0.00258672	1.23e-05	1	0.970073	0.326254	0.803318	0.402996	0.104411	0.0127025	1.12634	1.11997
protein_coding	NA	NA	unknown protein; Has 29 Blast hits to 29 proteins in 12 species: Archae - 0; Bacteria - 0; Metazoa - 0; Fungi - 2; Plants - 27; Viruses - 0; Other Eukaryotes - 0 (source: NCBI BLink).	AT1G21500	0.215387	-0.583844	-0.258861	-0.326014	-1.15109	0.281486	-0.329866	-0.0599502	-0.303576	-1.14163	-1.07985	-2.02567	-0.161535	-0.112142		1	0.200918	0.721336	0.528187	3.58e-08	1	0.801743	0.918879	0.294709	1.97e-05	0.0922166	0.00582587	1.09792	0.961872
protein_coding	NA	NA	unknown protein; Has 52 Blast hits to 46 proteins in 20 species: Archae - 0; Bacteria - 0; Metazoa - 0; Fungi - 0; Plants - 45; Viruses - 0; Other Eukaryotes - 7 (source: NCBI BLink).	AT3G50685	0.0483521	-0.320281	0.0285601	-0.527902	-1.07158	-0.25763	-0.177641	0.0968856	-0.503567	-0.980658	-1.82194	-2.10706	-0.210234	-0.171226		1	0.724464	1	0.314849	0.000153678	1	0.953197	0.932293	0.135267	0.00193286	0.00682648	0.00383735	1.10043	1.00221
protein_coding	FASCICLIN-like arabinogalactan protein 13 precursor	NA	FASCICLIN-like arabinogalactan protein 13 precursor (FLA13); FUNCTIONS IN: molecular_function unknown; LOCATED IN: anchored to plasma membrane, plasma membrane, anchored to membrane, plant-type cell wall; EXPRESSED IN: 23 plant structures; EXPRESSED DURING: 14 growth stages; CONTAINS InterPro DOMAIN/s: FAS1 domain (InterPro:IPR000782); BEST Arabidopsis thaliana protein match is: FASCICLIN-like ar…	AT5G44130	-0.199893	-0.310455	-0.38388	-0.726118	-0.950583	0.255578	-0.28098	-0.338832	-0.597251	-0.982693	-1.66843	-1.80701	-1.49622	-0.495666		1	0.535696	0.516623	0.167556	1.68e-06	1	0.82566	0.499234	0.202119	0.00222909	0.0110037	0.00953309	0.0484286	1.10932
protein_coding	lipid transfer protein	Predicted to encode a PR (pathogenesis-related) protein. Belongs to the lipid transfer protein (PR-14) family with the following members: At2g38540/LTP1, At2g38530/LTP2, At5g59320/LTP3, At5g59310/LTP4, At3g51600/LTP5, At3g08770/LTP6, At2g15050/LTP7, At2g18370/LTP8, At2g15325/LTP9, At5g01870/LTP10, At4g33355/LTP11, At3g51590/LTP12, At5g44265/LTP13, At5g62065/LTP14, At4g08530/LTP15.	lipid transfer protein (LTP); FUNCTIONS IN: lipid binding; INVOLVED IN: lipid transport; LOCATED IN: endomembrane system; EXPRESSED IN: 20 plant structures; EXPRESSED DURING: 13 growth stages; CONTAINS InterPro DOMAIN/s: Bifunctional inhibitor/plant lipid transfer protein/seed storage (InterPro:IPR016140), Plant lipid transfer protein/seed storage/trypsin-alpha amylase inhibitor (InterPro:IPR0036…	AT2G15050	0.395326	-0.770714	-0.565358	-0.919269	-1.73235	0.523615	-0.338995	-0.0436959	-0.502122	-1.1156	-0.913536	-1.83136	-0.240589	0.0126276		1	0.249962	0.295038	0.0270465	3.16e-09	1	0.928351	0.936729	0.156465	0.0135262	0.13374	0.00818972	1.09981	1.09063
protein_coding	Barwin-like endoglucanases superfamily protein	member of Alpha-Expansin Gene Family. Naming convention from the Expansin Working Group (Kende et al, 2004. Plant Mol Bio). Involved in the formation of nematode-induced syncytia in roots of Arabidopsis thaliana.	EXP3; INVOLVED IN: in 6 processes; LOCATED IN: endomembrane system, extracellular region; EXPRESSED IN: 21 plant structures; EXPRESSED DURING: 13 growth stages; CONTAINS InterPro DOMAIN/s: Barwin-related endoglucanase (InterPro:IPR009009), Pollen allergen, N-terminal (InterPro:IPR014734), Expansin (InterPro:IPR002963), Rare lipoprotein A (InterPro:IPR005132), Expansin/Lol pI (InterPro:IPR007118),…	AT2G37640	0.186546	0.501496	-0.255219	-0.39706	-1.67697	0.439663	0.506786	0.36567	0.24233	-0.360273	-2.37884	-2.62067	-0.334498	-0.469457		1	0.285223	0.742104	0.668594	9.2e-05	1	0.634137	0.581213	1	0.790465	0.000887097	0.000761905	1.0237	1.15346
protein_coding	Bifunctional inhibitor/lipid-transfer protein/seed storage 2S albumin superfamily protein	NA	Bifunctional inhibitor/lipid-transfer protein/seed storage 2S albumin superfamily protein; CONTAINS InterPro DOMAIN/s: Bifunctional inhibitor/plant lipid transfer protein/seed storage (InterPro:IPR016140), Plant lipid transfer protein/seed storage/trypsin-alpha amylase inhibitor (InterPro:IPR003612); BEST Arabidopsis thaliana protein match is: Bifunctional inhibitor/lipid-transfer protein/seed st…	AT3G43720	0.38214	0.488859	-0.252642	0.025275	-1.18273	0.61668	0.823449	0.199193	0.318595	-0.630096	-1.88607	-2.36152	-0.15427	-0.16919		1	0.367941	0.711545	1	4.17e-05	1	0.34683	0.807114	0.826952	0.348183	0.00564767	0.00164167	1.08685	0.970175
protein_coding	FK506-binding protein 13	Peptidyl-Prolyl Isomerase located in chloroplast thylakoid lumen	FK506-binding protein 13 (FKBP13); FUNCTIONS IN: FK506 binding, peptidyl-prolyl cis-trans isomerase activity; INVOLVED IN: protein folding; LOCATED IN: thylakoid lumen, chloroplast thylakoid lumen, chloroplast; EXPRESSED IN: 22 plant structures; EXPRESSED DURING: 14 growth stages; CONTAINS InterPro DOMAIN/s: Peptidyl-prolyl cis-trans isomerase, FKBP-type (InterPro:IPR001179); BEST Arabidopsis tha…	AT5G45680	0.37804	0.402289	-0.67668	-0.225045	-0.946914	0.63597	0.829234	-0.106776	0.338413	-0.487676	-1.9218	-1.8194	-0.407528	-0.24087		1	0.351663	0.1767	0.799923	4.56e-06	1	0.112721	0.916924	0.74529	0.17816	0.00513143	0.00969343	0.911408	1.16151
protein_coding	NDR1/HIN1-like 12	Encodes a protein whose sequence is similar to tobacco hairpin-induced gene (HIN1) and Arabidopsis non-race specific disease resistance gene (NDR1). Expression is not altered in response to cucumber mosaic virus or spermine.	NDR1/HIN1-like 12 (NHL12); CONTAINS InterPro DOMAIN/s: Late embryogenesis abundant protein, group 2 (InterPro:IPR004864); BEST Arabidopsis thaliana protein match is: Late embryogenesis abundant (LEA) hydroxyproline-rich glycoprotein family (TAIR:AT3G52470.1); Has 889 Blast hits to 889 proteins in 28 species: Archae - 0; Bacteria - 0; Metazoa - 0; Fungi - 0; Plants - 889; Viruses - 0; Other Eukary…	AT2G35960	0.0996211	0.442038	-0.156246	-0.0730545	-0.828842	0.733364	0.756285	0.0862138	0.468928	-0.247864	-1.8277	-1.6742	-0.150504	-0.0947659		1	0.373931	0.807933	1	0.00367158	1	0.323701	0.949756	0.509435	1	0.00619212	0.0137324	1.08556	1.15343
protein_coding	arabinogalactan-protein family	NA	arabinogalactan-protein family; INVOLVED IN: biological_process unknown; LOCATED IN: endomembrane system; EXPRESSED IN: 22 plant structures; EXPRESSED DURING: 13 growth stages; Has 61554 Blast hits to 29210 proteins in 1485 species: Archae - 170; Bacteria - 11775; Metazoa - 21955; Fungi - 6238; Plants - 10828; Viruses - 2421; Other Eukaryotes - 8167 (source: NCBI BLink).	AT4G16980	0.59191	0.0981617	0.0943666	0.385987	-0.689039	0.755617	-0.0947877	-0.00929859	0.463999	-0.441957	-1.68834	-2.1151	-0.739787	-0.300527		1	0.958047	0.997801	0.524277	0.0030784	1	0.950915	0.915309	0.447956	0.519382	0.0108587	0.00370122	0.374268	1.15179
protein_coding	arabinogalactan protein 4	Encodes arabinogalactan-protein (AGP4).	arabinogalactan protein 4 (AGP4); Has 1807 Blast hits to 1807 proteins in 277 species: Archae - 0; Bacteria - 0; Metazoa - 736; Fungi - 347; Plants - 385; Viruses - 0; Other Eukaryotes - 339 (source: NCBI BLink).	AT5G10430	0.342864	0.141207	0.0955875	0.343197	-1.08332	0.830258	0.14202	0.330494	0.660409	-0.405462	-0.963739	-1.35149	-0.339141	-0.742122		1	0.964913	1	0.452468	0.000879049	1	1	0.719335	0.140165	0.31073	0.116229	0.0379883	0.942821	1.00854
protein_coding	ribosomal protein S9	ribosomal protein S9, nuclear encoded component of the chloroplast ribosome	ribosomal protein S9 (RPS9); FUNCTIONS IN: structural constituent of ribosome; INVOLVED IN: translation; LOCATED IN: in 6 components; EXPRESSED IN: 22 plant structures; EXPRESSED DURING: 13 growth stages; CONTAINS InterPro DOMAIN/s: Ribosomal protein S5 domain 2-type fold (InterPro:IPR020568), Ribosomal protein S9 (InterPro:IPR000754), Ribosomal protein S5 domain 2-type fold, subgroup (InterPro:I…	AT1G74970	0.411639	0.244717	-0.141605	0.141253	-0.634706	0.705529	0.183574	-0.000921586	0.401709	-0.174805	-1.04032	-1.35573	-0.0115576	-0.133552		1	0.694784	0.883258	0.824051	0.000508874	1	0.941895	0.94518	0.362431	1	0.093005	0.03954	1.02759	0.981856
protein_coding	AIG2-like (avirulence induced gene) family protein	NA	AIG2-like (avirulence induced gene) family protein; CONTAINS InterPro DOMAIN/s: Butirosin biosynthesis, BtrG-like (InterPro:IPR013024), AIG2-like (InterPro:IPR009288); BEST Arabidopsis thaliana protein match is: AIG2-like (avirulence induced gene) family protein (TAIR:AT5G46720.1); Has 320 Blast hits to 319 proteins in 102 species: Archae - 4; Bacteria - 64; Metazoa - 146; Fungi - 0; Plants - 79;…	AT3G02910	0.523528	0.392816	-0.0909617	0.0253856	-0.880852	0.595256	0.475102	-0.259158	0.288229	0.071253	-1.21709	-1.53418	-1.28351	-0.49826		1	0.504384	0.978539	1	0.00580821	1	0.768358	0.62177	0.572036	0.891189	0.0487218	0.0201405	0.0717579	1.16866
protein_coding	Pollen Ole e 1 allergen and extensin family protein	NA	Pollen Ole e 1 allergen and extensin family protein; FUNCTIONS IN: molecular_function unknown; INVOLVED IN: biological_process unknown; LOCATED IN: endomembrane system; EXPRESSED IN: 22 plant structures; EXPRESSED DURING: 13 growth stages; CONTAINS InterPro DOMAIN/s: Pollen Ole e 1 allergen/extensin (InterPro:IPR006041); BEST Arabidopsis thaliana protein match is: Pollen Ole e 1 allergen and exte…	AT5G41050	0.369381	-0.218861	-0.573684	-0.175422	-1.77253	1.07825	0.563018	0.109158	0.467555	0.00493161	-1.57987	-1.5966	-1.34354	-0.360269		1	0.810599	0.427927	0.882301	1.68e-05	1	0.613116	0.86253	0.811746	0.992173	0.0128771	0.0160463	0.0603425	1.16686
protein_coding	NA	NA	unknown protein; FUNCTIONS IN: molecular_function unknown; INVOLVED IN: biological_process unknown; LOCATED IN: plasma membrane; EXPRESSED IN: 21 plant structures; EXPRESSED DURING: 11 growth stages; Has 16 Blast hits to 16 proteins in 8 species: Archae - 0; Bacteria - 0; Metazoa - 0; Fungi - 0; Plants - 16; Viruses - 0; Other Eukaryotes - 0 (source: NCBI BLink).	AT2G38465	-0.0550842	-0.503482	0.0922232	-0.575456	-0.933673	1.11471	0.156711	0.177733	0.0857882	-0.0597687	-1.36527	-1.33713	-0.531751	0.387956		1	0.531281	1	0.30025	0.00757102	1	0.88589	0.901373	1	0.884968	0.0276294	0.0379197	0.675278	1.17457
protein_coding	RING/U-box superfamily protein	NA	RING/U-box superfamily protein; CONTAINS InterPro DOMAIN/s: Zinc finger, RING-type, conserved site (InterPro:IPR017907); BEST Arabidopsis thaliana protein match is: RING/U-box superfamily protein (TAIR:AT3G47160.1); Has 35333 Blast hits to 34131 proteins in 2444 species: Archae - 798; Bacteria - 22429; Metazoa - 974; Fungi - 991; Plants - 531; Viruses - 0; Other Eukaryotes - 9610 (source: NCBI BL…	AT5G01520	-0.251209	0.146765	0.246387	-0.606197	-1.50899	-0.0085892	0.624546	-0.0700867	-0.173759	-0.753972	-1.19817	-1.27404	-0.923278	-0.0707565		1	0.984394	0.675982	0.369738	0.00749153	1	0.881751	1	0.869294	0.316738	0.0471028	0.0453348	0.23645	1.0327
protein_coding	NA	NA	unknown protein; FUNCTIONS IN: molecular_function unknown; INVOLVED IN: biological_process unknown; LOCATED IN: endomembrane system; EXPRESSED IN: 23 plant structures; EXPRESSED DURING: 13 growth stages; BEST Arabidopsis thaliana protein match is: unknown protein (TAIR:AT3G15358.1); Has 49 Blast hits to 49 proteins in 9 species: Archae - 0; Bacteria - 0; Metazoa - 0; Fungi - 0; Plants - 49; Virus…	AT1G53035	-0.321586	-0.203949	-0.445581	-0.164981	-1.15638	0.338869	0.708453	0.34208	0.205431	-0.729359	-1.26873	-1.18713	-0.30298	-0.947266		1	0.692157	0.588332	0.939721	0.000230627	1	0.399545	0.827842	1	0.0363508	0.0444112	0.0630119	1.06113	0.600544
protein_coding	Protein of unknown function (DUF1645)	NA	Protein of unknown function (DUF1645); CONTAINS InterPro DOMAIN/s: Protein of unknown function DUF1645 (InterPro:IPR012442); BEST Arabidopsis thaliana protein match is: Protein of unknown function (DUF1645) (TAIR:AT1G23710.1); Has 179 Blast hits to 179 proteins in 22 species: Archae - 0; Bacteria - 0; Metazoa - 9; Fungi - 0; Plants - 162; Viruses - 0; Other Eukaryotes - 8 (source: NCBI BLink).	AT1G70420	0.175013	0.0284615	-0.621359	-0.843789	-1.13543	0.718452	0.961537	0.0907253	-0.256059	-0.244028	-0.91406	-1.49119	-0.17728	-0.208203		1	0.949361	0.439435	0.0523148	0.00420276	1	0.344532	0.935209	0.483009	0.673919	0.130924	0.0236071	1.1004	0.97194
protein_coding	Ribosomal protein L34	NA	Ribosomal protein L34; FUNCTIONS IN: structural constituent of ribosome; INVOLVED IN: translation, ribosome biogenesis; LOCATED IN: ribosome, intracellular, chloroplast; EXPRESSED IN: 22 plant structures; EXPRESSED DURING: 13 growth stages; CONTAINS InterPro DOMAIN/s: Ribosomal protein L34 (InterPro:IPR000271); Has 615 Blast hits to 615 proteins in 261 species: Archae - 0; Bacteria - 556; Metazoa…	AT1G29070	0.388169	0.566933	-0.0944618	-0.536375	-0.645984	0.683883	0.748061	0.379129	-0.332067	-0.514669	-1.20826	-1.54215	-0.124466	-0.141947		1	0.146957	0.941259	0.247476	0.00067404	1	0.270697	0.629537	0.381758	0.204673	0.0577401	0.021924	1.06968	1.0172
protein_coding	SAUR-like auxin-responsive protein family	NA	SAUR-like auxin-responsive protein family ; CONTAINS InterPro DOMAIN/s: Auxin responsive SAUR protein (InterPro:IPR003676); BEST Arabidopsis thaliana protein match is: SAUR-like auxin-responsive protein family (TAIR:AT2G16580.1); Has 1475 Blast hits to 1458 proteins in 28 species: Archae - 0; Bacteria - 0; Metazoa - 0; Fungi - 0; Plants - 1474; Viruses - 0; Other Eukaryotes - 1 (source: NCBI BLin…	AT4G34760	0.719999	0.830336	0.0933267	-0.190636	-0.979314	1.2447	1.34912	0.758399	0.366668	-0.361408	-1.03684	-1.30074	-0.930149	-0.521238		1	0.132084	0.99144	0.785583	0.00429482	1	0.0722744	0.132736	0.998524	0.93176	0.105075	0.04802	0.235594	1.12668
protein_coding	rapid alkalinization factor 23	Encodes RALF23, a member of a diversely expressed predicted peptide family showing sequence similarity to tobacco Rapid Alkalinization Factor (RALF), and is believed to play an essential role in the physiology of Arabidopsis. Consists of a single exon and is characterized by a conserved C-terminal motif and N-terminal signal peptide. RALF23 is significantly downregulated by brassinolide treatment…	rapid alkalinization factor 23 (RALF23); CONTAINS InterPro DOMAIN/s: Rapid ALkalinization Factor (InterPro:IPR008801); BEST Arabidopsis thaliana protein match is: ralf-like 33 (TAIR:AT4G15800.1); Has 261 Blast hits to 261 proteins in 20 species: Archae - 0; Bacteria - 0; Metazoa - 0; Fungi - 2; Plants - 259; Viruses - 0; Other Eukaryotes - 0 (source: NCBI BLink).	AT3G16570	0.558502	0.351009	0.16006	-0.033105	-1.09492	1.34297	1.04893	0.81887	0.0437728	-0.91164	-1.32153	-1.38762	-0.734381	-0.721465		1	0.692578	0.928364	0.93232	0.00205831	1	0.352592	0.134269	0.809074	0.169232	0.0350403	0.0334872	0.399084	1.02102
protein_coding	NA	NA	unknown protein; FUNCTIONS IN: molecular_function unknown; INVOLVED IN: biological_process unknown; LOCATED IN: endomembrane system; EXPRESSED IN: 19 plant structures; EXPRESSED DURING: 10 growth stages; BEST Arabidopsis thaliana protein match is: unknown protein (TAIR:AT3G19030.1); Has 24 Blast hits to 24 proteins in 2 species: Archae - 0; Bacteria - 0; Metazoa - 0; Fungi - 0; Plants - 24; Virus…	AT1G49500	0.326351	0.224594	0.578109	-0.399847	-1.53814	0.44092	1.00405	0.649125	-0.342426	-1.32991	-1.44558	-2.01533	0.308583	0.443387		1	0.921415	0.370106	0.504033	0.000249398	1	0.495828	0.30576	0.284649	0.00284843	0.0245629	0.00692174	1.07471	0.968693
protein_coding	glycine-rich protein	NA	glycine-rich protein; FUNCTIONS IN: molecular_function unknown; INVOLVED IN: biological_process unknown; LOCATED IN: endomembrane system; EXPRESSED IN: 22 plant structures; EXPRESSED DURING: 13 growth stages; Has 598 Blast hits to 551 proteins in 129 species: Archae - 0; Bacteria - 185; Metazoa - 152; Fungi - 22; Plants - 163; Viruses - 2; Other Eukaryotes - 74 (source: NCBI BLink).	AT4G29020	0.530462	0.721682	0.236402	-0.0755921	-1.6641	0.66093	0.877619	0.725987	0.365947	-1.17687	-1.65208	-2.21152	0.00309772	-0.42456		1	0.158549	0.787347	0.985645	0.000122815	1	0.439531	0.167122	0.681919	0.0640986	0.0141087	0.00337419	1.1192	1.15742
protein_coding	Integrase-type DNA-binding superfamily protein	encodes a member of the DREB subfamily A-4 of ERF/AP2 transcription factor family. The protein contains one AP2 domain. There are 17 members in this subfamily including TINY.	Integrase-type DNA-binding superfamily protein; FUNCTIONS IN: DNA binding, sequence-specific DNA binding transcription factor activity; INVOLVED IN: regulation of transcription, DNA-dependent; LOCATED IN: nucleus, chloroplast; EXPRESSED IN: 10 plant structures; EXPRESSED DURING: 6 growth stages; CONTAINS InterPro DOMAIN/s: DNA-binding, integrase-type (InterPro:IPR016177), Pathogenesis-related tra…	AT1G01250	0.330993	0.187293	0.166156	-0.204267	-1.88849	0.418159	0.737273	0.251095	0.146157	-1.22046	-1.23614	-1.31573	-0.0620981	-0.220757		1	0.869123	0.816513	0.946534	1.94e-05	1	0.632643	0.571415	0.998317	0.0427369	0.0453949	0.0410698	1.04032	1.0441
protein_coding	Scorpion toxin-like knottin superfamily protein	Encodes a defensin-like (DEFL) family protein.	Scorpion toxin-like knottin superfamily protein; FUNCTIONS IN: ion channel inhibitor activity; INVOLVED IN: defense response; LOCATED IN: endomembrane system, extracellular region; EXPRESSED IN: 20 plant structures; EXPRESSED DURING: 13 growth stages; CONTAINS InterPro DOMAIN/s: Scorpion long chain toxin (InterPro:IPR002061), Knottin (InterPro:IPR003614); BEST Arabidopsis thaliana protein match i…	AT2G43535	-0.127844	-1.19489	-0.304504	-1.02914	-0.127474	-0.602836	-0.749246	-0.0661694	-0.699688	-0.292356	-1.28024	-1.61618	0.614652	0.495318		1	0.000973507	0.587343	0.0330765	0.829929	1	0.408096	0.860913	0.085073	0.584264	0.0444281	0.0178321	0.538631	0.779615
protein_coding	Photosystem II 5 kD protein	NA	Photosystem II 5 kD protein; FUNCTIONS IN: molecular_function unknown; INVOLVED IN: response to UV-B, response to wounding, response to ozone; LOCATED IN: chloroplast thylakoid membrane, chloroplast thylakoid lumen, chloroplast photosystem II; EXPRESSED IN: 22 plant structures; EXPRESSED DURING: 13 growth stages; BEST Arabidopsis thaliana protein match is: photosystem II subunit T (TAIR:AT3G21055…	AT1G51400	-0.0760577	-0.87162	0.143682	-0.51838	-0.665699	-0.527246	-0.771767	0.054019	-0.710339	-0.42613	-0.449155	-1.27481	-0.477971	-0.00542784		1	0.0308093	0.97423	0.300661	0.000222397	1	0.157928	1	0.00203107	0.0799808	0.636862	0.0489004	0.83182	0.951608
protein_coding	Protein of unknown function (DUF1677)	NA	Protein of unknown function (DUF1677); CONTAINS InterPro DOMAIN/s: Protein of unknown function DUF1677, plant (InterPro:IPR012876); BEST Arabidopsis thaliana protein match is: Protein of unknown function (DUF1677) (TAIR:AT2G09970.1); Has 35333 Blast hits to 34131 proteins in 2444 species: Archae - 798; Bacteria - 22429; Metazoa - 974; Fungi - 991; Plants - 531; Viruses - 0; Other Eukaryotes - 961…	AT1G72510	0.0829672	-0.406338	-0.29235	-0.456703	-1.22852	-0.0101329	0.275255	-0.248329	-0.448589	-1.02975	-1.31047	-0.739962	0.490143	-0.280066		1	0.57201	0.745043	0.402452	0.000326282	1	0.890192	1	0.349909	0.00771421	0.0334544	0.260924	0.692247	1.11941
protein_coding	NA	NA	LOCATED IN: thylakoid, chloroplast thylakoid membrane, chloroplast, chloroplast envelope; EXPRESSED IN: 22 plant structures; EXPRESSED DURING: 13 growth stages; CONTAINS InterPro DOMAIN/s: Thylakoid soluble phosphoprotein TSP9 (InterPro:IPR021584); Has 37 Blast hits to 37 proteins in 10 species: Archae - 0; Bacteria - 0; Metazoa - 0; Fungi - 0; Plants - 37; Viruses - 0; Other Eukaryotes - 0 (sour…	AT3G47070	-0.126707	-0.473836	-0.0745269	-0.615313	-0.912549	-0.0413186	-0.133253	0.317597	-0.288206	-0.346372	-1.21788	-0.662247	-0.345278	-0.106921		1	0.284396	0.915975	0.0818199	5.41e-05	1	0.998071	0.589619	0.368447	0.532502	0.0488063	0.337833	1.00966	1.05837
protein_coding	glycine-rich protein	NA	glycine-rich protein; Has 4612 Blast hits to 1114 proteins in 179 species: Archae - 18; Bacteria - 331; Metazoa - 2059; Fungi - 93; Plants - 1513; Viruses - 136; Other Eukaryotes - 462 (source: NCBI BLink).	AT1G66820	0.620535	-0.609689	0.323393	-0.197403	-1.22539	0.314632	-0.466968	0.498711	-0.231044	-0.78046	-1.29239	-0.772955	-0.403924	-0.319067		1	0.287246	0.745888	0.784656	4.86e-10	1	0.643316	0.371204	0.639334	0.00103475	0.0424151	0.234169	0.930621	1.15722
protein_coding	Bifunctional inhibitor/lipid-transfer protein/seed storage 2S albumin superfamily protein	NA	Bifunctional inhibitor/lipid-transfer protein/seed storage 2S albumin superfamily protein; FUNCTIONS IN: lipid binding; INVOLVED IN: lipid transport; LOCATED IN: endomembrane system; EXPRESSED IN: 22 plant structures; EXPRESSED DURING: 13 growth stages; CONTAINS InterPro DOMAIN/s: Bifunctional inhibitor/plant lipid transfer protein/seed storage (InterPro:IPR016140), Plant lipid transfer protein/s…	AT1G48750	-0.27125	-1.01695	0.229723	-0.721112	-0.924603	0.214572	-0.479931	0.251049	0.237784	-0.0532861	-1.12126	-1.34577	-1.3259	-0.296727		1	0.00405099	0.709678	0.153101	0.00353692	1	0.634137	0.708748	1	0.916648	0.0595564	0.0370781	0.0675294	1.16145
[truncated: 158 more rows]

## Sheet: SA marker genes expression
					Log2 fold change
Type	Short_description	Curator_summary	Computational_description	Locus	AlNc14-Mock_0dpi.tab	AlNc14-Mock_2dpi.tab	AlNc14-Mock_4dpi.tab	AlNc14-Mock_6dpi.tab	AlNc14-Mock_8dpi.tab	BTH_Wang-data-BTH08hr.tab	BTH_Wang-data-BTH24hr.tab
[truncated: 16 more rows]
